# Supplementary material for: The intrinsically disordered cytoplasmic tail of a dendrite branching receptor uses two distinct mechanisms to regulate the actin cytoskeleton
Source: eLife journal article supplement (doi:10.7554/elife.88492), 2023-07-17
Supplement: fig1-data2 [file Figure 1B Source Data 1.xlsx]

## Sheet: Global Avg
	GST-HPO30 Signal	WRC Signal	Corrected WRC	W:G Ratio	Ratio to WT			GST-HPO30 Signal	WRC Signal	Corrected WRC	W:G Ratio	Ratio to WT			GST-HPO30 Signal	WRC Signal	Corrected WRC	Ratio	Ratio to WT			Sample	HPO30 signal	WRc Signal	Corrected WRc Signal	WRC:HP Ratio	Mut:Wt Ratio		Sample	HPO30 signal	WRc Signal	Corrected WRc Signal	WRC:HP Ratio	Mut:Wt Ratio		Sample	HPO30 signal	WRc Signal	Corrected WRc Signal	WRC:HP Ratio	Mut:Wt Ratio
GST		234.799					GST		0					GST		0						GST		300.799					GST		234.799					GST		308.041
GST-HPO30 WT	20701.9	38401.4	38166.6	1.84362	1		GST-HPO30 WT	24171.2	27280.3	27280.3	1.12863	1		GST-HPO30 WT	26564.9	32199.8	32199.8	1.21212	1			HPO30-GST	12070.8	9835.14	9534.34	0.789866	1		HPO30-GST	15916	9437.25	9202.45	0.57819	1		HPO30-GST	11905.1	13113.7	12805.6	1.07564	1
GST-HPO30 Ala#1	16843	16092.9	15858.1	0.941521	0.510691		GST-HPO30 Ala#1	24540	13478.1	13478.1	0.549232	0.486637		GST-HPO30 Ala#1	25140.8	26218.8	26218.8	1.04288	0.860377			HPO30 Ala#8-GST	20928.1	13788.8	13488	0.644494	0.815954		HPO30 Ala#8-GST	26933.9	9200.06	8965.26	0.332861	0.575696		HPO30 Ala#8-GST	19967.1	15455	15147	0.758598	0.705254
GST-HPO30 Ala#2	19464.6	21608.4	21373.6	1.09808	0.595607		GST-HPO30 Ala#2	26295.7	16212.7	16212.7	0.616555	0.546287		GST-HPO30 Ala#2	28006.3	22412	22412	0.800249	0.660206			HPO30 Ala#9-GST	19297.7	8441.38	8140.58	0.421842	0.534068		HPO30 Ala#9-GST	32656.8	15426.3	15191.5	0.465188	0.804559		HPO30 Ala#9-GST	21228.8	17303.4	16995.4	0.800578	0.744282
GST-HPO30 Ala#3	20275.9	22627	22392.2	1.10437	0.599023		GST-HPO30 Ala#3	28547.6	16156.3	16156.3	0.565942	0.501443		GST-HPO30 Ala#3	30752.7	30811.8	30811.8	1.00192	0.826587			HPO30 Ala#10-GST	16686.8	17165.6	16864.8	1.01067	1.27954		HPO30 Ala#10-GST	30225.4	19589.4	19354.6	0.64034	1.10749		HPO30 Ala#10-GST	18176.1	15918.3	15610.2	0.858831	0.798439
GST-HPO30 Ala#4	19498.9	23697.5	23462.7	1.20328	0.652671		GST-HPO30 Ala#4	24702.4	19696.6	19696.6	0.797354	0.706481		GST-HPO30 Ala#4	27254	30839.5	30839.5	1.13156	0.933538			from 210304							from 210409
GST-HPO30 Ala#5	18255.3	8008.81	7774.02	0.42585	0.230985		GST-HPO30 Ala#5	22412.7	2555.9	2555.9	0.114038	0.101041		GST-HPO30 Ala#5	27680.1	9366.49	9366.49	0.338383	0.279167
GST-HPO30 Ala#6	18975.2	12740.6	12505.8	0.659062	0.357482		GST-HPO30 Ala#6	26601.1	8254.61	8254.61	0.31031	0.274945		GST-HPO30 Ala#6	28848.3	16618.3	16618.3	0.576058	0.475248
GST-HPO30 Ala#7	20164	14829.1	14594.3	0.72378	0.392586		GST-HPO30 Ala#7	27072.7	14382.6	14382.6	0.531259	0.470712		GST-HPO30 Ala#7	27972.6	16727.5	16727.5	0.597995	0.493346
HPO30 Ala#8-GST	26933.9	9200.06	8965.26	0.332861	0.575696
HPO30 Ala#9-GST	32656.8	15426.3	15191.5	0.465188	0.804559
HPO30 Ala#10-GST	30225.4	19589.4	19354.6	0.64034	1.10749
HPO30-GST	15916	9437.25	9202.45	0.57819	1
																					GST-HPO30 WT	GST-HPO30 Ala#1	GST-HPO30 Ala#2	GST-HPO30 Ala#3	GST-HPO30 Ala#4	GST-HPO30 Ala#5	GST-HPO30 Ala#6	GST-HPO30 Ala#7	HPO30 Ala#8-GST	HPO30 Ala#9-GST	HPO30 Ala#10-GST	HPO30-GST
																					1	0.510691	0.595607	0.599023	0.652671	0.230985	0.357482	0.392586	0.815954	0.534068	1.27954	1
	Average	Std Dev																			1	0.486637	0.546287	0.501443	0.706481	0.101041	0.274945	0.470712	0.575696	0.804559	1.10749	1
GST-HPO30 WT	1	0																			1	0.860377	0.660206	0.826587	0.933538	0.279167	0.475248	0.493346	0.705254	0.744282	0.798439	1
GST-HPO30 Ala#1	0.619235	0.209181
GST-HPO30 Ala#2	0.6007	0.0571302
GST-HPO30 Ala#3	0.642351	0.166846
GST-HPO30 Ala#4	0.76423	0.149073
GST-HPO30 Ala#5	0.203731	0.0921371
GST-HPO30 Ala#6	0.369225	0.100667
GST-HPO30 Ala#7	0.452215	0.0528657
HPO30 Ala#8-GST	0.698968	0.120252
HPO30 Ala#9-GST	0.694303	0.142003
HPO30 Ala#10-GST	1.06182	0.243782
HPO30-GST	1	0

## Sheet: statistics
GST-WT	A	1
GST-WT	A	1
GST-WT	A	1
Ala #1	B	0.510691
Ala #1	B	0.486637
Ala #1	B	0.860377
Ala #2	C	0.595607
Ala #2	C	0.546287
Ala #2	C	0.660206
Ala #3	D	0.599023
Ala #3	D	0.501443
Ala #3	D	0.826587
Ala #4	E	0.652671
Ala #4	E	0.706481
Ala #4	E	0.933538			B-A	-0.380764	-0.772578	0.0110495	0.0621141	n.s.
Ala #5	F	0.230985			C-A	-0.399299	-0.791112	-0.0074852	0.0430673	*
Ala #5	F	0.101041			D-A	-0.35765	-0.749464	0.0341636	0.0963495	n.s.
Ala #5	F	0.279167			E-A	-0.23577	-0.627584	0.156043	0.583575	n.s.
Ala #6	G	0.357482			F-A	-0.796269	-1.18808	-0.404456	8e-06	***
Ala #6	G	0.274945			G-A	-0.630776	-1.02259	-0.238963	0.0002821	***
Ala #6	G	0.475248			H-A	-0.547786	-0.9396	-0.155972	0.0017792	**
Ala #7	H	0.392586			I-A	-0.301032	-0.692846	0.0907814	0.252994	n.s.
Ala #7	H	0.470712			J-A	-0.305697	-0.697511	0.0861166	0.235327	n.s.
Ala #7	H	0.493346			K-A	0.0618244	-0.329989	0.453638	0.99998	n.s.
Ala #8	I	0.815954			L-A	0	-0.391814	0.391814	1
Ala #8	I	0.575696			C-B	-0.0185347	-0.410348	0.373279	1
Ala #8	I	0.705254			D-B	0.023114	-0.3687	0.414928	1
Ala #9	J	0.534068			E-B	0.144994	-0.24682	0.536807	0.965477
Ala #9	J	0.804559			F-B	-0.415505	-0.807319	-0.0236916	0.0309977
Ala #9	J	0.744282			G-B	-0.250012	-0.641826	0.141801	0.501703
ala #10	K	1.27954			H-B	-0.167022	-0.558836	0.224792	0.914967
ala #10	K	1.10749			I-B	0.0797318	-0.312082	0.471545	0.999763
ala #10	K	0.798439			J-B	0.075067	-0.316747	0.466881	0.999867
WT-GST	L	1			K-B	0.442589	0.0507749	0.834402	0.0176308
WT-GST	L	1			L-B	0.380764	-0.0110495	0.772578	0.0621141
WT-GST	L	1			D-C	0.0416488	-0.350165	0.433462	1
					E-C	0.163528	-0.228285	0.555342	0.925044
					F-C	-0.39697	-0.788784	-0.00515687	0.0451225
					G-C	-0.231478	-0.623291	0.160336	0.608466
					H-C	-0.148487	-0.540301	0.243326	0.959449
					I-C	0.0982666	-0.293547	0.49008	0.998396
					J-C	0.0936018	-0.298212	0.485415	0.998958
					K-C	0.461123	0.0693097	0.852937	0.0118815
					L-C	0.399299	0.0074852	0.791112	0.0430673
					E-D	0.12188	-0.269934	0.513693	0.990357
					F-D	-0.438619	-0.830433	-0.0468056	0.01917
					G-D	-0.273126	-0.66494	0.118687	0.377582
					H-D	-0.190136	-0.58195	0.201678	0.828222
					I-D	0.0566178	-0.335196	0.448431	0.999992
					J-D	0.051953	-0.339861	0.443767	0.999997
					K-D	0.419475	0.0276609	0.811288	0.0285679
					L-D	0.35765	-0.0341636	0.749464	0.0963495
					F-E	-0.560499	-0.952313	-0.168685	0.0013417
					G-E	-0.395006	-0.78682	-0.00319253	0.0469263
					H-E	-0.312016	-0.703829	0.0797979	0.212861
					I-E	-0.0652619	-0.457076	0.326552	0.999966
					J-E	-0.0699267	-0.46174	0.321887	0.999933
					K-E	0.297595	-0.0942188	0.689408	0.266603
					L-E	0.23577	-0.156043	0.627584	0.583575
					G-F	0.165493	-0.226321	0.557306	0.919477
					H-F	0.248483	-0.14333	0.640297	0.510375
					I-F	0.495237	0.103423	0.887051	0.0056714
					J-F	0.490572	0.0987586	0.882386	0.00628
					K-F	0.858094	0.46628	1.24991	2.2e-06
					L-F	0.796269	0.404456	1.18808	8e-06
					H-G	0.0829904	-0.308823	0.474804	0.999654
					I-G	0.329744	-0.0620694	0.721558	0.158546
					J-G	0.325079	-0.0667342	0.716893	0.171631
					K-G	0.692601	0.300787	1.08441	7.27e-05
					L-G	0.630776	0.238963	1.02259	0.0002821
					I-H	0.246754	-0.14506	0.638567	0.520229
					J-H	0.242089	-0.149725	0.633903	0.547008
					K-H	0.609611	0.217797	1.00142	0.0004508
					L-H	0.547786	0.155972	0.9396	0.0017792
					J-I	-0.00466482	-0.396478	0.387149	1
					K-I	0.362857	-0.0289569	0.75467	0.0874436
					L-I	0.301032	-0.0907814	0.692846	0.252994
					K-J	0.367522	-0.0242921	0.759335	0.0800878
					L-J	0.305697	-0.0861166	0.697511	0.235327
					L-K	-0.0618244	-0.453638	0.329989	0.99998
