# Supplementary material for: The intrinsically disordered cytoplasmic tail of a dendrite branching receptor uses two distinct mechanisms to regulate the actin cytoskeleton
Source: eLife journal article supplement (doi:10.7554/elife.88492), 2023-07-17
Supplement: fig1-data2 [file Figure 1D Source Data 1.xlsx]

## Sheet: Wild Type Gel Quantifcation
replicate 1				replicate 2				replicate 3
	HPO30-GST conc (uM)	WRC intensity	fractional occupancy		HPO30-GST conc (uM)	WRC intensity	fractional occupancy		HPO30-GST conc (uM)	WRC intensity	fractional occupancy
	0	19556.2	0		0	27647.9	0		0	25215.6	0
	0.05	20518.4	-0.0492029		0.05	26565	0.0391657		0.05	23866	0.0535219
	0.1	19694.8	-0.0070891		0.1	26796.2	0.0308045		0.1	24723.7	0.0195069
	0.2	18489.6	0.0545416		0.2	26073.6	0.056938		0.2	23927.2	0.051096
	0.4	18755.2	0.0409574		0.4	26565.6	0.0391445		0.4	23200.2	0.0799281
	0.6	18226.7	0.0679828		0.6	22058.7	0.202155		0.6	21707.2	0.139138
	1.2	11266.2	0.423904		1.2	17601.8	0.363358		1.2	20033.2	0.205525
	2	7183.4	0.632679		2	12128.8	0.561311		2	14574.2	0.422015
	4	1571.35	0.91965		4	5307.19	0.808043		4	6272.99	0.751226
	7	247.213	0.987359		7	1310.4	0.952604		7	3174.34	0.874112
	10	0	1		10	736.598	0.973358		10	899.084	0.964344
	14	0	1		14	247.849	0.991036		14	1063.03	0.957842
	18	0	1		18	0	1		18	0	1

## Sheet: Wild Type Fit Parameters
NOTE: "m" denotes model and "d" denotes data
xm	ym1		xd1	yd1
0	0		0	0				Dynafit Parameters
0.01	0.00573274		0.05	-0.0492029				FIT	STDERR	CV%
0.0107886	0.00618221		0.1	-0.0070891				1.63494	0.185108	11.322
0.0116395	0.00666669		0.2	0.0545416
0.0125574	0.00718889		0.4	0.0409574
0.0135477	0.00775169		0.6	0.0679828
0.0146162	0.0083582		1.2	0.423904
0.0157688	0.00901175		2	0.632679
0.0170124	0.00971594		4	0.91965
0.0183541	0.0104746		7	0.987359
0.0198016	0.0112919		10	1
0.0213632	0.0121722		14	1
0.023048	0.0131202		18	1
0.0248657	0.0141411		0	0
0.0268267	0.0152403		0.05	0.0391657
0.0289423	0.0164236		0.1	0.0308045
0.0312248	0.0176972		0.2	0.056938
0.0336873	0.0190677		0.4	0.0391445
0.036344	0.0205423		0.6	0.202155
0.0392103	0.0221285		1.2	0.363358
0.0423025	0.0238343		2	0.561311
0.0456387	0.0256684		4	0.808043
0.0492379	0.0276398		7	0.952604
0.053121	0.0297582		10	0.973358
0.0573103	0.032034		14	0.991036
0.0618301	0.0344779		18	1
0.0667062	0.0371015		0	0
0.0719669	0.0399169		0.05	0.0535219
0.0776425	0.042937		0.1	0.0195069
0.0837657	0.0461751		0.2	0.051096
0.0903718	0.0496453		0.4	0.0799281
0.0974989	0.0533625		0.6	0.139138
0.105188	0.0573421		1.2	0.205525
0.113484	0.0616		2	0.422015
0.122433	0.066153		4	0.751226
0.132089	0.0710182		7	0.874112
0.142506	0.0762135		10	0.964344
0.153744	0.0817568		14	0.957842
0.165869	0.0876667		18	1
0.17895	0.0939621
0.193063	0.100662
0.208289	0.107785
0.224715	0.11535
0.242437	0.123375
0.261557	0.131879
0.282184	0.140878
0.304438	0.150389
0.328448	0.160426
0.35435	0.171003
0.382296	0.18213
0.412445	0.193818
0.444972	0.206072
0.480064	0.218896
0.517924	0.232291
0.558769	0.246253
0.602836	0.260776
0.650378	0.275849
0.701669	0.291456
0.757006	0.307577
0.816706	0.324189
0.881115	0.341262
0.950603	0.358763
1.02557	0.376654
1.10645	0.394893
1.19371	0.413434
1.28785	0.432227
1.38942	0.451221
1.49899	0.470361
1.61721	0.48959
1.74475	0.50885
1.88234	0.528084
2.03079	0.547234
2.19095	0.566244
2.36374	0.585058
2.55015	0.603624
2.75126	0.621893
2.96824	0.639817
3.20233	0.657355
3.45487	0.674468
3.72734	0.691122
4.02129	0.707288
4.33843	0.722942
4.68057	0.738062
5.0497	0.752633
5.44794	0.766644
5.87758	0.780088
6.34111	0.79296
6.8412	0.805262
7.38072	0.816997
7.96279	0.828171
8.59077	0.838792
9.26827	0.848873
9.9992	0.858426
10.7878	0.867466
11.6385	0.876008
12.5564	0.884071
13.5467	0.891671
14.615	0.898828
15.7676	0.90556
17.0111	0.911886
18.3526	0.917825
19.8	0.923395
19.8	0.923395

## Sheet: Ala#5 Gel Quantification
replicate 1				replicate 2				replicate 3
	HPO30 Ala#5-GST conc (uM)	WRC intensity	fractional occupancy		HPO30 Ala#5-GST conc (uM)	WRC intensity	fractional occupancy		HPO30 Ala#5-GST conc (uM)	WRC intensity	fractional occupancy
	0	30817	0		0	47796.3	-0.151209		0	34321.3	-0.10471
	0.01	30494.6	0.0104642		0.01	44813.2	-0.0793596		0.01	33208.6	-0.0688965
	0.02	30326.9	0.0159049		0.02	41518.3	0		0.02	31068.1	0
	0.04	29753	0.0345262		0.04	37930.7	0.0864114		0.04	32104.8	-0.0333672
	0.08	32013.2	-0.0388141		0.08	39760.2	0.0423469		0.08	35213.6	-0.133432
	0.16	30010.8	0.026161		0.16	45366.2	-0.0926778		0.16	31888.1	-0.026392
	0.32	32294.8	-0.0479542		0.32	29429.2	0.291175		0.32	32716.3	-0.0530502
	0.64	32877.7	-0.0668684		0.64	32092.8	0.227022		0.64	32760.9	-0.0544853
	1.2	28192.3	0.0851705		1.2	35682.5	0.140561		1.2	32858.3	-0.0576192
	2.4	25307.6	0.17878		2.4	25613.7	0.383075		2.4	27889.1	0.102326
	4.8	20176.1	0.345294		4.8	18427.6	0.556158		4.8	19658.6	0.367242
	10	13339	0.567155		10	10910.7	0.737207		10	10754.8	0.653831
	20	6858.47	0.777446		20	3417.75	0.917681		20	4997.01	0.839159
	30	2780.52	0.909773		30	3451.41	0.91687		30	3151.75	0.898554

## Sheet: Ala#5 Fit Parameters
NOTE: "m" denotes model and "d" denotes data
xm	ym1		xd1	yd1
0.002	0.000387752		0.01	0.0104642
0.00220397	0.000427279		0.02	0.0159049
0.00242873	0.000470834		0.04	0.0345262			Dynafit Parameters
0.00267642	0.000518827		0.08	-0.0388141			FIT	STDERR	CV%
0.00294937	0.000571709		0.16	0.026161			5.05598	0.65833	13.0208
0.00325016	0.000629977		0.32	-0.0479542
0.00358162	0.00069418		0.64	-0.0668684
0.00394688	0.000764922		1.2	0.0851705
0.00434939	0.000842866		2.4	0.17878
0.00479296	0.000928746		4.8	0.345294
0.00528176	0.00102337		10	0.567155
0.00582041	0.00112762		20	0.777446
0.00641399	0.00124247		30	0.909773
0.0070681	0.00136902		0.01	0.0624118
0.00778893	0.00150843		0.02	0.131348
0.00858327	0.00166201		0.04	0.206409
0.00945861	0.0018312		0.08	0.168132
0.0104232	0.00201758		0.16	0.0508429
0.0114862	0.00222289		0.32	0.384277
0.0126576	0.00244904		0.64	0.328551
0.0139485	0.00269814		1.2	0.253446
0.015371	0.00297251		2.4	0.464107
0.0169386	0.00327468		4.8	0.614455
0.018666	0.00360746		10	0.771724
0.0205696	0.00397392		20	0.928493
0.0226674	0.00437745		30	0.927789
0.024979	0.00482177		0.01	0.0324186
0.0275265	0.00531094		0.02	0.0947848
0.0303337	0.00584946		0.04	0.0645803
0.0334272	0.00644224		0.08	-0.026
0.0368362	0.00709466		0.16	0.0708943
0.0405929	0.00781265		0.32	0.0467629
0.0447327	0.00860269		0.64	0.0454638
0.0492946	0.00947186		1.2	0.042627
0.0543218	0.0104279		2.4	0.187412
0.0598617	0.0114794		4.8	0.427218
0.0659666	0.0126356		10	0.686642
0.0726941	0.0139067		20	0.854405
0.0801076	0.0153036		30	0.908169
0.0882772	0.0168385
0.09728	0.0185246
0.107201	0.020376
0.118134	0.0224083
0.130181	0.0246383
0.143457	0.0270842
0.158088	0.0297656
0.17421	0.0327037
0.191976	0.0359213
0.211555	0.0394427
0.233129	0.0432942
0.256905	0.0475034
0.283105	0.0521
0.311976	0.0571151
0.343793	0.0625816
0.378854	0.0685338
0.41749	0.0750077
0.460067	0.0820399
0.506986	0.0896686
0.55869	0.097932
0.615666	0.106869
0.678454	0.116517
0.747645	0.126915
0.823892	0.138096
0.907914	0.150096
1.00051	0.162944
1.10254	0.176665
1.21498	0.19128
1.33889	0.206804
1.47543	0.223243
1.6259	0.240595
1.79171	0.258851
1.97444	0.277987
2.1758	0.297974
2.39769	0.318766
2.64221	0.340309
2.91168	0.362537
3.20862	0.38537
3.53584	0.408723
3.89644	0.432497
4.2938	0.456587
4.7317	0.480884
5.21425	0.505272
5.74602	0.529634
6.33201	0.553856
6.97777	0.577823
7.68938	0.601428
8.47357	0.624568
9.33772	0.64715
10.29	0.669092
11.3394	0.690318
12.4958	0.710769
13.7702	0.730393
15.1745	0.749153
16.7221	0.76702
18.4274	0.783979
20.3067	0.800022
22.3777	0.815152
24.6598	0.829379
27.1747	0.84272
29.946	0.855198
33	0.86684
