# Supplementary material for: The intrinsically disordered cytoplasmic tail of a dendrite branching receptor uses two distinct mechanisms to regulate the actin cytoskeleton
Source: eLife journal article supplement (doi:10.7554/elife.88492), 2023-07-17
Supplement: fig1-figsupp3-data1 [file AlphaFold_Backbone_RMSD.xlsx]

## Sheet: Sheet1
0	0.0005078
1	0.538146
2	0.633965
3	0.502496
4	0.524215
5	0.903269
6	0.901825
7	0.865149
8	0.972404
9	1.09943
10	1.15042
11	1.42027
12	1.31023
13	1.07717
14	1.22169
15	1.08435
16	1.34075
17	1.24068
18	0.938785
19	1.13202
20	1.04321
21	0.989809
22	1.13437
23	1.16597
24	1.16926
25	0.990446
26	1.05995
27	1.1165
28	1.0202
29	0.887863
30	1.00318
31	1.0208
32	1.10257
33	1.13913
34	1.19092
35	1.14651
36	1.20566
37	1.23394
38	1.28453
39	1.10806
40	1.13296
41	1.13122
42	1.04362
43	1.01434
44	1.05381
45	0.94778
46	1.12387
47	1.01777
48	0.968192
49	0.980542
50	0.963925
51	0.981189
52	1.05543
53	0.935143
54	0.935426
55	1.00478
56	0.986058
57	0.932858
58	0.962458
59	1.02204
60	1.21351
61	1.19302
62	1.04056
63	0.947336
64	0.990855
65	0.974868
66	1.03308
67	1.0048
68	1.05704
69	1.08148
70	1.06116
71	0.981199
72	1.00722
73	0.958581
74	0.996666
75	1.02786
76	1.01414
77	1.05339
78	1.03815
79	0.918699
80	0.937295
81	0.940757
82	0.922224
83	0.957765
84	0.921471
85	0.930895
86	0.940442
87	0.954767
88	0.934459
89	0.899418
90	0.902218
91	0.904633
92	0.930825
93	1.00614
94	0.948899
95	0.897339
96	0.952541
97	0.975247
98	1.04645
99	0.998712
100	1.01631
101	1.01132
102	0.989409
103	1.05738
104	0.945156
105	0.920957
106	0.972015
107	0.972259
108	1.00184
109	1.09892
110	1.1714
111	1.30693
112	1.20305
113	1.12089
114	1.13649
115	1.13446
116	1.09432
117	1.1294
118	1.12411
119	1.03268
120	1.05623
121	0.964731
122	0.921196
123	0.953404
124	1.02074
125	1.01138
126	0.964427
127	0.990919
128	1.01192
129	1.00131
130	0.88032
131	0.883184
132	0.940691
133	0.998148
134	1.0832
135	1.05522
136	1.06163
137	1.05075
138	1.07446
139	1.10391
140	1.13007
141	1.03347
142	1.07135
143	1.07441
144	1.20389
145	1.16558
146	1.09329
147	1.09964
148	1.16743
149	1.15299
150	1.19966
151	1.31396
152	1.05752
153	1.0725
154	0.981947
155	1.11304
156	1.01895
157	1.03679
158	1.16322
159	1.16881
160	1.06967
161	1.06084
162	1.007
163	1.03289
164	1.04072
165	1.23502
166	0.978318
167	0.904579
168	0.815091
169	0.960117
170	0.837695
171	0.744606
172	1.13353
173	1.09728
174	1.05983
175	1.19677
176	1.21493
177	1.33949
178	1.20696
179	1.2872
180	1.18051
181	1.25689
182	0.808484
183	0.50043
184	0.508846
185	0.743603
186	0.959334
187	0.748382
188	0.845467
189	0.837868
190	0.934472
191	1.22636
192	1.42417
193	1.08439
194	1.12331
195	1.34117
196	1.12476
197	1.05001
198	1.20119
199	1.00086
200	1.27667
