# Supplementary material for: The intrinsically disordered cytoplasmic tail of a dendrite branching receptor uses two distinct mechanisms to regulate the actin cytoskeleton
Source: eLife journal article supplement (doi:10.7554/elife.88492), 2023-07-17
Supplement: fig1-figsupp3-data1 [file AlphaFold_FL_RMSD_Backbone.xlsx]

## Sheet: Sheet1
0	0.0004934
1	0.912389
2	0.708264
3	0.870751
4	0.731501
5	0.793361
6	0.901665
7	1.2383
8	1.33767
9	1.47067
10	1.52783
11	1.59722
12	1.56135
13	1.53747
14	1.33662
15	1.11299
16	1.29945
17	1.46801
18	1.17822
19	1.27234
20	1.44612
21	1.47394
22	1.61337
23	1.69312
24	1.82475
25	1.67766
26	1.645
27	1.57375
28	1.492
29	1.60722
30	1.39951
31	1.42822
32	1.52981
33	1.65165
34	1.65645
35	1.67703
36	1.42411
37	1.4743
38	1.43934
39	1.39973
40	1.31527
41	1.26994
42	1.25201
43	1.49291
44	1.65176
45	1.47968
46	1.60355
47	1.61066
48	1.37724
49	1.52112
50	1.43263
51	1.41256
52	1.38716
53	1.25439
54	1.28225
55	1.28111
56	1.34397
57	1.62303
58	1.31003
59	1.18177
60	1.53759
61	1.58959
62	1.35331
63	1.10767
64	1.13259
65	1.38769
66	1.42899
67	1.59002
68	1.47032
69	1.48693
70	1.48867
71	1.50687
72	1.50894
73	1.47345
74	1.29213
75	1.13888
76	1.45424
77	1.50896
78	1.70086
79	1.6743
80	1.62416
81	1.67143
82	1.58851
83	1.5559
84	1.61222
85	1.55207
86	1.4169
87	1.42808
88	1.72348
89	1.40796
90	1.4125
91	1.30304
92	1.40381
93	1.16121
94	1.13817
95	1.5206
96	1.26661
97	1.30749
98	1.35
99	1.46972
100	1.67122
101	1.69723
102	1.57093
103	1.52001
104	1.38521
105	1.46499
106	1.392
107	1.23382
108	1.24034
109	1.47514
110	1.49
111	1.27376
112	1.65857
113	1.43225
114	1.51128
115	1.57531
116	1.74172
117	1.5467
118	1.64052
119	1.31069
120	1.43387
121	1.19442
122	1.17503
123	1.35172
124	1.39986
125	1.26203
126	1.07112
127	1.32317
128	1.31111
129	1.58069
130	1.49266
131	1.49616
132	1.43704
133	1.4914
134	1.29148
135	1.45544
136	1.51237
137	1.53964
138	1.51906
139	1.37713
140	1.71164
141	1.75318
142	1.66926
143	1.4946
144	1.70436
145	1.57322
146	1.72198
147	1.91401
148	1.99261
149	1.73479
150	1.83765
151	1.7981
152	1.73495
153	1.72345
154	1.7239
155	1.54689
156	1.56679
157	1.60913
158	1.55108
159	1.45138
160	1.55979
161	1.39306
162	1.32976
163	1.49163
164	1.20058
165	1.35616
166	1.57785
167	1.68116
168	1.39102
169	1.10091
170	1.14556
171	1.03218
172	1.28279
173	1.32929
174	1.46186
175	1.58557
176	1.49241
177	1.15338
178	1.22752
179	1.05601
180	1.54841
181	1.70785
182	1.67365
183	1.3603
184	1.37409
185	1.3183
186	1.42793
187	1.50372
188	1.5411
189	1.54371
190	1.59719
191	1.78266
192	1.71101
193	1.55869
194	1.29835
195	1.58514
196	1.71705
197	1.5938
198	1.4529
199	1.39625
200	1.53354
201	1.63462
202	1.90112
203	1.40837
204	1.46538
205	1.59294
206	1.33438
207	1.31374
208	1.43926
209	1.39949
210	1.2685
211	1.46224
212	1.358
213	1.68954
214	1.36587
215	1.29097
216	1.55114
217	1.56953
218	1.35039
219	1.29511
220	1.49356
221	1.17697
222	1.50883
223	1.69936
224	1.57836
225	1.42508
226	1.61265
227	1.81482
228	1.84285
229	1.60622
230	1.56666
231	1.84619
232	1.52976
233	1.76571
234	1.70734
235	1.87918
236	1.80798
237	1.78826
238	1.81031
239	1.7845
240	1.73826
241	1.56437
242	1.59807
243	1.41459
244	1.2154
245	1.3753
