# Supplementary material for: The intrinsically disordered cytoplasmic tail of a dendrite branching receptor uses two distinct mechanisms to regulate the actin cytoskeleton
Source: eLife journal article supplement (doi:10.7554/elife.88492), 2023-07-17
Supplement: fig1-figsupp3-data1 [file RaptorX_RMSD_backbone.xlsx]

## Sheet: Sheet1
0	0.0004909
1	0.566566
2	0.531923
3	0.580196
4	0.556047
5	0.591297
6	0.609884
7	0.666735
8	0.675889
9	0.662042
10	0.654994
11	0.654668
12	0.601059
13	0.570164
14	0.540257
15	0.580216
16	0.571603
17	0.710156
18	0.873177
19	0.832185
20	0.868568
21	0.926899
22	0.91616
23	0.956017
24	0.932297
25	0.933016
26	0.980031
27	0.932184
28	1.11955
29	1.03339
30	1.10439
31	1.00609
32	0.995919
33	1.05047
34	0.977566
35	0.860443
36	0.969352
37	0.907042
38	0.853869
39	0.938962
40	0.965994
41	0.942557
42	0.944128
43	0.987368
44	1.04622
45	1.06372
46	1.02113
47	0.974302
48	0.96114
49	0.927312
50	0.983879
51	0.916891
52	0.880481
53	0.903408
54	0.916018
55	0.929981
56	1.00899
57	0.976486
58	0.914011
59	1.02994
60	1.00245
61	0.967878
62	0.981613
63	0.969402
64	1.02107
65	1.03945
66	1.03551
67	0.933291
68	0.903019
69	0.772806
70	0.668676
71	0.708628
72	0.694601
73	0.782039
74	0.858436
75	0.87291
76	0.823466
77	0.6724
78	0.689123
79	0.746132
80	0.900502
81	0.842566
82	0.851347
83	0.703402
84	0.760304
85	0.765045
86	0.730846
87	0.68345
88	0.623603
89	0.649034
90	0.611798
91	0.669324
92	0.665269
93	0.584404
94	0.60316
95	0.780964
96	0.87707
97	0.880413
98	0.849472
99	0.85038
100	0.902906
101	0.817585
102	1.0077
103	0.823554
104	0.862547
105	0.910768
106	0.849827
107	0.789252
108	0.727483
109	0.825081
110	0.978547
111	0.743216
112	0.631309
113	0.710471
114	0.79839
115	0.706466
116	0.835666
117	0.786977
118	0.874537
119	0.646768
120	0.685316
121	0.765025
122	0.735991
123	0.840926
124	0.750203
125	0.658634
126	0.651818
127	0.619619
128	0.6489
129	0.632251
130	0.665315
131	0.61036
132	0.564564
133	0.692835
134	0.64528
135	0.673466
136	0.848675
137	0.739529
138	0.722027
139	0.624282
140	0.840511
141	0.745184
142	0.811217
143	0.899742
144	1.01259
145	0.97169
146	1.07208
147	0.9768
148	0.964926
149	0.970472
150	0.995502
151	1.00884
152	0.980256
153	1.01613
154	1.13416
155	1.10481
156	1.24398
157	1.23601
158	1.26209
159	1.30552
160	1.34634
161	1.30236
162	1.3666
163	1.46775
164	1.47428
165	1.3778
166	1.22444
167	1.2664
168	1.27923
169	1.37172
170	1.18376
171	1.22992
172	1.49253
173	1.48565
174	1.46515
175	1.50054
176	1.42364
177	1.36137
178	1.44641
179	1.34587
180	1.39474
181	1.34369
182	1.32441
183	1.23597
184	1.30039
185	1.26805
186	1.19747
187	1.25346
188	1.26776
189	1.27753
190	1.32105
191	1.28873
192	1.23066
193	1.25097
194	1.2291
195	1.27598
196	1.21892
197	1.23746
198	1.20919
199	1.23863
200	1.18149
201	1.20817
202	1.18269
