# Supplementary material for: The intrinsically disordered cytoplasmic tail of a dendrite branching receptor uses two distinct mechanisms to regulate the actin cytoskeleton
Source: eLife journal article supplement (doi:10.7554/elife.88492), 2023-07-17
Supplement: fig1-figsupp3-data1 [file Rosetta_FL_RMSD_Backbone.xlsx]

## Sheet: Sheet1
0	0.0005125
1	0.287934
2	0.412366
3	0.4867
4	0.41976
5	0.451187
6	0.509296
7	0.492316
8	0.468729
9	0.453058
10	0.447644
11	0.452706
12	0.484858
13	0.407553
14	0.42637
15	0.429124
16	0.561481
17	0.469881
18	0.439485
19	0.537109
20	0.574518
21	0.5301
22	0.468803
23	0.494303
24	0.503267
25	0.589831
26	0.666017
27	0.61531
28	0.669019
29	0.62688
30	0.629014
31	0.549698
32	0.591313
33	0.605212
34	0.58034
35	0.662201
36	0.701227
37	0.729509
38	0.711222
39	0.686313
40	0.737299
41	0.556095
42	0.550673
43	0.64825
44	0.659617
45	0.599053
46	0.515239
47	0.713604
48	0.660497
49	0.640482
50	0.708926
51	0.599592
52	0.577595
53	0.60207
54	0.61741
55	0.651386
56	0.672777
57	0.679259
58	0.663241
59	0.765027
60	0.750374
61	0.762014
62	0.72631
63	0.920551
64	0.862572
65	0.969318
66	0.903853
67	0.819566
68	0.931796
69	0.963298
70	1.05722
71	1.08928
72	1.11138
73	1.0757
74	1.12532
75	1.22425
76	1.25794
77	1.19508
78	1.22141
79	0.982169
80	1.0791
81	1.20603
82	1.24406
83	1.28457
84	1.24697
85	1.24509
86	1.15446
87	1.26692
88	1.09412
89	0.879755
90	0.747537
91	0.901058
92	1.05607
93	0.835414
94	0.924912
95	0.776147
96	0.70679
97	0.743732
98	0.762489
99	0.790756
100	0.929915
101	0.996
102	1.06746
103	0.92202
104	1.08435
105	1.07496
106	0.926513
107	1.0681
108	0.960456
109	0.986799
110	1.0461
111	1.01878
112	1.01369
113	0.923383
114	0.820656
115	0.866283
116	0.86921
117	0.840766
118	0.918236
119	0.920795
120	0.911581
121	0.900833
122	0.915514
123	1.09371
124	0.999971
125	1.07168
126	1.02667
127	0.963464
128	0.918005
129	0.738928
130	0.898452
131	1.01084
132	0.919436
133	1.00106
134	1.03157
135	0.760293
136	0.933281
137	1.06031
138	0.971731
139	0.960172
140	0.890415
141	1.03682
142	1.01789
143	0.990705
144	1.07004
145	1.03708
146	0.953034
147	1.2233
148	1.13252
149	1.27539
150	1.26101
151	1.28118
152	1.26727
153	1.05944
154	0.988927
155	0.991896
156	0.821429
157	0.774561
158	0.832326
159	0.981402
160	0.927962
161	0.812709
162	0.818753
163	0.794964
164	0.836975
165	0.849815
166	0.943822
167	0.932778
168	0.869756
169	0.813698
170	0.835304
171	0.815693
172	0.875833
173	0.847798
174	0.853031
175	0.894322
176	0.871623
177	0.874925
178	0.879302
179	0.862882
180	0.835693
181	0.87076
182	0.892741
183	0.867286
184	0.839828
185	0.803472
186	0.855028
187	0.818745
188	0.829771
189	0.828968
190	0.823739
191	0.790282
192	0.822191
193	0.803763
194	0.765162
195	0.756367
196	0.715399
197	0.776807
198	0.732262
199	0.759434
200	0.771295
