# Supplementary material for: The intrinsically disordered cytoplasmic tail of a dendrite branching receptor uses two distinct mechanisms to regulate the actin cytoskeleton
Source: eLife journal article supplement (doi:10.7554/elife.88492), 2023-07-17
Supplement: fig1-figsupp3-data1 [file Rosetta_RMSD_backbone.xlsx]

## Sheet: Sheet1
0	0.000506
1	0.189116
2	0.257742
3	0.343053
4	0.27323
5	0.339695
6	0.348414
7	0.319201
8	0.379243
9	0.414456
10	0.396182
11	0.389612
12	0.293217
13	0.385837
14	0.426594
15	0.42467
16	0.455252
17	0.621136
18	0.471126
19	0.343294
20	0.355951
21	0.359159
22	0.368291
23	0.411178
24	0.373258
25	0.435641
26	0.40032
27	0.617114
28	0.598064
29	0.719781
30	0.741052
31	0.737997
32	0.714306
33	0.728738
34	0.767943
35	0.779967
36	0.768998
37	0.808771
38	0.745708
39	0.787442
40	0.79169
41	0.741587
42	0.760061
43	0.698351
44	0.771321
45	0.753923
46	0.662014
47	0.69817
48	0.697487
49	0.70699
50	0.762702
51	0.716365
52	0.7174
53	0.66562
54	0.718012
55	0.715408
56	0.712134
57	0.707145
58	0.696615
59	0.71942
60	0.769329
61	0.716272
62	0.55964
63	0.652172
64	0.687127
65	0.641411
66	0.682886
67	0.708573
68	0.871047
69	1.05976
70	0.81449
71	0.941716
72	0.932442
73	0.919269
74	0.971475
75	0.91035
76	0.697589
77	0.951903
78	0.949809
79	1.01021
80	0.921477
81	0.981758
82	0.853588
83	0.89791
84	0.910578
85	0.900609
86	0.93092
87	0.861483
88	0.920596
89	1.00905
90	1.04989
91	1.06519
92	0.986989
93	1.01426
94	1.03554
95	0.983268
96	1.01519
97	1.028
98	0.954685
99	1.00954
100	0.937007
101	0.913941
102	0.907315
103	0.821457
104	0.72573
105	0.690176
106	0.803598
107	0.767592
108	0.817966
109	0.840543
110	0.89791
111	0.85348
112	0.925679
113	0.907245
114	0.868755
115	1.00979
116	0.909303
117	0.925286
118	0.899093
119	0.892225
120	0.772895
121	0.909309
122	0.880206
123	0.95978
124	0.958596
125	0.908032
126	0.88395
127	0.864345
128	0.844162
129	0.840644
130	0.658943
131	0.830585
132	0.645657
133	0.720088
134	0.827394
135	0.84428
136	0.92018
137	0.966879
138	1.00653
139	0.948874
140	0.618202
141	0.65697
142	0.80026
143	1.03425
144	0.919931
145	1.04866
146	0.886834
147	0.83445
148	0.932368
149	1.00436
150	1.038
151	1.02013
152	1.00679
153	0.74249
154	0.788875
155	0.721867
156	0.969761
157	0.73274
158	0.79928
159	0.773592
160	0.857477
161	0.779451
162	0.75766
163	0.697613
164	0.676975
165	0.811782
166	0.740476
167	0.837954
168	0.904256
169	0.823399
170	1.00049
171	0.840044
172	0.936484
173	1.04962
174	0.942328
175	0.908716
176	0.961279
177	0.967188
178	0.991173
179	0.922632
180	1.04679
181	1.21428
182	1.3554
183	1.27516
184	1.13418
185	1.29531
186	1.35811
187	1.21382
188	1.22456
189	1.45042
190	1.41661
191	1.39874
192	1.23619
193	1.06632
194	1.01359
195	1.2086
196	1.40358
197	1.24994
198	1.27161
199	1.276
200	1.35597
