# Supplementary material for: The intrinsically disordered cytoplasmic tail of a dendrite branching receptor uses two distinct mechanisms to regulate the actin cytoskeleton
Source: eLife journal article supplement (doi:10.7554/elife.88492), 2023-07-17
Supplement: fig1-figsupp3-data1 [file RosettaFold_RMSD.xlsx]

## Sheet: Sheet1
0	0.0004886
1	0.262665
2	0.282651
3	0.465323
4	0.578687
5	0.757918
6	0.752983
7	0.744637
8	0.779941
9	0.779374
10	0.688744
11	0.743905
12	0.791177
13	0.856795
14	0.809691
15	0.883831
16	0.919243
17	0.945636
18	0.966987
19	1.01739
20	1.03823
21	1.00862
22	1.1001
23	1.20355
24	1.27094
25	1.28148
26	1.53382
27	1.45006
28	1.34329
29	1.44129
30	1.453
31	1.50262
32	1.32055
33	1.45787
34	1.61526
35	1.53169
36	1.5132
37	1.53526
38	1.59504
39	1.5381
40	1.45142
41	1.40425
42	1.35893
43	1.36279
44	1.41968
45	1.36722
46	1.43729
47	1.41898
48	1.39824
49	1.55339
50	1.46496
51	1.48181
52	1.35333
53	1.44924
54	1.45868
55	1.43845
56	1.52888
57	1.42563
58	1.53151
59	1.45986
60	1.55163
61	1.42311
62	1.47528
63	1.5252
64	1.599
65	1.60078
66	1.56896
67	1.42654
68	1.55596
69	1.42901
70	1.39202
71	1.31984
72	1.40833
73	1.27057
74	1.52295
75	1.56091
76	1.30364
77	1.33206
78	1.39176
79	1.38402
80	1.40246
81	1.52448
82	1.52666
83	1.36529
84	1.44989
85	1.46195
86	1.54084
87	1.53197
88	1.47504
89	1.2155
90	1.26713
91	1.16436
92	1.35416
93	1.24406
94	1.10307
95	1.08536
96	1.09285
97	1.09673
98	1.34533
99	1.2117
100	1.00974
101	1.00331
102	0.990246
103	0.813613
104	0.939315
105	1.06516
106	1.35312
107	1.43027
108	1.51312
109	1.5976
110	1.46661
111	1.35545
112	1.10837
113	1.28332
114	1.30583
115	1.53511
116	1.4007
117	1.36318
118	1.26938
119	1.35838
120	1.13357
121	1.29954
122	1.46918
123	1.36386
124	1.24059
125	1.31871
126	1.48545
127	1.58798
128	1.54795
129	1.51286
130	1.26364
131	1.42346
132	1.44106
133	1.37406
134	1.34267
135	1.41559
136	1.51823
137	1.44618
138	1.37642
139	1.50344
140	1.56687
141	1.591
142	1.58071
143	1.59641
144	1.49661
145	1.49511
146	1.37016
147	1.39562
148	1.38145
149	1.3593
150	1.48729
151	1.4451
152	1.47048
153	1.48745
154	1.52787
155	1.46075
156	1.46281
157	1.42128
158	1.52052
159	1.53373
160	1.5426
161	1.54339
162	1.45924
163	1.49351
164	1.54734
165	1.58621
166	1.47112
167	1.61256
168	1.57
169	1.59077
170	1.62189
171	1.59915
172	1.52383
173	1.46779
174	1.4469
175	1.48652
176	1.47575
177	1.4563
178	1.46481
179	1.41331
180	1.40517
181	1.44104
182	1.44588
183	1.47627
184	1.56344
185	1.59887
186	1.49467
187	1.48522
188	1.38534
189	1.55559
190	1.40352
191	1.48942
192	1.45736
193	1.35973
194	1.47527
195	1.4174
196	1.41717
197	1.35607
198	1.28084
199	1.14404
200	1.15791
