# Supplementary material for: The intrinsically disordered cytoplasmic tail of a dendrite branching receptor uses two distinct mechanisms to regulate the actin cytoskeleton
Source: eLife journal article supplement (doi:10.7554/elife.88492), 2023-07-17
Supplement: fig2-data1 [file Figure 2A Source Data 1.xlsx]

## Sheet: Sheet1
wavelength	BSA - degrees	molar ellipticity		HPO30 - degrees	molar ellipticity
190	-0.0047456	-270.357		0.00895284	520.594
191	0.0123022	700.856		-0.00269441	-156.676
192	0.0244497	1392.9		-0.0122141	-710.232
193	0.0316969	1805.77		-0.0196061	-1140.07
194	0.0363858	2072.9		-0.025601	-1488.66
195	0.0325722	1855.64		-0.0283151	-1646.48
196	0.0241022	1373.1		-0.0299355	-1740.7
197	0.0160449	914.078		-0.0292682	-1701.9
198	0.00947046	539.532		-0.0287688	-1672.86
199	0.00230681	131.419		-0.029032	-1688.17
200	-0.00512709	-292.09		-0.0276726	-1609.12
201	-0.0115273	-656.71		-0.0264919	-1540.46
202	-0.0177775	-1012.78		-0.0250712	-1457.85
203	-0.0235184	-1339.84		-0.0236888	-1377.47
204	-0.0279148	-1590.31		-0.0222093	-1291.44
205	-0.0316095	-1800.79		-0.0208284	-1211.14
206	-0.034364	-1957.72		-0.019133	-1112.56
207	-0.0360035	-2051.12		-0.0175	-1017.6
208	-0.0368908	-2101.67		-0.0159161	-925.497
209	-0.0369453	-2104.77		-0.0144889	-842.508
210	-0.0366413	-2087.45		-0.0133152	-774.259
211	-0.0361985	-2062.23		-0.0123094	-715.773
212	-0.0357939	-2039.18		-0.0114786	-667.463
213	-0.0353811	-2015.66		-0.0108537	-631.126
214	-0.0350287	-1995.59		-0.0102943	-598.598
215	-0.0348671	-1986.38		-0.00983978	-572.168
216	-0.034822	-1983.81		-0.00951868	-553.497
217	-0.0348961	-1988.03		-0.00925904	-538.399
218	-0.0351224	-2000.92		-0.00904179	-525.767
219	-0.0353713	-2015.1		-0.00888387	-516.584
220	-0.0355126	-2023.15		-0.00871221	-506.602
221	-0.0355093	-2022.96		-0.00858649	-499.292
222	-0.0352048	-2005.62		-0.00838722	-487.704
223	-0.0344592	-1963.14		-0.00810505	-471.296
224	-0.0335205	-1909.66		-0.00780087	-453.609
225	-0.032306	-1840.47		-0.00751597	-437.042
226	-0.0308918	-1759.91		-0.00722355	-420.039
227	-0.0292674	-1667.36		-0.00696408	-404.951
228	-0.0273804	-1559.86		-0.00663103	-385.584
229	-0.0252155	-1436.53		-0.00629097	-365.81
230	-0.0231174	-1317		-0.00597154	-347.236
231	-0.0209344	-1192.63		-0.00564651	-328.336
232	-0.0188071	-1071.44		-0.00527289	-306.611
233	-0.016804	-957.324		-0.00491656	-285.891
234	-0.01483	-844.865		-0.00452803	-263.298
235	-0.0129842	-739.71		-0.00416041	-241.922
236	-0.0113977	-649.327		-0.00384827	-223.771
237	-0.00997232	-568.123		-0.00358747	-208.606
238	-0.00873589	-497.684		-0.00333658	-194.017
239	-0.00773353	-440.579		-0.00312522	-181.727
240	-0.00686694	-391.21		-0.00292589	-170.136
241	-0.00610902	-348.031		-0.00269975	-156.986
242	-0.00549339	-312.958		-0.00253748	-147.551
243	-0.00503227	-286.688		-0.00239974	-139.541
244	-0.00467312	-266.228		-0.00226845	-131.907
245	-0.00439813	-250.561		-0.00217745	-126.615
246	-0.00419218	-238.828		-0.00210376	-122.33
247	-0.00401261	-228.598		-0.00204793	-119.084
248	-0.00388245	-221.183		-0.00202101	-117.519
249	-0.00381959	-217.602		-0.00199629	-116.081
250	-0.00373244	-212.637		-0.00196071	-114.012
251	-0.00364962	-207.919		-0.00193715	-112.642
252	-0.00357161	-203.475		-0.00190454	-110.746
253	-0.0035274	-200.956		-0.00185392	-107.803
254	-0.00352202	-200.649		-0.00179137	-104.165
255	-0.0035026	-199.543		-0.00173155	-100.687
256	-0.00343376	-195.621		-0.00167125	-97.1807
257	-0.00338088	-192.609		-0.00166212	-96.6498
258	-0.00332694	-189.536		-0.00165558	-96.2695
259	-0.00327348	-186.49		-0.00166645	-96.9016
260	-0.00322049	-183.471		-0.00169474	-98.5466
