# Supplementary material for: The intrinsically disordered cytoplasmic tail of a dendrite branching receptor uses two distinct mechanisms to regulate the actin cytoskeleton
Source: eLife journal article supplement (doi:10.7554/elife.88492), 2023-07-17
Supplement: fig2-data3 [file EXP-DAK220927 HPO30 3D NMR Assignment.xlsx]

## Sheet: Picked Peaks
Peak	CA(intra)	N (intra)	H (intra)	CA(inter)	N (inter)	H (inter)		Peak	CB (intra)	N (intra)	H (intra)	CB (inter)	N (inter)	H (inter)		Peak	CO	N	H
1?-?	45.635	109.264	8.345	53.628	109.269	8.345		1?-?				38.705	109.251	8.343		1	175.762	109.267	8.347			highly confident
2?-?	45.31	111.562	8.366	61.843	111.561	8.367		2?-?				70.009	111.6	8.364		2	175.057	111.56	8.369			medium confident
3?-?	61.834	114.642	8.026	56.529	114.645	8.027		3?-?	69.948	114.627	8.024	33.037	114.6	8.021		3	176.761	114.637	8.027			not very confident
4?-?	62.512	115.526	8.1	56.38	115.562	8.099		4?-?	69.444	115.5	8.093	29.114	115.5	8.089		4	176.549	115.496	8.097
5?-?	61.948	116.465	8.238	55.544	116.5	8.243		5?-?				44.666	116.436	8.272		5	176.249	116.484	8.244
6?-?	59.051	116.948	8.278	54.578	116.948	8.277		6?-?	63.747	116.9	8.276	41.023	116.9	8.27		6	176.721	116.946	8.279
7?-?	58.653	117.4	8.321	56.085	117.4	8.317		7?-?	66.907	117.4	8.245					7	175.962	117.344	8.32				Assignment	User	w1	w2	w3
8?-?	56.205	118.8	8.332	52.967	118.8	8.338		8?-?	43.323	118.831	8.285					8	174.747	118.8	8.331
9?-?	58.573	118.721	8.289	59.046	118.7	8.288		9?-?	64.308	118.7	8.288	63.829	118.87	8.289		9	174.758	118.8	8.292					1	175.762	109.267	8.347
10?-?	53.749	120.2	8.355	53.333	120.2	8.356		10?-?	38.668	120	8.35					10	175.152	120.2	8.361					2	175.057	111.56	8.369
11?-?	53.395	120	8.276	56.47	120	8.276		11?-?								11	176.095	120	8.281					3	176.761	114.637	8.027
12?-?	57.649	120.3	8.122	63.253	120.273	8.122		12?-?	39.431	120.3	8.122	32.04	120.3	8.122		12	176.271	120.3	8.123					4	176.549	115.496	8.097
13?-?	56.116	120.7	8.231	56.734	120.7	8.228		13?-?	30.231	120.7	8.227					13	176.386	120.7	8.23					5	176.249	116.484	8.244
14?-?	62.553	120.407	8.068	54.539	120.4	8.068		14?-?	32.722	120.4	8.08	41.132	120.4	8.072										6	176.721	116.946	8.279
15?-?	62.623	120.7	8.075	54.473	120.578	8.076		15?-?	32.597	120.7	8.079	41.272	120.7	8.081		15	176.406	120.7	8.08					7	175.962	117.344	8.32
16?-?	56.072	121.438	8.159	45.293	121.429	8.158		16?-?	31.041	121.4	8.157					16	173.901	121.5	8.16					8	174.747	118.8	8.331
17?-?	57.232	121.9	7.965	56.89	121.9	7.963		17?-?	29.608	121.9	7.965	32.788	121.9	7.965		17	176.395	121.9	7.965					9	174.758	118.8	8.292
18?-?	55.357	122.1	7.909	45.62	122.1	7.908		18?-?	42.498	122.1	7.908	47.078	122.1	7.908		18	174.042	122.1	7.912					10	175.152	120.2	8.361
19?-?	56.742	121.9	8.441	57.022	121.9	8.441		19?-?	30.107	121.9	8.439	33.037	121.9	8.439		19	176.638	121.9	8.447					11	176.095	120	8.281
20?-?	54.473	122	8.355	54.38	122	8.353		20?-?	40.739	122	8.354	41.381	122	8.354		20	176.16	122	8.356					12	176.271	120.3	8.123
21?-?	56.466	121.8	8.368	57.05	121.8	8.367		21?-?	29.266	121.8	8.369	30.033	121.8	8.367		21	176.788	121.8	8.37					13	176.386	120.7	8.23
22?-?	54.231	121.8	8.257	54.34	121.8	8.256		22?-?	41.424	121.8	8.259	41.303	121.8	8.257		22	175.772	121.8	8.259
23?-?	57.077	122.3	8.323	56.341	122.3	8.325		23?-?	29.905	122.3	8.32	30.966	122.3	8.322		23	176.221	122.3	8.326					15	176.406	120.7	8.08
24?-?	62.288	122	8.199	56.1	122	8.199		24?-?	32.816	122	8.2	30.889	122	8.198		24	176.295	122	8.199					16	173.901	121.5	8.16
25?-?	56.1	122.2	8.201	45.491	122.2	8.2		25?-?	41.346	122.2	8.257	41.35	122	8.257		25	175.081	122.2	8.228					17	176.395	121.9	7.965
26?-?	58.536	122.5	8.185	56.789	122.5	8.186		26?-?	38.684	122.5	8.184	30.172	122.5	8.184		26	176.339	122.5	8.185					18	174.042	122.1	7.912
27?-?	52.959	123.308	8.51	62.331	123.3	8.51		27?-?	38.918	123.4	8.509	32.85	123.4	8.509		27	175.695	123.3	8.513					19	176.638	121.9	8.447
28?-?	58.964	123.2	8.428	62.599	123.2	8.427		28?-?	27.865	123.2	8.432	32.694	123.2	8.43		28	176.292	123.3	8.431					20	176.16	122	8.356
29?-?	56.473	123.3	8.37	54.998	123.3	8.371		29?-?	33.033	123.3	8.367	42.393	123.3	8.369		29	177.293	123.3	8.373					21	176.788	121.8	8.37
30?-?	57.163	123.6	8.339	56.408	123.6	8.338		30?-?	32.908	123.6	8.338	30.702	123.6	8.338		30	176.512	123.6	8.342					22	175.772	121.8	8.259
31?-?	56.645	124.1	8.362	58.392	124.1	8.353		31?-?								31	174.644	124.1	8.355					23	176.221	122.3	8.326
32?-?	61.093	123	8.082	55.376	123	8.08		32?-?	38.295	123	8.083	42.44	123	8.081		32	177.194	123	8.084					24	176.295	122	8.199
33?-?	56.504	123.1	7.993	57.244	123.1	7.991		33?-?	33.158	123.1	7.996	29.628	123.1	7.99		33	176.268	123.2	7.993					25	175.081	122.2	8.228
34?-?	61.984	123	7.911	57.653	123	7.912		34?-?	33.345	123	7.91	39.497	123	7.91		34	175.24	123	7.911					26	176.339	122.5	8.185
35?-?	56.629	123.6	8.12	62.549	123.6	8.119		35?-?	32.8	123.6	8.12	69.589	123.6	8.12		35	174.805	123.6	8.125					27	175.695	123.3	8.513
36?-?	53.804	124	8.134	56.221	124	8.133		36?-?	30.262	124	8.132	30.422	124	8.136		36	174.817	124	8.13					28	176.292	123.3	8.431
37?-?	54.309	125.6	8.373	60.754	125.6	8.372		37?-?	41.346	125.6	8.373	38.921	125.6	8.371		37	175.645	125.7	8.375					29	177.293	123.3	8.373
38?-?	52.944	125.7	8.203	56.073	125.7	8.202		38?-?								38	175.167	125.7	8.203					30	176.512	123.6	8.342
39?-?	62.249	126.1	8.238	61.996	126.1	8.239		39?-?	32.691	126.1	8.239	33.426	126.1	8.241		39	175.187	126	8.245					31	174.644	124.1	8.355
40?-?	60.738	126.4	8.275	62.311	126.4	8.275		40?-?	38.856	126.4	8.274	32.834	126.4	8.276		40	175.819	126.5	8.275					32	177.194	123	8.084
41?-?	55.035	127.328	8.265	61.073	127.3	8.264		41?-?	42.482	127.3	8.27	38.393	127.3	8.262		41	176.124	127.4	8.269					33	176.268	123.2	7.993
42?-?	57.276	127.785	7.896	58.633	127.8	7.894		42?-?	33.718	127.8	7.895	64	127.8	7.892		42	173.68	127.8	7.896					34	175.24	123	7.911
																								35	174.805	123.6	8.125
																								36	174.817	124	8.13
																								37	175.645	125.7	8.375
																								38	175.167	125.7	8.203
																								39	175.187	126	8.245
																								40	175.819	126.5	8.275
																								41	176.124	127.4	8.269
																								42	173.68	127.8	7.896

## Sheet: Assignment - Final
Sequence	Predicted CA	Predicted CB	Predicted CO	Predicted N	Predicted HN	Predicted HA		Peak #	CA(intra)	CA (inter)		CB (intra)	CB(inter)		CO	Notes					highly confident
G	45.295	**.***	173.517	110.01	8.512	3.933		cannot be picked in TROSY													medium confident
H	56.19	30.529	175.378	118.813	8.08	4.667		25	56.1	45.491		41.346	41.35		175.081	process of elimination, has to be this peak since CAi-1 is 45					not very confident
M	55.537	32.516	176.401	122.095	8.447	4.594		missing, no good match
T	62.175	69.857	174.548	116.304	8.229	4.4		5	61.948	55.544			44.666		176.249	peak with the 62/55 pattern for CAi/CAi-1, since it is clustered with the other S/T residues I think it is a T (even though no CB peak is there)
S	58.345	64.022	174.489	118.47	8.401	4.449		missing, no good match
K	56.558	32.996	176.386	123.37	8.415	4.293		31	56.645	58.392		x	x		174.644	This was moved from R20, the CA/CO shifts were very large
H	56.085	30.578	174.876	120.57	8.188	4.607		13	56.116	56.734		30.231	x		176.386
A	52.636	19.163	177.475	125.705	8.319	4.287		38	52.944	56.073		x	x		175.167	only peak at 52, I also turned the contour way up in the HNCB data and could maybe see a CB peak ~20 for 38
H	56.26	30.715	174.782	118.552	8.34	4.616		missing, no good match
D	54.286	41.185	176.161	121.745	8.255	4.636		missing, no good match
V	62.654	32.659	176.241	121.308	8.219	4.112		15	62.623	54.473		32.597	41.272		176.406	This is only place (aside from Proline) where there is 62/54 pattern, 14 fits better
C	58.527	29.557	174.629	122.932	8.491	4.544		28	58.964	62.599		27.865	32.694		176.292
C	58.627	29.478	174.825	122.952	8.632	4.62		missing, no good match
T	62.266	70	174.524	117.43	8.256	4.426		missing, no good match
S	58.439	64.015	174.47	118.515	8.387	4.476		missing, no good match
R	56.168	30.759	176.204	123.415	8.422	4.368		missing, no good match
K	56.669	32.863	176.539	123.162	8.34	4.24		30	57.163	56.408		32.908	30.702		176.512
E	56.809	30.27	176.112	122.694	8.5	4.197		19	56.742	57.022		30.107	33.037		176.638
Y	57.752	38.735	175.484	121.533	8.243	4.606		26	58.536	56.789		38.684	30.172		176.339	no other pair has 38/30 for CB values
R	55.916	30.879	175.903	123.324	8.153	4.292		missing, no good match
E	56.875	30.234	176.576	122.812	8.458	4.216		23	57.077	56.341		29.905	30.966		176.221	23? Could be 19, but 19 CBi-1 value does not make sense here
Q	56.023	29.45	176.12	122.151	8.576	4.412		21	56.466	57.05		29.266	30.033		176.788
T	62.007	69.669	174.644	116.131	8.202	4.264		4	62.512	56.38		69.444	29.114		176.549
K	56.715	33.009	176.281	124.071	8.436	4.25		35	56.629	62.549		32.8	69.589		174.805	visually fits OK with CAi/CAi-1, peak is slightly weird looking. Could be 23 after, but 23 does not have correct CAi-1 value
W	57.254	29.273	176.079	122.147	8.017	4.671		17	57.232	56.89		29.608	32.788		176.395	visually fits OK with CAi/CAi-1, fits great with CB
K	56.41	33.101	175.717	123.387	7.982	4.153		33	56.504	57.244		33.158	29.628		176.268
N	53.482	38.446	175.036	119.025	8.17	4.518		11	53.395	56.47		x	x		176.095	no other peak with 53/56
N	53.885	38.663	175.709	118.833	8.595	4.66		10	53.749	53.333		38.668	x		175.152	only peak that is 53/53, so it has to be this one
G	45.38	**.***	173.494	110.732	8.398	3.981		1	45.635	53.628		x	38.705		175.762
L	55.306	42.264	177.468	121.472	8.041	4.361		18	55.357	45.62		42.498	47.078		174.042
I	60.963	38.364	176.142	122.037	8.223	4.161		32	61.093	55.376		38.295	42.44		177.194
L	54.982	42.417	177.171	127.121	8.307	4.373		41	55.035	61.073		42.482	38.393		176.124	visually matches well with CA and CB
K	56.243	33.024	176.67	123.669	8.433	4.414		29	56.473	54.998		33.033	42.393		177.293	no other match
T	62.17	70.031	174.962	116.222	8.185	4.364		3	61.834	56.529		69.948	33.037		176.761	no other match
G	45.401	**.***	173.478	112.637	8.465	4.01		2	45.31	61.843		x	70.009		175.057
R	56.091	30.852	176.522	121.314	8.239	4.375		16	56.072	45.293		31.041	x		173.901
V	62.542	32.599	175.932	122.057	8.365	4.087		24	62.288	56.1		32.816	30.889		176.295	Could be 23, 24, 30, or 36 from HNCB and HNCOCACB. Only 24 fits with HNCA and HNCOCA data. No other pair of 62-56 matches CB data
N	53.285	38.704	174.952	122.614	8.614	4.636		27	52.959	62.331		38.918	32.85		175.695	Visually matches well for CA and OK for CB data. No other predicted 53-62 pair in sequence
H	56.436	30.378	175.209	120.356	8.472	4.636		8	56.205	52.967		43.323	x		174.747	Cb is way off, but the pattern fits for CA and the CO fits the preceding residue
Q	56.049	29.299	175.992	121.518	8.297	4.367		missing, no good match
S	58.628	63.791	174.477	117.165	8.479	4.384		7	58.653	56.085		66.907	x		175.962	Only S/T residue left that isn't paired, 58/56 pattern
H	55.977	30.635	174.879	121.254	8.383	4.704		missing, no good match
R	54.192	30.11	174.015	124.095	8.239	4.561		36	53.804	56.221		30.262	30.422		174.817	Only spot left with 53/56 and 30/30 pattern
P	63.168	32.051	176.36	***.***	*.***	4.373		cannot be picked in TROSY
F	57.398	39.678	175.393	120.919	8.357	4.66		12	57.649	63.253		39.431	32.04		176.271
V	61.889	33.099	175.285	123.021	7.971	4.101		34	61.984	57.653		33.345	39.497		175.24
V	62.136	32.735	175.986	125.698	8.22	4.096		39	62.249	61.996		32.691	33.426		175.187
I	61.063	38.78	175.949	126.79	8.398	4.168		40	60.738	62.311		38.856	32.834		175.819
D	54.439	41.081	176.03	125.527	8.537	4.612		37	54.309	60.754		41.346	38.921		175.645
D	54.771	40.766	176.344	120.937	8.353	4.572		22	54.231	54.34		41.424	41.303		175.772	Has to be 22
D	54.826	40.543	176.957	119.485	8.185	4.625		20	54.473	54.38		40.739	41.381		176.16	Could be 20 or 22, 22 fits better visually for CA and CB
S	58.776	63.55	175.058	115.389	8.164	4.463		6	59.051	54.578		63.747	41.023		176.721
S	58.639	63.48	174.908	116.737	8.188	4.467		9	58.573	59.046		64.308	63.829		174.758	Only peak that could be SS
M	55.724	32.796	176.307	121.927	8.369	4.507		42	57.276	58.633		33.718	64		173.68	could be 42

## Sheet: Chemical Shift
Sequence	Predicted CA	Predicted CB	Predicted CO		Peak #	CA(intra)	CA (inter)	CB (intra)	CO		Chemical Shift (CA and CB)	CA		CO (shifted)	CO	Sequence
G	45.295	**.***	173.517			45.491				1	0	0.196		175.081	1.564	G
H	56.19	30.529	175.378		25	56.1	45.491	41.253	175.081	2	-10.814	-0.09				H
M	55.537	32.516	176.401			55.444				3	0	-0.093		176.249	-0.152	M
T	62.175	69.857	174.548		5	61.948	55.544		176.249	4	0	-0.227				T
S	58.345	64.022	174.489							5	0			174.644	0.155	S
K	56.558	32.996	176.386		31	56.645			174.644	6	0	0.087		176.386	0	K
H	56.085	30.578	174.876		13	56.116	56.734	30.293	176.386	7	0.316	0.031		175.167	0.291	H
A	52.636	19.163	177.475		38	52.944	56.073	x	175.167	8	0	0.308				A
H	56.26	30.715	174.782							9						H
D	54.286	41.185	176.161			54.473				10	0	0.187		176.406	0.245	D
V	62.654	32.659	176.241		15	62.623	54.473	32.66	176.406	11	-0.032	-0.031		176.292	0.051	V
C	58.527	29.557	174.629		28	58.964	62.599	27.865	176.292	12	2.129	0.437				C
C	58.627	29.478	174.825							13	0					C
T	62.266	70	174.524							14	0					T
S	58.439	64.015	174.47							15	0					S
R	56.168	30.759	176.204			56.408				16	0	0.24		176.512	0.308	R
K	56.669	32.863	176.539		30	57.163	56.408	33.033	176.512	17	0.324	0.494		176.638	0.099	K
E	56.809	30.27	176.112		19	56.742	57.022	30.107	176.638	18	0.096	-0.067		176.339	0.227	E
Y	57.752	38.735	175.484		26	58.536	56.789	38.762	176.339	19	0.757	0.784				Y
R	55.916	30.879	175.903			56.341				20	0	0.425		176.221	0.318	R
E	56.875	30.234	176.576		23	57.077	56.341	30.107	176.221	21	0.329	0.202		176.788	0.212	E
Q	56.023	29.45	176.12		21	56.466	57.05	29.359	176.788	22	0.534	0.443		176.549	0.429	Q
T	62.007	69.669	174.644		4	62.512	56.38	69.46	176.549	23	0.714	0.505		174.805	0.161	T
K	56.715	33.009	176.281		35	56.629	62.549	32.909	174.805	24	0.014	-0.086		176.395	0.114	K
W	57.254	29.273	176.079		17	57.232	56.89	29.608	176.395	25	-0.357	-0.022		176.268	0.189	W
K	56.41	33.101	175.717		33	56.504	57.244	33.158	176.268	26	0.037	0.094		176.095	0.378	K
N	53.482	38.446	175.036		11	53.395	56.47	x	176.095	27	0	-0.087		175.152	0.116	N
N	53.885	38.663	175.709		10	53.749	53.333	38.637	175.152	28	-0.11	-0.136		175.762	0.053	N
G	45.38	**.***	173.494		1	45.635	53.628	x	175.762	29	0	0.255		174.042	0.548	G
L	55.306	42.264	177.468		18	55.357	45.62	42.498	174.042	30	-0.183	0.051		177.194	-0.274	L
I	60.963	38.364	176.142		32	61.093	55.376	38.388	177.194	31	0.106	0.13		176.124	-0.018	I
L	54.982	42.417	177.171		41	55.035	61.073	42.498	176.124	32	-0.028	0.053		177.293	0.122	L
K	56.243	33.024	176.67		29	56.473	54.998	33.033	177.293	33	0.221	0.23		176.761	0.091	K
T	62.17	70.031	174.962		3	61.834	56.529	69.948	176.761	34	-0.253	-0.336		175.057	0.095	T
G	45.401	**.***	173.478		2	45.31	61.843	x	175.057	35	0	-0.091		173.901	0.423	G
R	56.091	30.852	176.522		16	56.072	45.293	31.103	173.901	36	-0.27	-0.019		176.295	-0.227	R
V	62.542	32.599	175.932		24	62.288	56.1	33.158	176.295	37	-0.813	-0.254		175.695	-0.237	V
N	53.285	38.704	174.952		27	52.959	62.331	38.762	175.695	38	-0.384	-0.326		174.747	-0.205	N
H	56.436	30.378	175.209		8	56.205	52.967	43.432	174.747	39	-13.285	-0.231				H
Q	56.049	29.299	175.992			56.085				40	0	0.036		175.962	-0.03	Q
S	58.628	63.791	174.477		7	58.653	56.085	66.907	175.962	41	-3.091	0.025				S
H	55.977	30.635	174.879			56.221				42	0	0.244		174.817	-0.062	H
R	54.192	30.11	174.015		36	53.804	56.221	30.044	174.817	43	-0.322	-0.388				R
P	63.168	32.051	176.36			63.253				44	0	0.085		176.271	-0.089	P
F	57.398	39.678	175.393		12	57.649	63.253	39.447	176.271	45	0.482	0.251		175.24	-0.153	F
V	61.889	33.099	175.285		34	61.984	57.653	33.345	175.24	46	-0.151	0.095		175.187	-0.098	V
V	62.136	32.735	175.986		39	62.249	61.996	32.784	175.187	47	0.064	0.113		175.819	-0.167	V
I	61.063	38.78	175.949		40	60.738	62.311	38.949	175.819	48	-0.494	-0.325		175.645	-0.304	I
D	54.439	41.081	176.03		37	54.309	60.754	41.439	175.645	49	-0.488	-0.13		175.772	-0.258	D
D	54.771	40.766	176.344		22	54.231	54.34	41.564	175.772	50	-1.338	-0.54		176.16	-0.184	D
D	54.826	40.543	176.957		20	54.473	54.38	40.879	176.16	51	-0.689	-0.353		176.721	-0.236	D
S	58.776	63.55	175.058		6	59.051	54.578	63.856	176.721	52	-0.031	0.275		174.758	-0.3	S
S	58.639	63.48	174.908		9	58.573	59.046	64.043	174.758	53	-0.629	-0.066		173.68	-1.228	S
M	55.724	32.796	176.307		42	57.276	58.633	33.718	173.68	54	0.63	1.552				M
