# Supplementary material for: The intrinsically disordered cytoplasmic tail of a dendrite branching receptor uses two distinct mechanisms to regulate the actin cytoskeleton
Source: eLife journal article supplement (doi:10.7554/elife.88492), 2023-07-17
Supplement: fig2-figsupp1-data1 [file Figure 2 — figure supplement 1A Source Data.xlsx]

## Sheet: Corrected Data
		HPO30 degrees	molar ellipticity				millidegrees	molar ellipticity
	190	-0.00893068	-692.408			190	0.00450604	2620.26
	191	-0.0160093	-1241.22			191	-0.00311856	-1813.45
	192	-0.0214287	-1661.4			192	-0.00989583	-5754.42
	193	-0.0251891	-1952.95			193	-0.0158257	-9202.65
	194	-0.0248453	-1926.29			194	-0.0200622	-11666.2
	195	-0.0258673	-2005.53			195	-0.026029	-15135.9
	196	-0.0272574	-2113.3			196	-0.0274779	-15978.4
	197	-0.0276263	-2141.9			197	-0.0280819	-16329.6
	198	-0.0272967	-2116.35			198	-0.0277956	-16163.2
	199	-0.0262059	-2031.78			199	-0.0274482	-15961.1
	200	-0.0260407	-2018.97			200	-0.0269883	-15693.7
	201	-0.0250226	-1940.04			201	-0.0254399	-14793.3
	202	-0.0237767	-1843.44			202	-0.0243609	-14165.9
	203	-0.0223663	-1734.09			203	-0.0231294	-13449.7
	204	-0.0206055	-1597.57			204	-0.0216211	-12572.7
	205	-0.0188794	-1463.74			205	-0.0201671	-11727.2
	206	-0.0172567	-1337.93			206	-0.0186373	-10837.6
	207	-0.0156659	-1214.6			207	-0.0170257	-9900.46
	208	-0.0141793	-1099.34			208	-0.0155791	-9059.27
	209	-0.0126776	-982.914			209	-0.0143337	-8335.06
	210	-0.0113058	-876.553			210	-0.0131009	-7618.17
	211	-0.0103072	-799.134			211	-0.012142	-7060.56
	212	-0.00942114	-730.434			212	-0.0112006	-6513.17
	213	-0.00869027	-673.768			213	-0.0105297	-6123.03
	214	-0.00817932	-634.154			214	-0.0100107	-5821.22
	215	-0.00771503	-598.157			215	-0.0095114	-5530.88
	216	-0.00739636	-573.45			216	-0.00920543	-5352.96
	217	-0.00709371	-549.985			217	-0.00895177	-5205.45
	218	-0.00686789	-532.477			218	-0.00867595	-5045.06
	219	-0.0066237	-513.544			219	-0.00844411	-4910.25
	220	-0.00650716	-504.509			220	-0.00826524	-4806.24
	221	-0.00637521	-494.279			221	-0.00802438	-4666.18
	222	-0.0062066	-481.206			222	-0.0078187	-4546.57
	223	-0.0058682	-454.97			223	-0.00747172	-4344.81
	224	-0.00567274	-439.815			224	-0.00718154	-4176.07
	225	-0.00540636	-419.162			225	-0.00690989	-4018.1
	226	-0.00522724	-405.275			226	-0.00669055	-3890.55
	227	-0.00502396	-389.514			227	-0.00643231	-3740.39
	228	-0.00473821	-367.36			228	-0.00610367	-3549.29
	229	-0.00441913	-342.621			229	-0.00572575	-3329.53
	230	-0.00414469	-321.343			230	-0.00540265	-3141.64
	231	-0.00380236	-294.802			231	-0.005091	-2960.42
	232	-0.00353799	-274.305			232	-0.00479701	-2789.46
	233	-0.00329458	-255.433			233	-0.00448087	-2605.63
	234	-0.00303049	-234.958			234	-0.00416355	-2421.1
	235	-0.00276312	-214.228			235	-0.00390241	-2269.25
	236	-0.00248288	-192.501			236	-0.00365935	-2127.91
	237	-0.00220329	-170.824			237	-0.00340646	-1980.86
	238	-0.00191106	-148.167			238	-0.00313578	-1823.46
	239	-0.00163291	-126.602			239	-0.00283852	-1650.6
	240	-0.00141869	-109.993			240	-0.00257204	-1495.64
	241	-0.00127198	-98.6185			241	-0.00239945	-1395.28
	242	-0.00116618	-90.4156			242	-0.00222518	-1293.94
	243	-0.00111192	-86.2088			243	-0.00211096	-1227.53
	244	-0.000953986	-73.9638			244	-0.00196604	-1143.25
	245	-0.000820875	-63.6435			245	-0.00187934	-1092.84
	246	-0.000728309	-56.4668			246	-0.00177163	-1030.2
	247	-0.000688633	-53.3907			247	-0.0017627	-1025.01
	248	-0.000668667	-51.8426			248	-0.00172833	-1005.02
	249	-0.000664191	-51.4956			249	-0.00168853	-981.88
	250	-0.000569751	-44.1735			250	-0.00159221	-925.87
	251	-0.000472918	-36.666			251	-0.00149402	-868.77
	252	-0.000402905	-31.2378			252	-0.00139654	-812.089
	253	-0.000378247	-29.326			253	-0.00137966	-802.271
	254	-0.000388276	-30.1036			254	-0.00137524	-799.704
	255	-0.000409124	-31.7199			255	-0.00138615	-806.045
	256	-0.000391238	-30.3332			256	-0.00137505	-799.594
	257	-0.00040783	-31.6196			257	-0.00133096	-773.951
	258	-0.000401359	-31.1179			258	-0.00131084	-762.251
	259	-0.000393279	-30.4914			259	-0.00129919	-755.481
	260	-0.000383593	-29.7405			260	-0.00129603	-753.641

## Sheet: Data Correction
Buffer	millidegrees	degrees		HPO30	uncorrected	corrected	degrees		Buffer + 1M TMAO	uncorrected	corrected		HPO30 + 0.1M TMAO	uncorrected	corrected	millidegrees
190	-2.54122	-0.00254122		190	-11.4719	-8.93068	-0.00893068		190	-12.7894	-10.2482		190	0.940006	4.50604	0.00450604
191	-1.47383	-0.00147383		191	-17.4831	-16.0093	-0.0160093		191	-7.89878	-6.42495		191	-5.23489	-3.11856	-0.00311856
192	-0.754355	-0.000754355		192	-22.1831	-21.4287	-0.0214287		192	-4.16555	-3.41119		192	-10.9913	-9.89583	-0.00989583
193	-0.382793	-0.000382793		193	-25.5719	-25.1891	-0.0251891		193	-1.58973	-1.20694		193	-16.3292	-15.8257	-0.0158257
194	-0.531673	-0.000531673		194	-25.377	-24.8453	-0.0248453		194	-1.30226	-0.770587		194	-20.6709	-20.0622	-0.0200622
195	-0.933393	-0.000933393		195	-26.8007	-25.8673	-0.0258673		195	-2.29254	-1.35915		195	-27.0983	-26.029	-0.026029
196	-1.02698	-0.00102698		196	-28.2844	-27.2574	-0.0272574		196	1.16429	2.19127		196	-28.2858	-27.4779	-0.0274779
197	-1.10542	-0.00110542		197	-28.7317	-27.6263	-0.0276263		197	0.757413	1.86283		197	-29.001	-28.0819	-0.0280819
198	-1.08883	-0.00108883		198	-28.3855	-27.2967	-0.0272967		198	0.817675	1.90651		198	-28.6938	-27.7956	-0.0277956
199	-0.946087	-0.000946087		199	-27.152	-26.2059	-0.0262059		199	1.05786	2.00395		199	-28.1939	-27.4482	-0.0274482
200	-0.90096	-0.00090096		200	-26.9417	-26.0407	-0.0260407		200	0.170095	1.07105		200	-27.7822	-26.9883	-0.0269883
201	-0.925576	-0.000925576		201	-25.9482	-25.0226	-0.0250226		201	-1.52946	-0.603884		201	-26.4259	-25.4399	-0.0254399
202	-1.01082	-0.00101082		202	-24.7875	-23.7767	-0.0237767		202	-1.66014	-0.64932		202	-25.4367	-24.3609	-0.0243609
203	-1.00902	-0.00100902		203	-23.3753	-22.3663	-0.0223663		203	-0.967248	0.041772		203	-24.1342	-23.1294	-0.0231294
204	-1.11402	-0.00111402		204	-21.7195	-20.6055	-0.0206055		204	-0.852393	0.261627		204	-22.709	-21.6211	-0.0216211
205	-1.03915	-0.00103915		205	-19.9185	-18.8794	-0.0188794		205	-0.796529	0.242621		205	-21.182	-20.1671	-0.0201671
206	-0.999246	-0.000999246		206	-18.2559	-17.2567	-0.0172567		206	-1.15951	-0.160264		206	-19.6526	-18.6373	-0.0186373
207	-0.975801	-0.000975801		207	-16.6417	-15.6659	-0.0156659		207	-1.26646	-0.290659		207	-18.0306	-17.0257	-0.0170257
208	-0.964681	-0.000964681		208	-15.144	-14.1793	-0.0141793		208	-1.26742	-0.302739		208	-16.5741	-15.5791	-0.0155791
209	-1.02467	-0.00102467		209	-13.7023	-12.6776	-0.0126776		209	-1.2477	-0.22303		209	-15.3807	-14.3337	-0.0143337
210	-1.10081	-0.00110081		210	-12.4066	-11.3058	-0.0113058		210	-1.41074	-0.30993		210	-14.2327	-13.1009	-0.0131009
211	-1.12106	-0.00112106		211	-11.4283	-10.3072	-0.0103072		211	-1.33974	-0.21868		211	-13.2849	-12.142	-0.012142
212	-1.13196	-0.00113196		212	-10.5531	-9.42114	-0.00942114		212	-1.35995	-0.22799		212	-12.3554	-11.2006	-0.0112006
213	-1.08785	-0.00108785		213	-9.77812	-8.69027	-0.00869027		213	-1.34421	-0.25636		213	-11.6432	-10.5297	-0.0105297
214	-1.02188	-0.00102188		214	-9.2012	-8.17932	-0.00817932		214	-1.30514	-0.28326		214	-11.0609	-10.0107	-0.0100107
215	-1.04385	-0.00104385		215	-8.75888	-7.71503	-0.00771503		215	-1.2994	-0.25555		215	-10.5808	-9.5114	-0.0095114
216	-1.00203	-0.00100203		216	-8.39839	-7.39636	-0.00739636		216	-1.29446	-0.29243		216	-10.2367	-9.20543	-0.00920543
217	-0.998112	-0.000998112		217	-8.09182	-7.09371	-0.00709371		217	-1.21064	-0.212528		217	-9.97113	-8.95177	-0.00895177
218	-0.962591	-0.000962591		218	-7.83048	-6.86789	-0.00686789		218	-1.2288	-0.266209		218	-9.66516	-8.67595	-0.00867595
219	-0.926672	-0.000926672		219	-7.55037	-6.6237	-0.0066237		219	-1.26148	-0.334808		219	-9.40426	-8.44411	-0.00844411
220	-0.854562	-0.000854562		220	-7.36172	-6.50716	-0.00650716		220	-1.22861	-0.374048		220	-9.15721	-8.26524	-0.00826524
221	-0.817078	-0.000817078		221	-7.19229	-6.37521	-0.00637521		221	-1.18807	-0.370992		221	-8.87856	-8.02438	-0.00802438
222	-0.790635	-0.000790635		222	-6.99723	-6.2066	-0.0062066		222	-1.14808	-0.357445		222	-8.64508	-7.8187	-0.0078187
223	-0.809667	-0.000809667		223	-6.67787	-5.8682	-0.0058682		223	-1.04095	-0.231283		223	-8.30452	-7.47172	-0.00747172
224	-0.763639	-0.000763639		224	-6.43638	-5.67274	-0.00567274		224	-1.04671	-0.283071		224	-7.97349	-7.18154	-0.00718154
225	-0.748245	-0.000748245		225	-6.1546	-5.40636	-0.00540636		225	-1.02393	-0.275685		225	-7.6857	-6.90989	-0.00690989
226	-0.658759	-0.000658759		226	-5.886	-5.22724	-0.00522724		226	-0.984385	-0.325626		226	-7.38187	-6.69055	-0.00669055
227	-0.611465	-0.000611465		227	-5.63542	-5.02395	-0.00502396		227	-0.927327	-0.315862		227	-7.07536	-6.43231	-0.00643231
228	-0.595229	-0.000595229		228	-5.33344	-4.73821	-0.00473821		228	-0.9165	-0.321271		228	-6.73103	-6.10367	-0.00610367
229	-0.602718	-0.000602718		229	-5.02185	-4.41913	-0.00441913		229	-0.866197	-0.263479		229	-6.35482	-5.72575	-0.00572575
230	-0.590909	-0.000590909		230	-4.7356	-4.14469	-0.00414469		230	-0.877055	-0.286146		230	-6.02217	-5.40265	-0.00540265
231	-0.592492	-0.000592492		231	-4.39485	-3.80236	-0.00380236		231	-0.871881	-0.279389		231	-5.71143	-5.091	-0.005091
232	-0.575505	-0.000575505		232	-4.1135	-3.538	-0.00353799		232	-0.852936	-0.277431		232	-5.40026	-4.79701	-0.00479701
233	-0.544876	-0.000544876		233	-3.83946	-3.29458	-0.00329458		233	-0.815074	-0.270198		233	-5.05277	-4.48087	-0.00448087
234	-0.496877	-0.000496877		234	-3.52737	-3.03049	-0.00303049		234	-0.757627	-0.26075		234	-4.6865	-4.16355	-0.00416355
235	-0.43943	-0.00043943		235	-3.20255	-2.76312	-0.00276312		235	-0.716529	-0.277099		235	-4.36955	-3.90241	-0.00390241
236	-0.386166	-0.000386166		236	-2.86905	-2.48288	-0.00248288		236	-0.672952	-0.286786		236	-4.07419	-3.65935	-0.00365935
237	-0.349487	-0.000349487		237	-2.55278	-2.20329	-0.00220329		237	-0.682868	-0.333381		237	-3.78929	-3.40646	-0.00340646
238	-0.362043	-0.000362043		238	-2.2731	-1.91106	-0.00191106		238	-0.68683	-0.324787		238	-3.5303	-3.13578	-0.00313578
239	-0.392128	-0.000392128		239	-2.02504	-1.63291	-0.00163291		239	-0.654147	-0.262019		239	-3.25685	-2.83852	-0.00283852
240	-0.394007	-0.000394007		240	-1.8127	-1.41869	-0.00141869		240	-0.608467	-0.21446		240	-2.98749	-2.57204	-0.00257204
241	-0.351637	-0.000351637		241	-1.62362	-1.27198	-0.00127198		241	-0.57886	-0.227223		241	-2.77381	-2.39945	-0.00239945
242	-0.280979	-0.000280979		242	-1.44716	-1.16618	-0.00116618		242	-0.53903	-0.258051		242	-2.53196	-2.22518	-0.00222518
243	-0.208008	-0.000208008		243	-1.31993	-1.11192	-0.00111192		243	-0.504384	-0.296376		243	-2.34861	-2.11096	-0.00211096
244	-0.193054	-0.000193054		244	-1.14704	-0.953986	-0.000953986		244	-0.470549	-0.277495		244	-2.18684	-1.96604	-0.00196604
245	-0.173198	-0.000173198		245	-0.994073	-0.820875	-0.000820875		245	-0.438613	-0.265415		245	-2.07908	-1.87934	-0.00187934
246	-0.150003	-0.000150003		246	-0.878312	-0.728309	-0.000728309		246	-0.392554	-0.242551		246	-1.94589	-1.77163	-0.00177163
247	-0.0818098	-8.18098e-05		247	-0.770443	-0.688633	-0.000688633		247	-0.379054	-0.297244		247	-1.87423	-1.7627	-0.0017627
248	-0.0093412	-9.3412e-06		248	-0.678008	-0.668667	-0.000668667		248	-0.343738	-0.334397		248	-1.77111	-1.72833	-0.00172833
249	0.0341752	3.41752e-05		249	-0.630016	-0.664191	-0.000664191		249	-0.267776	-0.301951		249	-1.68455	-1.68853	-0.00168853
250	0.0349719	3.49719e-05		250	-0.534779	-0.569751	-0.000569751		250	-0.245941	-0.280913		250	-1.58533	-1.59221	-0.00159221
251	0.0336399	3.36399e-05		251	-0.439278	-0.472918	-0.000472918		251	-0.214306	-0.247946		251	-1.48517	-1.49402	-0.00149402
252	0.0180394	1.80394e-05		252	-0.384866	-0.402905	-0.000402905		252	-0.179031	-0.19707		252	-1.39821	-1.39654	-0.00139654
253	0.0275414	2.75414e-05		253	-0.350706	-0.378247	-0.000378247		253	-0.200898	-0.228439		253	-1.37496	-1.37966	-0.00137966
254	0.0503742	5.03742e-05		254	-0.337902	-0.388276	-0.000388276		254	-0.177332	-0.227706		254	-1.34764	-1.37524	-0.00137524
255	0.077719	7.7719e-05		255	-0.331405	-0.409124	-0.000409124		255	-0.175284	-0.253003		255	-1.33373	-1.38615	-0.00138615
256	0.0970415	9.70415e-05		256	-0.294196	-0.391238	-0.000391238		256	-0.190338	-0.28738		256	-1.30675	-1.37505	-0.00137505
257	0.107924	0.000107924		257	-0.299906	-0.40783	-0.00040783		257	-0.15666	-0.264584		257	-1.24949	-1.33096	-0.00133096
258	0.116987	0.000116987		258	-0.284372	-0.401359	-0.000401359		258	-0.110428	-0.227415		258	-1.21659	-1.31084	-0.00131084
259	0.123335	0.000123335		259	-0.269944	-0.393279	-0.000393279		259	-0.0450844	-0.168419		259	-1.1927	-1.29919	-0.00129919
260	0.126969	0.000126969		260	-0.256624	-0.383593	-0.000383593		260	0.0393701	-0.0875989		260	-1.17782	-1.29603	-0.00129603
