# Supplementary material for: The intrinsically disordered cytoplasmic tail of a dendrite branching receptor uses two distinct mechanisms to regulate the actin cytoskeleton
Source: eLife journal article supplement (doi:10.7554/elife.88492), 2023-07-17
Supplement: fig3-figsupp1-data2 [file Figure 3 - figure supplement 1C MW Determination.xlsx]

## Sheet: Stnadard Curve Proteins
mL	mAU
-0.00577	0.38594
0.006727	0.027285
0.019224	0.008136
0.031722	0.007092
0.044219	-0.657794
0.056717	-1.05052
0.069214	-1.14609
0.081712	-1.18005
0.094209	-0.265343
0.106706	0.733049
0.119204	1.59686
0.131701	2.13821
0.144199	2.26954
0.156696	2.17209
0.169194	1.9724
0.181691	1.77874
0.194188	1.66468
0.206686	1.55375
0.219183	1.47131
0.231681	1.39005
0.244178	1.28555
0.256675	1.22382
0.269173	1.1379
0.28167	1.06703
0.294168	0.987749
0.306665	0.933587
0.319163	0.875662
0.33166	0.787666
0.344157	0.775545
0.356655	0.69801
0.369152	0.676783
0.38165	0.606617
0.394147	0.60783
0.406645	0.590829
0.419142	0.540839
0.431639	0.531054
0.444137	0.508725
0.456634	0.453621
0.469132	0.443828
0.481629	0.410005
0.494126	0.407587
0.506624	0.363443
0.519121	0.347489
0.531619	0.321579
0.544116	0.261918
0.556614	0.250067
0.569111	0.218915
0.581608	0.157758
0.594106	0.170358
0.606603	0.125859
0.619101	0.110619
0.631598	0.08444
0.644095	0.055622
0.656593	0.05795
0.66909	0.045093
0.681588	-0.002207
0.694085	-0.004633
0.706583	-0.019566
0.71908	-0.062407
0.731577	-0.076979
0.744075	-0.060241
0.756572	-0.102939
0.76907	-0.111161
0.781567	-0.102389
0.794065	-0.128843
0.806562	-0.126527
0.819059	-0.159196
0.831557	-0.152483
0.844054	-0.156867
0.856552	-0.173897
0.869049	-0.168075
0.881546	-0.196338
0.894044	-0.19989
0.906541	-0.195304
0.919039	-0.209937
0.931536	-0.219046
0.944034	-0.225735
0.956531	-0.208853
0.969028	-0.223676
0.981526	-0.241363
0.994023	-0.234968
1.00652	-0.248703
1.01902	-0.246952
1.03152	-0.26377
1.04401	-0.276178
1.05651	-0.272126
1.06901	-0.268519
1.0815	-0.266803
1.094	-0.271306
1.1065	-0.284941
1.119	-0.283955
1.13149	-0.296376
1.14399	-0.2982
1.15649	-0.306144
1.16899	-0.288207
1.18148	-0.324152
1.19398	-0.286081
1.20648	-0.304195
1.21898	-0.310428
1.23147	-0.303111
1.24397	-0.30971
1.25647	-0.313619
1.26897	-0.329032
1.28146	-0.339242
1.29396	-0.322261
1.30646	-0.328426
1.31896	-0.316706
1.33145	-0.316872
1.34395	-0.3228
1.35645	-0.335381
1.36895	-0.326244
1.38144	-0.333409
1.39394	-0.331473
1.40644	-0.315164
1.41894	-0.348852
1.43143	-0.338538
1.44393	-0.328208
1.45643	-0.353466
1.46893	-0.345504
1.48142	-0.354981
1.49392	-0.345783
1.50642	-0.34465
1.51892	-0.346939
1.53141	-0.356098
1.54391	-0.34962
1.55641	-0.354507
1.5689	-0.351172
1.5814	-0.340523
1.5939	-0.317589
1.6064	-0.317026
1.61889	-0.297543
1.63139	-0.294159
1.64389	-0.297039
1.65639	-0.292233
1.66888	-0.309558
1.68138	-0.313368
1.69388	-0.303014
1.70638	-0.288284
1.71887	-0.29582
1.73137	-0.316191
1.74387	-0.315212
1.75637	-0.300931
1.76886	-0.321489
1.78136	-0.308898
1.79386	-0.323408
1.80636	-0.329134
1.81885	-0.331323
1.83135	-0.331407
1.84385	-0.319911
1.85634	-0.332738
1.86884	-0.323407
1.88134	-0.327499
1.89384	-0.335486
1.90633	-0.341082
1.91883	-0.352913
1.93133	-0.340021
1.94383	-0.338325
1.95633	-0.36095
1.96882	-0.351796
1.98132	-0.334563
1.99382	-0.363345
2.00631	-0.373651
2.01881	-0.364601
2.03131	-0.369482
2.04381	-0.3541
2.0563	-0.361492
2.0688	-0.3294
2.0813	-0.369998
2.0938	-0.380902
2.10629	-0.374964
2.11879	-0.38821
2.13129	-0.383159
2.14379	-0.389815
2.15628	-0.402264
2.16878	-0.392301
2.18128	-0.387509
2.19378	-0.420849
2.20627	-0.399081
2.21877	-0.38708
2.23127	-0.402706
2.24376	-0.415347
2.25626	-0.414034
2.26876	-0.399466
2.28126	-0.407201
2.29375	-0.422079
2.30625	-0.442306
2.31875	-0.440088
2.33125	-0.441757
2.34375	-0.441913
2.35624	-0.443546
2.36874	-0.441858
2.38124	-0.451157
2.39373	-0.440682
2.40623	-0.455182
2.41873	-0.43658
2.43123	-0.454416
2.44372	-0.439949
2.45622	-0.45494
2.46872	-0.452216
2.48122	-0.462664
2.49371	-0.453072
2.50621	-0.470139
2.51871	-0.450073
2.53121	-0.451827
2.5437	-0.453874
2.5562	-0.469139
2.5687	-0.47874
2.5812	-0.476819
2.59369	-0.470138
2.60619	-0.483583
2.61869	-0.488043
2.63118	-0.486382
2.64368	-0.501227
2.65618	-0.491241
2.66868	-0.513743
2.68118	-0.499988
2.69367	-0.5058
2.70617	-0.502638
2.71867	-0.498808
2.73116	-0.500344
2.74366	-0.516936
2.75616	-0.518392
2.76866	-0.512466
2.78115	-0.521116
2.79365	-0.504811
2.80615	-0.510054
2.81865	-0.528684
2.83114	-0.516713
2.84364	-0.510015
2.85614	-0.513487
2.86864	-0.516874
2.88113	-0.5231
2.89363	-0.514198
2.90613	-0.534652
2.91863	-0.504375
2.93112	-0.518679
2.94362	-0.532442
2.95612	-0.5137
2.96862	-0.534772
2.98111	-0.54234
2.99361	-0.524204
3.00611	-0.542334
3.0186	-0.532336
3.0311	-0.543374
3.0436	-0.523552
3.0561	-0.543347
3.0686	-0.551449
3.08109	-0.553525
3.09359	-0.565993
3.10609	-0.558489
3.11858	-0.556563
3.13108	-0.547726
3.14358	-0.544109
3.15608	-0.558383
3.16857	-0.538946
3.18107	-0.564958
3.19357	-0.55294
3.20607	-0.550803
3.21856	-0.553749
3.23106	-0.559234
3.24356	-0.574919
3.25606	-0.566244
3.26855	-0.552368
3.28105	-0.575561
3.29355	-0.562246
3.30605	-0.581747
3.31854	-0.565172
3.33104	-0.581219
3.34354	-0.590923
3.35604	-0.578214
3.36853	-0.582769
3.38103	-0.573884
3.39353	-0.573388
3.40603	-0.587886
3.41852	-0.598271
3.43102	-0.586827
3.44352	-0.593055
3.45601	-0.576881
3.46851	-0.573238
3.48101	-0.568761
3.49351	-0.591664
3.50601	-0.578025
3.5185	-0.595514
3.531	-0.596742
3.5435	-0.597489
3.55599	-0.599729
3.56849	-0.589002
3.58099	-0.591034
3.59349	-0.600081
3.60598	-0.593772
3.61848	-0.593612
3.63098	-0.59724
3.64348	-0.618973
3.65597	-0.599375
3.66847	-0.605357
3.68097	-0.595939
3.69347	-0.593566
3.70596	-0.614979
3.71846	-0.599864
3.73096	-0.615413
3.74346	-0.604245
3.75595	-0.644041
3.76845	-0.609245
3.78095	-0.621155
3.79345	-0.620748
3.80594	-0.635339
3.81844	-0.615803
3.83094	-0.624298
3.84343	-0.62051
3.85593	-0.629186
3.86843	-0.639334
3.88093	-0.626683
3.89343	-0.630623
3.90592	-0.638494
3.91842	-0.647254
3.93092	-0.644263
3.94341	-0.638033
3.95591	-0.66024
3.96841	-0.631135
3.98091	-0.636593
3.9934	-0.635571
4.0059	-0.629716
4.0184	-0.633336
4.0309	-0.631357
4.04339	-0.641079
4.05589	-0.649944
4.06839	-0.657619
4.08089	-0.646704
4.09338	-0.641673
4.10588	-0.645883
4.11838	-0.641549
4.13088	-0.62905
4.14337	-0.627915
4.15587	-0.644944
4.16837	-0.64816
4.18087	-0.656865
4.19336	-0.646954
4.20586	-0.634703
4.21836	-0.637965
4.23086	-0.652145
4.24335	-0.658533
4.25585	-0.6517
4.26835	-0.661377
4.28085	-0.656994
4.29334	-0.66116
4.30584	-0.661645
4.31834	-0.67197
4.33084	-0.64761
4.34333	-0.664953
4.35583	-0.653533
4.36833	-0.655625
4.38082	-0.654892
4.39332	-0.66296
4.40582	-0.643231
4.41832	-0.683075
4.43081	-0.649982
4.44331	-0.663278
4.45581	-0.662988
4.46831	-0.671801
4.4808	-0.67656
4.4933	-0.685198
4.5058	-0.671225
4.5183	-0.660796
4.53079	-0.665956
4.54329	-0.651942
4.55579	-0.669108
4.56829	-0.672662
4.58078	-0.677543
4.59328	-0.662933
4.60578	-0.673727
4.61827	-0.650008
4.63077	-0.67678
4.64327	-0.663394
4.65577	-0.652941
4.66826	-0.658244
4.68076	-0.674317
4.69326	-0.679154
4.70576	-0.670334
4.71826	-0.657036
4.73075	-0.687682
4.74325	-0.672892
4.75575	-0.684391
4.76824	-0.656689
4.78074	-0.663938
4.79324	-0.681812
4.80574	-0.675624
4.81823	-0.682371
4.83073	-0.688326
4.84323	-0.669664
4.85573	-0.658702
4.86822	-0.668588
4.88072	-0.677928
4.89322	-0.672601
4.90572	-0.668355
4.91821	-0.652981
4.93071	-0.639265
4.94321	-0.646982
4.95571	-0.675552
4.9682	-0.655461
4.9807	-0.650297
4.9932	-0.657713
5.0057	-0.629137
5.01819	-0.653656
5.03069	-0.63818
5.04319	-0.636393
5.05569	-0.652304
5.06818	-0.647331
5.08068	-0.649857
5.09318	-0.649029
5.10567	-0.643779
5.11817	-0.659154
5.13067	-0.66486
5.14317	-0.658822
5.15566	-0.653437
5.16816	-0.652354
5.18066	-0.656508
5.19316	-0.667337
5.20565	-0.649571
5.21815	-0.666727
5.23065	-0.655534
5.24315	-0.63432
5.25564	-0.669225
5.26814	-0.654792
5.28064	-0.65692
5.29314	-0.65269
5.30563	-0.648348
5.31813	-0.635676
5.33063	-0.657848
5.34313	-0.651337
5.35562	-0.648949
5.36812	-0.652338
5.38062	-0.644636
5.39312	-0.654563
5.40561	-0.647025
5.41811	-0.650349
5.43061	-0.650675
5.44311	-0.643293
5.4556	-0.649515
5.4681	-0.638502
5.4806	-0.655512
5.4931	-0.633996
5.50559	-0.646769
5.51809	-0.635223
5.53059	-0.650113
5.54308	-0.648659
5.55558	-0.640469
5.56808	-0.644605
5.58058	-0.642877
5.59307	-0.634807
5.60557	-0.643818
5.61807	-0.650908
5.63057	-0.655598
5.64306	-0.648211
5.65556	-0.63723
5.66806	-0.641672
5.68056	-0.64653
5.69305	-0.651093
5.70555	-0.637132
5.71805	-0.649815
5.73055	-0.640952
5.74304	-0.647442
5.75554	-0.646527
5.76804	-0.634943
5.78054	-0.636301
5.79303	-0.63459
5.80553	-0.635301
5.81803	-0.644909
5.83052	-0.642934
5.84302	-0.643053
5.85552	-0.641637
5.86802	-0.647836
5.88051	-0.627626
5.89301	-0.649256
5.90551	-0.645366
5.91801	-0.648766
5.9305	-0.635732
5.943	-0.641495
5.9555	-0.652678
5.968	-0.641821
5.98049	-0.641135
5.99299	-0.652705
6.00549	-0.637442
6.01799	-0.644881
6.03048	-0.646973
6.04298	-0.644473
6.05548	-0.645051
6.06798	-0.604929
6.08047	-0.473785
6.09297	-0.382689
6.10547	-0.367006
6.11797	-0.396312
6.13046	-0.447262
6.14296	-0.456866
6.15546	-0.489687
6.16796	-0.485994
6.18045	-0.53311
6.19295	-0.524636
6.20545	-0.564973
6.21795	-0.579359
6.23044	-0.578752
6.24294	-0.590215
6.25544	-0.587084
6.26793	-0.594952
6.28043	-0.605113
6.29293	-0.628126
6.30543	-0.628294
6.31792	-0.632816
6.33042	-0.624421
6.34292	-0.638485
6.35542	-0.642376
6.36791	-0.63159
6.38041	-0.64591
6.39291	-0.646241
6.40541	-0.655471
6.4179	-0.65118
6.4304	-0.643798
6.4429	-0.656431
6.4554	-0.659512
6.46789	-0.643836
6.48039	-0.663692
6.49289	-0.664596
6.50539	-0.680751
6.51788	-0.680122
6.53038	-0.678199
6.54288	-0.670774
6.55538	-0.671269
6.56787	-0.691227
6.58037	-0.694011
6.59287	-0.705034
6.60536	-0.673375
6.61786	-0.677272
6.63036	-0.689194
6.64286	-0.702037
6.65536	-0.690587
6.66785	-0.700129
6.68035	-0.700105
6.69285	-0.708723
6.70535	-0.690531
6.71784	-0.706818
6.73034	-0.707161
6.74284	-0.700355
6.75533	-0.710477
6.76783	-0.701282
6.78033	-0.709631
6.79283	-0.716645
6.80532	-0.719724
6.81782	-0.713237
6.83032	-0.70909
6.84282	-0.706061
6.85531	-0.724661
6.86781	-0.699664
6.88031	-0.739756
6.89281	-0.721481
6.9053	-0.723141
6.9178	-0.701268
6.9303	-0.718188
6.9428	-0.702437
6.95529	-0.711368
6.96779	-0.697982
6.98029	-0.691872
6.99278	-0.703893
7.00528	-0.706186
7.01778	-0.701393
7.03028	-0.70687
7.04277	-0.694216
7.05527	-0.681711
7.06777	-0.643258
7.08027	-0.648773
7.09276	-0.629916
7.10526	-0.620627
7.11776	-0.605597
7.13026	-0.576203
7.14276	-0.548058
7.15525	-0.516416
7.16775	-0.475127
7.18025	-0.405538
7.19274	-0.352529
7.20524	-0.282368
7.21774	-0.210438
7.23024	-0.119289
7.24273	-0.01633
7.25523	0.115521
7.26773	0.221534
7.28023	0.375036
7.29272	0.537681
7.30522	0.734104
7.31772	0.936808
7.33021	1.16452
7.34271	1.42371
7.35521	1.71808
7.36771	2.03479
7.38021	2.37749
7.3927	2.75824
7.4052	3.20521
7.4177	3.66284
7.4302	4.18601
7.44269	4.74307
7.45519	5.32723
7.46769	6.0189
7.48018	6.70435
7.49268	7.47433
7.50518	8.30203
7.51768	9.17503
7.53017	10.118
7.54267	11.0867
7.55517	12.1052
7.56767	13.1895
7.58016	14.2965
7.59266	15.4245
7.60516	16.6048
7.61766	17.8596
7.63015	19.1098
7.64265	20.3704
7.65515	21.691
7.66765	22.9934
7.68014	24.342
7.69264	25.6647
7.70514	27.0211
7.71764	28.4009
7.73013	29.806
7.74263	31.1741
7.75513	32.5648
7.76762	33.9495
7.78012	35.3724
7.79262	36.7977
7.80512	38.1954
7.81761	39.6204
7.83011	41.0649
7.84261	42.5325
7.85511	43.9745
7.86761	45.4308
7.8801	46.8971
7.8926	48.3831
7.9051	49.8325
7.91759	51.3532
7.93009	52.8836
7.94259	54.4604
7.95509	56.0056
7.96758	57.604
7.98008	59.2236
7.99258	60.8775
8.00507	62.5746
8.01757	64.2715
8.03007	66.0777
8.04257	67.958
8.05507	69.9053
8.06756	71.9233
8.08006	74.0464
8.09256	76.2286
8.10506	78.4986
8.11755	80.7499
8.13005	83.0699
8.14255	85.3162
8.15504	87.4982
8.16754	89.5529
8.18004	91.4489
8.19254	93.1564
8.20503	94.7098
8.21753	96.1244
8.23003	97.3496
8.24253	98.4646
8.25502	99.4767
8.26752	100.397
8.28002	101.213
8.29252	101.95
8.30501	102.649
8.31751	103.242
8.33001	103.842
8.34251	104.3
8.355	104.714
8.3675	105.061
8.38	105.285
8.3925	105.4
8.40499	105.362	void volume
8.41749	105.201
8.42999	104.897
8.44249	104.491
8.45498	103.956
8.46748	103.268
8.47998	102.468
8.49248	101.623
8.50497	100.653
8.51747	99.5914
8.52997	98.5249
8.54246	97.4717
8.55496	96.467
8.56746	95.5936
8.57996	94.8498
8.59245	94.2277
8.60495	93.8476
8.61745	93.5814
8.62995	93.4692
8.64245	93.4693
8.65494	93.5996
8.66744	93.7274
8.67994	93.9449
8.69243	94.1048
8.70493	94.2606
8.71743	94.3463
8.72993	94.3611	ADH
8.74242	94.3545
8.75492	94.2611
8.76742	94.1201
8.77992	93.887
8.79241	93.6334
8.80491	93.3159
8.81741	92.9529
8.82991	92.5539
8.8424	92.0858
8.8549	91.5978
8.8674	91.0229
8.87989	90.384
8.89239	89.6845
8.90489	88.8731
8.91739	87.9453
8.92989	86.931
8.94238	85.7506
8.95488	84.4271
8.96738	82.9567
8.97987	81.3654
8.99237	79.5939
9.00487	77.6654
9.01737	75.5933
9.02986	73.4479
9.04236	71.1693
9.05486	68.8183
9.06736	66.4139
9.07985	63.9853
9.09235	61.5048
9.10485	59.0929
9.11735	56.628
9.12984	54.2534
9.14234	51.9966
9.15484	49.7771
9.16734	47.6696
9.17983	45.6538
9.19233	43.8049
9.20483	42.0063
9.21733	40.3698
9.22982	38.8228
9.24232	37.4405
9.25482	36.1658
9.26731	34.9717
9.27981	33.9426
9.29231	33.0077
9.30481	32.155
9.3173	31.4356
9.3298	30.7938
9.3423	30.238
9.3548	29.7851
9.36729	29.371
9.37979	29.0724
9.39229	28.8202
9.40479	28.6037
9.41728	28.4589
9.42978	28.3644
9.44228	28.294
9.45478	28.2413
9.46727	28.2381
9.47977	28.2531
9.49227	28.2795
9.50477	28.3525
9.51726	28.379
9.52976	28.4638
9.54226	28.5678
9.55476	28.6523
9.56725	28.7268
9.57975	28.8474
9.59225	28.9043
9.60475	29.005
9.61724	29.0926
9.62974	29.1437
9.64224	29.2028
9.65474	29.239
9.66723	29.2553	BSA
9.67973	29.2526
9.69223	29.2017
9.70472	29.1215
9.71722	28.9999
9.72972	28.8115
9.74222	28.6045
9.75471	28.3184
9.76721	28.0083
9.77971	27.644
9.79221	27.2005
9.80471	26.7285
9.8172	26.2044
9.8297	25.6492
9.8422	25.0412
9.85469	24.4091
9.86719	23.7111
9.87969	23.0293
9.89219	22.3347
9.90468	21.6258
9.91718	20.8971
9.92968	20.1857
9.94218	19.4972
9.95467	18.8127
9.96717	18.1283
9.97967	17.4733
9.99217	16.8625
10.0047	16.2445
10.0172	15.6703
10.0297	15.0927
10.0422	14.5804
10.0547	14.0773
10.0671	13.5345
10.0796	13.0502
10.0921	12.5786
10.1046	12.1307
10.1171	11.702
10.1296	11.2662
10.1421	10.8706
10.1546	10.4859
10.1671	10.1255
10.1796	9.75296
10.1921	9.38983
10.2046	9.05903
10.2171	8.73659
10.2296	8.38918
10.2421	8.09614
10.2546	7.78949
10.2671	7.52229
10.2796	7.23604
10.2921	6.97352
10.3046	6.71659
10.3171	6.50083
10.3296	6.26169
10.3421	6.03824
10.3546	5.8295
10.3671	5.63822
10.3796	5.43429
10.3921	5.25698
10.4046	5.08082
10.4171	4.91812
10.4296	4.77363
10.4421	4.61627
10.4546	4.46406
10.4671	4.3597
10.4796	4.22726
10.4921	4.09219
10.5046	3.98006
10.5171	3.89126
10.5296	3.77846
10.5421	3.6774
10.5545	3.5956
10.567	3.48936
10.5795	3.42083
10.592	3.35219
10.6045	3.29302
10.617	3.21744
10.6295	3.15083
10.642	3.09342
10.6545	3.05922
10.667	3.00431
10.6795	2.96481
10.692	2.94609
10.7045	2.94998
10.717	2.89532
10.7295	2.90207
10.742	2.89387
10.7545	2.89349
10.767	2.8977
10.7795	2.91129
10.792	2.9402
10.8045	2.96868
10.817	3.00104
10.8295	3.03439
10.842	3.06314
10.8545	3.11384
10.867	3.14879
10.8795	3.19493
10.892	3.26936
10.9045	3.30938
10.917	3.34591
10.9295	3.38009
10.942	3.43537
10.9545	3.49335
10.967	3.54216
10.9795	3.58942
10.992	3.60104
11.0045	3.65315
11.017	3.68486
11.0295	3.71646
11.0419	3.73177
11.0544	3.74361
11.0669	3.75754
11.0794	3.75713
11.0919	3.75959
11.1044	3.75413
11.1169	3.73504
11.1294	3.72795
11.1419	3.68861
11.1544	3.65437
11.1669	3.60453
11.1794	3.57707
11.1919	3.50533
11.2044	3.44747
11.2169	3.37379
11.2294	3.30686
11.2419	3.20982
11.2544	3.14061
11.2669	3.06705
11.2794	2.97319
11.2919	2.87353
11.3044	2.79292
11.3169	2.69065
11.3294	2.60677
11.3419	2.51914
11.3544	2.45472
11.3669	2.35751
11.3794	2.27986
11.3919	2.21612
11.4044	2.16055
11.4169	2.11499
11.4294	2.059
11.4419	2.00997
11.4544	2.00043
11.4669	1.9803
11.4794	1.99187
11.4919	2.01435
11.5044	2.07671
11.5169	2.18557
11.5293	2.30964
11.5418	2.47339
11.5543	2.68122
11.5668	2.9453
11.5793	3.2911
11.5918	3.71309
11.6043	4.2198
11.6168	4.86281
11.6293	5.56781
11.6418	6.43718
11.6543	7.40343
11.6668	8.56837
11.6793	9.87587
11.6918	11.3722
11.7043	13.0135
11.7168	14.8515
11.7293	16.8637
11.7418	19.0858
11.7543	21.4401
11.7668	24.0334
11.7793	26.7939
11.7918	29.7158
11.8043	32.7725
11.8168	35.9462
11.8293	39.2119
11.8418	42.5764
11.8543	46.0142
11.8668	49.4356
11.8793	52.9137
11.8918	56.4454
11.9043	59.9094
11.9168	63.2741
11.9293	66.586
11.9418	69.7567
11.9543	72.8267
11.9668	75.6927
11.9793	78.4809
11.9918	81.0575
12.0043	83.4435
12.0167	85.5881
12.0292	87.4804
12.0417	89.1313
12.0542	90.526
12.0667	91.653
12.0792	92.4644
12.0917	93.0016
12.1042	93.181	carbonic annyhdrase
12.1167	93.1029
12.1292	92.6948
12.1417	91.9495
12.1542	90.8975
12.1667	89.5819
12.1792	87.9604
12.1917	86.0168
12.2042	83.8712
12.2167	81.4598
12.2292	78.8339
12.2417	76.0519
12.2542	73.1245
12.2667	70.0808
12.2792	66.9332
12.2917	63.7887
12.3042	60.5644
12.3167	57.347
12.3292	54.1305
12.3417	51.0286
12.3542	47.9745
12.3667	44.9954
12.3792	42.1623
12.3917	39.4117
12.4042	36.8247
12.4167	34.3346
12.4292	31.9473
12.4417	29.7169
12.4542	27.6754
12.4667	25.7232
12.4792	23.8792
12.4916	22.1718
12.5041	20.6522
12.5166	19.1425
12.5291	17.7858
12.5416	16.5384
12.5541	15.3929
12.5666	14.3502
12.5791	13.3457
12.5916	12.4443
12.6041	11.6284
12.6166	10.9037
12.6291	10.1982
12.6416	9.56143
12.6541	8.97038
12.6666	8.4819
12.6791	7.99109
12.6916	7.57406
12.7041	7.17255
12.7166	6.82383
12.7291	6.49601
12.7416	6.18868
12.7541	5.9261
12.7666	5.70368
12.7791	5.47413
12.7916	5.29139
12.8041	5.09658
12.8166	4.93885
12.8291	4.77867
12.8416	4.66194
12.8541	4.52316
12.8666	4.40045
12.8791	4.29149
12.8916	4.2043
12.9041	4.11476
12.9166	4.03422
12.9291	3.94729
12.9416	3.84867
12.9541	3.78437
12.9666	3.7343
12.9791	3.66289
12.9915	3.58882
13.004	3.53098
13.0165	3.47919
13.029	3.38863
13.0415	3.33438
13.054	3.26024
13.0665	3.21132
13.079	3.15711
13.0915	3.07578
13.104	3.0238
13.1165	2.96732
13.129	2.92298
13.1415	2.8506
13.154	2.80883
13.1665	2.74838
13.179	2.67773
13.1915	2.62341
13.204	2.60056
13.2165	2.52541
13.229	2.46233
13.2415	2.39922
13.254	2.35726
13.2665	2.29103
13.279	2.24581
13.2915	2.19075
13.304	2.15761
13.3165	2.10882
13.329	2.069
13.3415	2.00664
13.354	1.96007
13.3665	1.91222
13.379	1.89155
13.3915	1.85497
13.404	1.79445
13.4165	1.74651
13.429	1.73687
13.4415	1.68232
13.454	1.64831
13.4664	1.63729
13.4789	1.58788
13.4914	1.56965
13.5039	1.55513
13.5164	1.52383
13.5289	1.51358
13.5414	1.48641
13.5539	1.47724
13.5664	1.4807
13.5789	1.48181
13.5914	1.47683
13.6039	1.48703
13.6164	1.48676
13.6289	1.51718
13.6414	1.53189
13.6539	1.58661
13.6664	1.59221
13.6789	1.66715
13.6914	1.72285
13.7039	1.77094
13.7164	1.87429
13.7289	1.97319
13.7414	2.10708
13.7539	2.2552
13.7664	2.42324
13.7789	2.61461
13.7914	2.83433
13.8039	3.10194
13.8164	3.41585
13.8289	3.7579
13.8414	4.15428
13.8539	4.61609
13.8664	5.14188
13.8789	5.7162
13.8914	6.37772
13.9039	7.12134
13.9164	7.96488
13.9289	8.87134
13.9414	9.88975
13.9538	10.9891
13.9663	12.1702
13.9788	13.4657
13.9913	14.8508
14.0038	16.298
14.0163	17.8591
14.0288	19.5132
14.0413	21.2202
14.0538	22.9903
14.0663	24.8391
14.0788	26.7175
14.0913	28.6257
14.1038	30.5416
14.1163	32.4995
14.1288	34.4358
14.1413	36.3841
14.1538	38.2804
14.1663	40.1082
14.1788	41.9068
14.1913	43.6157
14.2038	45.247
14.2163	46.7786
14.2288	48.2376
14.2413	49.5775
14.2538	50.7911
14.2663	51.8292
14.2788	52.7624
14.2913	53.5363
14.3038	54.1402
14.3163	54.5896
14.3288	54.8611
14.3413	54.9625	cytochrome c
14.3538	54.8907
14.3663	54.6374
14.3788	54.2167
14.3913	53.6354
14.4038	52.8548
14.4163	51.9078
14.4288	50.8561
14.4412	49.6204
14.4537	48.2702
14.4662	46.7457
14.4787	45.2027
14.4912	43.528
14.5037	41.795
14.5162	39.9941
14.5287	38.1643
14.5412	36.3241
14.5537	34.4746
14.5662	32.5894
14.5787	30.7587
14.5912	28.9894
14.6037	27.2356
14.6162	25.5258
14.6287	23.9069
14.6412	22.3709
14.6537	20.8683
14.6662	19.4611
14.6787	18.0835
14.6912	16.8247
14.7037	15.6124
14.7162	14.5088
14.7287	13.4724
14.7412	12.4802
14.7537	11.5934
14.7662	10.7397
14.7787	9.96938
14.7912	9.24639
14.8037	8.56776
14.8162	7.96886
14.8287	7.40438
14.8412	6.87714
14.8537	6.40325
14.8662	5.97581
14.8787	5.57484
14.8912	5.20878
14.9037	4.8697
14.9161	4.56392
14.9286	4.28302
14.9411	4.0323
14.9536	3.79894
14.9661	3.59148
14.9786	3.3919
14.9911	3.21171
15.0036	3.06495
15.0161	2.90839
15.0286	2.78019
15.0411	2.65958
15.0536	2.52836
15.0661	2.41963
15.0786	2.31795
15.0911	2.23661
15.1036	2.14498
15.1161	2.0464
15.1286	1.98296
15.1411	1.90722
15.1536	1.86381
15.1661	1.8135
15.1786	1.73706
15.1911	1.69175
15.2036	1.62984
15.2161	1.5951
15.2286	1.53598
15.2411	1.4896
15.2536	1.44166
15.2661	1.4003
15.2786	1.36358
15.2911	1.30834
15.3036	1.28082
15.3161	1.24703
15.3286	1.2154
15.3411	1.18272
15.3536	1.13322
15.3661	1.11976
15.3786	1.09424
15.3911	1.05169
15.4035	1.01933
15.416	0.994654
15.4285	0.962542
15.441	0.953684
15.4535	0.921655
15.466	0.911795
15.4785	0.876403
15.491	0.852094
15.5035	0.836903
15.516	0.813264
15.5285	0.779086
15.541	0.781285
15.5535	0.749469
15.566	0.732228
15.5785	0.723695
15.591	0.688382
15.6035	0.692175
15.616	0.672011
15.6285	0.633299
15.641	0.634656
15.6535	0.608714
15.666	0.606671
15.6785	0.605673
15.691	0.595201
15.7035	0.57451
15.716	0.589434
15.7285	0.564797
15.741	0.540162
15.7535	0.540272
15.766	0.52996
15.7785	0.530006
15.791	0.524531
15.8035	0.499269
15.816	0.514407
15.8285	0.521456
15.841	0.489592
15.8535	0.502277
15.866	0.504133
15.8785	0.513108
15.8909	0.504962
15.9034	0.507079
15.9159	0.493195
15.9284	0.528274
15.9409	0.509688
15.9534	0.511532
15.9659	0.525202
15.9784	0.541706
15.9909	0.534754
16.0034	0.555995
16.0159	0.538036
16.0284	0.563258
16.0409	0.552598
16.0534	0.565576
16.0659	0.577483
16.0784	0.586557
16.0909	0.607131
16.1034	0.615655
16.1159	0.61977
16.1284	0.642917
16.1409	0.637224
16.1534	0.653032
16.1659	0.670183
16.1784	0.675301
16.1909	0.67193
16.2034	0.685117
16.2159	0.712354
16.2284	0.725073
16.2409	0.715886
16.2534	0.717533
16.2659	0.739605
16.2784	0.733365
16.2909	0.750054
16.3034	0.753499
16.3159	0.76123
16.3284	0.751557
16.3409	0.76494
16.3534	0.762509
16.3658	0.759145
16.3783	0.758096
16.3908	0.7453
16.4033	0.754821
16.4158	0.753236
16.4283	0.740206
16.4408	0.743113
16.4533	0.718369
16.4658	0.714318
16.4783	0.710213
16.4908	0.696301
16.5033	0.679928
16.5158	0.667572
16.5283	0.665178
16.5408	0.648393
16.5533	0.632945
16.5658	0.616324
16.5783	0.620939
16.5908	0.5955
16.6033	0.58433
16.6158	0.556238
16.6283	0.51599
16.6408	0.513197
16.6533	0.484258
16.6658	0.472399
16.6783	0.45549
16.6908	0.426832
16.7033	0.410724
16.7158	0.403781
16.7283	0.379396
16.7408	0.355467
16.7533	0.339561
16.7658	0.312135
16.7783	0.30557
16.7908	0.278352
16.8033	0.262927
16.8158	0.243045
16.8283	0.237717
16.8408	0.225342
16.8533	0.195596
16.8657	0.183452
16.8782	0.168659
16.8907	0.162428
16.9032	0.143594
16.9157	0.133667
16.9282	0.107732
16.9407	0.098325
16.9532	0.098122
16.9657	0.086796
16.9782	0.059655
16.9907	0.062438
17.0032	0.056546
17.0157	0.037153
17.0282	0.046967
17.0407	0.054598
17.0532	0.036861
17.0657	0.017185
17.0782	0.013635
17.0907	0.018674
17.1032	0.018324
17.1157	-0.003533
17.1282	0.003718
17.1407	0.007857
17.1532	-0.004892
17.1657	-0.001828
17.1782	0.016539
17.1907	-0.004753
17.2032	0.001613
17.2157	0.02226
17.2282	0.025156
17.2407	0.019371
17.2532	0.029358
17.2657	0.026893
17.2782	0.0299
17.2907	0.048045
17.3032	0.047282
17.3157	0.04299
17.3282	0.043184
17.3407	0.04975
17.3531	0.060024
17.3656	0.064466
17.3781	0.0777
17.3906	0.088822
17.4031	0.078738
17.4156	0.088769
17.4281	0.103483
17.4406	0.10228
17.4531	0.097062
17.4656	0.099378
17.4781	0.117927
17.4906	0.110616
17.5031	0.128154
17.5156	0.120189
17.5281	0.12967
17.5406	0.140402
17.5531	0.128573
17.5656	0.147886
17.5781	0.146028
17.5906	0.122635
17.6031	0.144295
17.6156	0.131484
17.6281	0.138538
17.6406	0.140919
17.6531	0.151227
17.6656	0.136825
17.6781	0.130714
17.6906	0.126659
17.7031	0.148301
17.7156	0.136703
17.7281	0.138382
17.7406	0.153257
17.7531	0.151057
17.7656	0.159538
17.7781	0.147906
17.7906	0.164946
17.8031	0.147064
17.8156	0.171452
17.828	0.166287
17.8405	0.152738
17.853	0.17374
17.8655	0.191868
17.878	0.180535
17.8905	0.200347
17.903	0.202343
17.9155	0.212078
17.928	0.219649
17.9405	0.225618
17.953	0.232782
17.9655	0.23681
17.978	0.258974
17.9905	0.252965
18.003	0.264564
18.0155	0.26648
18.028	0.285053
18.0405	0.295996
18.053	0.299404
18.0655	0.31955
18.078	0.334778
18.0905	0.318569
18.103	0.33337
18.1155	0.347104
18.128	0.366177
18.1405	0.379147
18.153	0.364637
18.1655	0.388331
18.178	0.404383
18.1905	0.408683
18.203	0.422372
18.2155	0.423419
18.228	0.41895
18.2405	0.429801
18.253	0.454639
18.2655	0.454815
18.278	0.485942
18.2905	0.50964
18.303	0.518999
18.3154	0.497127
18.3279	0.576031
18.3404	0.534073
18.3529	0.569241
18.3654	0.588634
18.3779	0.609781
18.3904	0.634413
18.4029	0.657552
18.4154	0.681077
18.4279	0.703867
18.4404	0.716833
18.4529	0.739574
18.4654	0.769216
18.4779	0.771966
18.4904	0.816155
18.5029	0.835431
18.5154	0.835418
18.5279	0.860187
18.5404	0.898809
18.5529	0.908761
18.5654	0.921756
18.5779	0.931219
18.5904	0.952604
18.6029	0.9741
18.6154	0.97453
18.6279	0.980962
18.6404	0.976546
18.6529	0.987238
18.6654	0.999417
18.6779	0.986677
18.6904	0.992025
18.7029	0.972178
18.7154	0.977195
18.7279	0.982768
18.7404	0.982333
18.7529	0.970968
18.7654	0.994526
18.7779	0.963115
18.7904	0.953
18.8028	0.966739
18.8153	0.965744
18.8278	0.97717
18.8403	0.968819
18.8528	0.958561
18.8653	0.960082
18.8778	0.955602
18.8903	0.934204
18.9028	0.944932
18.9153	0.955146
18.9278	0.957525
18.9403	0.952998
18.9528	0.947635
18.9653	0.946767
18.9778	0.947398
18.9903	0.953291
19.0028	0.972166
19.0153	0.981072
19.0278	0.979555
19.0403	0.988724
19.0528	0.990505
19.0653	0.986641
19.0778	0.975902
19.0903	1.0096
19.1028	0.984811
19.1153	0.99486
19.1278	0.991106
19.1403	0.984481
19.1528	0.945192
19.1653	0.937558
19.1778	0.917925
19.1903	0.88136
19.2028	0.82673
19.2153	0.748637
19.2278	0.68367
19.2403	0.590998
19.2528	0.501038
19.2653	0.382036
19.2778	0.246282
19.2902	0.091866
19.3027	-0.072437
19.3152	-0.277388
19.3277	-0.45745
19.3402	-0.687987
19.3527	-0.950707
19.3652	-1.21884
19.3777	-1.45929
19.3902	-1.76258
19.4027	-2.0914
19.4152	-2.3949
19.4277	-2.72813
19.4402	-3.06635
19.4527	-3.35671
19.4652	-3.68628
19.4777	-3.9921
19.4902	-4.29439
19.5027	-4.54509
19.5152	-4.81504
19.5277	-5.04169
19.5402	-5.25783
19.5527	-5.3996
19.5652	-5.54577
19.5777	-5.62635
19.5902	-5.71922
19.6027	-5.78841
19.6152	-5.82034
19.6277	-5.84051
19.6402	-5.82076
19.6527	-5.75191
19.6652	-5.70068
19.6777	-5.619
19.6902	-5.56841
19.7027	-5.49757
19.7152	-5.4754
19.7277	-5.46991
19.7402	-5.50113
19.7527	-5.58624
19.7651	-5.65793
19.7776	-5.76134
19.7901	-5.85744
19.8026	-5.94784
19.8151	-5.99866
19.8276	-6.05643
19.8401	-6.08494
19.8526	-6.08485
19.8651	-6.08487
19.8776	-6.06311
19.8901	-6.00612
19.9026	-5.91907
19.9151	-5.79293
19.9276	-5.66625
19.9401	-5.50734
19.9526	-5.32946
19.9651	-5.13943
19.9776	-4.9486
19.9901	-4.79047
20.0026	-4.60846
20.0151	-4.48753
20.0276	-4.36384
20.0401	-4.26438
20.0526	-4.17267
20.0651	-4.09621
20.0776	-4.02451
20.0901	-3.97096
20.1026	-3.91404
20.1151	-3.85372
20.1276	-3.79704
20.1401	-3.76038
20.1526	-3.70309
20.1651	-3.65725
20.1776	-3.59826
20.1901	-3.54761
20.2026	-3.50706
20.2151	-3.47198
20.2276	-3.40626
20.2401	-3.34875
20.2525	-3.32062
20.265	-3.25527
20.2775	-3.20784
20.29	-3.13725
20.3025	-3.08261
20.315	-3.03863
20.3275	-2.98286
20.34	-2.91718
20.3525	-2.85415
20.365	-2.76534
20.3775	-2.72421
20.39	-2.65095
20.4025	-2.59694
20.415	-2.54
20.4275	-2.49718
20.44	-2.4649
20.4525	-2.41591
20.465	-2.38621
20.4775	-2.31261
20.49	-2.30365
20.5025	-2.25705
20.515	-2.22851
20.5275	-2.18308
20.54	-2.16273
20.5525	-2.11385
20.565	-2.07456
20.5775	-2.01298
20.59	-1.96828
20.6025	-1.9328
20.615	-1.8636
20.6275	-1.82208
20.64	-1.78252
20.6525	-1.72245
20.665	-1.68359
20.6775	-1.65172
20.69	-1.59211
20.7025	-1.54472
20.715	-1.48785
20.7275	-1.46249
20.7399	-1.40694
20.7524	-1.35992
20.7649	-1.31641
20.7774	-1.29643
20.7899	-1.21982
20.8024	-1.18321
20.8149	-1.1494
20.8274	-1.11646
20.8399	-1.07426
20.8524	-1.0394
20.8649	-0.996473
20.8774	-0.930051
20.8899	-0.901561
20.9024	-0.883494
20.9149	-0.822243
20.9274	-0.814618
20.9399	-0.771729
20.9524	-0.742913
20.9649	-0.704009
20.9774	-0.674173
20.9899	-0.64817
21.0024	-0.634467
21.0149	-0.603778
21.0274	-0.592286
21.0399	-0.571604
21.0524	-0.562676
21.0649	-0.541094
21.0774	-0.521157
21.0899	-0.503598
21.1024	-0.504622
21.1149	-0.479379
21.1274	-0.461936
21.1399	-0.45522
21.1524	-0.456066
21.1649	-0.444515
21.1774	-0.448191
21.1899	-0.466547
21.2024	-0.462805
21.2148	-0.465709
21.2273	-0.474414
21.2398	-0.48023
21.2523	-0.473467
21.2648	-0.469021
21.2773	-0.461831
21.2898	-0.449695
21.3023	-0.433966
21.3148	-0.402509
21.3273	-0.399643
21.3398	-0.370652
21.3523	-0.354719
21.3648	-0.327769
21.3773	-0.31341
21.3898	-0.303242
21.4023	-0.28523
21.4148	-0.281545
21.4273	-0.296274
21.4398	-0.312321
21.4523	-0.319396
21.4648	-0.336089
21.4773	-0.3661
21.4898	-0.38831
21.5023	-0.418259
21.5148	-0.456911
21.5273	-0.493727
21.5398	-0.501092
21.5523	-0.554952
21.5648	-0.602751
21.5773	-0.616776
21.5898	-0.642422
21.6023	-0.672344
21.6148	-0.719021
21.6273	-0.751903
21.6398	-0.785645
21.6523	-0.821182
21.6648	-0.855443
21.6773	-0.884894
21.6898	-0.938249
21.7022	-0.949213
21.7147	-0.971391
21.7272	-1.03575
21.7397	-1.07666
21.7522	-1.08903
21.7647	-1.15747
21.7772	-1.18674
21.7897	-1.2187
21.8022	-1.24488
21.8147	-1.27403
21.8272	-1.30026
21.8397	-1.35124
21.8522	-1.38673
21.8647	-1.42265
21.8772	-1.44037
21.8897	-1.46823
21.9022	-1.51145
21.9147	-1.55396
21.9272	-1.57643
21.9397	-1.62315
21.9522	-1.63771
21.9647	-1.67711
21.9772	-1.72383
21.9897	-1.75154
22.0022	-1.78599
22.0147	-1.83113
22.0272	-1.8698
22.0397	-1.89662
22.0522	-1.95268
22.0647	-1.99587
22.0772	-2.03617
22.0897	-2.05711
22.1022	-2.12075
22.1147	-2.13838
22.1272	-2.19272
22.1397	-2.23318
22.1522	-2.268
22.1647	-2.31406
22.1772	-2.3292
22.1897	-2.35675
22.2021	-2.39961
22.2146	-2.40949
22.2271	-2.47192
22.2396	-2.48379
22.2521	-2.52098
22.2646	-2.53309
22.2771	-2.55486
22.2896	-2.57789
22.3021	-2.57488
22.3146	-2.59503
22.3271	-2.61157
22.3396	-2.62787
22.3521	-2.62757
22.3646	-2.64973
22.3771	-2.64687
22.3896	-2.67314
22.4021	-2.66315
22.4146	-2.68083
22.4271	-2.66915
22.4396	-2.68342
22.4521	-2.69057
22.4646	-2.68936
22.4771	-2.69171
22.4896	-2.66163
22.5021	-2.6997
22.5146	-2.68584
22.5271	-2.67419
22.5396	-2.69625
22.5521	-2.69279
22.5646	-2.66946
22.5771	-2.68736
22.5896	-2.67089
22.6021	-2.66857
22.6146	-2.65687
22.6271	-2.64009
22.6396	-2.64291
22.6521	-2.63682
22.6646	-2.62833
22.677	-2.63474
22.6895	-2.62136
22.702	-2.61681
22.7145	-2.63476
22.727	-2.6058
22.7395	-2.61181
22.752	-2.59935
22.7645	-2.59692
22.777	-2.57177
22.7895	-2.57995
22.802	-2.58042
22.8145	-2.58572
22.827	-2.57641
22.8395	-2.57336
22.852	-2.57384
22.8645	-2.56036
22.877	-2.56162
22.8895	-2.54111
22.902	-2.53477
22.9145	-2.52774
22.927	-2.52161
22.9395	-2.51933
22.952	-2.51829
22.9645	-2.51899
22.977	-2.50909
22.9895	-2.50645
23.002	-2.52906
23.0145	-2.49889
23.027	-2.51254
23.0395	-2.50129
23.052	-2.48533
23.0645	-2.49595
23.077	-2.47903
23.0895	-2.47901
23.102	-2.47935
23.1145	-2.4718
23.127	-2.45991
23.1395	-2.46084
23.152	-2.452
23.1644	-2.46235
23.1769	-2.4371
23.1894	-2.43125
23.2019	-2.44099
23.2144	-2.43989
23.2269	-2.43834
23.2394	-2.42602
23.2519	-2.41805
23.2644	-2.40694
23.2769	-2.40902
23.2894	-2.39559
23.3019	-2.36632
23.3144	-2.38199
23.3269	-2.3616
23.3394	-2.37397
23.3519	-2.32986
23.3644	-2.32741
23.3769	-2.33559
23.3894	-2.32603
23.4019	-2.31404
23.4144	-2.31495
23.4269	-2.29061
23.4394	-2.31349
23.4519	-2.28992
23.4644	-2.27235
23.4769	-2.28001
23.4894	-2.28047
23.5019	-2.29755
23.5144	-2.25015
23.5269	-2.22981
23.5394	-2.24327
23.5519	-2.22144
23.5644	-2.2263
23.5769	-2.2248
23.5894	-2.20822
23.6019	-2.20019
23.6144	-2.20639
23.6269	-2.19963
23.6393	-2.19845
23.6518	-2.18709
23.6643	-2.16073
23.6768	-2.16722
23.6893	-2.17515
23.7018	-2.1421
23.7143	-2.12841
23.7268	-2.1443
23.7393	-2.1293
23.7518	-2.13723
23.7643	-2.11802
23.7768	-2.11323
23.7893	-2.10937
23.8018	-2.11281
23.8143	-2.08468
23.8268	-2.08385
23.8393	-2.07657
23.8518	-2.07154
23.8643	-2.05759
23.8768	-2.0523
23.8893	-2.04921
23.9018	-2.03718
23.9143	-2.01251
23.9268	-2.02824
23.9393	-2.02097
23.9518	-2.00751
23.9643	-2.00612
23.9768	-1.99785
23.9893	-1.98488
24.0018	-1.99016
24.0143	-1.98343
24.0268	-1.97221
24.0393	-1.96832
24.0518	-1.9772
24.0643	-1.97508
24.0768	-1.96194
24.0893	-1.96893
24.1018	-1.97394
24.1143	-1.98731
24.1267	-1.98101
24.1392	-1.96694
24.1517	-1.98011
24.1642	-1.98696
24.1767	-1.9928
24.1892	-1.99095
24.2017	-2.00033
24.2142	-1.99986
24.2267	-1.98352
24.2392	-2.00097
24.2517	-2.0113
24.2642	-2.00513
24.2767	-2.01162
24.2892	-2.02031
24.3017	-2.03139
24.3142	-2.04571
24.3267	-2.05033
24.3392	-2.06843
24.3517	-2.05133
24.3642	-2.04847
24.3767	-2.05266
24.3892	-2.05381
24.4017	-2.04996
24.4142	-2.07927
24.4267	-2.06514
24.4392	-2.06843
24.4517	-2.05863
24.4642	-2.04653
24.4767	-2.04773
24.4892	-2.06
24.5017	-2.04249
24.5142	-2.02665
24.5267	-2.03133
24.5392	-2.01976
24.5517	-1.99971
24.5642	-1.97325
24.5767	-1.96507
24.5892	-1.95495
24.6017	-1.91741
24.6141	-1.91974
24.6266	-1.89746
24.6391	-1.87244
24.6516	-1.86401
24.6641	-1.81696
24.6766	-1.81193
24.6891	-1.79516
24.7016	-1.7721
24.7141	-1.74511
24.7266	-1.72088
24.7391	-1.70314
24.7516	-1.66756
24.7641	-1.63119
24.7766	-1.61305
24.7891	-1.59981
24.8016	-1.56671
24.8141	-1.54859
24.8266	-1.51512
24.8391	-1.48784
24.8516	-1.44512
24.8641	-1.40555
24.8766	-1.38621
24.8891	-1.34694
24.9016	-1.31442
24.9141	-1.26761
24.9266	-1.22035
24.9391	-1.13833
24.9516	-1.07373
24.9641	-1.04968
[truncated: 19 more rows]

## Sheet: Standard Curve
		Ve of Mw standard
		7.5	Blue dextran, void volume
		8.72993	alcohol dehyrdorgenase
		9.66723	BSA
		12.1042	carbonic annhydrase
		14.3413	cytochrome c
		Ve/Vo			MW (kDa)	Log (MW)	Ve/Vo
		1.28896	BSA		66	1.81954	1.28896	-0.857989	slope
		1.6139	carbonic annhydrase		29	1.4624	1.6139	2.85635	intercept
		1.91217	cytochrome c		12.4	1.09342	1.91217
		new FKBP-ICD SD75 measurement
		Ve	Ve/Vo	Log Mw	Mw
		11.4	1.52	1.55754	36.1023
		Previous SD75 measurement						Normalized between columns
			Ve	Ve/Vo	Log Mw	Mw		Log Mw	Mw
		monomer	11.1398	1.4853	1.59798	39.6258		1.55754	36.1023
		dimer	9.59846	1.27979	1.8375	68.7858		1.79706	62.6695
		theoretical		Mw	kDa
		GB1-FKBP-ICD		26297.5	26.2975
		GB1-FRB-ICD		26618.9	26.6189
		Dimer ICD		52916.4	52.9164

## Sheet: FF ICD Curves
F/F-ICD + Rapamycin					F/F-ICD + DMSO					GB1-FKBP-HPO30 + DMSO
mL	mAU				mL	mAU				mL	mAU
0.000881	-0.000411				-0.003135	0				-0.005772	1.65591
0.026875	0.011861				0.021849	0.012221				0.006725	-0.052221
0.050869	0.007752				0.046833	-0.058594				0.019222	-0.068998
0.076862	0.026503				0.071817	-0.074274				0.031719	0.013795
0.100857	0.023135				0.096801	0.597768				0.044216	0.115443
0.12685	0.076649				0.121785	0.954339				0.056714	0.294963
0.150845	0.102102				0.146769	1.00622				0.069211	0.5069
0.176838	0.098701				0.171753	0.87148				0.081708	0.932538
0.200832	0.099904				0.196737	0.782626				0.094205	2.52595
0.226826	0.104795				0.221721	0.716507				0.106702	3.78535
0.25082	0.098285				0.246706	0.652857				0.1192	4.92144
0.276814	0.118627				0.27169	0.593527				0.131697	5.82836
0.300808	0.127296				0.296674	0.558882				0.144194	6.37871
0.326801	0.135527				0.321658	0.504444				0.156691	6.59904
0.350792	0.147668				0.346642	0.447363				0.169188	6.75243
0.376785	0.139609				0.371626	0.414428				0.181685	6.84445
0.40078	0.139706				0.39661	0.383631				0.194183	6.87767
0.426773	0.155261				0.421594	0.366759				0.20668	6.90549
0.450768	0.168142				0.446578	0.328777				0.219177	6.90763
0.476761	0.17001				0.471562	0.297846				0.231674	6.87531
0.500755	0.173488				0.496546	0.277841				0.244171	6.83551
0.526749	0.167062				0.52153	0.235981				0.256669	6.78488
0.550743	0.178779				0.546514	0.208822				0.269166	6.7232
0.576736	0.184985				0.571498	0.191959				0.281663	6.63379
0.600731	0.191183				0.596482	0.143952				0.29416	6.5313
0.626724	0.191741				0.621466	0.156682				0.306657	6.40922
0.650719	0.206948				0.64645	0.128524				0.319155	6.3175
0.676712	0.21105				0.671435	0.121726				0.331652	6.24051
0.700706	0.213487				0.696419	0.083652				0.344149	6.15694
0.7267	0.222087				0.721403	0.071398				0.356646	6.03959
0.750694	0.219275				0.746387	0.065835				0.369143	5.98302
0.776688	0.229281				0.771371	0.030385				0.38164	5.89568
0.800678	0.224163				0.796355	0.039191				0.394138	5.84289
0.826675	0.232514				0.821339	0.033897				0.406635	5.77425
0.850666	0.234895				0.846323	-0.00562				0.419132	5.6905
0.876659	0.243922				0.871307	0.003957				0.431629	5.62707
0.900654	0.264932				0.896291	-0.019031				0.444126	5.54504
0.926647	0.246545				0.921275	-0.025549				0.456624	5.49891
0.950642	0.239713				0.946259	-0.019757				0.469121	5.42719
0.976635	0.253278				0.971243	-0.037602				0.481618	5.36012
1.00063	0.257793				0.996227	-0.050793				0.494115	5.27904
1.02662	0.260352				1.02121	-0.047675				0.506612	5.18743
1.05062	0.265394				1.04619	-0.05679				0.51911	5.09133
1.07661	0.265743				1.07118	-0.057593				0.531607	5.01069
1.10061	0.266723				1.09616	-0.069285				0.544104	4.92521
1.1266	0.270748				1.12115	-0.049675				0.556601	4.82899
1.15059	0.27421				1.14613	-0.08103				0.569098	4.74137
1.17659	0.267298				1.17112	-0.08559				0.581595	4.67048
1.20058	0.278265				1.1961	-0.082671				0.594093	4.56281
1.22657	0.267415				1.22108	-0.07538				0.60659	4.48717
1.25057	0.277369				1.24607	-0.092548				0.619087	4.42238
1.27656	0.26652				1.27105	-0.106706				0.631584	4.31691
1.30055	0.271928				1.29604	-0.099008				0.644081	4.24498
1.32655	0.283152				1.32102	-0.090465				0.656579	4.19161
1.35054	0.272168				1.346	-0.108086				0.669076	4.08334
1.37653	0.2725				1.37099	-0.102738				0.681573	4.00293
1.40053	0.273275				1.39597	-0.108745				0.69407	3.91559
1.42652	0.26874				1.42096	-0.109722				0.706567	3.86239
1.45052	0.257434				1.44594	-0.115803				0.719065	3.77768
1.47651	0.282923				1.47092	-0.104086				0.731562	3.70825
1.5005	0.265022				1.49591	-0.11458				0.744059	3.6172
1.5265	0.28119				1.52089	-0.119783				0.756556	3.53995
1.55049	0.258795				1.54588	-0.127215				0.769053	3.46096
1.57648	0.271454				1.57086	-0.126123				0.78155	3.39973
1.60048	0.270389				1.59584	-0.112443				0.794048	3.32071
1.62647	0.254639				1.62083	-0.096307				0.806545	3.24037
1.65047	0.27099				1.64581	-0.086242				0.819042	3.16893
1.67646	0.254967				1.6708	-0.113457				0.831539	3.11043
1.70046	0.246242				1.69578	-0.096378				0.844036	3.01709
1.72645	0.23266				1.72077	-0.128504				0.856534	2.94576
1.75044	0.243669				1.74575	-0.108754				0.869031	2.88139
1.77643	0.245625				1.77073	-0.113719				0.881528	2.80357
1.80043	0.232099				1.79572	-0.111418				0.894025	2.71502
1.82642	0.224033				1.8207	-0.116092				0.906522	2.66497
1.85041	0.228391				1.84569	-0.116769				0.91902	2.60442
1.87641	0.225724				1.87067	-0.118612				0.931517	2.50181
1.9004	0.215211				1.89565	-0.111429				0.944014	2.43861
1.9264	0.190835				1.92064	-0.113716				0.956511	2.37029
1.95039	0.213938				1.94562	-0.116288				0.969008	2.27628
1.97638	0.193768				1.9706	-0.11891				0.981505	2.22161
2.00038	0.192472				1.99559	-0.103752				0.994003	2.14979
2.02637	0.201846				2.02057	-0.124706				1.0065	2.06591
2.05037	0.185995				2.04556	-0.128599				1.019	2.01371
2.07636	0.172575				2.07054	-0.118433				1.03149	1.92442
2.10035	0.175441				2.09553	-0.112423				1.04399	1.85225
2.12635	0.17635				2.12051	-0.130467				1.05649	1.81343
2.15034	0.163117				2.14549	-0.127533				1.06899	1.72478
2.17633	0.147561				2.17048	-0.111727				1.08148	1.65904
2.20032	0.156636				2.19546	-0.128426				1.09398	1.58588
2.22632	0.157253				2.22045	-0.121673				1.10648	1.5132
2.25031	0.141925				2.24543	-0.131625				1.11898	1.43928
2.27631	0.131571				2.27041	-0.125422				1.13147	1.35749
2.3003	0.129244				2.2954	-0.137936				1.14397	1.31382
2.32629	0.123247				2.32038	-0.136253				1.15647	1.23453
2.35029	0.122214				2.34537	-0.144871				1.16896	1.17532
2.37628	0.118725				2.37035	-0.134547				1.18146	1.10172
2.40028	0.113707				2.39534	-0.116162				1.19396	1.023
2.42627	0.106687				2.42032	-0.12451				1.20646	0.964256
2.45026	0.091872				2.4453	-0.130735				1.21895	0.906614
2.47626	0.094699				2.47029	-0.136343				1.23145	0.844396
2.50025	0.09246				2.49527	-0.124318				1.24395	0.752618
2.52624	0.081772				2.52026	-0.121567				1.25644	0.697452
2.55024	0.079252				2.54524	-0.149256				1.26894	0.64135
2.57623	0.088104				2.57022	-0.139733				1.28144	0.596336
2.60023	0.069977				2.59521	-0.132695				1.29394	0.531666
2.62622	0.078502				2.62019	-0.143948				1.30643	0.463827
2.65021	0.076322				2.64518	-0.148967				1.31893	0.387491
2.6762	0.05879				2.67016	-0.150434				1.33143	0.316811
2.7002	0.061353				2.69514	-0.143108				1.34392	0.266047
2.72619	0.053442				2.72013	-0.148821				1.35642	0.236785
2.75019	0.049804				2.74511	-0.140484				1.36892	0.160909
2.77618	0.058028				2.7701	-0.14459				1.38142	0.096669
2.80017	0.053762				2.79508	-0.140206				1.39391	0.047988
2.82617	0.061943				2.82006	-0.152965				1.40641	-0.020192
2.85016	0.045718				2.84505	-0.147502				1.41891	-0.058701
2.87616	0.060535				2.87003	-0.144477				1.4314	-0.127808
2.90015	0.035273				2.89502	-0.15458				1.4439	-0.158459
2.92614	0.054299				2.92	-0.144173				1.4564	-0.220997
2.95014	0.043163				2.94498	-0.160746				1.4689	-0.28707
2.97613	0.044954				2.96997	-0.15075				1.48139	-0.326306
3.00013	0.056517				2.99495	-0.148831				1.49389	-0.400191
3.02612	0.052685				3.01994	-0.15158				1.50639	-0.40416
3.05011	0.043793				3.04492	-0.159041				1.51889	-0.461318
3.07611	0.044386				3.0699	-0.151024				1.53138	-0.506774
3.1001	0.041964				3.09489	-0.147373				1.54388	-0.546651
3.12609	0.061423				3.11987	-0.155806				1.55638	-0.615511
3.15008	0.059108				3.14486	-0.155211				1.56887	-0.667922
3.17608	0.051361				3.16984	-0.155415				1.58137	-0.708981
3.20007	0.051459				3.19482	-0.153099				1.59387	-0.72021
3.22607	0.06337				3.21981	-0.150376				1.60637	-0.735432
3.25006	0.072416				3.24479	-0.153524				1.61886	-0.798466
3.27605	0.058723				3.26978	-0.140439				1.63136	-0.828538
3.30005	0.074121				3.29476	-0.161398				1.64386	-0.851681
3.32604	0.077862				3.31975	-0.147119				1.65635	-0.91196
3.35004	0.083377				3.34473	-0.15501				1.66885	-0.953316
3.37603	0.091779				3.36971	-0.148373				1.68135	-0.983724
3.40002	0.088241				3.3947	-0.151674				1.69385	-1.03486
3.42602	0.107695				3.41968	-0.142867				1.70634	-1.04003
3.45001	0.102438				3.44467	-0.150116				1.71884	-1.10668
3.47601	0.120973				3.46965	-0.162253				1.73134	-1.14332
3.5	0.120529				3.49463	-0.150479				1.74383	-1.1781
3.52599	0.142308				3.51962	-0.160159				1.75633	-1.2348
3.54998	0.126953				3.5446	-0.154353				1.76883	-1.23914
3.57598	0.14192				3.56959	-0.156724				1.78133	-1.30194
3.59997	0.149723				3.59457	-0.164493				1.79382	-1.33109
3.62596	0.160599				3.61955	-0.154241				1.80632	-1.34665
3.64996	0.168323				3.64454	-0.156353				1.81882	-1.37891
3.67595	0.176534				3.66952	-0.170944				1.83131	-1.40109
3.69995	0.182262				3.69451	-0.158079				1.84381	-1.44322
3.72594	0.179498				3.71949	-0.154654				1.85631	-1.47295
3.74993	0.195263				3.74447	-0.139337				1.86881	-1.52069
3.77593	0.203732				3.76946	-0.162471				1.8813	-1.5249
3.79992	0.200871				3.79444	-0.159259				1.8938	-1.55137
3.82592	0.21248				3.81943	-0.160964				1.9063	-1.59314
3.84991	0.218381				3.84441	-0.148253				1.9188	-1.61761
3.8759	0.229283				3.86939	-0.159148				1.93129	-1.62077
3.8999	0.240291				3.89438	-0.169526				1.94379	-1.65075
3.92589	0.226883				3.91936	-0.156019				1.95629	-1.66113
3.94989	0.249182				3.94435	-0.168193				1.96878	-1.69407
3.97588	0.270714				3.96933	-0.153638				1.98128	-1.73248
3.99987	0.250197				3.99431	-0.153731				1.99378	-1.74736
4.02587	0.273276				4.0193	-0.154974				2.00628	-1.77229
4.04986	0.274598				4.04428	-0.151819				2.01877	-1.79804
4.07585	0.277564				4.06927	-0.166341				2.03127	-1.8163
4.09985	0.28218				4.09425	-0.164789				2.04377	-1.83576
4.12584	0.303075				4.11923	-0.161497				2.05626	-1.84499
4.14983	0.29162				4.14422	-0.163558				2.06876	-1.85773
4.17583	0.29463				4.1692	-0.166674				2.08126	-1.89334
4.19982	0.316824				4.19419	-0.163795				2.09375	-1.9119
4.22581	0.321342				4.21917	-0.1516				2.10625	-1.92776
4.24981	0.329404				4.24415	-0.157902				2.11875	-1.9264
4.2758	0.327056				4.26914	-0.174729				2.13125	-1.94664
4.2998	0.338868				4.29412	-0.169628				2.14374	-1.96297
4.32579	0.31987				4.31911	-0.163523				2.15624	-1.97458
4.34978	0.333232				4.34409	-0.157976				2.16874	-1.97477
4.37578	0.339809				4.36907	-0.156071				2.18124	-1.9773
4.39977	0.342897				4.39406	-0.151848				2.19373	-2.02012
4.42577	0.337845				4.41904	-0.160896				2.20623	-2.00799
4.44976	0.348862				4.44403	-0.162021				2.21873	-2.03507
4.47575	0.345219				4.46901	-0.152856				2.23122	-2.0208
4.49974	0.345684				4.49399	-0.174119				2.24372	-2.04895
4.52574	0.343275				4.51898	-0.162344				2.25622	-2.03885
4.54973	0.349387				4.54396	-0.159972				2.26872	-2.05955
4.57573	0.358979				4.56895	-0.156988				2.28121	-2.05999
4.59972	0.347704				4.59393	-0.161609				2.29371	-2.07044
4.62571	0.362826				4.61892	-0.161372				2.30621	-2.07415
4.64971	0.351262				4.6439	-0.155637				2.31871	-2.08619
4.6757	0.359344				4.66888	-0.147798				2.3312	-2.08556
4.6997	0.35328				4.69387	-0.155852				2.3437	-2.08185
4.72569	0.358463				4.71885	-0.162291				2.3562	-2.10407
4.74968	0.359028				4.74384	-0.16121				2.36869	-2.10487
4.77568	0.359375				4.76882	-0.168426				2.38119	-2.09934
4.79967	0.364452				4.7938	-0.156442				2.39369	-2.12729
4.82566	0.36767				4.81879	-0.166631				2.40618	-2.12559
4.84966	0.365985				4.84377	-0.158713				2.41868	-2.1202
4.87565	0.358273				4.86876	-0.15675				2.43118	-2.13795
4.89965	0.342425				4.89374	-0.1556				2.44368	-2.15104
4.92564	0.345252				4.91872	-0.153828				2.45617	-2.1538
4.94963	0.344211				4.94371	-0.157521				2.46867	-2.14742
4.97562	0.343534				4.96869	-0.161647				2.48117	-2.16096
4.99962	0.350258				4.99368	-0.160314				2.49367	-2.15032
5.02561	0.329944				5.01866	-0.162194				2.50616	-2.15736
5.04961	0.332501				5.04364	-0.155477				2.51866	-2.1706
5.0756	0.321337				5.06863	-0.153534				2.53116	-2.15226
5.09959	0.326996				5.09361	-0.163534				2.54365	-2.17435
5.12559	0.324492				5.1186	-0.164853				2.55615	-2.17962
5.14958	0.321648				5.14358	-0.161978				2.56865	-2.18395
5.17558	0.309525				5.16857	-0.170584				2.58115	-2.17708
5.19957	0.302046				5.19355	-0.164208				2.59364	-2.18308
5.22556	0.308154				5.21853	-0.159245				2.60614	-2.19815
5.24956	0.304352				5.24352	-0.161869				2.61864	-2.18143
5.27555	0.291299				5.2685	-0.156215				2.63113	-2.21081
5.29955	0.288847				5.29349	-0.161261				2.64363	-2.20637
5.32554	0.271924				5.31847	-0.158105				2.65613	-2.20243
5.34953	0.286888				5.34345	-0.155285				2.66863	-2.19015
5.37553	0.268884				5.36844	-0.168721				2.68112	-2.19837
5.39952	0.266428				5.39342	-0.163524				2.69362	-2.20735
5.42551	0.260727				5.41841	-0.155668				2.70612	-2.21005
5.44951	0.253225				5.44339	-0.144347				2.71861	-2.19592
5.4755	0.262575				5.46837	-0.149861				2.73111	-2.20681
5.49949	0.24325				5.49336	-0.14932				2.74361	-2.1947
5.52549	0.233				5.51834	-0.158916				2.75611	-2.20902
5.54948	0.246296				5.54333	-0.165522				2.7686	-2.22127
5.57547	0.235811				5.56831	-0.165178				2.7811	-2.20888
5.59947	0.225393				5.59329	-0.148975				2.7936	-2.22205
5.62546	0.216201				5.61828	-0.172457				2.8061	-2.20269
5.64946	0.210635				5.64326	-0.166462				2.81859	-2.23044
5.67545	0.205246				5.66825	-0.158351				2.83109	-2.22607
5.69944	0.212595				5.69323	-0.141057				2.84359	-2.21593
5.72544	0.183594				5.71821	-0.162684				2.85608	-2.21005
5.74943	0.181093				5.7432	-0.1636				2.86858	-2.20892
5.77543	0.199658				5.76818	-0.162175				2.88108	-2.22302
5.79942	0.185489				5.79317	-0.166581				2.89357	-2.23724
5.82541	0.177406				5.81815	-0.169342				2.90607	-2.23658
5.8494	0.163705				5.84313	-0.157561				2.91857	-2.22151
5.8754	0.166096				5.86812	-0.152403				2.93107	-2.22877
5.89939	0.162943				5.8931	-0.16093				2.94356	-2.22537
5.92539	0.157628				5.91809	-0.158402				2.95606	-2.23412
5.94938	0.149892				5.94307	-0.159584				2.96856	-2.24855
5.97537	0.135812				5.96805	-0.157893				2.98106	-2.24573
5.99937	0.126407				5.99304	-0.162435				2.99355	-2.23078
6.02536	0.13429				6.01802	-0.16249				3.00605	-2.24318
6.04936	0.131976				6.04301	-0.172704				3.01855	-2.25924
6.07535	0.133557				6.06799	-0.157003				3.03104	-2.25615
6.09934	0.127378				6.09298	-0.15973				3.04354	-2.26422
6.12534	0.128882				6.11796	-0.166364				3.05604	-2.26355
6.14933	0.130331				6.14294	-0.160607				3.06854	-2.28081
6.17532	0.121924				6.16793	-0.162416				3.08103	-2.27801
6.19932	0.106885				6.19291	-0.158014				3.09353	-2.26665
6.22531	0.11898				6.2179	-0.15052				3.10603	-2.27404
6.24931	0.119351				6.24288	-0.158992				3.11852	-2.2784
6.2753	0.112672				6.26786	-0.16202				3.13102	-2.28821
6.29929	0.118009				6.29285	-0.173261				3.14352	-2.30066
6.32529	0.107367				6.31783	-0.164816				3.15602	-2.30575
6.34928	0.099973				6.34281	-0.16252				3.16851	-2.3015
6.37527	0.107162				6.3678	-0.163606				3.18101	-2.27728
6.39926	0.100999				6.39278	-0.174378				3.19351	-2.29222
6.42526	0.108425				6.41777	-0.165026				3.20601	-2.28456
6.44925	0.105163				6.44275	-0.165339				3.2185	-2.30659
6.47525	0.119476				6.46774	-0.159273				3.231	-2.2979
6.49924	0.113576				6.49272	-0.156018				3.2435	-2.29487
6.52523	0.125183				6.5177	-0.16007				3.25599	-2.30807
6.54923	0.122065				6.54269	-0.157504				3.26849	-2.30321
6.57522	0.112458				6.56767	-0.166081				3.28099	-2.31703
6.59922	0.108165				6.59266	-0.16222				3.29348	-2.31341
6.62521	0.107963				6.61764	-0.162432				3.30598	-2.31041
6.6492	0.132237				6.64262	-0.154375				3.31848	-2.32119
6.6752	0.11518				6.66761	-0.16296				3.33098	-2.33696
6.69919	0.128344				6.69259	-0.162987				3.34347	-2.32766
6.72518	0.134182				6.71758	-0.176575				3.35597	-2.32978
6.74918	0.127201				6.74256	-0.158021				3.36847	-2.33983
6.77517	0.142375				6.76755	-0.16869				3.38097	-2.3321
6.79916	0.13272				6.79253	-0.157833				3.39346	-2.34918
6.82516	0.149458				6.81751	-0.164103				3.40596	-2.31956
6.84915	0.157294				6.8425	-0.152668				3.41846	-2.33819
6.87514	0.168074				6.86748	-0.163509				3.43095	-2.34787
6.89914	0.187013				6.89246	-0.168808				3.44345	-2.34897
6.92513	0.162729				6.91745	-0.156864				3.45595	-2.32656
6.94913	0.192899				6.94243	-0.157311				3.46845	-2.351
6.97512	0.189718				6.96742	-0.166311				3.48094	-2.35792
6.99911	0.191271				6.9924	-0.160305				3.49344	-2.34796
7.02511	0.183595				7.01738	-0.153897				3.50594	-2.35762
7.0491	0.199937				7.04237	-0.159922				3.51844	-2.36243
7.0751	0.225518				7.06735	-0.165635				3.53093	-2.35594
7.09909	0.280439				7.09234	-0.107581				3.54343	-2.35284
7.12508	0.344031				7.11732	-0.01432				3.55593	-2.36956
7.14908	0.326006				7.14231	-0.049183				3.56842	-2.36781
7.17507	0.303167				7.16729	-0.090556				3.58092	-2.38141
7.19907	0.306709				7.19227	-0.079332				3.59342	-2.3692
7.22506	0.291035				7.21726	-0.099927				3.60591	-2.37582
7.24905	0.292942				7.24224	-0.114179				3.61841	-2.3826
7.27504	0.280597				7.26723	-0.121398				3.63091	-2.37242
7.29904	0.30865				7.29221	-0.11727				3.64341	-2.38476
7.32503	0.316721				7.31719	-0.135077				3.6559	-2.37382
7.34903	0.306435				7.34218	-0.135634				3.6684	-2.39122
7.37502	0.318458				7.36716	-0.125751				3.6809	-2.38221
7.39901	0.323171				7.39215	-0.147892				3.6934	-2.39257
7.42501	0.335509				7.41713	-0.131866				3.70589	-2.38328
7.449	0.330849				7.44211	-0.131576				3.71839	-2.39552
7.47499	0.348595				7.4671	-0.145263				3.73089	-2.39112
7.49899	0.34423				7.49208	-0.139287				3.74338	-2.42932
7.52498	0.349848				7.51707	-0.13241				3.75588	-2.40298
7.54898	0.352574				7.54205	-0.151724				3.76838	-2.40624
7.57497	0.365056				7.56703	-0.143559				3.78087	-2.42967
7.59896	0.365901				7.59202	-0.14506				3.79337	-2.41263
7.62496	0.374261				7.617	-0.147521				3.80587	-2.41627
7.64895	0.374149				7.64199	-0.152377				3.81837	-2.43428
7.67495	0.367838				7.66697	-0.145715				3.83086	-2.43623
7.69894	0.369078				7.69196	-0.147698				3.84336	-2.42808
7.72493	0.382728				7.71694	-0.15836				3.85586	-2.42799
7.74892	0.392598				7.74192	-0.152444				3.86836	-2.44167
7.77492	0.395297				7.76691	-0.156453				3.88085	-2.43494
7.79891	0.391414				7.79189	-0.148685				3.89335	-2.46292
7.82491	0.383114				7.81687	-0.152992				3.90585	-2.46752
7.8489	0.379636				7.84186	-0.144825				3.91834	-2.46346
7.87489	0.393634				7.86684	-0.151566				3.93084	-2.45788
7.89889	0.408652				7.89183	-0.151282				3.94334	-2.47082
7.92488	0.399401				7.91681	-0.153789				3.95584	-2.46736
7.94888	0.393075				7.94179	-0.156436				3.96833	-2.47359
7.97487	0.402449				7.96678	-0.145012				3.98083	-2.47218
7.99886	0.394499				7.99176	-0.162445				3.99333	-2.4658
8.02486	0.399887				8.01675	-0.161317				4.00582	-2.47746
8.04885	0.407458				8.04173	-0.156281				4.01832	-2.4711
8.07484	0.407076				8.06672	-0.155094				4.03082	-2.47137
8.09884	0.401486				8.0917	-0.169779				4.04332	-2.49885
8.12483	0.404016				8.11668	-0.157095				4.05581	-2.51086
8.14882	0.392384				8.14167	-0.159976				4.06831	-2.49506
8.17482	0.398473				8.16665	-0.151582				4.08081	-2.50657
8.19881	0.40052				8.19164	-0.143703				4.0933	-2.50724
8.2248	0.402085				8.21662	-0.158996				4.1058	-2.51548
8.2488	0.39739				8.2416	-0.156177				4.1183	-2.50834
8.27479	0.417041				8.26659	-0.145058				4.1308	-2.52674
8.29879	0.408141				8.29157	-0.141032				4.14329	-2.52891
8.32478	0.414117				8.31656	-0.156566				4.15579	-2.53831
8.34877	0.407633				8.34154	-0.163894				4.16829	-2.5357
8.37477	0.392896				8.36652	-0.154652				4.18079	-2.53934
8.39876	0.402477				8.39151	-0.163856				4.19328	-2.54459
8.42475	0.40578				8.41649	-0.152938				4.20578	-2.53492
8.44875	0.397212				8.44148	-0.16729				4.21828	-2.56463
8.47474	0.390574				8.46646	-0.153845				4.23077	-2.55136
8.49874	0.396365				8.49145	-0.168356				4.24327	-2.57638
8.52473	0.368476				8.51643	-0.152373				4.25577	-2.5745
8.54872	0.381793				8.54141	-0.153406				4.26827	-2.59747
8.57472	0.375778				8.5664	-0.157188				4.28076	-2.59369
8.59871	0.38389				8.59138	-0.15899				4.29326	-2.5964
8.62471	0.371891				8.61637	-0.167975				4.30576	-2.60856
8.6487	0.360861				8.64135	-0.163853				4.31825	-2.60607
8.67469	0.360386				8.66633	-0.154856				4.33075	-2.62121
8.69868	0.355931				8.69132	-0.158671				4.34325	-2.61843
8.72468	0.34324				8.7163	-0.160213				4.35575	-2.63007
8.74867	0.34327				8.74128	-0.169391				4.36824	-2.62928
8.77467	0.3353				8.76627	-0.155101				4.38074	-2.63164
8.79866	0.34268				8.79125	-0.150218				4.39324	-2.65378
8.82465	0.32893				8.81624	-0.161505				4.40573	-2.65093
8.84865	0.311962				8.84122	-0.156951				4.41823	-2.643
8.87464	0.312359				8.86621	-0.159228				4.43073	-2.6613
8.89864	0.311098				8.89119	-0.146913				4.44323	-2.68213
8.92463	0.30184				8.91617	-0.167854				4.45572	-2.70279
8.94862	0.29336				8.94116	-0.163871				4.46822	-2.68784
8.97462	0.28474				8.96614	-0.156427				4.48072	-2.69458
8.99861	0.287403				8.99113	-0.148284				4.49322	-2.70455
9.0246	0.299877				9.01611	-0.139626				4.50571	-2.71087
9.0486	0.290865				9.0411	-0.153431				4.51821	-2.69367
9.07459	0.292917				9.06608	-0.149128				4.53071	-2.72053
9.09858	0.281343				9.09106	-0.155831				4.5432	-2.71635
9.12458	0.284313				9.11605	-0.134442				4.5557	-2.72124
9.14857	0.286878				9.14103	-0.151342				4.5682	-2.7368
9.17456	0.28981				9.16601	-0.161412				4.5807	-2.73737
9.19856	0.290949				9.191	-0.150286				4.59319	-2.7521
9.22455	0.336265				9.21598	-0.146397				4.60569	-2.75282
9.24855	0.401012				9.24097	-0.145125				4.61819	-2.76682
9.27454	0.65392				9.26595	-0.149145				4.63068	-2.76603
9.29853	1.51704				9.29093	-0.141362				4.64318	-2.76476
9.32453	5.47098				9.31592	-0.138578				4.65568	-2.78906
9.34852	14.5158				9.3409	-0.140052				4.66818	-2.81252
9.37452	29.1559				9.36589	-0.133179				4.68067	-2.79244
9.39851	45.4837				9.39087	-0.146024				4.69317	-2.81384
9.4245	64.3083				9.41586	-0.14819				4.70567	-2.81704
9.4485	82.0032				9.44084	-0.134398				4.71816	-2.82654
9.47449	99.6921				9.46582	-0.136057				4.73066	-2.83267
9.49849	113.541				9.49081	-0.137923				4.74316	-2.83404
9.52448	125.214				9.51579	-0.124663				4.75566	-2.86141
9.54847	132.753				9.54078	-0.127453				4.76815	-2.85159
9.57446	137.803				9.56576	-0.118852				4.78065	-2.85895
9.59846	139.87	dimer			9.59074	-0.130921				4.79315	-2.88518
9.62445	139.832				9.61573	-0.133598				4.80565	-2.86919
9.64845	138.1				9.64071	-0.120497				4.81814	-2.8949
9.67444	134.763				9.6657	-0.114231				4.83064	-2.90623
9.69843	130.627				9.69068	-0.124172				4.84314	-2.90747
9.72443	125.385				9.71566	-0.120752				4.85563	-2.92678
9.74842	120.208				9.74065	-0.123838				4.86813	-2.92088
9.77441	114.409				9.76563	-0.111693				4.88063	-2.93555
9.79841	109.03				9.79062	-0.119723				4.89313	-2.94244
9.8244	103.335				9.8156	-0.10668				4.90562	-2.95585
9.8484	98.4273				9.84058	-0.119606				4.91812	-2.95774
9.87439	93.5297				9.86557	-0.103883				4.93062	-2.96631
9.89838	89.4151				9.89055	-0.090511				4.94311	-2.96601
9.92438	85.4279				9.91554	-0.112166				4.95561	-2.996
9.94837	82.3265				9.94052	-0.096956				4.96811	-3.00301
9.97437	79.5287				9.96551	-0.09406				4.9806	-3.00685
9.99836	77.4632				9.99049	-0.104718				4.9931	-3.01349
10.0243	75.7106				10.0155	-0.085659				5.0056	-3.02412
10.0483	74.544				10.0405	-0.094222				5.0181	-3.03733
10.0743	73.7024				10.0654	-0.077965				5.03059	-3.04483
10.0983	73.1796				10.0904	-0.071354				5.04309	-3.06163
10.1243	72.7547				10.1154	-0.072459				5.05559	-3.05977
10.1483	72.3973				10.1404	-0.07997				5.06809	-3.06824
10.1743	71.9791				10.1654	-0.061386				5.08058	-3.06764
10.1983	71.4647				10.1904	-0.055258				5.09308	-3.09272
10.2243	70.772				10.2153	-0.046815				5.10558	-3.09751
10.2483	69.952				10.2403	-0.033987				5.11807	-3.08487
10.2743	68.9108				10.2653	-0.032928				5.13057	-3.10661
10.2983	67.8209				10.2903	-0.001237				5.14307	-3.11732
10.3243	66.5118				10.3153	0.018908				5.15557	-3.12172
10.3483	65.2203				10.3403	0.038889				5.16806	-3.14182
10.3743	63.7762				10.3652	0.059805				5.18056	-3.13876
10.3983	62.3749				10.3902	0.085971				5.19306	-3.15522
10.4243	60.8415				10.4152	0.13443				5.20555	-3.16764
10.4482	59.4429				10.4402	0.158364				5.21805	-3.16749
10.4742	57.8753				10.4652	0.214567				5.23055	-3.18916
10.4982	56.5085				10.4902	0.258842				5.24305	-3.18602
10.5242	55.0254				10.5152	0.322774				5.25554	-3.17099
10.5482	53.7288				10.5401	0.386735				5.26804	-3.18664
10.5742	52.385				10.5651	0.487168				5.28054	-3.21662
10.5982	51.2571				10.5901	0.681525				5.29303	-3.22934
10.6242	50.2199				10.6151	0.950036				5.30553	-3.24419
10.6482	49.4107				10.6401	1.44623				5.31803	-3.24368
10.6742	48.8417				10.6651	2.36511				5.33053	-3.25485
10.6982	48.6326				10.69	3.90209				5.34302	-3.27948
10.7242	48.7433				10.715	6.44236				5.35552	-3.26839
10.7482	49.1793				10.74	10.4351				5.36802	-3.27926
10.7742	49.9895				10.765	16.2098				5.38051	-3.29444
10.7982	50.9861				10.79	24.0626				5.39301	-3.31459
10.8241	52.2522				10.815	33.8269				5.40551	-3.32449
10.8481	53.5081				10.8399	45.3113				5.41801	-3.32997
10.8741	54.8225				10.8649	57.8457				5.4305	-3.34415
10.8981	55.9721				10.8899	70.7248				5.443	-3.34741
10.9241	56.9532				10.9149	83.1809				5.4555	-3.3774
10.9481	57.6319				10.9399	94.9459				5.468	-3.38537
10.9741	58.0076				10.9649	105.356				5.48049	-3.38791
10.9981	57.9934				10.9899	114.29				5.49299	-3.39945
11.0241	57.6196				11.0148	121.521				5.50549	-3.39486
11.0481	56.931				11.0398	127.242				5.51798	-3.40894
11.0741	55.8262				11.0648	131.273				5.53048	-3.41681
11.0981	54.5275				11.0898	133.867				5.54298	-3.4134
11.1241	52.8351				11.1148	135.123				5.55548	-3.42599
11.1481	51.0968				11.1398	135.166				5.56797	-3.45222
11.1741	49.0365				11.1647	134.08				5.58047	-3.45975
11.1981	47.0503				11.1897	132.047				5.59297	-3.47214
11.224	44.8292				11.2147	129.187				5.60546	-3.46805
11.248	42.803				11.2397	125.723				5.61796	-3.48944
11.274	40.631				11.2647	121.677				5.63046	-3.48454
11.298	38.7218				11.2897	117.225				5.64296	-3.50356
11.324	36.7237				11.3146	112.469				5.65545	-3.50849
11.348	34.9959				11.3396	107.624				5.66795	-3.51798
11.374	33.2704				11.3646	102.687				5.68045	-3.53407
11.398	31.7501				11.3896	97.816				5.69294	-3.54213
11.424	30.2536				11.4146	93.0175				5.70544	-3.56714
11.448	28.9736				11.4396	88.4921				5.71794	-3.55497
11.474	27.724				11.4645	84.2149				5.73044	-3.58246
11.498	26.6272				11.4895	80.1888				5.74293	-3.59723
11.524	25.5457				11.5145	76.5024				5.75543	-3.60415
11.548	24.6124				11.5395	73.1156				5.76793	-3.60333
11.574	23.663				11.5645	70.0595				5.78043	-3.60853
11.598	22.8338				11.5895	67.2651				5.79292	-3.60666
11.6239	22.002				11.6145	64.7369				5.80542	-3.62824
11.6479	21.2608				11.6394	62.4396				5.81792	-3.65167
11.6739	20.4993				11.6644	60.3303				5.83041	-3.64006
11.6979	19.8338				11.6894	58.3344				5.84291	-3.67094
11.7239	19.1653				11.7144	56.5104				5.85541	-3.65827
11.7479	18.5301				11.7394	54.747				5.86791	-3.68286
11.7739	17.9214				11.7644	53.0706				5.8804	-3.69307
11.7979	17.3619				11.7893	51.438				5.8929	-3.6997
11.8239	16.7881				11.8143	49.8458				5.9054	-3.70922
11.8479	16.2627				11.8393	48.285				5.91789	-3.72747
11.8739	15.7359				11.8643	46.7326				5.93039	-3.72569
11.8979	15.2671				11.8893	45.2151				5.94289	-3.73523
11.9239	14.76				11.9143	43.6881				5.95539	-3.74298
11.9479	14.3182				11.9392	42.2138				5.96788	-3.7467
11.9739	13.8571				11.9642	40.7334				5.98038	-3.76977
11.9979	13.4559				11.9892	39.2899				5.99288	-3.77027
12.0238	13.036				12.0142	37.8531				6.00537	-3.77573
12.0478	12.6587				12.0392	36.4327				6.01787	-3.78122
12.0738	12.2687				12.0642	35.0489				6.03037	-3.78111
12.0978	11.9226				12.0891	33.6929				6.04287	-3.812
12.1238	11.5668				12.1141	32.3609				6.05536	-3.82574
12.1478	11.278				12.1391	31.0495				6.06786	-3.82197
12.1738	10.9524				12.1641	29.7652				6.08036	-3.84094
12.1978	10.6577				12.1891	28.5305				6.09286	-3.839
12.2238	10.3833				12.2141	27.3327				6.10535	-3.84725
12.2478	10.1361				12.2391	26.1545				6.11785	-3.85232
12.2738	9.85833				12.264	25.0307				6.13035	-3.88383
12.2978	9.62402				12.289	23.9415				6.14284	-3.87963
12.3238	9.38787				12.314	22.9054				6.15534	-3.86367
12.3478	9.18723				12.339	21.8933				6.16784	-3.90737
12.3738	8.97754				12.364	20.9249				6.18034	-3.9156
12.3978	8.79253				12.389	20.0012				6.19283	-3.91802
12.4237	8.59952				12.4139	19.1234				6.20533	-3.9191
12.4477	8.42075				12.4389	18.2611				6.21783	-3.92585
12.4737	8.24127				12.4639	17.4383				6.23032	-3.91573
12.4977	8.09717				12.4889	16.6622				6.24282	-3.93136
12.5237	7.93343				12.5139	15.9245				6.25532	-3.9457
12.5477	7.79884				12.5389	15.1985				6.26782	-3.95625
12.5737	7.61858				12.5638	14.5176				6.28031	-3.97155
12.5977	7.49049				12.5888	13.8684				6.29281	-3.96934
12.6237	7.36001				12.6138	13.2354				6.30531	-3.99919
12.6477	7.23563				12.6388	12.6537				6.3178	-4.01641
12.6737	7.11244				12.6638	12.0802				6.3303	-3.99668
12.6977	7.00238				12.6888	11.5409				6.3428	-4.00831
12.7237	6.88312				12.7138	11.0372				6.3553	-4.00616
12.7477	6.79098				12.7387	10.5543				6.36779	-4.02818
12.7737	6.6685				12.7637	10.0847				6.38029	-4.03666
12.7976	6.56795				12.7887	9.65758				6.39279	-4.04051
12.8236	6.45458				12.8137	9.2403				6.40529	-4.04286
12.8476	6.35611				12.8387	8.85421				6.41778	-4.06411
12.8736	6.26432				12.8637	8.47812				6.43028	-4.06994
12.8976	6.17847				12.8886	8.12919				6.44278	-4.08191
12.9236	6.09407				12.9136	7.77736				6.45527	-4.06733
12.9476	6.00317				12.9386	7.487				6.46777	-4.09322
12.9736	5.9344				12.9636	7.16771				6.48027	-4.12321
12.9976	5.86591				12.9886	6.90191				6.49277	-4.11716
13.0236	5.7634				13.0136	6.64103				6.50526	-4.11142
13.0476	5.70576				13.0385	6.37801				6.51776	-4.12059
13.0736	5.62887				13.0635	6.11989				6.53026	-4.14121
13.0976	5.55543				13.0885	5.89839				6.54275	-4.15026
13.1236	5.48353				13.1135	5.68599				6.55525	-4.13855
13.1476	5.42172				13.1385	5.49052				6.56775	-4.17517
13.1736	5.36572				13.1635	5.29619				6.58024	-4.17034
13.1975	5.29092				13.1884	5.10204				6.59274	-4.16758
13.2235	5.22398				13.2134	4.91235				6.60524	-4.18395
13.2475	5.15222				13.2384	4.75425				6.61774	-4.19265
13.2735	5.1125				13.2634	4.60759				6.63023	-4.21822
13.2975	5.04004				13.2884	4.43402				6.64273	-4.2111
13.3235	4.98674				13.3134	4.29918				6.65523	-4.21205
13.3475	4.93036				13.3384	4.15044				6.66773	-4.25548
13.3735	4.89256				13.3633	4.02484				6.68022	-4.24594
13.3975	4.83067				13.3883	3.88676				6.69272	-4.25995
13.4235	4.76177				13.4133	3.77474				6.70522	-4.24094
13.4475	4.7093				13.4383	3.65751				6.71771	-4.25769
13.4735	4.67105				13.4633	3.57482				6.73021	-4.26822
13.4975	4.62012				13.4883	3.44759				6.74271	-4.2848
13.5235	4.56045				13.5132	3.35373				6.75521	-4.28782
13.5475	4.53305				13.5382	3.25742				6.7677	-4.29313
13.5735	4.46486				13.5632	3.1457				6.7802	-4.29418
13.5975	4.43094				13.5882	3.0793				6.7927	-4.30235
13.6234	4.38904				13.6132	2.99762				6.8052	-4.32572
13.6474	4.3533				13.6382	2.90565				6.81769	-4.32714
13.6734	4.33162				13.6631	2.83705				6.83019	-4.33051
13.6974	4.28637				13.6881	2.76032				6.84269	-4.33059
13.7234	4.26055				13.7131	2.6911				6.85518	-4.35243
13.7474	4.21619				13.7381	2.62309				6.86768	-4.34414
13.7734	4.18549				13.7631	2.56406				6.88018	-4.35182
13.7974	4.16367				13.7881	2.509				6.89267	-4.361
13.8234	4.12506				13.813	2.45338				6.90517	-4.3733
13.8474	4.09743				13.838	2.39162				6.91767	-4.37613
13.8734	4.08129				13.863	2.33984				6.93017	-4.37817
13.8974	4.04906				13.888	2.29299				6.94266	-4.38167
13.9234	4.01943				13.913	2.23242				6.95516	-4.40212
13.9474	4.001				13.938	2.1945				6.96766	-4.408
13.9734	3.98388				13.963	2.14325				6.98015	-4.41388
13.9973	3.94925				13.9879	2.10951				6.99265	-4.39852
14.0233	3.92869				14.0129	2.05432				7.00515	-4.43319
14.0473	3.91257				14.0379	2.02602				7.01765	-4.41468
14.0733	3.87201				14.0629	1.98432				7.03014	-4.44373
14.0973	3.85262				14.0879	1.93955				7.04264	-4.45469
14.1233	3.82643				14.1129	1.90253				7.05514	-4.44494
14.1473	3.82155				14.1378	1.86327				7.06764	-4.43627
14.1733	3.77337				14.1628	1.83919				7.08013	-4.45907
14.1973	3.75349				14.1878	1.80538				7.09263	-4.47787
14.2233	3.74185				14.2128	1.77				7.10513	-4.46438
14.2473	3.73648				14.2378	1.73137				7.11762	-4.48646
14.2733	3.70276				14.2628	1.7047				7.13012	-4.48746
14.2973	3.6784				14.2877	1.67834				7.14262	-4.49133
14.3233	3.66792				14.3127	1.64598				7.15512	-4.50411
14.3473	3.64162				14.3377	1.61642				7.16761	-4.50897
14.3732	3.62847				14.3627	1.58269				7.18011	-4.52147
14.3972	3.5988				14.3877	1.56617				7.19261	-4.51666
14.4232	3.58726				14.4127	1.54161				7.2051	-4.53673
14.4472	3.56809				14.4377	1.51781				7.2176	-4.52324
14.4732	3.55673				14.4626	1.50433				7.2301	-4.53578
14.4972	3.53452				14.4876	1.48562				7.2426	-4.54308
14.5232	3.51544				14.5126	1.44557				7.25509	-4.56058
14.5472	3.5037				14.5376	1.43659				7.26759	-4.55297
14.5732	3.47725				14.5626	1.40919				7.28009	-4.57624
14.5972	3.46425				14.5876	1.39167				7.29258	-4.57661
14.6232	3.44794				14.6125	1.37113				7.30508	-4.5981
14.6472	3.42618				14.6375	1.34218				7.31758	-4.59412
14.6732	3.40886				14.6625	1.33634				7.33008	-4.60147
14.6972	3.38146				14.6875	1.32372				7.34257	-4.60486
14.7232	3.37129				14.7125	1.29451				7.35507	-4.61275
14.7472	3.33634				14.7375	1.26318				7.36757	-4.60824
14.7732	3.33168				14.7624	1.27437				7.38007	-4.62746
14.7971	3.31771				14.7874	1.24243				7.39256	-4.65051
14.8231	3.27843				14.8124	1.22898				7.40506	-4.65613
14.8471	3.28174				14.8374	1.22515				7.41756	-4.65295
14.8731	3.2563				14.8624	1.21509				7.43005	-4.65544
14.8971	3.23365				14.8874	1.17317				7.44255	-4.65397
14.9231	3.22438				14.9123	1.16954				7.45505	-4.66142
14.9471	3.19847				14.9373	1.16175				7.46755	-4.67581
14.9731	3.18968				14.9623	1.13711				7.48004	-4.66716
14.9971	3.17047				14.9873	1.13526				7.49254	-4.6718
15.0231	3.16246				15.0123	1.12171				7.50504	-4.70581
15.0471	3.13694				15.0373	1.10199				7.51753	-4.7017
15.0731	3.10651				15.0623	1.10284				7.53003	-4.69422
15.0971	3.09668				15.0872	1.088				7.54253	-4.69807
15.1231	3.06344				15.1122	1.06064				7.55503	-4.72834
15.1471	3.05082				15.1372	1.06193				7.56752	-4.7204
15.1731	3.03085				15.1622	1.04445				7.58002	-4.73371
15.197	3.00938				15.1872	1.02321				7.59252	-4.7475
15.223	2.98359				15.2122	1.03223				7.60501	-4.73838
15.247	2.96202				15.2371	1.02086				7.61751	-4.72848
15.273	2.94446				15.2621	1.00016				7.63001	-4.75398
15.297	2.93146				15.2871	0.987267				7.64251	-4.77465
15.323	2.90574				15.3121	0.962397				7.655	-4.76928
15.347	2.88631				15.3371	0.959494				7.6675	-4.7856
15.373	2.87568				15.3621	0.944648				7.68	-4.78709
15.397	2.84061				15.387	0.936785				7.6925	-4.81695
15.423	2.82765				15.412	0.923606				7.70499	-4.8005
15.447	2.8006				15.437	0.912022				7.71749	-4.78798
15.473	2.78004				15.462	0.899826				7.72999	-4.81432
15.497	2.75961				15.487	0.896345				7.74248	-4.80803
15.523	2.73189				15.512	0.89135				7.75498	-4.80618
15.547	2.72839				15.5369	0.867435				7.76748	-4.81395
15.5729	2.7047				15.5619	0.864791				7.77998	-4.82486
15.5969	2.69331				15.5869	0.851382				7.79247	-4.81008
15.6229	2.6688				15.6119	0.840289				7.80497	-4.82731
15.6469	2.66091				15.6369	0.834217				7.81747	-4.84654
15.6729	2.6272				15.6619	0.82323				7.82996	-4.83458
15.6969	2.6156				15.6869	0.821009				7.84246	-4.85184
15.7229	2.59265				15.7118	0.793397				7.85496	-4.83106
15.7469	2.59204				15.7368	0.793095				7.86745	-4.85042
15.7729	2.56635				15.7618	0.788465				7.87995	-4.85343
15.7969	2.54733				15.7868	0.771469				7.89245	-4.8507
15.8229	2.53617				15.8118	0.790841				7.90495	-4.84373
15.8469	2.5181				15.8368	0.765281				7.91744	-4.85033
15.8729	2.49407				15.8617	0.774231				7.92994	-4.84622
15.8969	2.46874				15.8867	0.755719				7.94244	-4.86239
15.9229	2.45794				15.9117	0.731943				7.95494	-4.86495
15.9469	2.44835				15.9367	0.73401				7.96743	-4.85361
15.9729	2.43413				15.9617	0.72961				7.97993	-4.85139
15.9968	2.417				15.9867	0.724418				7.99243	-4.87933
16.0228	2.39985				16.0116	0.709281				8.00493	-4.87744
16.0468	2.38178				16.0366	0.696402				8.01742	-4.8742
16.0728	2.36093				16.0616	0.688099				8.02992	-4.86409
16.0968	2.36454				16.0866	0.687991				8.04242	-4.85648
16.1228	2.32984				16.1116	0.674898				8.05491	-4.88203
16.1468	2.30882				16.1366	0.675106				8.06741	-4.87867
16.1728	2.2921				16.1616	0.655907				8.07991	-4.88053
16.1968	2.28717				16.1865	0.670102				8.0924	-4.89046
16.2228	2.28265				16.2115	0.656543				8.1049	-4.89528
16.2468	2.26286				16.2365	0.658046				8.1174	-4.88932
16.2728	2.26065				16.2615	0.641041				8.1299	-4.90353
16.2968	2.25173				16.2865	0.630501				8.14239	-4.88996
16.3228	2.23295				16.3115	0.612793				8.15489	-4.90174
16.3468	2.21536				16.3364	0.613069				8.16739	-4.88518
16.3727	2.20668				16.3614	0.601137				8.17989	-4.91959
16.3967	2.19599				16.3864	0.603992				8.19238	-4.90791
16.4227	2.19321				16.4114	0.609839				8.20488	-4.89387
16.4467	2.17323				16.4364	0.592037				8.21738	-4.91154
16.4727	2.17495				16.4614	0.582912				8.22987	-4.91479
16.4967	2.17632				16.4863	0.587273				8.24237	-4.91631
16.5227	2.15215				16.5113	0.579572				8.25487	-4.91009
16.5467	2.15239				16.5363	0.5555				8.26736	-4.91538
16.5727	2.14523				16.5613	0.563297				8.27986	-4.92159
16.5967	2.15322				16.5863	0.547226				8.29236	-4.92485
16.6227	2.14194				16.6113	0.544534				8.30486	-4.9307
16.6467	2.13914				16.6362	0.552207				8.31735	-4.92835
16.6727	2.13527				16.6612	0.535789				8.32985	-4.94751
16.6967	2.14591				16.6862	0.53305				8.34235	-4.942
16.7227	2.13752				16.7112	0.529954				8.35485	-4.93306
16.7467	2.13791				16.7362	0.526955				8.36734	-4.94942
16.7726	2.13626				16.7612	0.517272				8.37984	-4.95718
16.7966	2.15796				16.7862	0.505664				8.39234	-4.95896
16.8226	2.15363				16.8111	0.516784				8.40484	-4.96509
16.8466	2.14747				16.8361	0.489778				8.41733	-4.96763
16.8726	2.16588				16.8611	0.50117				8.42983	-4.96811
16.8966	2.17065				16.8861	0.485193				8.44233	-4.95087
16.9226	2.19294				16.9111	0.476725				8.45482	-4.96776
16.9466	2.1991				16.9361	0.46622				8.46732	-4.98664
16.9726	2.20222				16.961	0.477096				8.47982	-4.9922
16.9966	2.22793				16.986	0.465079				8.49231	-4.97366
17.0226	2.23008				17.011	0.463355				8.50481	-5.00502
17.0466	2.25151				17.036	0.451426				8.51731	-5.00059
17.0726	2.25628				17.061	0.461041				8.52981	-5.00423
17.0966	2.27907				17.086	0.450252				8.5423	-5.00982
17.1226	2.30125				17.1109	0.452792				8.5548	-5.01509
17.1465	2.32099				17.1359	0.438273				8.5673	-5.03334
17.1725	2.35724				17.1609	0.440468				8.5798	-5.03615
17.1965	2.36464				17.1859	0.428411				8.59229	-5.03154
17.2225	2.38706				17.2109	0.421153				8.60479	-5.04225
17.2465	2.42042				17.2359	0.425571				8.61729	-5.06407
17.2725	2.44748				17.2608	0.409774				8.62979	-5.06551
17.2965	2.46129				17.2858	0.40841				8.64228	-5.08492
17.3225	2.48464				17.3108	0.419806				8.65478	-5.06219
17.3465	2.51095				17.3358	0.404767				8.66728	-5.08064
17.3725	2.5299				17.3608	0.396163				8.67977	-5.08645
17.3965	2.57181				17.3858	0.38722				8.69227	-5.07143
17.4225	2.57725				17.4108	0.386884				8.70477	-5.09534
17.4465	2.59604				17.4357	0.392957				8.71726	-5.11272
17.4725	2.62061				17.4607	0.382052				8.72976	-5.10984
17.4965	2.63086				17.4857	0.378345				8.74226	-5.10891
17.5225	2.6555				17.5107	0.376107				8.75476	-5.11609
17.5465	2.67891				17.5357	0.367692				8.76725	-5.1229
17.5724	2.68013				17.5607	0.371627				8.77975	-5.13232
17.5964	2.69941				17.5856	0.362474				8.79225	-5.1344
17.6224	2.70289				17.6106	0.368261				8.80475	-5.14656
17.6464	2.72302				17.6356	0.353317				8.81724	-5.13889
17.6724	2.71926				17.6606	0.361068				8.82974	-5.16246
17.6964	2.71908				17.6856	0.372773				8.84224	-5.16323
17.7224	2.72875				17.7106	0.363275				8.85473	-5.15284
17.7464	2.72256				17.7355	0.362999				8.86723	-5.14489
17.7724	2.73375				17.7605	0.379813				8.87973	-5.16762
17.7964	2.71868				17.7855	0.368138				8.89222	-5.17935
17.8224	2.71193				17.8105	0.378857				8.90472	-5.16163
17.8464	2.71256				17.8355	0.380029				8.91722	-5.17522
17.8724	2.70305				17.8605	0.362257				8.92972	-5.17646
17.8964	2.67922				17.8854	0.381477				8.94221	-5.18104
17.9224	2.67963				17.9104	0.382979				8.95471	-5.19531
17.9464	2.66423				17.9354	0.362892				8.96721	-5.19586
17.9723	2.66646				17.9604	0.357052				8.97971	-5.20245
17.9963	2.64378				17.9854	0.371029				8.9922	-5.20768
18.0223	2.6289				18.0104	0.373967				9.0047	-5.20667
18.0463	2.61816				18.0354	0.357529				9.0172	-5.22253
18.0723	2.60545				18.0603	0.358839				9.0297	-5.20362
18.0963	2.61361				18.0853	0.348775				9.04219	-5.20931
18.1223	2.61438				18.1103	0.347309				9.05469	-5.19803
18.1463	2.59687				18.1353	0.350537				9.06719	-5.14226
18.1723	2.60398				18.1603	0.342987				9.07968	-5.01008
18.1963	2.60479				18.1853	0.343209				9.09218	-4.88233
18.2223	2.61985				18.2102	0.342438				9.10468	-4.87904
18.2463	2.63941				18.2352	0.332713				9.11717	-4.89582
18.2723	2.68273				18.2602	0.327547				9.12967	-4.93287
18.2963	2.70881				18.2852	0.326179				9.14217	-4.99469
18.3223	2.75045				18.3102	0.322497				9.15467	-5.02845
18.3462	2.81017				18.3352	0.324036				9.16716	-5.0536
18.3722	2.88576				18.3601	0.330246				9.17966	-5.08349
18.3962	2.94004				18.3851	0.349146				9.19216	-5.08872
18.4222	3.01757				18.4101	0.33273				9.20466	-5.12568
18.4462	3.10062				18.4351	0.331787				9.21715	-5.13589
18.4722	3.19698				18.4601	0.34854				9.22965	-5.13948
18.4962	3.28384				18.4851	0.355662				9.24215	-5.15731
18.5222	3.35673				18.5101	0.344362				9.25464	-5.16955
18.5462	3.44631				18.535	0.338364				9.26714	-5.1833
18.5722	3.53635				18.56	0.359064				9.27964	-5.17216
18.5962	3.60343				18.585	0.346302				9.29214	-5.19748
18.6222	3.67632				18.61	0.342956				9.30463	-5.19043
18.6462	3.734				18.635	0.338296				9.31713	-5.20433
18.6722	3.7834				18.66	0.338631				9.32963	-5.21942
18.6962	3.81674				18.6849	0.339288				9.34212	-5.21829
18.7222	3.83844				18.7099	0.349231				9.35462	-5.22805
18.7462	3.84145				18.7349	0.350266				9.36712	-5.23395
18.7721	3.85452				18.7599	0.34633				9.37962	-5.23908
18.7961	3.83793				18.7849	0.358634				9.39211	-5.24882
18.8221	3.8395				18.8099	0.356788				9.40461	-5.24213
18.8461	3.83501				18.8348	0.364155				9.41711	-5.25803
18.8721	3.85573				18.8598	0.387986				9.42961	-5.26405
18.8961	3.88262				18.8848	0.40987				9.4421	-5.25864
18.9221	3.9316				18.9098	0.439838				9.4546	-5.27138
18.9461	3.98746				18.9348	0.471669				9.4671	-5.26564
18.9721	4.02932				18.9598	0.500656				9.47959	-5.27009
18.9961	4.11128				18.9847	0.546499				9.49209	-5.24579
19.0221	4.19852				19.0097	0.580035				9.50459	-5.25981
19.0461	4.27796				19.0347	0.612277				9.51708	-5.28065
19.0721	4.35992				19.0597	0.646742				9.52958	-5.27632
19.0961	4.45159				19.0847	0.689608				9.54208	-5.26796
19.1221	4.52442				19.1097	0.720086				9.55458	-5.26461
19.146	4.60255				19.1347	0.729403				9.56707	-5.24017
19.172	4.69226				19.1596	0.764121				9.57957	-5.25403
19.196	4.76136				19.1846	0.779498				9.59207	-5.24428
19.222	4.862				19.2096	0.805457				9.60456	-5.23971
19.246	4.8917				19.2346	0.833723				9.61706	-5.22999
19.272	4.96909				19.2596	0.885175				9.62956	-5.22113
19.296	5.01875				19.2846	0.903225				9.64206	-5.20545
19.322	5.07242				19.3095	0.931286				9.65455	-5.16608
19.346	5.07585				19.3345	0.943514				9.66705	-5.12842
19.372	5.07704				19.3595	0.946753				9.67955	-5.0509
19.396	5.05084				19.3845	0.919812				9.69205	-4.98101
19.422	5.02684				19.4095	0.923177				9.70454	-4.79578
19.446	4.98412				19.4345	0.891817				9.71704	-4.58481
19.472	4.92099				19.4594	0.867353				9.72954	-4.24624
19.496	4.86367				19.4844	0.832572				9.74203	-3.83436
19.522	4.77271				19.5094	0.789231				9.75453	-3.34658
19.5459	4.69799				19.5344	0.736783				9.76703	-2.76235
19.5719	4.6007				19.5594	0.70326				9.77953	-2.10893
19.5959	4.50734				19.5844	0.653971				9.79202	-1.37213
19.6219	4.38246				19.6093	0.618864				9.80452	-0.627779
19.6459	4.27296				19.6343	0.599685				9.81702	0.209475
19.6719	4.15192				19.6593	0.572588				9.82952	1.03409
19.6959	4.02984				19.6843	0.555621				9.84201	1.88779
19.7219	3.87829				19.7093	0.538273				9.85451	2.74028
19.7459	3.75896				19.7343	0.53258				9.86701	3.60258
19.7719	3.61134				19.7593	0.49986				9.8795	4.43878
19.7959	3.49848				19.7842	0.495745				9.892	5.27793
19.8219	3.3275				19.8092	0.474539				9.9045	6.05833
19.8459	3.22237				19.8342	0.423027				9.91699	6.82239
19.8719	3.06377				19.8592	0.381652				9.92949	7.54213
19.8959	2.91623				19.8842	0.318627				9.94199	8.20678
19.9218	2.75256				19.9092	0.27397				9.95449	8.84169
19.9458	2.58499				19.9341	0.212682				9.96698	9.41448
19.9718	2.41046				19.9591	0.161516				9.97948	9.93884
19.9958	2.2253				19.9841	0.133047				9.99198	10.3945
20.0218	2.05668				20.0091	0.089416				10.0045	10.8358
20.0458	1.89567				20.0341	0.06869				10.017	11.2012
20.0718	1.74297				20.0591	0.055511				10.0295	11.5288
20.0958	1.59923				20.084	0.046612				10.042	11.7888
20.1218	1.44581				20.109	0.030181				10.0545	12.0045
20.1458	1.33805				20.134	0.012309				10.067	12.1665
20.1718	1.21319				20.159	0.02211				10.0795	12.3162
20.1958	1.1191				20.184	0.033899				10.092	12.3962
20.2218	1.01095				20.209	0.025109				10.1045	12.4652
20.2458	0.938128				20.234	0.033557				10.1169	12.4651
20.2718	0.843462				20.2589	0.041363				10.1294	12.4504
20.2958	0.770414				20.2839	0.043573				10.1419	12.3815
20.3218	0.714596				20.3089	0.039666				10.1544	12.2891
20.3457	0.67213				20.3339	0.043629				10.1669	12.1632
20.3717	0.611082				20.3589	0.03609				10.1794	12.024
20.3957	0.582565				20.3839	0.039456				10.1919	11.8545
20.4217	0.535131				20.4088	0.044252				10.2044	11.6573
20.4457	0.499483				20.4338	0.05027				10.2169	11.448
20.4717	0.511283				20.4588	0.040084				10.2294	11.2429
20.4957	0.48803				20.4838	0.060277				10.2419	10.9821
20.5217	0.488118				20.5088	0.048673				10.2544	10.7627
20.5457	0.474759				20.5338	0.042954				10.2669	10.4892
20.5717	0.480823				20.5587	0.042514				10.2794	10.2425
20.5957	0.489325				20.5837	0.029963				10.2919	9.95939
20.6217	0.481302				20.6087	0.052279				10.3044	9.67259
20.6457	0.495767				20.6337	0.038				10.3169	9.38594
20.6717	0.508152				20.6587	0.041785				10.3294	9.11192
20.6957	0.525973				20.6837	0.039804				10.3419	8.82369
20.7217	0.532844				20.7086	0.032828				10.3544	8.55227
20.7456	0.534516				20.7336	0.049839				10.3669	8.25342
20.7716	0.534637				20.7586	0.058272				10.3794	7.97326
20.7956	0.525435				20.7836	0.05928				10.3919	7.71123
20.8216	0.503556				20.8086	0.06211				10.4044	7.43141
20.8456	0.463778				20.8336	0.068957				10.4169	7.14694
20.8716	0.433872				20.8586	0.089657				10.4294	6.85902
20.8956	0.349894				20.8835	0.095164				10.4419	6.5978
20.9216	0.277594				20.9085	0.126107				10.4544	6.35515
20.9456	0.186633				20.9335	0.15573				10.4669	6.10154
20.9716	0.084391				20.9585	0.17913				10.4794	5.84182
20.9956	-0.031686				20.9835	0.196204				10.4919	5.59539
21.0216	-0.175588				21.0085	0.252222				10.5044	5.35458
21.0456	-0.327251				21.0334	0.276721				10.5169	5.12498
21.0716	-0.492658				21.0584	0.29195				10.5294	4.89557
21.0956	-0.654014				21.0834	0.319898				10.5419	4.66154
21.1215	-0.830974				21.1084	0.341673				10.5544	4.44762
21.1455	-1.01644				21.1334	0.352919				10.5668	4.24482
21.1715	-1.2149				21.1584	0.375671				10.5793	4.03951
21.1955	-1.39315				21.1833	0.401542				10.5918	3.85328
21.2215	-1.62573				21.2083	0.415109				10.6043	3.66558
21.2455	-1.81482				21.2333	0.424816				10.6168	3.50889
21.2715	-2.02393				21.2583	0.445242				10.6293	3.35548
21.2955	-2.22861				21.2833	0.445797				10.6418	3.22464
21.3215	-2.44799				21.3083	0.459544				10.6543	3.13611
21.3455	-2.62391				21.3332	0.473376				10.6668	3.04869
21.3715	-2.85431				21.3582	0.489376				10.6793	3.0168
21.3955	-3.0466				21.3832	0.490947				10.6918	3.01794
21.4215	-3.25228				21.4082	0.493194				10.7043	3.08491
21.4455	-3.44033				21.4332	0.513263				10.7168	3.20541
21.4715	-3.63346				21.4582	0.531184				10.7293	3.44545
21.4955	-3.79977				21.4832	0.518676				10.7418	3.77165
21.5215	-3.99598				21.5081	0.527337				10.7543	4.2304
21.5454	-4.16664				21.5331	0.538119				10.7668	4.82578
21.5714	-4.34027				21.5581	0.541871				10.7793	5.57879
21.5954	-4.51054				21.5831	0.542849				10.7918	6.4906
21.6214	-4.67221				21.6081	0.548393				10.8043	7.61974
21.6454	-4.80338				21.6331	0.542957				10.8168	8.90633
21.6714	-4.93238				21.658	0.551514				10.8293	10.4703
21.6954	-5.05835				21.683	0.561419				10.8418	12.2462
21.7214	-5.13483				21.708	0.563369				10.8543	14.2833
21.7454	-5.22727				21.733	0.562676				10.8668	16.4968
21.7714	-5.28146				21.758	0.569466				10.8793	19.0468
21.7954	-5.34347				21.783	0.56127				10.8918	21.7823
21.8214	-5.39698				21.8079	0.566911				10.9043	24.717
21.8454	-5.43404				21.8329	0.565554				10.9168	27.9592
21.8714	-5.45789				21.8579	0.563187				10.9293	31.2911
21.8954	-5.4753				21.8829	0.561024				10.9418	34.8603
21.9213	-5.50085				21.9079	0.574177				10.9543	38.6273
21.9453	-5.50303				21.9329	0.565244				10.9668	42.4856
21.9713	-5.45661				21.9579	0.585784				10.9793	46.4072
21.9953	-5.4256				21.9828	0.587641				10.9918	50.4432
22.0213	-5.37145				22.0078	0.608077				11.0043	54.518
22.0453	-5.3067				22.0328	0.599125				11.0167	58.6089
22.0713	-5.23638				22.0578	0.597098				11.0292	62.6509
22.0953	-5.16757				22.0828	0.580409				11.0417	66.7656
22.1213	-5.09587				22.1078	0.566603				11.0542	70.7566
22.1453	-5.00887				22.1327	0.575413				11.0667	74.7476
22.1713	-4.91182				22.1577	0.53519				11.0792	78.5969
22.1953	-4.83911				22.1827	0.516607				11.0917	82.3739
22.2213	-4.73304				22.2077	0.503711				11.1042	86.0401
22.2453	-4.63673				22.2327	0.473291				11.1167	89.5748
22.2713	-4.52383				22.2577	0.443355				11.1292	93.0006
22.2953	-4.425				22.2826	0.425872				11.1417	96.2562
22.3212	-4.31277				22.3076	0.420858				11.1542	99.4186
22.3452	-4.23002				22.3326	0.375515				11.1667	102.452
22.3712	-4.10401				22.3576	0.358536				11.1792	105.343
22.3952	-4.00867				22.3826	0.364109				11.1917	108.055
22.4212	-3.90287				22.4076	0.326574				11.2042	110.696
22.4452	-3.79764				22.4325	0.301511				11.2167	113.167
22.4712	-3.68324				22.4575	0.302436				11.2292	115.496
22.4952	-3.60146				22.4825	0.293225				11.2417	117.673
22.5212	-3.48963				22.5075	0.27829				11.2542	119.723
22.5452	-3.38356				22.5325	0.274226				11.2667	121.646
22.5712	-3.27757				22.5575	0.263992				11.2792	123.418
22.5952	-3.20179				22.5825	0.27035				11.2917	125.05
22.6212	-3.10613				22.6074	0.262679				11.3042	126.521
22.6452	-3.01112				22.6324	0.259425				11.3167	127.83
22.6712	-2.91022				22.6574	0.260997				11.3292	128.976
22.6951	-2.82016				22.6824	0.261163				11.3417	129.958
22.7211	-2.73237				22.7074	0.248027				11.3542	130.769
22.7451	-2.65402				22.7324	0.255039				11.3667	131.396
22.7711	-2.5683				22.7573	0.235				11.3792	131.831
22.7951	-2.49538				22.7823	0.245058				11.3917	132.082
22.8211	-2.3941				22.8073	0.22314				11.4042	132.127
22.8451	-2.31802				22.8323	0.234649				11.4167	131.965
22.8711	-2.24359				22.8573	0.225022				11.4292	131.631
22.8951	-2.15555				22.8823	0.22894				11.4417	131
22.9211	-2.07038				22.9072	0.213356				11.4541	130.247
22.9451	-1.99397				22.9322	0.21968				11.4666	129.198
22.9711	-1.91				22.9572	0.231478				11.4791	127.98
22.9951	-1.847				22.9822	0.224802				11.4916	126.5
23.0211	-1.77076				23.0072	0.211772				11.5041	124.825
23.0451	-1.69906				23.0322	0.205554				11.5166	122.963
23.0711	-1.6267				23.0572	0.21491				11.5291	120.882
23.0951	-1.56405				23.0821	0.202927				11.5416	118.632
23.121	-1.50811				23.1071	0.210679				11.5541	116.16
23.145	-1.4322				23.1321	0.205081				11.5666	113.614
23.171	-1.37292				23.1571	0.205812				11.5791	110.845
23.195	-1.30405				23.1821	0.199812				11.5916	107.924
23.221	-1.25255				23.2071	0.198655				11.6041	104.888
23.245	-1.19171				23.232	0.199668				11.6166	101.802
23.271	-1.13172				23.257	0.207019				11.6291	98.5979
23.295	-1.07063				23.282	0.195848				11.6416	95.3191
23.321	-1.00561				23.307	0.208781				11.6541	92.0194
23.345	-0.97225				23.332	0.190986				11.6666	88.7033
23.371	-0.918803				23.357	0.196972				11.6791	85.361
23.395	-0.876001				23.3819	0.184076				11.6916	82.032
23.421	-0.840553				23.4069	0.18546				11.7041	78.6583
23.445	-0.783245				23.4319	0.203767				11.7166	75.3601
23.471	-0.748198				23.4569	0.195234				11.7291	72.163
23.495	-0.691738				23.4819	0.194575				11.7416	68.9552
23.5209	-0.655556				23.5069	0.191162				11.7541	65.8316
23.5449	-0.625409				23.5318	0.199102				11.7666	62.7878
23.5709	-0.582087				23.5568	0.190925				11.7791	59.9056
23.5949	-0.547132				23.5818	0.190375				11.7916	57.0187
23.6209	-0.503865				23.6068	0.1755				11.8041	54.262
23.6449	-0.463994				23.6318	0.19295				11.8166	51.545
23.6709	-0.435597				23.6568	0.184376				11.8291	49.0203
23.6949	-0.389764				23.6818	0.182116				11.8416	46.5994
23.7209	-0.367002				23.7067	0.187012				11.8541	44.2082
23.7449	-0.325748				23.7317	0.189958				11.8666	41.9933
23.7709	-0.298244				23.7567	0.192383				11.8791	39.8641
23.7949	-0.271771				23.7817	0.177819				11.8916	37.8343
23.8209	-0.248103				23.8067	0.188481				11.904	35.9029
23.8449	-0.206269				23.8317	0.188404				11.9165	34.0379
23.8709	-0.18082				23.8566	0.193045				11.929	32.269
23.8948	-0.144241				23.8816	0.176142				11.9415	30.6358
23.9208	-0.10996				23.9066	0.184789				11.954	29.0415
23.9448	-0.082132				23.9316	0.187153				11.9665	27.556
23.9708	-0.041064				23.9566	0.191934				11.979	26.131
23.9948	-0.02285				23.9816	0.180582				11.9915	24.8069
24.0208	0.013417				24.0065	0.208999				12.004	23.5124
24.0448	0.043114				24.0315	0.204027				12.0165	22.3151
24.0708	0.060939				24.0565	0.206031				12.029	21.1515
24.0948	0.092381				24.0815	0.20122				12.0415	20.0381
24.1208	0.121292				24.1065	0.209372				12.054	19.0499
24.1448	0.161841				24.1315	0.20019				12.0665	18.0663
24.1708	0.181149				24.1564	0.19993				12.079	17.1404
24.1948	0.206672				24.1814	0.213284				12.0915	16.2554
24.2208	0.240518				24.2064	0.217511				12.104	15.4404
24.2448	0.256608				24.2314	0.216424				12.1165	14.6487
24.2708	0.298426				24.2564	0.223019				12.129	13.9015
24.2948	0.315896				24.2814	0.226634				12.1415	13.1927
24.3207	0.354061				24.3064	0.23852				12.154	12.5043
24.3447	0.366274				24.3313	0.23407				12.1665	11.8613
24.3707	0.391061				24.3563	0.249225				12.179	11.2529
24.3947	0.40969				24.3813	0.254141				12.1915	10.6796
24.4207	0.442125				24.4063	0.261759				12.204	10.1463
24.4447	0.457857				24.4313	0.280188				12.2165	9.60645
24.4707	0.480689				24.4563	0.307622				12.229	9.12781
24.4947	0.510723				24.4812	0.304522				12.2415	8.62729
24.5207	0.511244				24.5062	0.330277				12.254	8.19096
24.5447	0.541138				24.5312	0.330714				12.2665	7.75282
24.5707	0.571437				24.5562	0.362358				12.279	7.35484
24.5947	0.580139				24.5812	0.366619				12.2915	6.96416
24.6207	0.603066				24.6062	0.377927				12.304	6.58815
24.6447	0.625956				24.6311	0.398081				12.3165	6.2516
24.6706	0.641055				24.6561	0.402797				12.329	5.90482
24.6946	0.673906				24.6811	0.400626				12.3414	5.5827
24.7206	0.677753				24.7061	0.416537				12.3539	5.26677
24.7446	0.699208				24.7311	0.41717				12.3664	4.9621
24.7706	0.710042				24.7561	0.422122				12.3789	4.65217
24.7946	0.734911				24.7811	0.43149				12.3914	4.39666
24.8206	0.756656				24.806	0.418643				12.4039	4.10464
24.8446	0.77015				24.831	0.410528				12.4164	3.85417
24.8706	0.783913				24.856	0.406624				12.4289	3.58159
24.8946	0.798272				24.881	0.365331				12.4414	3.36119
24.9206	0.809827				24.906	0.386658				12.4539	3.11994
24.9446	0.835151				24.931	0.348916				12.4664	2.88303
24.9706	0.84514				24.9559	0.341517				12.4789	2.66755
24.9946	0.861773				24.9809	0.322059				12.4914	2.4431
25.0206	0.884806				25.0059	0.277136				12.5039	2.21887
25.0446	0.874043				25.0309	0.258248				12.5164	2.02516
25.0706	0.911337				25.0559	0.2233				12.5289	1.82163
25.0945	0.91333				25.0809	0.203565				12.5414	1.60208
25.1205	0.913557				25.1058	0.164259				12.5539	1.41711
25.1445	0.914802				25.1308	0.129601				12.5664	1.22641
25.1705	0.921264				25.1558	0.094878				12.5789	1.07419
25.1945	0.909846				25.1808	0.076734				12.5914	0.877448
25.2205	0.89193				25.2058	0.027316				12.6039	0.694076
25.2445	0.889197				25.2308	0.001998				12.6164	0.540139
25.2705	0.867959				25.2557	-0.028473				12.6289	0.362168
25.2945	0.842378				25.2807	-0.048675				12.6414	0.205864
25.3205	0.784263				25.3057	-0.08658				12.6539	0.042738
25.3445	0.775072				25.3307	-0.114132				12.6664	-0.10682
25.3705	0.721795				25.3557	-0.12647				12.6789	-0.255524
25.3945	0.68463				25.3807	-0.143953				12.6914	-0.415025
25.4205	0.648793				25.4057	-0.158934				12.7039	-0.53146
25.4445	0.617776				25.4306	-0.157255				12.7164	-0.661726
25.4704	0.58135				25.4556	-0.149153				12.7289	-0.799318
25.4944	0.523416				25.4806	-0.160157				12.7414	-0.942576
25.5204	0.493519				25.5056	-0.137253				12.7539	-1.06691
25.5444	0.466269				25.5306	-0.112745				12.7664	-1.20808
25.5704	0.442345				25.5556	-0.064253				12.7789	-1.31557
25.5944	0.40871				25.5805	-0.04352				12.7913	-1.42855
25.6204	0.406968				25.6055	0.004759				12.8038	-1.53996
25.6444	0.388355				25.6305	0.072386				12.8163	-1.63952
25.6704	0.393224				25.6555	0.116151				12.8288	-1.73145
25.6944	0.387502				25.6805	0.177453				12.8413	-1.8442
25.7204	0.393203				25.7055	0.241482				12.8538	-1.93064
25.7444	0.420418				25.7304	0.319887				12.8663	-2.01768
25.7704	0.431722				25.7554	0.378574				12.8788	-2.1345
25.7944	0.444188				25.7804	0.435696				12.8913	-2.21102
25.8204	0.483055				25.8054	0.504963				12.9038	-2.30861
25.8444	0.505555				25.8304	0.572537				12.9163	-2.38874
25.8703	0.529622				25.8554	0.62537				12.9288	-2.47485
25.8943	0.556809				25.8803	0.686179				12.9413	-2.56231
25.9203	0.583411				25.9053	0.750238				12.9538	-2.61546
25.9443	0.618068				25.9303	0.806842				12.9663	-2.68698
25.9703	0.655149				25.9553	0.843246				12.9788	-2.76534
25.9943	0.668266				25.9803	0.868707				12.9913	-2.833
26.0203	0.700165				26.0053	0.903612				13.0038	-2.89578
26.0443	0.7196				26.0303	0.940526				13.0163	-2.96337
26.0703	0.750841				26.0552	0.961489				13.0288	-3.00384
26.0943	0.755668				26.0802	0.981002				13.0413	-3.06312
26.1203	0.792513				26.1052	1.01475				13.0538	-3.12316
26.1443	0.799809				26.1302	1.01767				13.0663	-3.19331
26.1703	0.820036				26.1552	1.02432				13.0788	-3.24005
26.1943	0.824312				26.1802	1.01988				13.0913	-3.29416
26.2203	0.837593				26.2051	1.03144				13.1038	-3.34932
26.2443	0.855645				26.2301	1.03306				13.1163	-3.37912
26.2703	0.845489				26.2551	1.02976				13.1288	-3.4523
26.2942	0.868965				26.2801	1.01518				13.1413	-3.47923
26.3202	0.872855				26.3051	1.00426				13.1538	-3.52811
26.3442	0.875034				26.3301	1.00371				13.1663	-3.55383
26.3702	0.890727				26.355	0.990649				13.1788	-3.59595
26.3942	0.865944				26.38	0.965294				13.1913	-3.63665
26.4202	0.886353				26.405	0.950441				13.2038	-3.68785
26.4442	0.87445				26.43	0.943817				13.2163	-3.69984
26.4702	0.883054				26.455	0.933033				13.2287	-3.7555
26.4942	0.883032				26.48	0.916027				13.2412	-3.78646
26.5202	0.88769				26.505	0.894927				13.2537	-3.80294
26.5442	0.878399				26.5299	0.86966				13.2662	-3.83775
26.5702	0.876195				26.5549	0.844942				13.2787	-3.86863
26.5942	0.88742				26.5799	0.818064				13.2912	-3.90109
26.6202	0.891868				26.6049	0.815372				13.3037	-3.92638
26.6442	0.889251				26.6299	0.791415				13.3162	-3.9477
26.6701	0.882419				26.6549	0.784159				13.3287	-3.98906
26.6941	0.882974				26.6798	0.757532				13.3412	-4.00803
26.7201	0.875023				26.7048	0.735671				13.3537	-4.03698
26.7441	0.885285				26.7298	0.711497				13.3662	-4.05987
26.7701	0.884121				26.7548	0.709667				13.3787	-4.09194
26.7941	0.884803				26.7798	0.71176				13.3912	-4.10028
26.8201	0.8935				26.8048	0.677299				13.4037	-4.10665
26.8441	0.884846				26.8297	0.647954				13.4162	-4.14807
26.8701	0.884717				26.8547	0.652885				13.4287	-4.17777
26.8941	0.880819				26.8797	0.624637				13.4412	-4.18279
26.9201	0.885315				26.9047	0.614343				13.4537	-4.21116
26.9441	0.88464				26.9297	0.605746				13.4662	-4.2615
26.9701	0.888908				26.9547	0.586265				13.4787	-4.27415
26.9941	0.899242				26.9796	0.567841				13.4912	-4.29593
27.0201	0.903891				27.0046	0.561371				13.5037	-4.30511
27.0441	0.903964				27.0296	0.554387				13.5162	-4.32692
27.07	0.907599				27.0546	0.547918				13.5287	-4.36
27.094	0.898939				27.0796	0.534401				13.5412	-4.33918
27.12	0.898843				27.1046	0.518074				13.5537	-4.36016
27.144	0.910627				27.1296	0.516032				13.5662	-4.39423
27.17	0.908801				27.1545	0.507835				13.5787	-4.40262
27.194	0.920718				27.1795	0.501478				13.5912	-4.39485
27.22	0.912393				27.2045	0.494298				13.6037	-4.40776
27.244	0.938396				27.2295	0.487657				13.6162	-4.40375
27.27	0.933981				27.2545	0.485244				13.6287	-4.39596
27.294	0.928848				27.2795	0.472256				13.6412	-4.40842
27.32	0.943722				27.3044	0.473885				13.6537	-4.38737
27.344	0.922314				27.3294	0.454859				13.6662	-4.40553
27.37	0.950424				27.3544	0.450889				13.6786	-4.37698
27.394	0.958164				27.3794	0.451428				13.6911	-4.3864
27.42	0.971124				27.4044	0.44123				13.7036	-4.34768
27.444	0.969513				27.4294	0.425547				13.7161	-4.33828
27.4699	0.98333				27.4543	0.425279				13.7286	-4.3331
27.4939	0.973467				27.4793	0.415567				13.7411	-4.31043
27.5199	0.988272				27.5043	0.443151				13.7536	-4.28641
27.5439	1.00985				27.5293	0.416882				13.7661	-4.28744
27.5699	0.999566				27.5543	0.409261				13.7786	-4.2807
27.5939	1.00892				27.5793	0.396395				13.7911	-4.2749
27.6199	1.01993				27.6042	0.394098				13.8036	-4.27022
27.6439	1.02966				27.6292	0.389922				13.8161	-4.25388
27.6699	1.02122				27.6542	0.397391				13.8286	-4.26215
27.6939	1.05698				27.6792	0.382391				13.8411	-4.29392
27.7199	1.05652				27.7042	0.378996				13.8536	-4.28784
27.7439	1.05765				27.7292	0.380435				13.8661	-4.31023
27.7699	1.07136				27.7542	0.363803				13.8786	-4.33295
27.7939	1.07296				27.7791	0.346313				13.8911	-4.34773
27.8199	1.08413				27.8041	0.371096				13.9036	-4.3695
27.8439	1.10147				27.8291	0.357278				13.9161	-4.3884
27.8698	1.11423				27.8541	0.357313				13.9286	-4.42107
27.8938	1.11909				27.8791	0.348271				13.9411	-4.43682
27.9198	1.11404				27.9041	0.348976				13.9536	-4.4766
27.9438	1.12352				27.929	0.335516				13.9661	-4.51326
27.9698	1.13399				27.954	0.343845				13.9786	-4.52473
27.9938	1.14616				27.979	0.34785				13.9911	-4.55706
28.0198	1.14297				28.004	0.330162				14.0036	-4.61641
28.0438	1.14905				28.029	0.318055				14.0161	-4.64042
28.0698	1.15023				28.054	0.326374				14.0286	-4.69277
28.0938	1.14686				28.0789	0.331066				14.0411	-4.72601
28.1198	1.17231				28.1039	0.307426				14.0536	-4.77828
28.1438	1.16671				28.1289	0.31127				14.0661	-4.80865
28.1698	1.17038				28.1539	0.306354				14.0786	-4.83837
28.1938	1.17665				28.1789	0.302588				14.0911	-4.8929
28.2198	1.18756				28.2039	0.313358				14.1036	-4.93701
28.2437	1.18755				28.2288	0.29609				14.116	-4.96944
28.2697	1.19981				28.2538	0.282559				14.1285	-5.04334
28.2937	1.20071				28.2788	0.292198				14.141	-5.0739
28.3197	1.20021				28.3038	0.291825				14.1535	-5.1107
28.3437	1.19849				28.3288	0.293484				14.166	-5.15157
28.3697	1.22351				28.3538	0.281019				14.1785	-5.19982
28.3937	1.19682				28.3788	0.269091				14.191	-5.22808
28.4197	1.20831				28.4037	0.281329				14.2035	-5.29561
28.4437	1.20779				28.4287	0.261253				14.216	-5.33378
28.4697	1.21145				28.4537	0.266894				14.2285	-5.38113
28.4937	1.22129				28.4787	0.267646				14.241	-5.42557
28.5197	1.20988				28.5037	0.263243				14.2535	-5.51202
28.5437	1.22002				28.5287	0.250332				14.266	-5.54295
28.5697	1.23159				28.5536	0.250336				14.2785	-5.56565
28.5937	1.20332				28.5786	0.252876				14.291	-5.63852
28.6197	1.22748				28.6036	0.255051				14.3035	-5.67466
28.6437	1.21967				28.6286	0.251014				14.316	-5.73925
28.6696	1.23363				28.6536	0.241006				14.3285	-5.77471
28.6936	1.22121				28.6786	0.244827				14.341	-5.84525
28.7196	1.22604				28.7035	0.241491				14.3535	-5.87489
28.7436	1.22158				28.7285	0.239418				14.366	-5.93896
28.7696	1.23351				28.7535	0.224325				14.3785	-5.98255
28.7936	1.24108				28.7785	0.224377				14.391	-6.03232
28.8196	1.22895				28.8035	0.229536				14.4035	-6.07497
28.8436	1.21536				28.8285	0.224558				14.416	-6.14013
28.8696	1.21899				28.8535	0.21469				14.4285	-6.19027
28.8936	1.21578				28.8784	0.22718				14.441	-6.23587
28.9196	1.2124				28.9034	0.20023				14.4535	-6.30927
28.9436	1.20928				28.9284	0.207641				14.466	-6.36729
28.9696	1.20941				28.9534	0.22213				14.4785	-6.41402
28.9936	1.19128				28.9784	0.221918				14.491	-6.47518
29.0196	1.21458				29.0034	0.208859				14.5035	-6.5249
29.0435	1.19465				29.0283	0.213159				14.516	-6.59
29.0695	1.2106				29.0533	0.216757				14.5285	-6.65078
29.0935	1.20596				29.0783	0.193629				14.541	-6.69403
29.1195	1.17889				29.1033	0.197628				14.5535	-6.74938
29.1435	1.18729				29.1283	0.197726				14.5659	-6.82259
29.1695	1.1763				29.1533	0.198633				14.5784	-6.88083
29.1935	1.18541				29.1782	0.181064				14.5909	-6.913
29.2195	1.17249				29.2032	0.183625				14.6034	-6.98718
29.2435	1.17884				29.2282	0.190688				14.6159	-7.05489
29.2695	1.16011				29.2532	0.180393				14.6284	-7.11848
29.2935	1.15201				29.2782	0.17902				14.6409	-7.16743
29.3195	1.14703				29.3032	0.179623				14.6534	-7.22207
29.3435	1.13765				29.3281	0.172457				14.6659	-7.30145
29.3695	1.14438				29.3531	0.167943				14.6784	-7.35194
29.3935	1.1252				29.3781	0.173438				14.6909	-7.42693
29.4195	1.1276				29.4031	0.171921				14.7034	-7.46237
29.4434	1.12229				29.4281	0.17007				14.7159	-7.52179
29.4694	1.12228				29.4531	0.17434				14.7284	-7.58956
29.4934	1.10775				29.4781	0.161225				14.7409	-7.64372
29.5194	1.10847				29.503	0.165698				14.7534	-7.69252
29.5434	1.09346				29.528	0.154199				14.7659	-7.74658
29.5694	1.09421				29.553	0.159203				14.7784	-7.80022
29.5934	1.08146				29.578	0.15982				14.7909	-7.87986
29.6194	1.09424				29.603	0.148003				14.8034	-7.91869
29.6434	1.06587				29.628	0.150343				14.8159	-7.97697
29.6694	1.06899				29.6529	0.158231				14.8284	-8.03879
29.6934	1.07392				29.6779	0.151582				14.8409	-8.0771
29.7194	1.05178				29.7029	0.167935				14.8534	-8.14684
29.7434	1.05638				29.7279	0.157047				14.8659	-8.19318
29.7694	1.05222				29.7529	0.168321				14.8784	-8.26995
29.7934	1.03068				29.7779	0.134497				14.8909	-8.31048
29.8194	1.04205				29.8028	0.147342				14.9034	-8.36149
29.8433	1.03942				29.8278	0.140457				14.9159	-8.41562
29.8693	1.03509				29.8528	0.145193				14.9284	-8.4627
29.8933	1.02378				29.8778	0.13837				14.9409	-8.53731
29.9193	1.02952				29.9028	0.127174				14.9534	-8.60166
29.9433	1.01028				29.9278	0.13207				14.9659	-8.65327
29.9693	1.02874				29.9527	0.128875				14.9784	-8.72239
29.9933	1.00366				29.9777	0.122002				14.9909	-8.76291
										15.0033	-8.84012
										15.0158	-8.8807
										15.0283	-8.93795
										15.0408	-9.00333
										15.0533	-9.03109
										15.0658	-9.10424
										15.0783	-9.14638
										15.0908	-9.20869
										15.1033	-9.25765
										15.1158	-9.3047
										15.1283	-9.36543
										15.1408	-9.40502
										15.1533	-9.44952
										15.1658	-9.50925
										15.1783	-9.55872
										15.1908	-9.61095
										15.2033	-9.6433
										15.2158	-9.69646
										15.2283	-9.7429
										15.2408	-9.78142
										15.2533	-9.82469
										15.2658	-9.90343
										15.2783	-9.93249
										15.2908	-9.9724
										15.3033	-10.0123
										15.3158	-10.0733
										15.3283	-10.1099
										15.3408	-10.1375
										15.3533	-10.182
										15.3658	-10.2425
										15.3783	-10.2726
										15.3908	-10.3081
										15.4033	-10.366
										15.4158	-10.397
										15.4283	-10.4378
										15.4408	-10.4764
										15.4532	-10.5066
										15.4657	-10.5464
										15.4782	-10.5759
										15.4907	-10.6527
										15.5032	-10.6861
										15.5157	-10.7033
										15.5282	-10.7329
										15.5407	-10.781
										15.5532	-10.8001
										15.5657	-10.847
										15.5782	-10.9038
										15.5907	-10.9337
										15.6032	-10.9793
										15.6157	-11.0033
										15.6282	-11.0523
										15.6407	-11.0647
										15.6532	-11.1094
										15.6657	-11.1577
										15.6782	-11.1825
										15.6907	-11.2039
										15.7032	-11.2476
										15.7157	-11.271
										15.7282	-11.3134
										15.7407	-11.3375
										15.7532	-11.3862
										15.7657	-11.405
										15.7782	-11.4467
										15.7907	-11.4662
										15.8032	-11.5118
										15.8157	-11.5217
										15.8282	-11.5694
										15.8407	-11.577
										15.8532	-11.6343
										15.8657	-11.6633
										15.8782	-11.6804
										15.8907	-11.7235
										15.9031	-11.7411
										15.9156	-11.7809
										15.9281	-11.8017
										15.9406	-11.8212
										15.9531	-11.8525
										15.9656	-11.8834
										15.9781	-11.8946
										15.9906	-11.9414
										16.0031	-11.9624
										16.0156	-11.9971
										16.0281	-12.041
										16.0406	-12.0476
										16.0531	-12.059
										16.0656	-12.0895
										16.0781	-12.1167
										16.0906	-12.1439
										16.1031	-12.1782
										16.1156	-12.209
										16.1281	-12.2108
										16.1406	-12.2497
										16.1531	-12.2704
										16.1656	-12.303
										16.1781	-12.3235
										16.1906	-12.3521
										16.2031	-12.3719
										16.2156	-12.3878
										16.2281	-12.4122
										16.2406	-12.4361
										16.2531	-12.4654
										16.2656	-12.4912
										16.2781	-12.4925
										16.2906	-12.5094
										16.3031	-12.5436
										16.3156	-12.5799
										16.3281	-12.5986
										16.3405	-12.6184
										16.353	-12.6337
										16.3655	-12.6721
										16.378	-12.6674
										16.3905	-12.7097
										16.403	-12.725
										16.4155	-12.7545
										16.428	-12.7542
										16.4405	-12.7597
										16.453	-12.8015
										16.4655	-12.8463
										16.478	-12.8416
										16.4905	-12.8767
										16.503	-12.8755
										16.5155	-12.9024
										16.528	-12.9209
										16.5405	-12.935
										16.553	-12.9589
										16.5655	-12.9909
										16.578	-13.0034
										16.5905	-13.0142
										16.603	-13.0356
										16.6155	-13.0555
										16.628	-13.064
										16.6405	-13.1029
										16.653	-13.1242
										16.6655	-13.1345
										16.678	-13.1449
										16.6905	-13.1594
										16.703	-13.1965
										16.7155	-13.1963
										16.728	-13.2024
										16.7405	-13.2376
										16.753	-13.2408
										16.7655	-13.2663
										16.778	-13.2953
										16.7904	-13.2733
										16.8029	-13.3021
										16.8154	-13.3316
										16.8279	-13.3334
										16.8404	-13.3449
										16.8529	-13.3696
										16.8654	-13.3941
										16.8779	-13.3904
										16.8904	-13.3968
										16.9029	-13.4352
										16.9154	-13.4433
										16.9279	-13.4544
										16.9404	-13.4596
										16.9529	-13.4889
										16.9654	-13.4958
										16.9779	-13.5264
										16.9904	-13.5492
										17.0029	-13.5489
										17.0154	-13.5579
										17.0279	-13.5998
										17.0404	-13.6034
										17.0529	-13.6152
										17.0654	-13.6355
										17.0779	-13.64
										17.0904	-13.6537
										17.1029	-13.6511
										17.1154	-13.6822
										17.1279	-13.7084
										17.1404	-13.7296
										17.1529	-13.73
										17.1654	-13.7469
										17.1779	-13.7465
										17.1904	-13.7748
										17.2029	-13.7625
										17.2154	-13.7967
										17.2279	-13.7903
										17.2403	-13.8369
										17.2528	-13.8332
										17.2653	-13.8467
										17.2778	-13.8552
										17.2903	-13.8908
										17.3028	-13.9103
										17.3153	-13.9162
										17.3278	-13.9168
										17.3403	-13.95
										17.3528	-13.9535
										17.3653	-13.9595
										17.3778	-13.9496
										17.3903	-13.9905
										17.4028	-14.0203
										17.4153	-14.0161
										17.4278	-14.0156
										17.4403	-14.0436
										17.4528	-14.0369
										17.4653	-14.0812
										17.4778	-14.0723
										17.4903	-14.0968
										17.5028	-14.1023
										17.5153	-14.121
										17.5278	-14.1372
										17.5403	-14.1454
										17.5528	-14.1527
										17.5653	-14.1782
										17.5778	-14.1808
										17.5903	-14.1995
										17.6028	-14.2399
										17.6153	-14.2441
										17.6278	-14.2258
										17.6403	-14.2628
										17.6528	-14.2713
										17.6653	-14.2906
										17.6777	-14.2907
										17.6902	-14.3176
										17.7027	-14.3417
										17.7152	-14.3513
										17.7277	-14.3607
										17.7402	-14.3659
										17.7527	-14.3807
										17.7652	-14.3864
										17.7777	-14.4278
										17.7902	-14.432
										17.8027	-14.4447
										17.8152	-14.463
										17.8277	-14.4702
										17.8402	-14.4929
										17.8527	-14.4965
										17.8652	-14.4991
										17.8777	-14.5101
										17.8902	-14.5271
										17.9027	-14.54
										17.9152	-14.5498
										17.9277	-14.5657
										17.9402	-14.5706
										17.9527	-14.5971
										17.9652	-14.5965
										17.9777	-14.6114
										17.9902	-14.6227
										18.0027	-14.6155
										18.0152	-14.6227
										18.0277	-14.6432
										18.0402	-14.6581
										18.0527	-14.6472
										18.0652	-14.6762
										18.0777	-14.696
										18.0902	-14.7008
										18.1027	-14.6966
										18.1151	-14.7065
										18.1276	-14.7309
										18.1401	-14.7351
										18.1526	-14.7263
										18.1651	-14.7402
										18.1776	-14.7418
										18.1901	-14.7565
										18.2026	-14.7589
										18.2151	-14.7765
										18.2276	-14.766
										18.2401	-14.7981
										18.2526	-14.8055
										18.2651	-14.8066
										18.2776	-14.7834
										18.2901	-14.7359
										18.3026	-14.7316
										18.3151	-14.7193
										18.3276	-14.7526
										18.3401	-14.7727
										18.3526	-14.777
										18.3651	-14.7977
										18.3776	-14.8083
										18.3901	-14.8067
										18.4026	-14.834
										18.4151	-14.8436
										18.4276	-14.856
										18.4401	-14.8651
										18.4526	-14.8687
										18.4651	-14.8803
										18.4776	-14.8566
										18.4901	-14.8796
										18.5026	-14.8807
										18.5151	-14.8992
										18.5276	-14.8871
										18.5401	-14.8934
										18.5526	-14.8855
										18.565	-14.8931
										18.5775	-14.8958
										18.59	-14.8914
										18.6025	-14.8845
										18.615	-14.8905
										18.6275	-14.8768
										18.64	-14.8785
										18.6525	-14.8668
										18.665	-14.8805
										18.6775	-14.8674
										18.69	-14.8654
										18.7025	-14.8707
										18.715	-14.884
										18.7275	-14.8587
										18.74	-14.8608
										18.7525	-14.8496
										18.765	-14.8569
										18.7775	-14.8519
										18.79	-14.8655
										18.8025	-14.8586
										18.815	-14.8746
										18.8275	-14.8784
										18.84	-14.8722
										18.8525	-14.8682
										18.865	-14.8796
										18.8775	-14.8911
										18.89	-14.872
										18.9025	-14.8841
										18.915	-14.8856
										18.9275	-14.8981
										18.94	-14.897
										18.9525	-14.9009
										18.965	-14.9242
										18.9775	-14.9205
										18.99	-14.927
										19.0025	-14.9494
										19.0149	-14.9503
										19.0274	-14.9571
										19.0399	-14.9616
										19.0524	-14.9473
										19.0649	-14.9777
										19.0774	-14.9973
										19.0899	-14.9853
										19.1024	-15.0151
										19.1149	-15.0202
										19.1274	-15.0245
										19.1399	-15.0162
										19.1524	-15.0213
										19.1649	-15.0434
										19.1774	-15.0385
										19.1899	-15.0419
										19.2024	-15.0615
										19.2149	-15.069
										19.2274	-15.0762
										19.2399	-15.0897
										19.2524	-15.0825
										19.2649	-15.1105
										19.2774	-15.1066
										19.2899	-15.1231
										19.3024	-15.1266
										19.3149	-15.1478
										19.3274	-15.1314
										19.3399	-15.1405
										19.3524	-15.1246
										19.3649	-15.1562
										19.3774	-15.1533
										19.3899	-15.15
										19.4024	-15.1462
										19.4149	-15.1495
										19.4274	-15.1343
										19.4399	-15.1392
										19.4523	-15.1451
										19.4648	-15.1334
										19.4773	-15.1279
										19.4898	-15.1351
										19.5023	-15.1059
										19.5148	-15.099
										19.5273	-15.1201
										19.5398	-15.1073
										19.5523	-15.0997
										19.5648	-15.101
										19.5773	-15.0983
										19.5898	-15.1085
										19.6023	-15.1078
										19.6148	-15.1186
										19.6273	-15.1285
										19.6398	-15.1402
										19.6523	-15.1547
										19.6648	-15.1737
										19.6773	-15.2001
										19.6898	-15.2181
										19.7023	-15.226
										19.7148	-15.2296
										19.7273	-15.2489
										19.7398	-15.3085
										19.7523	-15.3298
										19.7648	-15.3615
										19.7773	-15.3735
										19.7898	-15.4345
										19.8023	-15.4515
										19.8148	-15.479
										19.8273	-15.5068
										19.8398	-15.5447
										19.8523	-15.5867
										19.8648	-15.6084
										19.8773	-15.6148
										19.8898	-15.6893
										19.9022	-15.7247
										19.9147	-15.7316
										19.9272	-15.7537
										19.9397	-15.7925
										19.9522	-15.8334
										19.9647	-15.8417
										19.9772	-15.855
										19.9897	-15.8958
										20.0022	-15.914
										20.0147	-15.918
										20.0272	-15.9474
										20.0397	-15.9764
										20.0522	-15.981
										20.0647	-16.0016
										20.0772	-16.026
										20.0897	-16.0462
										20.1022	-16.0586
										20.1147	-16.0679
										20.1272	-16.0893
										20.1397	-16.1176
										20.1522	-16.1077
										20.1647	-16.1263
										20.1772	-16.1287
										20.1897	-16.1598
										20.2022	-16.1631
										20.2147	-16.1685
										20.2272	-16.1749
										20.2397	-16.194
										20.2522	-16.1748
										20.2647	-16.1984
										20.2772	-16.1902
										20.2897	-16.2156
										20.3022	-16.2114
										20.3147	-16.2134
										20.3272	-16.2218
										20.3396	-16.2091
										20.3521	-16.1967
										20.3646	-16.2171
										20.3771	-16.2068
										20.3896	-16.1976
										20.4021	-16.2054
										20.4146	-16.1979
										20.4271	-16.1792
										20.4396	-16.1951
										20.4521	-16.2003
										20.4646	-16.1682
										20.4771	-16.1437
										20.4896	-16.1461
										20.5021	-16.132
										20.5146	-16.123
										20.5271	-16.1133
										20.5396	-16.0944
										20.5521	-16.0887
										20.5646	-16.0832
										20.5771	-16.0633
										20.5896	-16.0605
										20.6021	-16.0417
										20.6146	-16.0324
										20.6271	-16.0225
										20.6396	-16.0135
										20.6521	-15.9873
										20.6646	-15.9972
										20.6771	-15.9793
										20.6896	-15.9541
										20.7021	-15.9467
										20.7146	-15.9387
										20.7271	-15.929
										20.7396	-15.927
										20.7521	-15.9042
										20.7646	-15.9216
										20.7771	-15.9151
										20.7895	-15.8996
										20.802	-15.8986
										20.8145	-15.9038
										20.827	-15.8797
										20.8395	-15.8959
										20.852	-15.8777
										20.8645	-15.8784
										20.877	-15.8882
										20.8895	-15.8913
										20.902	-15.8791
										20.9145	-15.8753
										20.927	-15.886
										20.9395	-15.8547
										20.952	-15.8862
										20.9645	-15.8763
										20.977	-15.877
										20.9895	-15.9071
										21.002	-15.9022
										21.0145	-15.8948
										21.027	-15.9033
										21.0395	-15.882
										21.052	-15.8973
										21.0645	-15.9012
										21.077	-15.9073
										21.0895	-15.9054
										21.102	-15.9223
										21.1145	-15.9114
										21.127	-15.9217
										21.1395	-15.9178
										21.152	-15.9042
										21.1645	-15.9169
										21.177	-15.9295
										21.1895	-15.9288
										21.202	-15.9245
										21.2145	-15.9294
										21.2269	-15.9315
										21.2394	-15.9437
										21.2519	-15.9574
										21.2644	-15.9533
										21.2769	-15.9366
										21.2894	-15.9561
										21.3019	-15.9541
										21.3144	-15.9267
										21.3269	-15.9739
										21.3394	-15.9687
										21.3519	-15.9744
										21.3644	-15.9712
										21.3769	-16.0034
										21.3894	-15.9818
										21.4019	-15.9817
										21.4144	-15.9779
										21.4269	-15.997
										21.4394	-16.0095
										21.4519	-15.9941
										21.4644	-16.0093
										21.4769	-16.0252
										21.4894	-16.014
										21.5019	-16.0307
										21.5144	-16.0254
										21.5269	-16.0364
										21.5394	-16.0261
										21.5519	-16.0388
										21.5644	-16.0384
										21.5769	-16.0473
										21.5894	-16.0463
										21.6019	-16.0367
										21.6144	-16.0488
										21.6269	-16.0519
										21.6394	-16.0512
										21.6519	-16.0587
										21.6644	-16.0581
										21.6768	-16.0695
										21.6893	-16.0534
										21.7018	-16.0655
										21.7143	-16.0835
										21.7268	-16.0877
										21.7393	-16.0588
										21.7518	-16.0705
										21.7643	-16.0597
										21.7768	-16.0704
										21.7893	-16.0942
										21.8018	-16.0804
										21.8143	-16.0937
										21.8268	-16.0893
										21.8393	-16.0768
										21.8518	-16.0815
										21.8643	-16.0996
										21.8768	-16.088
										21.8893	-16.1053
										21.9018	-16.0886
										21.9143	-16.0896
										21.9268	-16.0964
										21.9393	-16.1003
										21.9518	-16.1185
										21.9643	-16.1179
										21.9768	-16.0878
										21.9893	-16.0889
										22.0018	-16.127
										22.0143	-16.0939
										22.0268	-16.1083
										22.0393	-16.119
										22.0518	-16.1141
										22.0643	-16.1028
										22.0768	-16.1144
										22.0893	-16.1034
										22.1018	-16.0964
										22.1142	-16.0933
										22.1267	-16.0958
										22.1392	-16.105
										22.1517	-16.0991
										22.1642	-16.1047
										22.1767	-16.0915
										22.1892	-16.0991
										22.2017	-16.0762
										22.2142	-16.069
										22.2267	-16.0759
										22.2392	-16.085
										22.2517	-16.0824
										22.2642	-16.081
										22.2767	-16.0592
										22.2892	-16.0743
										22.3017	-16.0562
										22.3142	-16.0394
										22.3267	-16.0352
										22.3392	-16.0553
										22.3517	-16.0239
										22.3642	-16.0148
										22.3767	-16.0139
										22.3892	-16.0076
										22.4017	-15.9973
										22.4142	-15.9949
										22.4267	-15.982
										22.4392	-15.9569
										22.4517	-15.9489
										22.4642	-15.9495
										22.4767	-15.9535
										22.4892	-15.9272
										22.5017	-15.9232
										22.5142	-15.9077
										22.5267	-15.8796
										22.5392	-15.8679
										22.5517	-15.8526
										22.5642	-15.8467
										22.5766	-15.8126
										22.5891	-15.8115
										22.6016	-15.7963
										22.6141	-15.7628
										22.6266	-15.7532
										22.6391	-15.7258
										22.6516	-15.721
										22.6641	-15.6892
										22.6766	-15.6587
										22.6891	-15.6356
										22.7016	-15.6033
										22.7141	-15.5909
										22.7266	-15.553
										22.7391	-15.5251
										22.7516	-15.5154
										22.7641	-15.4736
										22.7766	-15.4447
										22.7891	-15.398
										22.8016	-15.374
										22.8141	-15.3427
										22.8266	-15.3015
										22.8391	-15.2756
										22.8516	-15.233
										22.8641	-15.1766
										22.8766	-15.1457
										22.8891	-15.0986
										22.9016	-15.0592
										22.9141	-15.0288
										22.9266	-14.9764
										22.9391	-14.9281
										22.9516	-14.891
										22.9641	-14.8192
										22.9766	-14.783
										22.9891	-14.7312
										23.0016	-14.6846
										23.014	-14.6332
										23.0265	-14.5596
										23.039	-14.5021
										23.0515	-14.4489
										23.064	-14.3683
										23.0765	-14.338
										23.089	-14.2766
										23.1015	-14.2038
										23.114	-14.1545
										23.1265	-14.0821
										23.139	-14.0108
										23.1515	-13.9437
										23.164	-13.8808
										23.1765	-13.8119
										23.189	-13.7552
										23.2015	-13.6896
										23.214	-13.619
										23.2265	-13.565
										23.239	-13.4987
										23.2515	-13.4325
										23.264	-13.3659
										23.2765	-13.2634
										23.289	-13.2258
										23.3015	-13.1393
										23.314	-13.0702
										23.3265	-13.0193
										23.339	-12.9336
										23.3515	-12.8603
										23.364	-12.8006
										23.3765	-12.7409
										23.389	-12.6755
										23.4015	-12.6004
										23.414	-12.5338
										23.4265	-12.475
										23.439	-12.4117
										23.4515	-12.3497
										23.4639	-12.2683
										23.4764	-12.21
										23.4889	-12.1447
										23.5014	-12.0853
										23.5139	-12.0161
										23.5264	-11.9436
										23.5389	-11.8946
										23.5514	-11.8499
										23.5639	-11.7796
										23.5764	-11.7174
										23.5889	-11.6615
										23.6014	-11.5992
										23.6139	-11.5488
										23.6264	-11.4835
										23.6389	-11.4212
										23.6514	-11.3954
										23.6639	-11.3364
										23.6764	-11.275
										23.6889	-11.2248
										23.7014	-11.1872
										23.7139	-11.1276
										23.7264	-11.0657
										23.7389	-11.0137
										23.7514	-10.9836
										23.7639	-10.9148
										23.7764	-10.861
										23.7889	-10.826
										23.8014	-10.7782
										23.8139	-10.7371
										23.8264	-10.6735
										23.8389	-10.643
										23.8514	-10.6045
										23.8639	-10.5618
										23.8764	-10.5121
										23.8889	-10.4715
										23.9013	-10.4353
										23.9138	-10.3952
										23.9263	-10.3508
										23.9388	-10.317
										23.9513	-10.2912
										23.9638	-10.2367
										23.9763	-10.2031
										23.9888	-10.1624
										24.0013	-10.1325
										24.0138	-10.0966
										24.0263	-10.0657
										24.0388	-10.0166
										24.0513	-9.9736
										24.0638	-9.94009
										24.0763	-9.91511
										24.0888	-9.89342
										24.1013	-9.84388
										24.1138	-9.81479
										24.1263	-9.79217
										24.1388	-9.74317
										24.1513	-9.71037
										24.1638	-9.68878
										24.1763	-9.65629
										24.1888	-9.62808
										24.2013	-9.61475
										24.2138	-9.55893
										24.2263	-9.54055
										24.2388	-9.51111
										24.2513	-9.50103
										24.2638	-9.45071
										24.2763	-9.41516
										24.2888	-9.39809
										24.3013	-9.38133
										24.3138	-9.33444
										24.3263	-9.31776
										24.3388	-9.2909
										24.3512	-9.2551
										24.3637	-9.23264
										24.3762	-9.20376
										24.3887	-9.18765
										24.4012	-9.15888
										24.4137	-9.12831
										24.4262	-9.08802
										24.4387	-9.07188
										24.4512	-9.04584
										24.4637	-9.01168
										24.4762	-9.0097
										24.4887	-8.94878
										24.5012	-8.94504
										24.5137	-8.92653
										24.5262	-8.90004
										24.5387	-8.86988
										24.5512	-8.83473
										24.5637	-8.82126
										24.5762	-8.79385
										24.5887	-8.77635
										24.6012	-8.74041
										24.6137	-8.72282
										24.6262	-8.71283
										24.6387	-8.6933
										24.6512	-8.65957
										24.6637	-8.63132
										24.6762	-8.59856
										24.6887	-8.58063
										24.7012	-8.54432
										24.7137	-8.54072
										24.7262	-8.50462
										24.7387	-8.48612
										24.7512	-8.48208
										24.7637	-8.44321
										24.7762	-8.42826
										24.7886	-8.37734
										24.8011	-8.37645
										24.8136	-8.35225
										24.8261	-8.35182
										24.8386	-8.30237
										24.8511	-8.29624
										24.8636	-8.26524
										24.8761	-8.25024
										24.8886	-8.20875
										24.9011	-8.19993
										24.9136	-8.1729
										24.9261	-8.16173
										24.9386	-8.12872
										24.9511	-8.102
[truncated: 4 more rows]
