# Supplementary material for: The intrinsically disordered cytoplasmic tail of a dendrite branching receptor uses two distinct mechanisms to regulate the actin cytoskeleton
Source: eLife journal article supplement (doi:10.7554/elife.88492), 2023-07-17
Supplement: fig3-figsupp1-data2 [file Figure 3 - figure Supplement 1C Source Data.xlsx]

## Sheet: Sheet1
	DMSO			Rapamycin
	mL	mAU		mL	mAU
	-0.003135	0		0.000881	-0.000411
	0.096801	0.597768		0.200832	0.099904
	0.196737	0.782626		0.40078	0.139706
	0.296674	0.558882		0.600731	0.191183
	0.39661	0.383631		0.800678	0.224163
	0.496546	0.277841		1.00063	0.257793
	0.596482	0.143952		1.20058	0.278265
	0.696419	0.083652		1.40053	0.273275
	0.796355	0.039191		1.60048	0.270389
	0.896291	-0.019031		1.80043	0.232099
	0.996227	-0.050793		2.00038	0.192472
	1.09616	-0.069285		2.20032	0.156636
	1.1961	-0.082671		2.40028	0.113707
	1.29604	-0.099008		2.60023	0.069977
	1.39597	-0.108745		2.80017	0.053762
	1.49591	-0.11458		3.00013	0.056517
	1.59584	-0.112443		3.20007	0.051459
	1.69578	-0.096378		3.40002	0.088241
	1.79572	-0.111418		3.59997	0.149723
	1.89565	-0.111429		3.79992	0.200871
	1.99559	-0.103752		3.99987	0.250197
	2.09553	-0.112423		4.19982	0.316824
	2.19546	-0.128426		4.39977	0.342897
	2.2954	-0.137936		4.59972	0.347704
	2.39534	-0.116162		4.79967	0.364452
	2.49527	-0.124318		4.99962	0.350258
	2.59521	-0.132695		5.19957	0.302046
	2.69514	-0.143108		5.39952	0.266428
	2.79508	-0.140206		5.59947	0.225393
	2.89502	-0.15458		5.79942	0.185489
	2.99495	-0.148831		5.99937	0.126407
	3.09489	-0.147373		6.19932	0.106885
	3.19482	-0.153099		6.39926	0.100999
	3.29476	-0.161398		6.59922	0.108165
	3.3947	-0.151674		6.79916	0.13272
	3.49463	-0.150479		6.99911	0.191271
	3.59457	-0.164493		7.19907	0.306709
	3.69451	-0.158079		7.39901	0.323171
	3.79444	-0.159259		7.59896	0.365901
	3.89438	-0.169526		7.79891	0.391414
	3.99431	-0.153731		7.99886	0.394499
	4.09425	-0.164789		8.19881	0.40052
	4.19419	-0.163795		8.39876	0.402477
	4.29412	-0.169628		8.59871	0.38389
	4.39406	-0.151848		8.79866	0.34268
	4.49399	-0.174119		8.99861	0.287403
	4.59393	-0.161609		9.19856	0.290949
	4.69387	-0.155852		9.39851	45.4837
	4.7938	-0.156442		9.59846	139.87
	4.89374	-0.1556		9.79841	109.03
	4.99368	-0.160314		9.99836	77.4632
	5.09361	-0.163534		10.1983	71.4647
	5.19355	-0.164208		10.3983	62.3749
	5.29349	-0.161261		10.5982	51.2571
	5.39342	-0.163524		10.7982	50.9861
	5.49336	-0.14932		10.9981	57.9934
	5.59329	-0.148975		11.1981	47.0503
	5.69323	-0.141057		11.398	31.7501
	5.79317	-0.166581		11.598	22.8338
	5.8931	-0.16093		11.7979	17.3619
	5.99304	-0.162435		11.9979	13.4559
	6.09298	-0.15973		12.1978	10.6577
	6.19291	-0.158014		12.3978	8.79253
	6.29285	-0.173261		12.5977	7.49049
	6.39278	-0.174378		12.7976	6.56795
	6.49272	-0.156018		12.9976	5.86591
	6.59266	-0.16222		13.1975	5.29092
	6.69259	-0.162987		13.3975	4.83067
	6.79253	-0.157833		13.5975	4.43094
	6.89246	-0.168808		13.7974	4.16367
	6.9924	-0.160305		13.9973	3.94925
	7.09234	-0.107581		14.1973	3.75349
	7.19227	-0.079332		14.3972	3.5988
	7.29221	-0.11727		14.5972	3.46425
	7.39215	-0.147892		14.7971	3.31771
	7.49208	-0.139287		14.9971	3.17047
	7.59202	-0.14506		15.197	3.00938
	7.69196	-0.147698		15.397	2.84061
	7.79189	-0.148685		15.5969	2.69331
	7.89183	-0.151282		15.7969	2.54733
	7.99176	-0.162445		15.9968	2.417
	8.0917	-0.169779		16.1968	2.28717
	8.19164	-0.143703		16.3967	2.19599
	8.29157	-0.141032		16.5967	2.15322
	8.39151	-0.163856		16.7966	2.15796
	8.49145	-0.168356		16.9966	2.22793
	8.59138	-0.15899		17.1965	2.36464
	8.69132	-0.158671		17.3965	2.57181
	8.79125	-0.150218		17.5964	2.69941
	8.89119	-0.146913		17.7964	2.71868
	8.99113	-0.148284		17.9963	2.64378
	9.09106	-0.155831		18.1963	2.60479
	9.191	-0.150286		18.3962	2.94004
	9.29093	-0.141362		18.5962	3.60343
	9.39087	-0.146024		18.7961	3.83793
	9.49081	-0.137923		18.9961	4.11128
	9.59074	-0.130921		19.196	4.76136
	9.69068	-0.124172		19.396	5.05084
	9.79062	-0.119723		19.5959	4.50734
	9.89055	-0.090511		19.7959	3.49848
	9.99049	-0.104718		19.9958	2.2253
	10.0904	-0.071354		20.1958	1.1191
	10.1904	-0.055258		20.3957	0.582565
	10.2903	-0.001237		20.5957	0.489325
	10.3902	0.085971		20.7956	0.525435
	10.4902	0.258842		20.9956	-0.031686
	10.5901	0.681525		21.1955	-1.39315
	10.69	3.90209		21.3955	-3.0466
	10.79	24.0626		21.5954	-4.51054
	10.8899	70.7248		21.7954	-5.34347
	10.9899	114.29		21.9953	-5.4256
	11.0898	133.867		22.1953	-4.83911
	11.1897	132.047		22.3952	-4.00867
	11.2897	117.225		22.5952	-3.20179
	11.3896	97.816		22.7951	-2.49538
	11.4895	80.1888		22.9951	-1.847
	11.5895	67.2651		23.195	-1.30405
	11.6894	58.3344		23.395	-0.876001
	11.7893	51.438		23.5949	-0.547132
	11.8893	45.2151		23.7949	-0.271771
	11.9892	39.2899		23.9948	-0.02285
	12.0891	33.6929		24.1948	0.206672
	12.1891	28.5305		24.3947	0.40969
	12.289	23.9415		24.5947	0.580139
	12.389	20.0012		24.7946	0.734911
	12.4889	16.6622		24.9946	0.861773
	12.5888	13.8684		25.1945	0.909846
	12.6888	11.5409		25.3945	0.68463
	12.7887	9.65758		25.5944	0.40871
	12.8886	8.12919		25.7944	0.444188
	12.9886	6.90191		25.9943	0.668266
	13.0885	5.89839		26.1943	0.824312
	13.1884	5.10204		26.3942	0.865944
	13.2884	4.43402		26.5942	0.88742
	13.3883	3.88676		26.7941	0.884803
	13.4883	3.44759		26.9941	0.899242
	13.5882	3.0793		27.194	0.920718
	13.6881	2.76032		27.394	0.958164
	13.7881	2.509		27.5939	1.00892
	13.888	2.29299		27.7939	1.07296
	13.9879	2.10951		27.9938	1.14616
	14.0879	1.93955		28.1938	1.17665
	14.1878	1.80538		28.3937	1.19682
	14.2877	1.67834		28.5937	1.20332
	14.3877	1.56617		28.7936	1.24108
	14.4876	1.48562		28.9936	1.19128
	14.5876	1.39167		29.1935	1.18541
	14.6875	1.32372		29.3935	1.1252
	14.7874	1.24243		29.5934	1.08146
	14.8874	1.17317		29.7934	1.03068
	14.9873	1.13526		29.9933	1.00366
	15.0872	1.088		15.0875	0.919108
	15.1872	1.02321		15.1874	0.962379
	15.2871	0.987267		15.2873	0.962727
	15.387	0.936785		15.3873	1.0126
	15.487	0.896345		15.4872	1.02355
	15.5869	0.851382		15.5872	1.04635
	15.6869	0.821009		15.6871	1.07613
	15.7868	0.771469		15.787	1.09371
	15.8867	0.755719		15.887	1.10547
	15.9867	0.724418		15.9869	1.11842
	16.0866	0.687991		16.0868	1.11202
	16.1865	0.670102		16.1868	1.14202
	16.2865	0.630501		16.2867	1.13924
	16.3864	0.603992		16.3866	1.14791
	16.4863	0.587273		16.4866	1.16652
	16.5863	0.547226		16.5865	1.17102
	16.6862	0.53305		16.6865	1.21552
	16.7862	0.505664		16.7864	1.24707
	16.8861	0.485193		16.8863	1.30599
	16.986	0.465079		16.9863	1.38022
	17.086	0.450252		17.0862	1.47564
	17.1859	0.428411		17.1861	1.6211
	17.2858	0.40841		17.2861	1.80484
	17.3858	0.38722		17.386	1.96658
	17.4857	0.378345		17.486	2.10973
	17.5856	0.362474		17.5859	2.21514
	17.6856	0.372773		17.6858	2.31309
	17.7855	0.368138		17.7858	2.38383
	17.8854	0.381477		17.8857	2.44472
	17.9854	0.371029		17.9856	2.50154
	18.0853	0.348775		18.0856	2.55779
	18.1853	0.343209		18.1855	2.71015
	18.2852	0.326179		18.2854	3.04117
	18.3851	0.349146		18.3854	3.55283
	18.4851	0.355662		18.4853	4.27006
	18.585	0.346302		18.5853	4.99881
	18.6849	0.339288		18.6852	5.62286
	18.7849	0.358634		18.7851	5.98477
	18.8848	0.40987		18.8851	6.16128
	18.9847	0.546499		18.985	6.33905
	19.0847	0.689608		19.0849	6.77519
	19.1846	0.779498		19.1849	7.49827
	19.2846	0.903225		19.2848	8.19531
	19.3845	0.919812		19.3848	8.51581
	19.4844	0.832572		19.4847	8.42024
	19.5844	0.653971		19.5846	8.10584
	19.6843	0.555621		19.6846	7.54337
	19.7842	0.495745		19.7845	6.86554
	19.8842	0.318627		19.8844	6.13637
	19.9841	0.133047		19.9844	5.32555
	20.084	0.046612		20.0843	4.69091
	20.184	0.033899		20.1842	4.13535
	20.2839	0.043573		20.2842	3.58423
	20.3839	0.039456		20.3841	3.11512
	20.4838	0.060277		20.4841	2.75118
	20.5837	0.029963		20.584	2.58486
	20.6837	0.039804		20.6839	2.51551
	20.7836	0.05928		20.7839	2.59443
	20.8835	0.095164		20.8838	2.99391
	20.9835	0.196204		20.9837	4.15629
	21.0834	0.319898		21.0837	6.56015
	21.1833	0.401542		21.1836	10.2859
	21.2833	0.445797		21.2836	14.4633
	21.3832	0.490947		21.3835	17.7867
	21.4832	0.518676		21.4834	19.3388
	21.5831	0.542849		21.5834	19.0762
	21.683	0.561419		21.6833	17.5244
	21.783	0.56127		21.7832	15.4377
	21.8829	0.561024		21.8832	13.4256
	21.9828	0.587641		21.9831	11.6998
	22.0828	0.580409		22.083	10.2686
	22.1827	0.516607		22.183	9.07565
	22.2826	0.425872		22.2829	8.04073
	22.3826	0.364109		22.3829	7.16778
	22.4825	0.293225		22.4828	6.50587
	22.5825	0.27035		22.5827	5.98183
	22.6824	0.261163		22.6827	5.51589
	22.7823	0.245058		22.7826	5.09575
	22.8823	0.22894		22.8825	4.73002
	22.9822	0.224802		22.9825	4.38655
	23.0821	0.202927		23.0824	4.09583
	23.1821	0.199812		23.1823	3.8257
	23.282	0.195848		23.2823	3.59693
	23.3819	0.184076		23.3822	3.36153
	23.4819	0.194575		23.4822	3.14862
	23.5818	0.190375		23.5821	2.93479
	23.6818	0.182116		23.682	2.7523
	23.7817	0.177819		23.782	2.55419
	23.8816	0.176142		23.8819	2.39277
	23.9816	0.180582		23.9818	2.21893
	24.0815	0.20122		24.0818	2.07048
	24.1814	0.213284		24.1817	1.93674
	24.2814	0.226634		24.2817	1.81362
	24.3813	0.254141		24.3816	1.71078
	24.4812	0.304522		24.4815	1.63167
	24.5812	0.366619		24.5815	1.56309
	24.6811	0.400626		24.6814	1.52568
	24.7811	0.43149		24.7813	1.51237
	24.881	0.365331		24.8813	1.61566
	24.9809	0.322059		24.9812	1.81421
	25.0809	0.203565		25.0812	2.09654
	25.1808	0.076734		25.1811	2.36664
	25.2807	-0.048675		25.281	2.4703
	25.3807	-0.143953		25.381	2.38318
	25.4806	-0.160157		25.4809	2.13456
	25.5805	-0.04352		25.5808	1.81869
	25.6805	0.177453		25.6808	1.5464
	25.7804	0.435696		25.7807	1.37099
	25.8803	0.686179		25.8806	1.26054
	25.9803	0.868707		25.9806	1.21046
	26.0802	0.981002		26.0805	1.16506
	26.1802	1.01988		26.1805	1.10176
	26.2801	1.01518		26.2804	1.03737
	26.38	0.965294		26.3803	0.970234
	26.48	0.916027		26.4803	0.907531
	26.5799	0.818064		26.5802	0.82755
	26.6798	0.757532		26.6801	0.750381
	26.7798	0.71176		26.7801	0.692428
	26.8797	0.624637		26.88	0.636983
	26.9796	0.567841		26.9799	0.587448
	27.0796	0.534401		27.0799	0.543232
	27.1795	0.501478		27.1798	0.493979
	27.2795	0.472256		27.2798	0.430571
	27.3794	0.451428		27.3797	0.418867
	27.4793	0.415567		27.4796	0.370874
	27.5793	0.396395		27.5796	0.33888
	27.6792	0.382391		27.6795	0.308114
	27.7791	0.346313		27.7794	0.315531
	27.8791	0.348271		27.8794	0.290074
	27.979	0.34785		27.9793	0.289568
	28.0789	0.331066		28.0793	0.287152
	28.1789	0.302588		28.1792	0.28246
	28.2788	0.292198		28.2791	0.301964
	28.3788	0.269091		28.3791	0.309423
	28.4787	0.267646		28.479	0.332577
	28.5786	0.252876		28.5789	0.338065
	28.6786	0.244827		28.6789	0.316551
	28.7785	0.224377		28.7788	0.353454
	28.8784	0.22718		28.8788	0.378676
	28.9784	0.221918		28.9787	0.370207
	29.0783	0.193629		29.0786	0.382833
	29.1782	0.181064		29.1786	0.395577
	29.2782	0.17902		29.2785	0.377389
	29.3781	0.173438		29.3784	0.369462
	29.4781	0.161225		29.4784	0.376862
	29.578	0.15982		29.5783	0.371643
	29.6779	0.151582		29.6782	0.36318
	29.7779	0.134497		29.7782	0.343029
	29.8778	0.13837		29.8781	0.322772
	29.9777	0.122002		29.9781	0.298719
