# Supplementary material for: The intrinsically disordered cytoplasmic tail of a dendrite branching receptor uses two distinct mechanisms to regulate the actin cytoskeleton
Source: eLife journal article supplement (doi:10.7554/elife.88492), 2023-07-17
Supplement: fig3-figsupp1-data2 [file Figure 3 - figure supplment 1E Source Data .xlsx]

## Sheet: Sheet1
mL	mAU	GB1-FKBP-HPO30			mL	mAU	GB1-FRB-HPO30
-0.007443	-3.6785				-0.007339	-8.12748
1.15811	-6.97736				1.15828	-0.138379
2.32367	-7.26325				2.32389	-0.203948
3.48923	-7.41063				3.4895	-0.213921
4.65478	-7.47707				4.65512	-0.200184
5.82034	-7.52779				5.82073	-0.188208
6.9859	-7.55807				6.98635	-0.170238
8.15145	-7.58082				8.15196	-0.153294
9.31701	-7.62106				9.31758	-0.172431
10.4826	-7.6819				10.4832	-0.207534
11.6481	-7.73287				11.6488	-0.24184
12.8137	-7.78855				12.8144	-0.286756
13.9792	-7.852				13.98	-0.346927
15.1448	-7.91366				15.1457	-0.391939
16.3103	-7.95301				16.3113	-0.460237
17.4759	-8.01839				17.4769	-0.497089
18.6415	-8.04558				18.6425	-0.5451
19.807	-8.08268				19.8081	-0.562667
20.9726	-8.11793				20.9737	-0.596784
22.1381	-8.14944				22.1393	-0.615785
23.3037	-8.16692				23.305	-0.631443
24.4692	-8.18502				24.4706	-0.65018
25.6348	-8.20178				25.6362	-0.676748
26.8004	-8.2078				26.8018	-0.6807
27.9659	-8.22629				27.9674	-0.706719
29.1315	-8.23869				29.133	-0.7067
30.297	-8.2436				30.2986	-0.718086
31.4626	-8.2396				31.4643	-0.730945
32.6281	-8.26913				32.6299	-0.733876
33.7937	-8.26489				33.7955	-0.735961
34.9593	-8.27				34.9611	-0.756032
36.1248	-8.28046				36.1267	-0.773582
37.2904	-8.29158				37.2923	-0.772334
38.4559	-8.28968				38.4579	-0.778658
39.6215	-8.28681				39.6236	-0.792621
40.787	-8.3049				40.7892	-0.789701
41.9526	-8.29977				41.9548	-0.788338
43.1181	-8.28253				43.1204	-0.788696
44.2837	-8.29546				44.286	-0.797157
45.4493	-8.29891				45.4516	-0.772488
46.6148	-8.31069				46.6172	-0.79015
47.7804	-8.30676				47.7829	-0.779972
48.9459	-8.3077				48.9485	-0.783351
50.1115	-8.30518				50.1141	-0.786992
51.277	-8.29909				51.2797	-0.775725
52.4426	-8.30832				52.4453	-0.774036
53.6082	-8.30567				53.6109	-0.784922
54.7737	-8.31278				54.7765	-0.798954
55.9393	-8.30186				55.9422	-0.797889
57.1048	-8.31304				57.1078	-0.818119
58.2704	-8.32508				58.2734	-0.821765
59.4359	-8.34035				59.439	-0.827488
60.6015	-8.3409				60.6046	-0.824407
61.767	-8.33364				61.7702	-0.836194
62.9326	-8.35002				62.9358	-0.848552
64.0982	-8.35612				64.1015	-0.846518
65.2637	-8.35919				65.2671	-0.840416
66.4293	-8.36437				66.4327	-0.848757
67.5948	-8.36405				67.5983	-0.869728
68.7604	-8.36279				68.7639	-0.868093
69.9259	-8.36386				69.9295	-0.870033
71.0915	-8.37036				71.0951	-0.882664
72.2571	-8.37502				72.2608	-0.888461
73.4226	-8.37633				73.4264	-0.878865
74.5882	-8.38984				74.592	-0.884092
75.7537	-8.39405				75.7576	-0.887864
76.9193	-8.38776				76.9232	-0.884941
78.0848	-8.3849				78.0888	-0.901634
79.2504	-8.38691				79.2544	-0.903782
80.4159	-8.37123				80.4201	-0.903833
81.5815	-8.38288				81.5857	-0.924654
82.7471	-8.37844				82.7513	-0.93016
83.9126	-8.39127				83.9169	-0.938228
85.0782	-8.36983				85.0825	-0.933671
86.2437	-8.38758				86.2481	-0.93827
87.4093	-8.37814				87.4137	-0.943958
88.5748	-8.38625				88.5794	-0.950295
89.7404	-8.36359				89.745	-0.954192
90.906	-8.37305				90.9106	-0.966352
92.0715	-8.3715				92.0762	-0.972007
93.2371	-8.36677				93.2418	-0.974941
94.4026	-8.34961				94.4074	-0.98508
95.5682	-8.29265				95.5731	-0.986423
96.7337	-8.22064				96.7387	-0.979913
97.8993	-8.19321				97.9043	-0.981807
99.0649	-8.21265				99.0699	-0.978499
100.23	-8.27813				100.236	-0.984942
101.396	-8.34087				101.401	-1.00753
102.562	-8.35519				102.567	-1.00202
103.727	-8.37108				103.732	-0.978136
104.893	-8.38752				104.898	-0.919715
106.058	-8.38746				106.064	-0.87962
107.224	-8.40818				107.229	-0.891138
108.389	-8.41676				108.395	-0.889649
109.555	-8.42029				109.56	-0.921656
110.72	-8.43079				110.726	-0.954739
111.886	-8.40813				111.892	-0.968518
113.052	-8.42023				113.057	-0.991013
114.217	-8.41425				114.223	-0.981833
115.383	-8.41057				115.389	-0.986375
116.548	-8.39736				116.554	-0.974551
117.714	-8.41273				117.72	-0.959025
118.879	-8.39592				118.885	-0.971272
120.045	-8.39655				120.051	-0.958244
121.21	-8.40326				121.217	-0.950015
122.376	-8.39196				122.382	-0.936647
123.542	-8.36802				123.548	-0.926205
124.707	-8.38082				124.713	-0.907797
125.873	-8.36419				125.879	-0.879411
127.038	-8.34682				127.045	-0.879506
128.204	-8.32582				128.21	-0.863792
129.369	-8.33444				129.376	-0.861903
130.535	-8.32048				130.541	-0.849965
131.7	-8.30896				131.707	-0.840918
132.866	-8.3029				132.873	-0.827093
134.032	-8.27681				134.038	-0.818446
135.197	-8.26542				135.204	-0.792051
136.363	-8.24235				136.37	-0.800351
137.528	-8.19682				137.535	-0.811014
138.694	-8.14655				138.701	-0.801683
139.859	-8.08621				139.866	-0.811242
141.025	-8.01937				141.032	-0.830796
142.19	-7.95246				142.198	-0.850884
143.356	-7.87029				143.363	-0.873537
144.522	-7.77126				144.529	-0.882751
145.687	-7.71313				145.694	-0.887796
146.853	-7.62325				146.86	-0.877795
148.018	-7.53144				148.026	-0.873101
149.184	-7.39076				149.191	-0.84761
150.349	-7.21935				150.357	-0.787382
151.515	-7.00633				151.523	-0.707426
152.68	-6.75506				152.688	-0.603954
153.846	-6.42958				153.854	-0.454473
155.012	-6.00497				155.019	-0.197756
156.177	-5.37992				156.185	0.279856
157.343	-4.1913				157.351	1.4788
158.508	-1.1848				158.516	5.4058
159.674	7.26349				159.682	18.6669
160.839	28.5549				160.847	54.6992
162.005	71.7621				162.013	125.971
163.17	140.783				163.179	226.066
164.336	227.087				164.344	327.731
165.502	309.036				165.51	401.665
166.667	364.635				166.676	435.341
167.833	385.491				167.841	434.901
168.998	376.885				169.007	412.444
170.164	348.921				170.172	377.756
171.329	310.344				171.338	337.116
172.495	267.229				172.504	294.366
173.66	223.572				173.669	252.215
174.826	181.996				174.835	212.295
175.992	144.281				176	175.77
177.157	111.565				177.166	143.593
178.323	84.2499				178.332	116.176
179.488	62.486				179.497	93.6059
180.654	45.8076				180.663	75.5996
181.819	33.5156				181.829	61.6269
182.985	24.7622				182.994	51.0505
184.15	18.6256				184.16	43.1498
185.316	14.3712				185.325	37.3462
186.482	11.3652				186.491	32.938
187.647	9.22101				187.657	29.5572
188.813	7.63831				188.822	26.892
189.978	6.42761				189.988	24.7453
191.144	5.48652				191.153	22.9676
192.309	4.71809				192.319	21.4827
193.475	4.09145				193.485	20.2048
194.64	3.55997				194.65	19.0954
195.806	3.09208				195.816	18.1064
196.972	2.68277				196.982	17.2297
198.137	2.31984				198.147	16.4623
199.303	1.97989				199.313	15.7505
200.468	1.67917				200.478	15.0942
201.634	1.40789				201.644	14.5099
202.799	1.11733				202.81	13.9709
203.965	0.850077				203.975	13.4614
205.13	0.608138				205.141	12.9972
206.296	0.340789				206.306	12.5696
207.462	0.089197				207.472	12.1557
208.627	-0.180874				208.638	11.7764
209.793	-0.431446				209.803	11.4122
210.958	-0.677464				210.969	11.073
212.124	-0.911996				212.135	10.7472
213.289	-1.1108				213.3	10.4482
214.455	-1.3199				214.466	10.1609
215.62	-1.50754				215.631	9.89143
216.786	-1.67753				216.797	9.63131
217.952	-1.84555				217.963	9.38698
219.117	-1.9948				219.128	9.15174
220.283	-2.09381				220.294	8.99114
221.448	-2.29005				221.459	8.69403
222.614	-2.41208				222.625	8.48688
223.779	-2.54754				223.791	8.28137
224.945	-2.65584				224.956	8.07377
226.111	-2.71364				226.122	7.87986
227.276	-2.88096				227.288	7.68824
228.442	-2.98682				228.453	7.53415
229.607	-3.07577				229.619	7.38149
230.773	-3.18534				230.784	7.23112
231.938	-3.28658				231.95	7.07623
233.104	-3.39713				233.116	6.94684
234.269	-3.50492				234.281	6.80866
235.435	-3.59024				235.447	6.68548
236.601	-3.70649				236.612	6.55038
237.766	-3.80539				237.778	6.43796
238.932	-3.89324				238.944	6.32209
240.097	-3.9764				240.109	6.20773
241.263	-4.06957				241.275	6.09663
242.428	-4.1413				242.44	5.99617
243.594	-4.21438				243.606	5.89127
244.759	-4.28488				244.772	5.79761
245.925	-4.35385				245.937	5.71094
247.091	-4.41747				247.103	5.61472
248.256	-4.48065				248.269	5.52263
249.422	-4.52609				249.434	5.44094
250.587	-4.59757				250.6	5.36871
251.753	-4.65176				251.765	5.29395
252.918	-4.71085				252.931	5.21509
254.084	-4.75826				254.097	5.1495
255.249	-4.81531				255.262	5.07752
256.415	-4.86172				256.428	5.00362
257.581	-4.90195				257.594	4.94154
258.746	-4.92977				258.759	4.87164
259.912	-4.97644				259.925	4.80897
261.077	-5.00495				261.09	4.72335
262.243	-5.04272				262.256	4.66628
263.408	-5.06281				263.422	4.62444
264.574	-5.04418				264.587	4.61937
265.739	-4.99387				265.753	4.62881
266.905	-4.81969				266.918	4.81021
268.071	-4.45338				268.084	5.24047
269.236	-4.34257				269.25	5.2427
270.402	-4.37421				270.415	5.2896
271.567	-4.21335				271.581	5.30839
272.733	-3.89518				272.746	5.32459
273.898	-3.69051				273.912	5.44116
275.064	-3.87763				275.078	5.33328
276.229	-4.05453				276.243	5.32583
277.395	-4.00325				277.409	5.35912
278.561	-3.86234				278.575	5.03918
279.726	-4.06226				279.74	4.81062
280.892	-4.65455				280.906	4.77604
282.057	-5.34119				282.071	4.57045
283.223	-5.682				283.237	4.38801
284.388	-5.74129				284.403	4.38123
285.554	-5.61757				285.568	4.31305
286.719	-5.34312				286.734	4.19982
287.885	-5.24134				287.899	4.01713
289.051	-5.40754				289.065	3.7756
290.216	-5.67084				290.231	3.51572
291.382	-6.02667				291.396	3.17384
292.547	-6.52782				292.562	2.69812
293.713	-7.25308				293.728	2.08459
294.878	-8.08097				294.893	1.36124
296.044	-8.87869				296.059	0.585513
297.209	-9.55665				297.224	-0.180445
298.375	-10.0364				298.39	-0.621936
299.541	-10.0345				299.556	-0.58778
300.706	-9.62314				300.721	-0.21329
301.872	-9.08439				301.887	0.334592
303.037	-8.4939				303.052	0.934106
304.203	-7.90563				304.218	1.55478
305.368	-7.32255				305.384	2.16737
306.534	-6.77441				306.549	2.75518
307.699	-6.27571				307.715	3.28703
308.865	-5.80397				308.881	3.76402
310.031	-5.44933				310.046	4.201
311.196	-5.21659				311.212	4.50264
312.362	-5.22769				312.377	4.60487
313.527	-5.82226				313.543	4.12817
314.693	-6.01426				314.709	3.81415
315.858	-6.10439				315.874	3.66519
317.024	-6.03423				317.04	3.67774
318.189	-5.93444				318.205	3.73301
319.355	-5.88017				319.371	3.73379
320.521	-5.92606				320.537	3.647
321.686	-6.07046				321.702	3.44448
322.852	-6.30453				322.868	3.17635
324.017	-6.60164				324.034	2.87122
325.183	-6.86243				325.199	2.62209
326.348	-7.08265				326.365	2.43529
327.514	-7.23968				327.53	2.30586
328.679	-7.32205				328.696	2.2234
329.845	-7.37747				329.862	2.18327
331.011	-7.41215				331.027	2.17595
332.176	-7.40502				332.193	2.1701
333.342	-7.40028				333.358	2.1668
334.507	-7.38997				334.524	2.17162
335.673	-7.38228				335.69	2.15191
336.838	-7.37381				336.855	2.13042
338.004	-7.35715				338.021	2.10218
339.169	-7.38831				339.187	2.07335
340.335	-7.40172				340.352	1.99413
341.501	-7.45558				341.518	1.9304
342.666	-7.55063				342.683	1.83901
343.832	-7.65487				343.849	1.75951
344.997	-7.74352				345.015	1.6854
346.163	-7.86078				346.18	1.62328
347.328	-7.96618				347.346	1.57039
348.494	-8.04918				348.511	1.52391
349.659	-8.1111				349.677	1.51751
