# Supplementary material for: The intrinsically disordered cytoplasmic tail of a dendrite branching receptor uses two distinct mechanisms to regulate the actin cytoskeleton
Source: eLife journal article supplement (doi:10.7554/elife.88492), 2023-07-17
Supplement: fig4-data2 [file Figure 4C Source Data.xlsx]

## Sheet: Quantification
	GST Intensity	MBP-HPO30 Int	Ratio	Corrected Ratio	Ratio to WT
GST #1	30354.4	1026.06	0.0338027
GST #2	29922	1088.6	0.0363812
GST #3	30961.4	798.113	0.0257777
GST-HPO30 WT #1	27521.1	13829.6	0.502507	0.468705	1
GST-HPO30 WT #2	28639.7	12825	0.447805	0.411424	1
GST-HPO30 WT #3	26986.2	12874.3	0.47707	0.451292	1
GST-HPO30 Ala#1 #1	23837.1	2156.2	0.0904557	0.056653	0.120871
GST-HPO30 Ala#1 #2	22765.1	1486.89	0.0653144	0.0289332	0.0703245
GST-HPO30 Ala#1 #3	22700.7	2046.96	0.0901717	0.064394	0.142688
GST-HPO30 Ala#2 #1	28861.5	5256.93	0.182144	0.148341	0.316492
GST-HPO30 Ala#2 #2	28378	5038.47	0.177549	0.141167	0.343119
GST-HPO30 Ala#2 #3	30618.4	5494.18	0.17944	0.153663	0.340495
GST-HPO30 Ala#3 #1	32979.2	9696.49	0.294019	0.260216	0.555181
GST-HPO30 Ala#3 #2	29001.9	13115	0.452213	0.415832	1.01071
GST-HPO30 Ala#3 #3	28329.5	11302.7	0.398974	0.373197	0.826951
GST-HPO30 Ala#4 #1	34000.2	9200.12	0.27059	0.236788	0.505196
GST-HPO30 Ala#4 #2	27875.3	11085.1	0.397669	0.361288	0.87814
GST-HPO30 Ala#4 #3	28098.9	10181.3	0.362339	0.336561	0.745773
GST-HPO30 Ala#5 #1	33433	3032.98	0.0907182	0.0569155	0.121431
GST-HPO30 Ala#5 #2	27104.3	3342.28	0.123311	0.0869302	0.211291
GST-HPO30 Ala#5 #3	26552	4006.81	0.150904	0.125126	0.277263
GST-HPO30 Ala#6 #1	40008	7053.95	0.176314	0.142511	0.304053
GST-HPO30 Ala#6 #2	27777.7	4256.35	0.153229	0.116848	0.284008
GST-HPO30 Ala#6 #3	29005.2	4264.64	0.14703	0.121252	0.268678
GST-HPO30 Ala#7 #1	29839.3	3880.4	0.130043	0.0962405	0.205333
GST-HPO30 Ala#7 #2	32379.6	4333.28	0.133827	0.097446	0.247996
GST-HPO30 Ala#7 #3	32999.2	4855.86	0.147151	0.121373	0.268946
HPO30 Ala#8-GST #1	39516	11404.7	0.28861	0.254808	0.893501
HPO30 Ala#8-GST #2	36102.6	15038.6	0.41655	0.380169	0.967515
HPO30 Ala#8-GST #3	35507.1	13072.4	0.368164	0.342386	0.850829
HPO30 Ala#9-GST #1	42648	7053.95	0.165399	0.131597	0.461453
HPO30 Ala#9-GST #2	36744.2	8313.17	0.226244	0.189863	0.483194
HPO30 Ala#9-GST #3	37896.9	9046.3	0.238708	0.21293	0.529131
HPO30 Ala#10-GST #1	40148.4	16118.5	0.401472	0.36767	1.28926
HPO30 Ala#10-GST #2	34921.6	15328.3	0.438933	0.402552	1.02448
HPO30 Ala#10-GST #3	35667	16845	0.472285	0.446507	1.10957
HPO30 WT-GST #1	24728.8	7888.02	0.318981	0.285179	1
HPO30 WT-GST #2	23172.6	9888.59	0.426736	0.392934	1
HPO30 WT-GST #3	22480.2	9806.25	0.436218	0.402415	1

## Sheet: Statistics
GST-WT	A	1
GST-WT	A	1
GST-WT	A	1
Ala #1	B	0.120871
Ala #1	B	0.0703245
Ala #1	B	0.142688
Ala #2	C	0.316492							p
Ala #2	C	0.343119			B-A	-0.888705	-1.18347	-0.593939	0	***
Ala #2	C	0.340495			C-A	-0.666632	-0.961398	-0.371865	1.3e-06	***
Ala #3	D	0.555181			D-A	-0.202385	-0.497151	0.0923813	0.398477	n.s.	3 and 4 not significant from WT
Ala #3	D	1.01071			E-A	-0.290297	-0.585063	0.00446934	0.0562153	n.s.
Ala #3	D	0.826951			F-A	-0.796672	-1.09144	-0.501905	0	***
Ala #4	E	0.505196			G-A	-0.71442	-1.00919	-0.419654	4e-07	***
Ala #4	E	0.87814			H-A	-0.759242	-1.05401	-0.464475	1e-07	***
Ala #4	E	0.745773			I-A	-0.0960519	-0.390818	0.198715	0.986209	n.s.
Ala #5	F	0.121431			J-A	-0.508741	-0.803507	-0.213974	0.0001038	***	8 and 10 not signficant from WT
Ala #5	F	0.211291			K-A	0.141103	-0.153664	0.435869	0.839546	n.s.
Ala #5	F	0.277263			L-A	-1.11022e-15	-0.294766	0.294766	1
Ala #6	G	0.304053			C-B	0.222074	-0.0726926	0.51684	0.276429
Ala #6	G	0.284008			D-B	0.68632	0.391554	0.981087	8e-07
Ala #6	G	0.268678			E-B	0.598408	0.303642	0.893175	8.1e-06
Ala #7	H	0.205333			F-B	0.0920337	-0.202733	0.3868	0.990073	n.s.
Ala #7	H	0.247996			G-B	0.174285	-0.120481	0.469051	0.607377
Ala #7	H	0.268946			H-B	0.129464	-0.165303	0.42423	0.898913
Ala #8	I	0.893501			I-B	0.792654	0.497887	1.08742	1e-07
Ala #8	I	0.967515			J-B	0.379965	0.0851984	0.674731	0.0045726
Ala #8	I	0.850829			K-B	1.02981	0.735042	1.32457	0
Ala #9	J	0.461453			L-B	0.888705	0.593939	1.18347	0
Ala #9	J	0.483194			D-C	0.464246	0.16948	0.759013	0.0003819
Ala #9	J	0.529131			E-C	0.376334	0.081568	0.671101	0.0050833
ala #10	K	1.28926			F-C	-0.13004	-0.424807	0.164726	0.896337
ala #10	K	1.02448			G-C	-0.0477888	-0.342555	0.246978	0.999974
ala #10	K	1.10957			H-C	-0.09261	-0.387376	0.202156	0.989578
WT-GST	L	1			I-C	0.57058	0.275813	0.865346	1.77e-05
WT-GST	L	1			J-C	0.157891	-0.136875	0.452657	0.730311
WT-GST	L	1			K-C	0.807734	0.512968	1.1025	0
					L-C	0.666632	0.371865	0.961398	1.3e-06
					E-D	-0.087912	-0.382678	0.206854	0.993094
					F-D	-0.594287	-0.889053	-0.29952	9.1e-06
					G-D	-0.512035	-0.806802	-0.217269	9.44e-05
					H-D	-0.556856	-0.851623	-0.26209	2.6e-05
					I-D	0.106333	-0.188433	0.4011	0.971059
					J-D	-0.306356	-0.601122	-0.0115891	0.0367079
					K-D	0.343488	0.0487212	0.638254	0.0130967
					L-D	0.202385	-0.0923813	0.497151	0.398477
					F-E	-0.506375	-0.801141	-0.211608	0.0001112
					G-E	-0.424123	-0.71889	-0.129357	0.001248
					H-E	-0.468944	-0.763711	-0.174178	0.0003326
					I-E	0.194245	-0.100521	0.489012	0.456084
					J-E	-0.218444	-0.51321	0.0763229	0.296867
					K-E	0.4314	0.136633	0.726166	0.0010066
					L-E	0.290297	-0.00446934	0.585063	0.0562153
					G-F	0.0822514	-0.212515	0.377018	0.995996
					H-F	0.0374302	-0.257336	0.332197	0.999998
					I-F	0.70062	0.405853	0.995386	5e-07
					J-F	0.287931	-0.00683527	0.582698	0.0597831
					K-F	0.937774	0.643008	1.23254	0
					L-F	0.796672	0.501905	1.09144	0
					H-G	-0.0448212	-0.339588	0.249945	0.999986
					I-G	0.618368	0.323602	0.913135	4.7e-06
					J-G	0.20568	-0.0890866	0.500446	0.376228
					K-G	0.855523	0.560756	1.15029	0
					L-G	0.71442	0.419654	1.00919	4e-07
					I-H	0.66319	0.368423	0.957956	1.4e-06
					J-H	0.250501	-0.0442655	0.545267	0.149969
					K-H	0.900344	0.605578	1.19511	0
					L-H	0.759242	0.464475	1.05401	1e-07
					J-I	-0.412689	-0.707455	-0.117922	0.0017489
					K-I	0.237154	-0.057612	0.531921	0.20206
					L-I	0.0960519	-0.198715	0.390818	0.986209
					K-J	0.649843	0.355077	0.94461	2e-06
					L-J	0.508741	0.213974	0.803507	0.0001038
					L-K	-0.141103	-0.435869	0.153664	0.839546
