# Supplementary material for: The intrinsically disordered cytoplasmic tail of a dendrite branching receptor uses two distinct mechanisms to regulate the actin cytoskeleton
Source: eLife journal article supplement (doi:10.7554/elife.88492), 2023-07-17
Supplement: fig4-figsupp2-data2 [file Figure 4 - figure supplement 2A source data.xlsx]

## Sheet: BSA Raw Data 
	1uM	5uM	10uM	20uM	35uM	50uM
nm	RFU	RFU	RFU	RFU	RFU	RFU
320	9023	44177	88610	167303	262919	340836
321	9441	47438	93934	176551	278872	360463
322	10158	50101	99282	186990	293133	378937
323	10726	52740	105016	196629	307735	397537
324	11419	55357	109385	205982	320957	414780			concentration (uM)	1uM	5uM	10uM	20uM	35uM	50uM
325	11869	58237	115086	215286	337284	433973			Fluorescence at 348nm	18689	91596	177644	323316	492414	626198
326	12555	60218	120759	225882	350209	452483
327	12879	63882	125916	233632	364351	468521
328	13639	66315	130228	242607	376869	484678			conc	normalized fluorescence (RFU/conc)
329	13956	69057	135580	252561	389922	500786			1	18689
330	14539	70537	139915	261336	401544	516260			5	18319.2
331	15021	73099	144145	267691	412874	529818			10	17764.4
332	15540	75545	148654	275119	425891	542829			20	16165.8
333	16038	77625	152381	282130	434790	555774			35	14069
334	16166	79415	155464	287597	443614	568503			50	12524
335	16710	81612	159438	292691	451453	577601
336	16812	82613	162409	297943	459561	587677
337	17334	84202	165502	303624	467006	594306
338	17723	85167	167086	307378	472439	603198
339	17801	86332	169388	312242	478029	608611
340	18397	87859	172052	313728	481579	616065
341	18047	88019	172924	316564	486515	617845
342	18357	88936	173854	318941	487745	621121
343	18170	90430	175497	321288	489553	622157
344	18634	89866	175805	321298	490102	624567
345	18797	90789	176521	323101	492741	628158
346	18812	90695	177130	323411	493216	626568
347	18596	90307	177046	325065	494047	624770
348	18689	91596	177644	323316	492414	626198
349	18635	91225	177902	322593	491982	624301
350	18900	90393	177502	321898	490516	623760
351	18884	90549	176500	320872	488014	619646
352	18710	89922	175407	319481	486429	614956
353	18694	89660	174803	317017	482562	612263
354	18581	89178	173699	315276	478797	605929
355	18281	88626	172008	311435	474388	598818
356	18421	86784	169964	309714	467780	592455
357	18109	86653	169034	305305	462676	585037
358	17947	85449	165971	301579	456280	577903
359	17559	84360	164064	296979	449990	568656
360	17431	83538	161581	293215	442803	559311
361	16989	81681	159189	288299	435439	550469
362	16451	80371	155927	282871	426682	541000
363	16688	78708	153613	278123	417764	529947
364	16227	77556	150020	271887	410711	518352
365	15752	76197	147481	266755	403554	510550
366	15413	75298	144475	262212	393870	497687
367	15102	73060	141624	255878	384783	486285
368	14771	71478	137890	249898	377168	475415
369	14208	69967	135128	243234	366977	463585
370	14030	67755	131493	237590	358504	451345
371	13784	66519	128167	231085	348437	440719
372	13570	64458	125045	225502	339440	429255
373	13323	63372	122260	219403	330711	417674
374	12897	61224	118379	213704	320691	406521
375	12338	59585	115068	208927	312644	394885
376	12099	58081	111647	201257	304068	381449
377	11935	55737	108620	195388	294606	370336
378	11403	54615	105157	189221	284615	359132
379	11292	53194	102013	184251	276626	348169
380	10538	51216	99500	178075	268025	337595
381	10540	49896	96402	173271	260656	327351
382	10330	48560	93787	168238	251939	317825
383	9794	46777	90750	162500	244999	308770
384	9564	45084	87939	158814	237522	298378
385	9258	43842	85141	152876	228986	288951
386	9112	42495	82019	147773	221883	279624
387	8979	41072	79518	143118	213962	269398
388	8487	39724	76424	137288	206014	260403
389	7891	38245	73214	132184	197912	249494
390	7830	36612	71038	127595	190545	240373
391	7355	35256	67827	123048	183878	231401
392	7453	34221	65248	117680	176041	221739
393	6810	32869	62872	113169	168917	212729
394	6836	31465	60812	108912	163665	204848
395	6513	30187	58191	104385	156343	196990
396	6337	29158	55834	100594	150332	188247
397	5931	28218	54249	96708	144827	181842
398	5751	26895	51652	93126	139349	175790
399	5504	25705	49871	89329	133073	167638
400	5326	24732	47598	86095	128260	161616

## Sheet: Trp Raw Data
	1uM	2uM	5uM	10uM	15uM	20uM	30uM	50uM
nm	RFU	RFU	RFU	RFU	RFU	RFU	RFU	RFU
320	5347	9896	28032	45040	78243	91064	133237	214757
321	5680	10644	30150	48966	86891	100633	146949	236895
322	6185	11818	33197	53805	94265	108882	160593	258755
323	6645	12873	36223	59168	102897	119239	175586	282944
324	7172	13725	39060	63462	111093	129580	190187	305313
325	7526	14924	42630	69280	120428	140520	205138	331100				concentration (uM)	1uM	2uM	5uM	10uM	15uM	20uM	30uM	50uM
326	8166	16077	45671	74523	129016	150145	222383	355837				Fluorescence at 359nm	19450	39547	111691	185857	324990	377962	554387	891277
327	8789	16847	48616	79513	138441	160975	235930	379605
328	9135	18227	51723	84534	147368	171639	253082	405710				conc	normalized fluorescence (RFU/conc)
329	9808	19227	55116	90243	157247	182893	267301	432277				1	19450
330	10533	20622	58394	95530	166454	194142	283534	457578				2	19773.5
331	11009	21453	61682	100882	175712	205195	300901	483560				5	22338.2
332	11468	22377	64593	105928	183610	214821	316593	510144				10	18585.7
333	11734	23752	67851	110724	194172	226240	331274	534598				15	21666
334	12502	24417	71039	116095	202746	236125	346761	560035				20	18898.1
335	12770	25879	73157	121565	211721	246092	361167	582486				30	18479.6
336	13768	27166	77221	126357	220250	256899	376358	606320				50	17825.5
337	13782	27389	79663	130232	228509	266417	389804	629912
338	14233	28520	81495	135215	236928	276088	403959	651804
339	14748	29118	85011	139592	243869	284456	418593	673592
340	15167	30640	87124	143908	251963	293328	430815	691461
341	15752	31290	90462	148259	258903	301809	441255	711426
342	16000	32047	92186	151690	265084	308804	452845	730327
343	16445	32642	94144	155430	271290	317206	465193	745693
344	16690	33482	96215	157576	276990	323308	475142	763274
345	16686	33905	97976	162123	282852	330403	483181	777312
346	17262	34720	100490	164534	289006	335847	491820	791336
347	17555	35079	101505	168479	293304	342981	501532	807754
348	17730	35445	103476	170211	298071	347669	510626	819777
349	18256	36533	104584	173204	303342	353603	517514	830018
350	18393	37179	105531	175860	307003	357695	524308	842992
351	18541	36979	107661	177968	310645	362578	531041	852719
352	18732	37891	108767	179347	313211	366893	536729	859696
353	18667	38437	110248	181563	315728	369742	542059	870436
354	19043	38258	111494	182733	320905	373368	544643	875567
355	18840	38216	111207	183882	321057	375616	548770	880409
356	19213	38339	112115	184993	323531	375928	552495	885200
357	19313	38558	112266	186072	323306	377475	552386	888443
358	19163	39359	111828	185866	324424	378221	554719	889066
359	19450	39547	111691	185857	324990	377962	554387	891277
360	19603	38609	112246	185301	324498	377251	554616	888890
361	19070	38264	112185	185521	323263	376799	553505	886263
362	18817	38016	111870	183465	321549	375191	549409	881943
363	19261	38614	112056	182986	321084	373864	547828	880646
364	18698	38109	110242	182618	319746	371188	544907	875191
365	18955	38151	109590	181612	317420	368340	541700	868146
366	18964	37749	108559	179785	313861	366042	537689	863441
367	18038	37181	108029	177974	311682	363056	532216	854538
368	18296	37069	106646	176720	308708	359460	527714	848079
369	18417	36773	105936	174589	304773	355487	519490	835789
370	17777	36224	104915	172212	301624	351184	514945	827079
371	17956	35403	103282	169740	298212	346125	508872	815564
372	17408	35034	101697	167586	292819	341339	502369	805281
373	17159	34907	100389	165226	289683	335263	492904	792436
374	17051	34077	98942	162658	283878	332217	486652	780568
375	16468	33719	96542	159831	279511	325880	477846	767268
376	16417	33144	95516	156946	275320	320294	468437	753640
377	16365	32966	94356	153986	269767	315028	461070	741421
378	15634	31419	92088	150950	265007	308053	452229	728232
379	15562	31579	90385	148870	260465	301760	444221	714686
380	14903	30355	88561	145668	255637	296783	434804	701888
381	15040	30047	87203	142727	249651	290832	427311	687294
382	14540	29450	84722	140743	245276	286446	419308	673634
383	14298	29022	83641	137227	240503	279795	410373	659795
384	14287	28523	82463	134230	235547	274194	402013	647685
385	13704	27813	80164	131786	229226	267035	391617	631881
386	13506	27021	77831	128040	224759	261378	383130	616668
387	13193	26561	76063	125447	218735	255451	372130	601496
388	12886	25788	74019	121886	212706	247658	362578	584571
389	12574	24950	72683	117607	206423	239475	351879	567388
390	12155	24632	70499	114569	201959	232900	342533	554008
391	11663	23383	68166	111051	194368	226524	332911	535127
392	11187	23166	66025	108748	189158	220683	322618	521617
393	10664	22108	64044	105941	183010	212877	312754	504823
394	10851	21738	62254	102117	177951	206907	303850	490410
395	10874	21137	60252	98129	172982	200744	294583	475210
396	9955	20088	58057	95363	167261	194628	284402	459650
397	9733	19295	56490	92632	162142	188918	276305	444761
398	9526	18728	55015	89784	156321	181565	267092	431013
399	9339	18242	52819	87112	152037	176909	259143	417379
400	8934	17837	51340	83749	147944	170879	250785	405188

## Sheet: ICD Raw Data
	1uM	2uM	5uM	10uM	15uM	20uM	30uM	40uM	50uM
nm	RFU	RFU	RFU	RFU	RFU	RFU	RFU	RFU	RFU
320	249	4794	13917	30424	47396	65570	97359	133916	188252
321	716	5271	15284	32804	51972	71820	105772	146611	205336
322	892	5551	16694	35668	56769	77832	114197	158953	223518
323	1141	6177	18156	38405	61211	84335	124119	172168	241784
324	735	6577	19320	41053	66141	90340	133433	185797	259827
325	1037	6828	20769	44490	71271	96884	144234	199666	279699
326	1248	7368	22048	47238	76336	104327	154436	213451	299077
327	1335	7732	23688	50202	80843	111083	164584	228025	318579
328	1549	8333	25153	53394	85667	116672	173583	241672	337532
329	1592	8728	26392	56595	90994	125118	184172	255133	358178
330	1602	9141	28108	59654	96071	131587	195296	269221	376899		concentration (uM)	1uM	2uM	5uM	10uM	15uM	20uM	30uM	40uM	50uM
331	1708	9879	29646	62884	101355	138048	204649	284131	397060		Fluorescence at 356nm	3422	16891	49524	106104	172338	234038	346380	482162	672605
332	1716	10599	30829	65770	106372	145516	214477	298104	416553
333	2324	10476	32542	68893	110625	151785	224191	310877	434711		conc	normalized fluorescence (RFU/conc)
334	2312	11826	33697	71792	116151	158024	233466	323972	454124		1	3422
335	2274	11611	35355	74764	119544	163599	242580	337532	472102		2	8445.5
336	2454	12122	36107	77710	124521	169447	251904	350016	488852		5	9904.8
337	2619	12662	37294	80110	128754	176400	258934	360535	504570		10	10610.4
338	2787	12862	38348	83038	132551	181740	267827	372287	521509		15	11489.2
339	2800	13317	39599	85178	137055	185259	276851	383099	537883		20	11701.9
340	2743	13800	41275	87327	140667	190596	284385	393133	550514		30	11546
341	2705	14092	42239	89303	143806	196380	290018	403937	562678		40	12054
342	3147	14168	42517	91675	147712	199820	297160	413562	575432		50	13452.1
343	2894	14490	44012	93449	149931	204431	303025	419566	590498
344	3009	14812	44045	95295	153416	208631	307729	429677	600428
345	2901	14970	45089	96266	156384	211894	314103	438266	609347
346	3394	15467	45687	98434	158520	215710	318714	443127	619496
347	3164	15845	46399	99255	160119	218394	323692	450569	629706
348	3280	15670	47315	101162	162059	221004	327355	457028	638522
349	3094	16126	47693	101627	164787	223933	332070	460308	644261
350	3086	16620	48202	103247	166649	225956	335038	466522	652359
351	3208	16568	49049	104161	168076	227785	338735	471372	655771
352	3113	16287	49098	104483	169558	230680	341741	474806	661768
353	3622	16499	49572	105166	169450	230428	343695	477360	666079
354	3182	16699	49690	106369	170861	233010	345284	478011	670764
355	3230	16798	49546	106491	171645	232590	345763	480199	671455
356	3422	16891	49524	106104	172338	234038	346380	482162	672605
357	3477	16759	49747	106291	172003	232940	346806	480702	672001
358	3362	16837	50504	106453	171307	233211	345930	479405	672396
359	3563	16631	49564	106500	171687	232792	345259	479301	671420
360	3289	16679	50172	105835	170547	232763	344228	476645	668491
361	3365	16650	48554	105825	168935	231012	342772	475126	663887
362	3570	16744	49048	104933	168034	228805	339573	471185	659450
363	3135	16515	47900	103980	166839	227195	337365	468682	656283
364	3608	16410	48129	102402	165746	224808	334232	464763	650130
365	3497	16393	47635	102099	163604	223440	331225	461266	642819
366	3457	15888	47424	99701	161927	220854	326759	454497	634587
367	3298	15815	46473	99423	160642	217802	323787	448745	629789
368	3205	15275	45797	98597	158568	214780	319149	445443	620173
369	2795	15388	45747	97054	155106	211361	314964	437108	612999
370	2803	14609	44822	95449	153738	209691	308112	430949	602819
371	2989	14276	43755	94097	150385	205739	304741	422166	594530
372	2900	14425	43233	92820	148091	201833	299157	415868	584045
373	2697	14199	42034	90668	145321	198831	294901	409376	572687
374	2626	13924	41560	88718	142179	195266	289514	401916	562825
375	2711	13576	40816	87322	140330	191289	282717	394171	552391
376	2714	13247	39886	85276	137609	186650	278641	385691	540438
377	2600	13132	39654	84493	134183	182285	271419	379087	531173
378	2341	12404	38359	81687	131275	178004	266822	371018	518498
379	2283	12792	37772	80229	128647	175967	260923	363646	506899
380	2039	12427	36610	78086	126028	171972	255425	353733	496474
381	2049	12151	35914	76952	123088	167180	249038	346913	486524
382	2143	11812	35240	75287	120100	163323	244425	338835	476462
383	2063	11496	34739	73428	117503	160997	238413	332001	465466
384	2013	11516	33500	71501	114811	156529	233676	323368	454490
385	2189	11224	32710	69840	112848	152364	227002	314824	442921
386	1940	10506	31984	68309	109147	149631	219884	307246	432185
387	1364	10196	30890	65967	106305	144574	214722	299134	420851
388	1586	10030	30013	64508	102889	139992	208196	289622	407766
389	1708	9594	28891	62132	99118	134982	202012	279670	394290
390	1601	9496	28165	61009	96276	131930	196282	271858	381934
391	1653	9021	27294	58209	93328	127532	189974	263120	371047
392	1626	8812	26836	56683	90331	123514	183810	255051	359074
393	1448	8501	25851	54938	87456	119611	177536	248270	347996
394	1326	8184	25150	53373	84410	115117	171806	238210	337022
395	1368	8028	24173	51335	81594	111393	165151	231417	326206
396	1193	7738	23217	49882	78649	107619	160408	223093	315706
397	1245	7442	22538	48012	76060	104905	155387	214668	305080
398	1145	7317	21683	46192	73595	100853	149241	208218	295214
399	918	6933	21358	44982	71232	96733	144748	201370	285205
400	841	6544	20541	42993	69007	94100	140066	193907	275387
