# Supplementary material for: The intrinsically disordered cytoplasmic tail of a dendrite branching receptor uses two distinct mechanisms to regulate the actin cytoskeleton
Source: eLife journal article supplement (doi:10.7554/elife.88492), 2023-07-17
Supplement: fig4-figsupp2-data2 [file Figure 4 - figure supplement 2B source data.xlsx]

## Sheet: ICD Raw Data
	1uM	2uM	5uM	10uM	15uM	20uM	30uM	40uM	50uM
320	249	4794	13917	30424	47396	65570	97359	133916	188252
321	716	5271	15284	32804	51972	71820	105772	146611	205336
322	892	5551	16694	35668	56769	77832	114197	158953	223518
323	1141	6177	18156	38405	61211	84335	124119	172168	241784
324	735	6577	19320	41053	66141	90340	133433	185797	259827
325	1037	6828	20769	44490	71271	96884	144234	199666	279699
326	1248	7368	22048	47238	76336	104327	154436	213451	299077
327	1335	7732	23688	50202	80843	111083	164584	228025	318579
328	1549	8333	25153	53394	85667	116672	173583	241672	337532
329	1592	8728	26392	56595	90994	125118	184172	255133	358178
330	1602	9141	28108	59654	96071	131587	195296	269221	376899		concentration (uM)	1uM	2uM	5uM	10uM	15uM	20uM	30uM	40uM	50uM
331	1708	9879	29646	62884	101355	138048	204649	284131	397060		Fluorescence at 356nm	3422	16891	49524	106104	172338	234038	346380	482162	672605
332	1716	10599	30829	65770	106372	145516	214477	298104	416553
333	2324	10476	32542	68893	110625	151785	224191	310877	434711		conc	normalized fluorescence (RFU/conc)
334	2312	11826	33697	71792	116151	158024	233466	323972	454124		1	3422
335	2274	11611	35355	74764	119544	163599	242580	337532	472102		2	8445.5
336	2454	12122	36107	77710	124521	169447	251904	350016	488852		5	9904.8
337	2619	12662	37294	80110	128754	176400	258934	360535	504570		10	10610.4
338	2787	12862	38348	83038	132551	181740	267827	372287	521509		15	11489.2
339	2800	13317	39599	85178	137055	185259	276851	383099	537883		20	11701.9
340	2743	13800	41275	87327	140667	190596	284385	393133	550514		30	11546
341	2705	14092	42239	89303	143806	196380	290018	403937	562678		40	12054
342	3147	14168	42517	91675	147712	199820	297160	413562	575432		50	13452.1
343	2894	14490	44012	93449	149931	204431	303025	419566	590498
344	3009	14812	44045	95295	153416	208631	307729	429677	600428
345	2901	14970	45089	96266	156384	211894	314103	438266	609347
346	3394	15467	45687	98434	158520	215710	318714	443127	619496
347	3164	15845	46399	99255	160119	218394	323692	450569	629706
348	3280	15670	47315	101162	162059	221004	327355	457028	638522
349	3094	16126	47693	101627	164787	223933	332070	460308	644261
350	3086	16620	48202	103247	166649	225956	335038	466522	652359
351	3208	16568	49049	104161	168076	227785	338735	471372	655771
352	3113	16287	49098	104483	169558	230680	341741	474806	661768
353	3622	16499	49572	105166	169450	230428	343695	477360	666079
354	3182	16699	49690	106369	170861	233010	345284	478011	670764
355	3230	16798	49546	106491	171645	232590	345763	480199	671455
356	3422	16891	49524	106104	172338	234038	346380	482162	672605
357	3477	16759	49747	106291	172003	232940	346806	480702	672001
358	3362	16837	50504	106453	171307	233211	345930	479405	672396
359	3563	16631	49564	106500	171687	232792	345259	479301	671420
360	3289	16679	50172	105835	170547	232763	344228	476645	668491
361	3365	16650	48554	105825	168935	231012	342772	475126	663887
362	3570	16744	49048	104933	168034	228805	339573	471185	659450
363	3135	16515	47900	103980	166839	227195	337365	468682	656283
364	3608	16410	48129	102402	165746	224808	334232	464763	650130
365	3497	16393	47635	102099	163604	223440	331225	461266	642819
366	3457	15888	47424	99701	161927	220854	326759	454497	634587
367	3298	15815	46473	99423	160642	217802	323787	448745	629789
368	3205	15275	45797	98597	158568	214780	319149	445443	620173
369	2795	15388	45747	97054	155106	211361	314964	437108	612999
370	2803	14609	44822	95449	153738	209691	308112	430949	602819
371	2989	14276	43755	94097	150385	205739	304741	422166	594530
372	2900	14425	43233	92820	148091	201833	299157	415868	584045
373	2697	14199	42034	90668	145321	198831	294901	409376	572687
374	2626	13924	41560	88718	142179	195266	289514	401916	562825
375	2711	13576	40816	87322	140330	191289	282717	394171	552391
376	2714	13247	39886	85276	137609	186650	278641	385691	540438
377	2600	13132	39654	84493	134183	182285	271419	379087	531173
378	2341	12404	38359	81687	131275	178004	266822	371018	518498
379	2283	12792	37772	80229	128647	175967	260923	363646	506899
380	2039	12427	36610	78086	126028	171972	255425	353733	496474
381	2049	12151	35914	76952	123088	167180	249038	346913	486524
382	2143	11812	35240	75287	120100	163323	244425	338835	476462
383	2063	11496	34739	73428	117503	160997	238413	332001	465466
384	2013	11516	33500	71501	114811	156529	233676	323368	454490
385	2189	11224	32710	69840	112848	152364	227002	314824	442921
386	1940	10506	31984	68309	109147	149631	219884	307246	432185
387	1364	10196	30890	65967	106305	144574	214722	299134	420851
388	1586	10030	30013	64508	102889	139992	208196	289622	407766
389	1708	9594	28891	62132	99118	134982	202012	279670	394290
390	1601	9496	28165	61009	96276	131930	196282	271858	381934
391	1653	9021	27294	58209	93328	127532	189974	263120	371047
392	1626	8812	26836	56683	90331	123514	183810	255051	359074
393	1448	8501	25851	54938	87456	119611	177536	248270	347996
394	1326	8184	25150	53373	84410	115117	171806	238210	337022
395	1368	8028	24173	51335	81594	111393	165151	231417	326206
396	1193	7738	23217	49882	78649	107619	160408	223093	315706
397	1245	7442	22538	48012	76060	104905	155387	214668	305080
398	1145	7317	21683	46192	73595	100853	149241	208218	295214
399	918	6933	21358	44982	71232	96733	144748	201370	285205
400	841	6544	20541	42993	69007	94100	140066	193907	275387

## Sheet: GB1 Raw Data
	1uM	2uM	5uM	10uM	15uM	20uM	30uM
nm	RFU	RFU	RFU	RFU	RFU	RFU	RFU
320	17874	41515	121813	257567	391797	507516	787659
321	19218	44503	132164	278465	420860	544921	846127
322	20702	47709	141173	296395	449797	584290	906668
323	21735	51452	150018	317608	481123	621524	962565
324	23182	54520	159070	338018	508657	659600	1022372
325	24650	57663	168937	356787	538861	698348	1080047
326	25936	60721	177942	379133	567196	735348	1138758
327	27315	63604	186362	396691	596956	770586	1196134				1	2	5	10	15	20	30
328	28758	66424	195216	415179	623480	807437	1248324			348	40824	95289	279052	607735	889801	1148017	1769327
329	29995	69777	204108	435458	648621	841527	1301633
330	31171	72541	211818	452703	674694	876381	1350483
331	31988	75042	219682	468227	700075	905304	1400297
332	33317	77229	226598	486079	723651	935853	1444318			1	10206
333	33935	79745	233736	501259	744111	962816	1487000			2	11911.1
334	35393	81322	239099	513924	764594	988663	1523143			5	13952.6
335	36242	83917	245453	526044	780864	1011213	1556853			10	15193.4
336	36854	84958	250612	540269	797172	1031788	1593678			15	14830
337	37700	87385	255833	551484	815400	1052103	1624283			20	14350.2
338	38092	88925	260675	561701	829554	1070708	1649548			30	14744.4
339	38915	90262	263771	569959	838985	1085542	1672062
340	39379	90892	267155	576774	851136	1100163	1693353
341	39583	91973	270533	584352	858688	1110059	1710219
342	39935	92504	272588	588822	866102	1119985	1724735
343	40506	94504	274885	594864	872222	1129121	1737311
344	40621	93947	276124	599262	877077	1134136	1747626
345	40722	94670	277320	603295	883713	1139521	1757351
346	40679	95176	278924	605669	886438	1145185	1762915
347	40992	95962	279528	606528	887800	1146343	1766383
348	40824	95289	279052	607735	889801	1148017	1769327
349	41121	94802	279607	608130	888748	1147957	1767017
350	40886	95261	278364	608281	888006	1146212	1766812
351	40794	94586	278536	606996	887396	1142590	1763080
352	41045	94661	277532	604117	881148	1139195	1754005
353	40322	93540	275506	600649	877402	1134394	1745084
354	40412	94048	274490	597668	869471	1126169	1734249
355	39650	92957	271171	593379	862786	1115972	1720082
356	39200	91829	268579	586562	856127	1103823	1699983
357	39189	90915	265726	581356	845004	1093975	1683665
358	38588	88942	263364	573523	834444	1079370	1662070
359	37747	88632	258471	565595	822469	1064530	1640910
360	37366	87070	255216	557345	810405	1050311	1616971
361	36906	85782	249751	551261	799281	1031051	1593771
362	36279	84135	245921	540773	784665	1013676	1564926
363	35711	82533	242711	531901	770575	996718	1537078
364	34999	80894	239029	524477	754628	978907	1510502
365	34298	80012	232613	512117	741311	960419	1481836
366	33734	77165	229108	502652	727565	939373	1449053
367	32901	76185	224030	490928	710423	920006	1419435
368	31742	74413	218157	481488	694891	899499	1389844
369	31167	72346	212760	471385	679226	879899	1356303
370	30175	70893	207781	458897	663831	857239	1324601
371	29431	68948	201776	448320	645883	834256	1291772
372	29151	66776	197482	436447	629229	814605	1258276
373	27970	65693	192413	423094	609514	792503	1224037
374	27459	63581	187018	412168	594261	771605	1190984
375	26534	61815	181488	402044	578927	747484	1159281
376	26068	59898	175426	389180	561378	727131	1125116
377	25290	58085	170479	377954	545855	704991	1090182
378	24461	56222	166097	365986	527915	685639	1059361
379	23448	54478	160488	356194	514137	663947	1027531
380	23183	53353	156183	345763	498047	643736	998571
381	22388	51819	151974	332707	482978	625006	968488
382	21521	50454	145625	324631	467127	604982	940711
383	20820	48422	142521	314947	453296	587952	911527
384	20033	46336	137755	303390	438457	568116	882737
385	19602	45490	132723	293794	423231	548013	851633
386	18661	43985	128202	282961	410411	531121	824454
387	18111	42707	123878	272017	395443	512582	795809
388	17522	40547	119323	262858	380073	492288	766997
389	17113	39288	115151	251814	365253	472587	733275
390	16251	37583	110722	242028	352237	456723	706500
391	15532	35846	106127	233288	337913	437518	682070
392	15063	34693	102282	223329	324495	422786	654357
393	14461	33575	97537	214252	311056	405465	629297
394	14132	32286	94406	205535	299818	388536	604624
395	13582	30582	89906	197350	287634	372933	578972
396	12892	29580	86561	188395	275539	358618	555681
397	12195	28306	82905	181440	264673	343443	534213
398	11759	27145	79148	173238	254504	328854	513026
399	11295	25898	76417	166530	243075	315858	490271
400	10928	25394	73235	159091	234627	303004	472319
