# Supplementary material for: The intrinsically disordered cytoplasmic tail of a dendrite branching receptor uses two distinct mechanisms to regulate the actin cytoskeleton
Source: eLife journal article supplement (doi:10.7554/elife.88492), 2023-07-17
Supplement: fig4-figsupp2-data2 [file Figure 4 - figure supplement 2D and E source data.xlsx]

## Sheet: W22R 50PDB
	0.5uM HPO30(light)	W22R	W22R + HPO30(light)	((W22R + light) - W22R)					0.5uM HPO30(light)	((W22R + light) - W22R)			Note: This is columns A and E from the left hand side, but this is the data used in making the figures
nm	RFU	RFU	RFU	RFU				nm	RFU	RFU
320	3052	15473	21725	6252				320	3052	6252
321	3649	16445	23475	7030				321	3649	7030
322	3934	17829	24592	6763				322	3934	6763
323	4072	17870	26175	8305				323	4072	8305
324	4197	18960	27387	8427				324	4197	8427
325	4770	19973	29244	9271				325	4770	9271
326	5080	20493	30435	9942				326	5080	9942
327	5329	21207	32147	10940				327	5329	10940
328	5658	21723	32846	11123				328	5658	11123
329	6321	22786	34271	11485				329	6321	11485
330	6129	23656	35562	11906				330	6129	11906
331	7017	24290	37160	12870				331	7017	12870
332	7073	25021	38669	13648				332	7073	13648
333	6940	25438	39597	14159				333	6940	14159
334	7981	26329	40946	14617				334	7981	14617
335	8303	26368	41819	15451				335	8303	15451
336	7903	26726	42890	16164				336	7903	16164
337	8704	27085	43963	16878				337	8704	16878
338	8802	27811	44499	16688				338	8802	16688
339	9267	28464	45701	17237				339	9267	17237
340	9733	28054	46261	18207				340	9733	18207
341	9367	29023	47310	18287				341	9367	18287
342	9808	29375	47959	18584				342	9808	18584
343	10250	29139	48283	19144				343	10250	19144
344	10205	29253	48305	19052				344	10205	19052
345	10590	29564	49607	20043				345	10590	20043
346	10435	29282	49709	20427				346	10435	20427
347	10519	29284	49982	20698				347	10519	20698
348	10560	28682	50163	21481				348	10560	21481
349	10788	29338	50856	21518				349	10788	21518
350	10992	29355	50578	21223				350	10992	21223
351	10965	29270	49801	20531				351	10965	20531
352	11163	28861	50115	21254				352	11163	21254
353	11608	28737	50642	21905				353	11608	21905
354	11052	28266	50402	22136				354	11052	22136
355	11304	28298	50386	22088				355	11304	22088
356	11191	27857	50015	22158				356	11191	22158
357	11039	27346	50086	22740				357	11039	22740
358	11534	27063	49500	22437				358	11534	22437
359	11207	26653	48863	22210				359	11207	22210
360	10941	26412	48678	22266				360	10941	22266
361	11222	26193	48740	22547				361	11222	22547
362	11419	25891	47825	21934				362	11419	21934
363	10717	24754	46688	21934				363	10717	21934
364	10344	24723	46158	21435				364	10344	21435
365	10683	24287	45732	21445				365	10683	21445
366	10478	23535	44984	21449				366	10478	21449
367	10663	23016	44603	21587				367	10663	21587
368	10273	22250	43485	21235				368	10273	21235
369	9841	21780	42914	21134				369	9841	21134
370	9980	21447	42363	20916				370	9980	20916
371	10004	21485	41703	20218				371	10004	20218
372	9965	20690	40593	19903				372	9965	19903
373	9161	20096	39340	19244				373	9161	19244
374	9282	19724	39216	19492				374	9282	19492
375	9026	18757	38011	19254				375	9026	19254
376	8820	18290	37493	19203				376	8820	19203
377	8590	17918	36353	18435				377	8590	18435
378	8473	17429	35275	17846				378	8473	17846
379	8307	16933	34816	17883				379	8307	17883
380	8270	16238	34000	17762				380	8270	17762
381	7743	15844	32819	16975				381	7743	16975
382	7990	15691	32583	16892				382	7990	16892
383	7710	14983	32338	17355				383	7710	17355
384	7240	14791	31328	16537				384	7240	16537
385	7268	14457	30972	16515				385	7268	16515
386	6867	13775	29395	15620				386	6867	15620
387	6711	13469	29013	15544				387	6711	15544
388	6739	12925	28337	15412				388	6739	15412
389	6556	12776	27424	14648				389	6556	14648
390	5981	12006	26229	14223				390	5981	14223
391	5965	11815	26066	14251				391	5965	14251
392	5560	11219	25123	13904				392	5560	13904
393	5809	10915	24807	13892				393	5809	13892
394	5353	10756	24397	13641				394	5353	13641
395	5224	10243	23337	13094				395	5224	13094
396	5144	9827	23056	13229				396	5144	13229
397	4600	9618	22188	12570				397	4600	12570
398	4776	9537	22058	12521				398	4776	12521
399	4517	9196	21740	12544				399	4517	12544
400	4290	8624	20852	12228				400	4290	12228

## Sheet: W22R 200PDB
	0.5uM HPO30(light)	W22R	W22R + HPO30(light)	((W22R + light) - W22R)					0.5uM HPO30(light)	((W22R + light) - W22R)		Note: This is columns A and E from the left hand side, but this is the data used in making the figures
nm	RFU	RFU	RFU	RFU				nm	RFU	RFU
320	2377	15055	18676	3621				320	2377	3621
321	2809	16018	20545	4527				321	2809	4527
322	3601	17274	22020	4746				322	3601	4746
323	3657	18435	23291	4856				323	3657	4856
324	3490	18832	24284	5452				324	3490	5452
325	3658	19578	25270	5692				325	3658	5692
326	4323	20502	27127	6625				326	4323	6625
327	4197	21494	28299	6805				327	4197	6805
328	4540	22197	28917	6720				328	4540	6720
329	4964	22830	30635	7805				329	4964	7805
330	5329	23878	32253	8375				330	5329	8375
331	5809	24846	33323	8477				331	5809	8477
332	5429	25672	33995	8323				332	5429	8323
333	5542	25906	35390	9484				333	5542	9484
334	5818	26523	36366	9843				334	5818	9843
335	6371	27120	37458	10338				335	6371	10338
336	6911	27891	38618	10727				336	6911	10727
337	6814	27799	39102	11303				337	6814	11303
338	6886	28205	39232	11027				338	6886	11027
339	7006	28594	40634	12040				339	7006	12040
340	7074	28526	40774	12248				340	7074	12248
341	7254	29962	42099	12137				341	7254	12137
342	7534	29355	42537	13182				342	7534	13182
343	7982	30299	42701	12402				343	7982	12402
344	7578	29223	43168	13945				344	7578	13945
345	7819	30569	43937	13368				345	7819	13368
346	8060	30182	44003	13821				346	8060	13821
347	8111	30428	43880	13452				347	8111	13452
348	8077	29876	44671	14795				348	8077	14795
349	8526	30500	45071	14571				349	8526	14571
350	8626	30602	44843	14241				350	8626	14241
351	8426	30370	45196	14826				351	8426	14826
352	8652	30153	45174	15021				352	8652	15021
353	8784	30102	45348	15246				353	8784	15246
354	8303	29577	44948	15371				354	8303	15371
355	8865	29868	44809	14941				355	8865	14941
356	8383	29085	44624	15539				356	8383	15539
357	8375	28985	43955	14970				357	8375	14970
358	8491	28783	44093	15310				358	8491	15310
359	8289	28088	43480	15392				359	8289	15392
360	8425	28380	43380	15000				360	8425	15000
361	8622	27672	42520	14848				361	8622	14848
362	8198	26942	42312	15370				362	8198	15370
363	8278	26734	41314	14580				363	8278	14580
364	8159	26394	40563	14169				364	8159	14169
365	8114	25125	40551	15426				365	8114	15426
366	8194	24626	39125	14499				366	8194	14499
367	7989	24861	38897	14036				367	7989	14036
368	7928	24391	37934	13543				368	7928	13543
369	7442	23604	37565	13961				369	7442	13961
370	7520	23078	36707	13629				370	7520	13629
371	7414	22648	35767	13119				371	7414	13119
372	7421	22095	35490	13395				372	7421	13395
373	7518	21787	34869	13082				373	7518	13082
374	7147	20985	33803	12818				374	7147	12818
375	6968	20173	32823	12650				375	6968	12650
376	6847	19664	32480	12816				376	6847	12816
377	6767	19297	31546	12249				377	6767	12249
378	6520	18716	30926	12210				378	6520	12210
379	6320	18263	29812	11549				379	6320	11549
380	6093	17894	28973	11079				380	6093	11079
381	6101	16935	28232	11297				381	6101	11297
382	5972	16742	27423	10681				382	5972	10681
383	5703	16376	26455	10079				383	5703	10079
384	5943	16198	26367	10169				384	5943	10169
385	5665	15515	25695	10180				385	5665	10180
386	5355	14925	24945	10020				386	5355	10020
387	5379	14564	24078	9514				387	5379	9514
388	5601	13921	23281	9360				388	5601	9360
389	5007	13598	22450	8852				389	5007	8852
390	4871	12978	21813	8835				390	4871	8835
391	4899	13031	21232	8201				391	4899	8201
392	4682	12482	20531	8049				392	4682	8049
393	4561	12042	20089	8047				393	4561	8047
394	4285	11564	18977	7413				394	4285	7413
395	4143	11161	18786	7625				395	4143	7625
396	4012	10700	18163	7463				396	4012	7463
397	3974	10519	17732	7213				397	3974	7213
398	3856	10260	17045	6785				398	3856	6785
399	3827	9657	16379	6722				399	3827	6722
400	3648	9522	15928	6406				400	3648	6406
