# Supplementary material for: The intrinsically disordered cytoplasmic tail of a dendrite branching receptor uses two distinct mechanisms to regulate the actin cytoskeleton
Source: eLife journal article supplement (doi:10.7554/elife.88492), 2023-07-17
Supplement: fig5-data1 [file Figure 5C Actin Inhibition.xlsx]

## Sheet: Sheet1
NOTE: values under the sample name denote RFU
time (s)	actin #1	actin #2	F/F-ICD Rap #1	F/F-ICD Rap #2
0	741	769	741	741
4.268	750	777	730	744
9.282	748	777	745	743
14.286	742	777	743	747
19.277	755	781	738	757
24.271	747	775	749	759
29.276	750	785	744	762
34.285	761	784	754	770
39.294	752	783	752	759
44.294	763	796	752	764
49.289	759	789	751	772
54.299	766	792	758	774
59.3	769	800	756	769
64.306	768	802	752	778
69.315	781	796	765	785
74.319	778	803	763	778
79.32	783	795	762	782
84.326	791	802	771	785
89.329	789	802	765	784
94.332	790	808	769	792
99.331	791	826	783	792
104.344	802	814	779	801
109.348	801	820	787	797
114.346	806	829	781	806
119.357	808	828	783	810
124.358	808	838	787	816
129.362	819	843	799	804
134.364	823	847	802	827
139.356	838	847	799	823
144.359	834	852	813	834
149.362	835	858	807	835
154.364	850	874	818	842
159.364	854	874	821	838
164.377	851	877	823	846
169.38	864	876	832	854
174.385	864	886	834	856
179.395	871	893	828	860
184.398	879	908	838	870
189.412	878	911	842	869
194.417	891	918	839	875
199.425	891	920	849	877
204.418	904	938	859	887
209.425	908	944	865	894
214.429	912	951	866	898
219.439	910	968	863	898
224.441	924	962	871	900
229.442	932	971	876	900
234.445	942	985	884	917
239.451	940	997	893	910
244.459	949	1001	883	925
249.457	949	1010	900	931
254.459	951	1018	902	937
259.465	958	1028	901	942
264.469	967	1041	914	952
269.446	986	1046	912	947
274.449	981	1059	916	954
279.455	980	1071	919	949
284.464	1003	1079	930	953
289.474	1012	1094	932	964
294.461	1022	1096	942	972
299.468	1029	1118	943	981
304.472	1033	1125	947	977
309.473	1056	1137	953	991
314.483	1055	1142	952	993
319.463	1063	1158	960	1003
324.465	1083	1164	955	998
329.491	1080	1184	975	1013
334.487	1088	1186	968	1017
339.483	1100	1198	971	1015
344.483	1117	1214	984	1016
349.486	1114	1220	987	1015
354.5	1132	1233	993	1035
359.491	1144	1245	990	1037
364.49	1146	1257	1000	1039
369.486	1163	1268	1006	1057
374.497	1174	1293	1010	1054
379.468	1184	1300	1019	1057
384.471	1191	1317	1024	1066
389.473	1201	1318	1032	1073
394.476	1207	1328	1029	1081
399.477	1230	1348	1030	1085
404.489	1226	1360	1041	1088
409.489	1241	1371	1042	1095
414.492	1247	1376	1047	1102
419.5	1266	1395	1060	1103
424.513	1274	1410	1055	1105
429.508	1280	1421	1051	1110
434.492	1303	1444	1075	1129
439.495	1309	1449	1078	1130
444.497	1313	1464	1087	1138
449.498	1317	1477	1089	1135
454.518	1342	1498	1077	1155
459.52	1346	1503	1100	1146
464.518	1363	1515	1099	1150
469.527	1375	1528	1107	1154
474.531	1382	1544	1101	1155
479.527	1403	1560	1120	1167
484.538	1402	1564	1129	1185
489.514	1408	1587	1113	1184
494.527	1439	1594	1136	1179
499.523	1438	1617	1132	1193
504.528	1457	1636	1142	1186
509.537	1463	1651	1141	1196
514.547	1470	1660	1146	1198
519.527	1492	1664	1159	1207
524.531	1494	1681	1162	1220
529.526	1509	1701	1153	1214
534.531	1516	1707	1182	1220
539.534	1533	1728	1166	1228
544.537	1553	1727	1190	1231
549.534	1563	1749	1177	1239
554.541	1564	1765	1203	1244
559.557	1581	1782	1196	1258
564.555	1594	1798	1202	1266
569.544	1615	1811	1205	1270
574.538	1622	1833	1219	1268
579.539	1637	1833	1217	1273
584.552	1656	1853	1219	1287
589.551	1646	1861	1228	1284
594.565	1671	1868	1220	1291
599.562	1668	1892	1230	1298
604.581	1691	1901	1241	1306
609.579	1712	1917	1249	1308
614.581	1717	1947	1257	1312
619.581	1722	1951	1249	1319
624.592	1734	1965	1256	1327
629.587	1747	1973	1269	1324
634.598	1763	1994	1257	1326
639.587	1773	1993	1277	1340
644.586	1784	2026	1269	1351
649.599	1800	2043	1291	1349
654.591	1812	2044	1293	1350
659.585	1821	2051	1293	1361
664.602	1839	2079	1303	1365
669.602	1846	2096	1307	1373
674.6	1862	2098	1313	1384
679.606	1881	2119	1311	1390
684.612	1888	2135	1316	1378
689.614	1896	2138	1322	1397
694.619	1912	2156	1326	1391
699.62	1918	2156	1338	1406
704.616	1937	2169	1349	1409
709.632	1957	2195	1353	1415
714.632	1955	2207	1354	1421
719.629	1968	2221	1353	1427
724.634	1976	2231	1354	1431
729.632	1989	2246	1371	1426
734.639	2009	2263	1375	1437
739.646	2017	2265	1383	1447
744.646	2031	2290	1378	1444
749.646	2044	2303	1380	1452
754.662	2052	2313	1391	1455
759.647	2063	2316	1395	1472
764.661	2080	2335	1398	1475
769.651	2081	2363	1404	1472
774.657	2092	2362	1408	1487
779.663	2109	2380	1413	1490
784.666	2123	2401	1423	1498
789.682	2128	2399	1420	1500
794.685	2153	2398	1444	1497
799.684	2166	2426	1432	1506
804.691	2173	2431	1430	1513
809.692	2186	2458	1454	1514
814.692	2200	2459	1442	1513
819.708	2201	2496	1462	1528
824.701	2226	2495	1465	1521
829.699	2217	2507	1469	1535
834.703	2240	2509	1479	1557
839.69	2257	2526	1469	1546
844.694	2268	2545	1479	1564
849.69	2283	2566	1482	1553
854.704	2291	2568	1490	1571
859.709	2300	2581	1500	1561
864.716	2317	2580	1492	1563
869.712	2315	2605	1500	1574
874.721	2333	2605	1511	1590
879.724	2339	2623	1518	1586
884.728	2348	2649	1514	1591
889.723	2385	2651	1517	1601
894.727	2374	2670	1512	1607
899.729	2386	2677	1523	1617
904.733	2395	2686	1527	1627
909.73	2419	2705	1539	1635
914.736	2428	2713	1543	1630
919.736	2439	2719	1551	1622
924.738	2445	2738	1549	1643
929.741	2465	2731	1560	1632
934.741	2456	2762	1557	1656
939.742	2476	2769	1577	1656
944.745	2501	2780	1584	1660
949.75	2491	2795	1582	1665
954.75	2519	2809	1584	1666
959.754	2529	2818	1588	1675
964.754	2529	2812	1587	1683
969.759	2543	2829	1603	1682
974.77	2543	2852	1598	1675
979.768	2569	2871	1601	1690
984.773	2569	2874	1606	1689
989.775	2579	2883	1611	1684
994.772	2594	2892	1622	1699
999.775	2600	2899	1634	1711
1004.78	2619	2905	1624	1708
1009.78	2633	2925	1634	1715
1014.79	2652	2939	1627	1714
1019.77	2645	2953	1628	1718
1024.77	2657	2965	1639	1743
1029.77	2663	2951	1651	1738
1034.78	2679	2974	1653	1739
1039.78	2698	2980	1661	1736
1044.78	2697	3000	1656	1753
1049.77	2703	3017	1679	1759
1054.79	2717	3024	1669	1751
1059.78	2717	3018	1674	1759
1064.79	2735	3036	1675	1771
1069.78	2754	3055	1688	1759
1074.79	2766	3051	1691	1774
1079.79	2759	3065	1696	1785
1084.79	2779	3084	1682	1789
1089.79	2783	3088	1695	1797
1094.8	2792	3100	1706	1791
1099.81	2817	3109	1722	1786
1104.8	2805	3119	1707	1797
1109.8	2812	3132	1717	1797
1114.81	2856	3141	1724	1816
1119.81	2851	3127	1722	1826
1124.82	2867	3144	1733	1832
1129.8	2869	3161	1744	1828
1134.8	2879	3179	1739	1825
1139.81	2871	3161	1751	1843
1144.82	2902	3195	1740	1828
1149.81	2903	3206	1757	1851
1154.81	2904	3200	1758	1860
1159.81	2916	3230	1758	1854
1164.82	2935	3233	1764	1861
1169.82	2932	3241	1768	1875
1174.81	2942	3255	1779	1862
1179.82	2951	3241	1772	1876
1184.82	2963	3266	1782	1879
1189.83	2972	3259	1776	1883
1194.83	2976	3277	1796	1876
1199.83	2999	3284	1806	1889
1204.83	3013	3293	1787	1906
1209.84	3010	3303	1798	1890
1214.84	3028	3297	1808	1915
1219.84	3042	3311	1823	1901
1224.84	3038	3337	1812	1916
1229.84	3046	3337	1818	1921
1234.84	3043	3340	1819	1911
1239.84	3069	3366	1830	1917
1244.85	3067	3354	1835	1930
1249.85	3071	3369	1841	1929
1254.85	3083	3371	1843	1942
1259.86	3107	3395	1852	1929
1264.85	3107	3396	1847	1945
1269.84	3105	3422	1850	1947
1274.85	3112	3412	1865	1948
1279.85	3134	3422	1862	1943
1284.85	3153	3436	1859	1957
1289.85	3140	3442	1866	1961
1294.86	3163	3457	1872	1960
1299.86	3167	3451	1868	1987
1304.86	3162	3450	1877	1975
1309.86	3172	3464	1880	1982
1314.86	3178	3497	1894	1979
1319.87	3190	3481	1890	1984
1324.87	3182	3499	1887	1993
1329.87	3191	3483	1889	2002
1334.88	3206	3502	1908	2002
1339.89	3231	3520	1879	2003
1344.89	3250	3527	1901	2010
1349.91	3235	3528	1905	2002
1354.9	3233	3551	1911	2026
1359.91	3263	3568	1928	2013
1364.92	3251	3552	1925	2027
1369.92	3268	3532	1941	2030
1374.91	3290	3561	1929	2032
1379.91	3289	3577	1931	2030
1384.92	3280	3599	1938	2031
1389.93	3298	3591	1949	2046
1394.93	3332	3599	1939	2040
1399.92	3310	3609	1948	2043
1404.93	3331	3602	1952	2055
1409.94	3323	3614	1963	2057
1414.94	3335	3627	1950	2067
1419.95	3343	3628	1957	2070
1424.95	3341	3618	1965	2069
1429.96	3360	3626	1961	2079
1434.96	3384	3647	1979	2067
1439.97	3379	3633	1982	2082
1444.96	3378	3665	1981	2074
1449.98	3389	3676	1980	2082
1454.98	3402	3671	1986	2074
1459.96	3413	3654	1999	2097
1464.97	3416	3686	1982	2103
1469.97	3411	3681	2001	2098
1474.97	3440	3701	1991	2107
1479.97	3431	3715	2007	2102
1484.99	3441	3711	2020	2107
1489.98	3442	3711	2006	2113
1495	3449	3733	2005	2117
1499.99	3452	3721	2022	2113
1504.99	3455	3740	2015	2120
1509.98	3467	3747	2020	2135
1515	3470	3757	2019	2139
1520	3487	3756	2032	2133
1525.01	3489	3755	2038	2150
1530.01	3494	3754	2044	2124
1535.01	3511	3777	2050	2154
1540.02	3517	3779	2053	2139
1545.03	3510	3811	2047	2150
1550.02	3532	3800	2056	2148
1555.01	3529	3798	2062	2167
1560.03	3537	3827	2060	2168
1565.01	3536	3806	2049	2171
1570.02	3535	3801	2051	2169
1575.04	3552	3821	2062	2173
1580.03	3547	3822	2078	2189
1585.04	3564	3846	2080	2177
1590.04	3578	3828	2073	2183
1595.04	3576	3844	2085	2195
1600.04	3595	3852	2073	2176
1605.03	3589	3862	2095	2200
1610.03	3599	3860	2078	2180
1615.03	3610	3869	2097	2196
1620.05	3615	3860	2087	2201
1625.05	3610	3887	2100	2206
1630.05	3604	3874	2105	2206
1635.06	3603	3878	2111	2202
1640.06	3621	3877	2099	2227
1645.07	3636	3906	2099	2220
1650.05	3639	3909	2121	2214
1655.06	3654	3907	2119	2229
1660.05	3653	3913	2124	2225
1665.06	3662	3917	2119	2231
1670.05	3668	3936	2122	2226
1675.07	3674	3933	2135	2240
1680.08	3665	3932	2137	2242
1685.08	3685	3930	2132	2244
1690.06	3688	3934	2142	2239
1695.07	3698	3940	2145	2247
1700.05	3700	3948	2146	2251
1705.06	3705	3957	2150	2261
1710.07	3720	3960	2155	2261
1715.06	3704	3956	2154	2265
1720.07	3716	3986	2146	2271
1725.09	3703	3976	2167	2265
1730.09	3716	3974	2163	2257
1735.08	3728	4003	2172	2265
1740.09	3732	3991	2173	2277
1745.1	3719	3993	2162	2288
1750.1	3750	4006	2167	2284
1755.1	3741	3997	2171	2289
1760.1	3757	4006	2174	2285
1765.1	3766	3998	2185	2291
1770.11	3763	4015	2191	2292
1775.12	3781	4002	2185	2305
1780.11	3777	4026	2186	2302
1785.09	3777	4036	2197	2285
1790.1	3794	4044	2206	2294
1795.1	3786	4023	2185	2297
