# Supplementary material for: The intrinsically disordered cytoplasmic tail of a dendrite branching receptor uses two distinct mechanisms to regulate the actin cytoskeleton
Source: eLife journal article supplement (doi:10.7554/elife.88492), 2023-07-17
Supplement: fig5-figsupp1-data2 [file Figure 5 - figure Supplement 1B Source Data.xlsx]

## Sheet: Sheet1
NOTE: values under the sample name denote RFU
time (s)	actin		time (s)	WRC + dmso		time (s)	WRC + Rap		time (s)	WRC + 0.5uM Rac + dmso		time (s)	WRC + 0.5uM Rac + rap		time (s)	WRC + 0.4uM Rac + dmso		time (s)	WRC + 0.4uM Rac + rap
0	973		0	956		0	888		0	870		0	908		0	909		0	774
4.258	977		4.258	948		4.256	889		4.265	873		4.266	913		4.256	912		4.267	773
9.267	980		9.265	951		9.257	888		9.264	880		9.269	921		9.251	917		9.258	779
14.266	987		14.26	954		14.257	887		14.266	881		14.265	918		14.262	909		14.261	776
19.27	990		19.264	958		19.258	899		19.261	883		19.26	934		19.261	925		19.256	785
24.271	992		24.261	959		24.269	893		24.264	883		24.265	932		24.257	925		24.26	785
29.267	991		29.264	953		29.269	896		29.267	878		29.266	925		29.263	924		29.272	778
34.269	994		34.272	964		34.262	895		34.273	885		34.266	940		34.26	929		34.266	789
39.279	997		39.276	964		39.266	905		39.278	887		39.267	933		39.272	926		39.267	789
44.276	999		44.276	967		44.276	896		44.274	887		44.267	939		44.272	925		44.262	785
49.272	1001		49.265	962		49.271	899		49.258	890		49.271	939		49.264	930		49.286	789
54.27	1007		54.269	958		54.271	903		54.26	891		54.275	949		54.27	928		54.289	788
59.278	1002		59.265	965		59.267	902		59.261	886		59.27	950		59.28	935		59.287	788
64.276	1008		64.273	970		64.269	908		64.266	896		64.267	952		64.286	931		64.292	789
69.272	1004		69.268	965		69.271	911		69.255	893		69.278	954		69.283	937		69.3	794
74.276	1013		74.268	974		74.276	904		74.275	899		74.276	953		74.283	934		74.299	798
79.278	1008		79.267	975		79.267	908		79.27	900		79.279	954		79.295	946		79.298	793
84.277	1014		84.275	971		84.277	912		84.27	895		84.273	959		84.295	935		84.285	795
89.279	1021		89.277	966		89.281	901		89.263	899		89.273	954		89.304	936		89.296	798
94.283	1018		94.271	970		94.283	909		94.262	908		94.281	958		94.29	942		94.303	798
99.277	1019		99.273	967		99.28	908		99.271	901		99.28	965		99.301	931		99.305	799
104.284	1020		104.275	977		104.275	916		104.261	897		104.277	958		104.309	944		104.304	794
109.286	1019		109.276	965		109.278	914		109.259	891		109.278	954		109.308	942		109.306	800
114.287	1015		114.278	971		114.292	918		114.261	896		114.284	952		114.312	944		114.322	806
119.292	1028		119.277	978		119.294	910		119.284	898		119.287	960		119.32	940		119.309	800
124.289	1028		124.276	966		124.288	917		124.28	903		124.291	958		124.321	949		124.288	805
129.292	1035		129.279	962		129.295	922		129.288	901		129.28	958		129.32	945		129.306	806
134.29	1024		134.287	971		134.299	916		134.284	900		134.292	967		134.328	943		134.305	810
139.297	1038		139.28	978		139.3	918		139.289	906		139.292	966		139.321	955		139.308	810
144.292	1041		144.278	963		144.297	923		144.287	901		144.296	965		144.32	952		144.31	806
149.298	1037		149.286	976		149.297	923		149.286	903		149.292	960		149.347	952		149.311	809
154.295	1040		154.291	968		154.298	929		154.289	900		154.296	966		154.335	956		154.322	814
159.292	1043		159.289	963		159.299	922		159.278	900		159.297	970		159.331	954		159.319	811
164.293	1045		164.283	970		164.297	926		164.288	911		164.305	974		164.344	955		164.326	810
169.301	1051		169.285	974		169.291	919		169.287	908		169.298	970		169.344	962		169.317	805
174.292	1052		174.287	980		174.294	931		174.283	908		174.294	977		174.346	952		174.333	811
179.295	1052		179.294	974		179.305	928		179.29	910		179.306	976		179.358	958		179.336	816
184.299	1041		184.291	971		184.299	927		184.288	901		184.312	965		184.352	959		184.327	817
189.294	1047		189.288	981		189.3	925		189.292	916		189.311	967		189.354	954		189.328	815
194.294	1064		194.296	973		194.299	933		194.288	913		194.311	972		194.353	960		194.333	810
199.294	1062		199.295	986		199.302	927		199.295	913		199.308	971		199.359	953		199.334	818
204.297	1062		204.299	991		204.302	936		204.291	908		204.315	970		204.369	951		204.34	824
209.303	1058		209.288	986		209.298	932		209.294	916		209.318	975		209.365	963		209.334	819
214.282	1051		214.295	983		214.306	938		214.294	908		214.314	971		214.371	965		214.328	824
219.283	1055		219.304	981		219.305	937		219.296	916		219.307	967		219.367	965		219.347	826
224.282	1068		224.302	987		224.307	931		224.294	914		224.315	981		224.378	961		224.33	820
229.288	1062		229.295	988		229.304	934		229.297	913		229.318	977		229.376	961		229.327	813
234.285	1070		234.299	991		234.309	941		234.297	914		234.314	986		234.365	977		234.332	819
239.285	1061		239.306	993		239.304	929		239.299	923		239.318	967		239.375	960		239.336	818
244.287	1067		244.307	992		244.292	935		244.303	923		244.314	983		244.366	964		244.331	824
249.291	1062		249.308	989		249.29	937		249.302	918		249.319	985		249.377	954		249.328	822
254.292	1071		254.3	997		254.297	940		254.302	925		254.321	974		254.378	967		254.33	819
259.29	1076		259.314	993		259.298	944		259.287	927		259.318	986		259.378	970		259.343	821
264.286	1070		264.32	1008		264.285	941		264.289	927		264.327	983		264.383	961		264.332	829
269.295	1078		269.319	1003		269.286	944		269.295	930		269.32	976		269.39	968		269.341	825
274.295	1086		274.319	1004		274.286	949		274.293	926		274.324	985		274.388	960		274.321	824
279.293	1075		279.318	994		279.297	941		279.292	924		279.323	978		279.387	964		279.339	831
284.291	1088		284.325	996		284.29	945		284.302	932		284.33	986		284.399	961		284.346	824
289.299	1085		289.324	999		289.289	948		289.302	932		289.325	980		289.403	971		289.337	824
294.298	1087		294.329	1007		294.288	950		294.297	932		294.325	982		294.386	973		294.339	827
299.288	1087		299.328	1004		299.295	955		299.3	937		299.31	975		299.402	966		299.352	832
304.284	1083		304.328	1011		304.297	955		304.295	942		304.308	987		304.4	976		304.347	831
309.281	1094		309.331	1005		309.293	959		309.302	948		309.314	992		309.396	970		309.352	835
314.285	1097		314.329	1013		314.293	957		314.301	941		314.314	988		314.411	972		314.352	829
319.289	1103		319.332	1011		319.29	958		319.305	937		319.301	986		319.394	979		319.356	832
324.289	1097		324.33	1015		324.296	957		324.304	949		324.309	981		324.402	983		324.36	831
329.286	1099		329.329	1016		329.295	951		329.305	937		329.306	993		329.41	981		329.359	833
334.288	1100		334.33	1022		334.295	966		334.306	957		334.308	986		334.406	970		334.357	832
339.294	1103		339.325	1015		339.293	961		339.309	953		339.306	990		339.413	970		339.371	834
344.293	1100		344.331	1023		344.297	956		344.313	955		344.306	991		344.411	983		344.369	834
349.285	1098		349.328	1015		349.304	953		349.311	959		349.308	996		349.421	981		349.368	836
354.293	1116		354.334	1023		354.298	958		354.315	948		354.31	988		354.417	971		354.377	839
359.299	1108		359.331	1023		359.296	964		359.316	959		359.309	992		359.432	977		359.37	840
364.3	1116		364.336	1024		364.3	963		364.312	954		364.31	991		364.425	986		364.381	842
369.293	1103		369.333	1027		369.306	962		369.317	960		369.308	1001		369.425	987		369.371	838
374.291	1106		374.335	1023		374.302	963		374.318	961		374.315	997		374.43	983		374.38	840
379.285	1114		379.334	1033		379.304	960		379.319	958		379.319	992		379.439	987		379.378	839
384.295	1120		384.341	1032		384.308	966		384.321	959		384.298	998		384.435	979		384.379	847
389.297	1125		389.334	1027		389.311	962		389.312	964		389.295	1002		389.428	991		389.384	849
394.291	1118		394.339	1028		394.314	970		394.32	970		394.304	1004		394.426	983		394.385	849
399.287	1115		399.34	1029		399.309	966		399.324	969		399.301	1003		399.433	993		399.381	850
404.288	1121		404.34	1032		404.316	968		404.324	973		404.301	1000		404.449	997		404.388	853
409.288	1132		409.339	1034		409.317	972		409.32	970		409.301	1007		409.459	991		409.393	846
414.284	1132		414.332	1032		414.322	964		414.328	976		414.307	997		414.447	993		414.38	850
419.288	1121		419.334	1035		419.324	966		419.325	978		419.31	1009		419.455	991		419.394	848
424.289	1125		424.335	1039		424.316	971		424.328	979		424.312	1006		424.47	989		424.395	850
429.277	1127		429.342	1042		429.32	972		429.329	983		429.309	1007		429.446	990		429.397	845
434.274	1128		434.336	1044		434.324	978		434.329	986		434.307	1008		434.438	1000		434.401	845
439.272	1133		439.337	1041		439.326	970		439.328	984		439.311	1008		439.438	998		439.401	854
444.274	1140		444.333	1038		444.319	979		444.334	981		444.315	1015		444.443	999		444.4	847
449.281	1133		449.339	1048		449.323	963		449.333	981		449.308	1018		449.438	1002		449.4	849
454.274	1140		454.343	1048		454.329	976		454.327	989		454.31	1019		454.438	994		454.406	851
459.285	1145		459.338	1047		459.331	977		459.335	980		459.314	1019		459.424	990		459.402	857
464.28	1133		464.34	1048		464.328	976		464.343	999		464.302	1024		464.443	995		464.401	854
469.282	1140		469.347	1050		469.321	979		469.334	986		469.303	1023		469.445	1001		469.405	848
474.279	1134		474.342	1048		474.341	984		474.342	995		474.301	1022		474.444	990		474.399	859
479.284	1141		479.331	1043		479.331	975		479.338	990		479.298	1022		479.451	997		479.399	851
484.279	1128		484.331	1050		484.341	991		484.346	999		484.307	1030		484.441	997		484.399	855
489.283	1143		489.333	1048		489.339	978		489.347	997		489.306	1024		489.451	1005		489.406	860
494.284	1133		494.335	1047		494.345	973		494.347	1004		494.306	1027		494.469	1006		494.403	859
499.28	1133		499.336	1059		499.348	984		499.343	1006		499.302	1031		499.457	1007		499.407	853
504.288	1143		504.336	1058		504.348	980		504.339	1011		504.306	1031		504.466	1004		504.406	851
509.286	1145		509.336	1054		509.347	983		509.346	1005		509.309	1026		509.47	1009		509.408	860
514.287	1139		514.34	1056		514.347	979		514.348	1016		514.309	1030		514.482	1011		514.41	855
519.269	1141		519.347	1055		519.35	983		519.347	1017		519.307	1034		519.478	1015		519.418	846
524.273	1142		524.347	1056		524.352	981		524.345	1019		524.321	1033		524.467	1011		524.413	853
529.263	1142		529.339	1058		529.356	983		529.348	1009		529.322	1035		529.475	1009		529.415	866
534.266	1148		534.347	1057		534.346	981		534.349	1014		534.325	1041		534.478	1012		534.415	861
539.267	1148		539.346	1057		539.346	985		539.351	1029		539.323	1046		539.484	1007		539.421	863
544.27	1145		544.348	1066		544.349	988		544.35	1021		544.312	1048		544.478	1016		544.42	863
549.277	1158		549.343	1061		549.35	987		549.349	1033		549.319	1051		549.473	1021		549.416	865
554.274	1152		554.346	1061		554.352	997		554.353	1029		554.325	1049		554.491	1017		554.417	859
559.273	1150		559.345	1060		559.353	988		559.35	1040		559.324	1054		559.492	1017		559.414	859
564.274	1162		564.353	1064		564.354	990		564.357	1045		564.316	1051		564.489	1025		564.419	864
569.277	1159		569.352	1057		569.355	982		569.352	1049		569.332	1052		569.489	1008		569.409	861
574.274	1154		574.331	1058		574.35	991		574.342	1050		574.334	1057		574.491	1016		574.41	871
579.278	1156		579.341	1063		579.359	990		579.341	1048		579.335	1058		579.498	1018		579.415	864
584.278	1164		584.342	1071		584.357	998		584.344	1052		584.333	1060		584.483	1018		584.416	873
589.278	1169		589.345	1060		589.356	999		589.347	1071		589.332	1064		589.471	1020		589.42	869
594.283	1160		594.337	1072		594.362	988		594.343	1067		594.334	1067		594.469	1020		594.413	865
599.281	1168		599.34	1068		599.359	1000		599.344	1069		599.338	1065		599.488	1017		599.413	876
604.276	1162		604.345	1064		604.356	997		604.347	1070		604.33	1066		604.476	1032		604.417	873
609.285	1170		609.344	1072		609.36	995		609.349	1077		609.334	1086		609.476	1017		609.423	883
614.284	1161		614.348	1075		614.357	1008		614.343	1087		614.333	1083		614.477	1025		614.402	875
619.284	1161		619.353	1069		619.361	1000		619.337	1081		619.34	1083		619.488	1032		619.402	868
624.281	1165		624.356	1080		624.357	1005		624.342	1098		624.336	1094		624.479	1026		624.406	877
629.285	1165		629.357	1075		629.352	1003		629.342	1093		629.34	1090		629.476	1026		629.408	875
634.291	1173		634.359	1080		634.354	1001		634.344	1105		634.338	1096		634.487	1029		634.409	880
639.295	1175		639.36	1085		639.353	1001		639.34	1103		639.339	1096		639.484	1029		639.407	890
644.286	1174		644.36	1080		644.362	998		644.342	1112		644.345	1105		644.49	1028		644.427	889
649.288	1184		649.363	1077		649.353	1004		649.342	1120		649.345	1114		649.491	1034		649.421	877
654.288	1172		654.362	1082		654.357	1013		654.348	1123		654.344	1106		654.461	1036		654.424	882
659.292	1185		659.361	1081		659.357	1000		659.353	1133		659.34	1126		659.476	1028		659.438	886
664.293	1179		664.362	1085		664.359	1008		664.347	1132		664.35	1121		664.468	1038		664.419	891
669.292	1180		669.364	1086		669.369	1011		669.353	1146		669.356	1130		669.456	1029		669.435	892
674.297	1181		674.365	1082		674.366	1005		674.351	1148		674.344	1131		674.469	1033		674.432	890
679.297	1175		679.366	1082		679.364	1010		679.352	1154		679.345	1139		679.463	1033		679.444	885
684.297	1182		684.362	1091		684.364	1010		684.353	1162		684.349	1148		684.466	1047		684.435	894
689.29	1180		689.366	1087		689.37	1014		689.349	1170		689.351	1158		689.463	1042		689.438	891
694.297	1180		694.365	1094		694.369	1010		694.352	1172		694.359	1152		694.471	1035		694.45	895
699.302	1185		699.364	1094		699.369	1012		699.351	1180		699.358	1164		699.476	1036		699.449	889
704.303	1189		704.369	1090		704.369	1015		704.357	1187		704.354	1169		704.479	1040		704.445	897
709.301	1185		709.366	1091		709.372	1014		709.354	1197		709.355	1172		709.481	1035		709.435	896
714.292	1192		714.368	1097		714.374	1024		714.358	1215		714.356	1179		714.476	1044		714.432	898
719.303	1193		719.369	1086		719.375	1019		719.362	1215		719.365	1186		719.483	1051		719.446	903
724.304	1187		724.372	1091		724.367	1012		724.364	1228		724.359	1188		724.491	1046		724.445	905
729.305	1201		729.374	1093		729.375	1025		729.359	1232		729.356	1199		729.493	1043		729.442	897
734.297	1185		734.373	1100		734.377	1019		734.359	1243		734.357	1217		734.492	1050		734.449	904
739.31	1196		739.374	1097		739.378	1030		739.356	1254		739.356	1220		739.502	1054		739.451	901
744.315	1203		744.374	1101		744.372	1028		744.37	1265		744.362	1235		744.505	1056		744.455	910
749.317	1195		749.377	1102		749.375	1027		749.37	1271		749.361	1239		749.497	1055		749.452	911
754.314	1207		754.374	1099		754.382	1031		754.362	1280		754.345	1246		754.505	1052		754.457	911
759.319	1201		759.377	1097		759.386	1024		759.368	1295		759.348	1252		759.504	1061		759.467	916
764.321	1205		764.38	1105		764.363	1027		764.372	1296		764.351	1260		764.518	1056		764.474	913
769.324	1206		769.378	1108		769.371	1034		769.375	1320		769.354	1277		769.513	1056		769.459	914
774.322	1213		774.385	1104		774.374	1030		774.379	1323		774.348	1284		774.511	1056		774.449	910
779.319	1202		779.366	1104		779.374	1031		779.37	1336		779.352	1297		779.519	1061		779.465	918
784.321	1211		784.358	1111		784.374	1035		784.382	1343		784.356	1306		784.52	1062		784.461	922
789.327	1204		789.355	1111		789.372	1032		789.378	1349		789.357	1310		789.532	1076		789.469	924
794.324	1218		794.369	1109		794.372	1029		794.382	1361		794.353	1336		794.514	1075		794.468	925
799.326	1222		799.345	1115		799.377	1030		799.374	1385		799.352	1335		799.521	1071		799.476	917
804.324	1220		804.349	1108		804.381	1037		804.393	1393		804.361	1344		804.525	1071		804.468	926
809.323	1226		809.344	1113		809.37	1044		809.389	1409		809.362	1359		809.525	1070		809.485	923
814.325	1221		814.348	1114		814.379	1038		814.395	1422		814.366	1371		814.533	1078		814.467	928
819.325	1226		819.353	1110		819.38	1046		819.396	1431		819.359	1391		819.526	1069		819.47	926
824.328	1221		824.348	1111		824.391	1038		824.397	1444		824.365	1397		824.532	1070		824.483	941
829.328	1230		829.347	1109		829.38	1037		829.4	1454		829.373	1409		829.531	1083		829.487	936
834.329	1220		834.352	1112		834.383	1047		834.402	1479		834.369	1416		834.536	1078		834.485	930
839.331	1226		839.357	1115		839.395	1042		839.403	1478		839.364	1442		839.529	1081		839.476	935
844.335	1227		844.357	1122		844.395	1039		844.401	1493		844.368	1450		844.545	1080		844.475	931
849.333	1232		849.356	1117		849.395	1053		849.381	1517		849.372	1465		849.556	1080		849.475	937
854.333	1229		854.356	1121		854.389	1042		854.387	1524		854.372	1473		854.559	1095		854.485	950
859.332	1229		859.356	1120		859.389	1049		859.386	1547		859.387	1491		859.546	1095		859.486	942
864.34	1230		864.36	1127		864.4	1052		864.385	1553		864.365	1509		864.537	1097		864.487	948
869.33	1233		869.357	1122		869.397	1046		869.385	1567		869.372	1518		869.554	1093		869.5	953
874.335	1235		874.358	1118		874.396	1050		874.387	1584		874.381	1542		874.568	1095		874.485	955
879.335	1232		879.361	1129		879.393	1049		879.394	1601		879.388	1548		879.562	1100		879.479	955
884.337	1236		884.367	1137		884.398	1054		884.388	1614		884.384	1573		884.555	1093		884.479	951
889.335	1246		889.37	1128		889.401	1052		889.397	1636		889.38	1591		889.571	1108		889.486	960
894.341	1234		894.362	1130		894.402	1056		894.392	1652		894.388	1607		894.569	1099		894.472	959
899.33	1229		899.367	1134		899.398	1056		899.393	1669		899.391	1619		899.56	1109		899.47	952
904.328	1234		904.366	1131		904.397	1061		904.393	1676		904.389	1626		904.562	1109		904.461	959
909.338	1245		909.373	1137		909.402	1061		909.393	1702		909.387	1640		909.572	1113		909.475	962
914.333	1240		914.367	1136		914.402	1062		914.393	1716		914.391	1668		914.575	1105		914.467	963
919.333	1249		919.369	1136		919.411	1066		919.392	1732		919.396	1678		919.574	1116		919.468	975
924.335	1238		924.37	1140		924.402	1063		924.396	1751		924.394	1689		924.576	1113		924.454	956
929.342	1238		929.376	1131		929.405	1062		929.4	1757		929.392	1719		929.574	1120		929.457	965
934.326	1239		934.374	1135		934.405	1060		934.404	1772		934.392	1732		934.591	1124		934.467	974
939.322	1239		939.368	1136		939.401	1069		939.396	1791		939.392	1752		939.587	1122		939.461	978
944.326	1240		944.375	1133		944.409	1069		944.398	1810		944.394	1770		944.587	1128		944.461	975
949.323	1240		949.379	1146		949.408	1072		949.396	1829		949.39	1790		949.595	1135		949.458	982
954.325	1235		954.384	1153		954.408	1077		954.394	1842		954.389	1797		954.592	1131		954.469	981
959.329	1251		959.375	1143		959.401	1072		959.406	1845		959.395	1808		959.596	1130		959.469	981
964.326	1239		964.378	1143		964.408	1080		964.394	1869		964.395	1836		964.603	1129		964.483	992
969.33	1244		969.38	1151		969.409	1081		969.391	1893		969.397	1855		969.599	1130		969.476	987
974.328	1241		974.384	1158		974.411	1079		974.393	1897		974.397	1871		974.6	1130		974.473	991
979.334	1249		979.393	1155		979.41	1083		979.401	1927		979.392	1880		979.6	1136		979.484	987
984.331	1255		984.394	1151		984.409	1074		984.396	1934		984.398	1902		984.597	1138		984.481	992
989.333	1251		989.386	1161		989.412	1088		989.396	1945		989.399	1924		989.588	1136		989.485	999
994.34	1253		994.397	1149		994.41	1084		994.393	1964		994.405	1938		994.586	1148		994.481	998
999.341	1251		999.398	1160		999.409	1094		999.402	1970		999.407	1963		999.577	1151		999.488	1007
1004.34	1237		1004.39	1150		1004.41	1091		1004.41	1985		1004.41	1989		1004.57	1150		1004.5	1005
1009.34	1253		1009.39	1149		1009.41	1097		1009.38	2002		1009.41	1988		1009.58	1163		1009.51	1000
1014.34	1255		1014.4	1168		1014.41	1088		1014.38	2025		1014.4	2002		1014.58	1160		1014.5	1016
1019.34	1251		1019.4	1156		1019.41	1083		1019.38	2035		1019.41	2027		1019.59	1165		1019.5	1022
1024.35	1259		1024.4	1164		1024.42	1098		1024.39	2057		1024.4	2049		1024.6	1162		1024.5	1022
1029.34	1256		1029.4	1171		1029.42	1099		1029.39	2056		1029.4	2071		1029.6	1166		1029.5	1018
1034.34	1259		1034.4	1169		1034.42	1093		1034.39	2093		1034.4	2082		1034.61	1173		1034.52	1025
1039.34	1257		1039.4	1179		1039.42	1105		1039.39	2093		1039.4	2097		1039.61	1179		1039.5	1025
1044.35	1258		1044.4	1174		1044.42	1100		1044.39	2115		1044.41	2096		1044.6	1171		1044.51	1025
1049.35	1263		1049.41	1171		1049.41	1099		1049.4	2127		1049.4	2126		1049.61	1185		1049.51	1032
1054.34	1263		1054.4	1177		1054.42	1106		1054.39	2155		1054.4	2141		1054.61	1180		1054.52	1040
1059.35	1260		1059.4	1172		1059.42	1102		1059.39	2162		1059.4	2160		1059.62	1188		1059.52	1043
1064.35	1257		1064.4	1171		1064.42	1109		1064.39	2160		1064.41	2177		1064.62	1188		1064.51	1039
1069.35	1261		1069.41	1176		1069.42	1118		1069.4	2169		1069.41	2193		1069.62	1185		1069.52	1054
1074.35	1264		1074.4	1171		1074.43	1116		1074.4	2204		1074.41	2222		1074.62	1191		1074.52	1043
1079.36	1271		1079.4	1175		1079.43	1116		1079.39	2205		1079.41	2230		1079.63	1191		1079.52	1051
1084.36	1262		1084.41	1185		1084.42	1114		1084.4	2212		1084.41	2246		1084.63	1202		1084.52	1061
1089.36	1267		1089.4	1183		1089.42	1115		1089.41	2235		1089.42	2266		1089.63	1198		1089.52	1060
1094.36	1274		1094.41	1181		1094.43	1122		1094.4	2236		1094.41	2283		1094.63	1206		1094.53	1064
1099.35	1261		1099.41	1200		1099.43	1119		1099.38	2246		1099.41	2287		1099.64	1210		1099.53	1072
1104.35	1274		1104.41	1191		1104.44	1123		1104.38	2262		1104.41	2311		1104.64	1219		1104.53	1078
1109.35	1273		1109.41	1186		1109.43	1124		1109.39	2280		1109.42	2308		1109.63	1212		1109.54	1078
1114.36	1266		1114.41	1187		1114.43	1127		1114.39	2300		1114.42	2332		1114.64	1219		1114.54	1076
1119.35	1267		1119.41	1192		1119.43	1129		1119.39	2302		1119.42	2341		1119.65	1215		1119.55	1086
1124.35	1277		1124.41	1195		1124.44	1138		1124.39	2312		1124.42	2369		1124.64	1215		1124.56	1090
1129.36	1279		1129.4	1199		1129.43	1132		1129.39	2328		1129.43	2380		1129.65	1220		1129.55	1100
1134.36	1281		1134.41	1191		1134.43	1145		1134.39	2349		1134.43	2395		1134.65	1235		1134.54	1098
1139.36	1281		1139.42	1194		1139.44	1142		1139.39	2340		1139.42	2401		1139.66	1234		1139.55	1103
1144.35	1284		1144.41	1205		1144.44	1136		1144.38	2365		1144.42	2414		1144.66	1240		1144.55	1108
1149.36	1290		1149.41	1197		1149.44	1145		1149.39	2362		1149.42	2433		1149.66	1243		1149.55	1106
1154.36	1282		1154.4	1196		1154.44	1144		1154.4	2393		1154.43	2448		1154.67	1238		1154.55	1112
1159.36	1281		1159.41	1199		1159.43	1145		1159.41	2398		1159.43	2469		1159.67	1245		1159.56	1117
1164.36	1288		1164.4	1202		1164.43	1150		1164.4	2409		1164.43	2481		1164.67	1249		1164.56	1127
1169.36	1295		1169.4	1210		1169.43	1149		1169.4	2404		1169.43	2493		1169.67	1260		1169.56	1123
1174.36	1298		1174.4	1205		1174.43	1161		1174.41	2434		1174.44	2496		1174.67	1257		1174.56	1138
1179.36	1290		1179.4	1212		1179.44	1160		1179.41	2442		1179.44	2503		1179.67	1263		1179.56	1137
1184.37	1290		1184.4	1214		1184.44	1162		1184.41	2436		1184.43	2509		1184.69	1269		1184.57	1134
1189.36	1293		1189.4	1221		1189.44	1158		1189.41	2456		1189.44	2525		1189.68	1273		1189.58	1140
1194.36	1300		1194.4	1213		1194.44	1164		1194.41	2482		1194.44	2562		1194.68	1274		1194.58	1152
1199.37	1304		1199.4	1216		1199.44	1172		1199.41	2468		1199.44	2568		1199.69	1287		1199.57	1154
1204.36	1300		1204.4	1214		1204.45	1160		1204.41	2489		1204.44	2566		1204.69	1288		1204.57	1159
1209.37	1306		1209.4	1221		1209.45	1174		1209.41	2488		1209.44	2569		1209.71	1285		1209.57	1168
1214.37	1291		1214.4	1220		1214.45	1172		1214.41	2494		1214.44	2602		1214.7	1293		1214.57	1170
1219.37	1304		1219.4	1220		1219.45	1177		1219.41	2520		1219.45	2597		1219.7	1293		1219.57	1175
1224.37	1305		1224.42	1218		1224.45	1185		1224.41	2516		1224.45	2615		1224.72	1300		1224.57	1178
1229.37	1302		1229.41	1223		1229.45	1183		1229.41	2521		1229.45	2615		1229.71	1299		1229.58	1187
1234.37	1299		1234.41	1223		1234.45	1178		1234.41	2539		1234.46	2637		1234.72	1306		1234.57	1191
1239.37	1311		1239.41	1220		1239.45	1181		1239.41	2551		1239.46	2642		1239.72	1313		1239.57	1186
1244.37	1303		1244.41	1230		1244.45	1187		1244.41	2557		1244.46	2648		1244.71	1322		1244.57	1182
1249.37	1312		1249.42	1225		1249.45	1184		1249.42	2566		1249.46	2659		1249.74	1325		1249.58	1204
1254.37	1304		1254.42	1237		1254.45	1183		1254.42	2577		1254.45	2663		1254.72	1326		1254.56	1216
1259.37	1316		1259.41	1237		1259.45	1182		1259.42	2581		1259.46	2680		1259.72	1331		1259.57	1223
1264.37	1317		1264.42	1230		1264.45	1178		1264.42	2603		1264.46	2697		1264.72	1334		1264.57	1224
1269.37	1308		1269.42	1228		1269.45	1198		1269.42	2594		1269.47	2696		1269.74	1333		1269.57	1237
1274.38	1313		1274.42	1235		1274.45	1203		1274.42	2602		1274.47	2698		1274.72	1344		1274.57	1234
1279.37	1316		1279.42	1254		1279.46	1198		1279.43	2602		1279.46	2701		1279.72	1340		1279.57	1241
1284.37	1317		1284.42	1239		1284.45	1201		1284.42	2626		1284.47	2718		1284.73	1352		1284.58	1247
1289.37	1317		1289.42	1250		1289.46	1200		1289.42	2625		1289.47	2733		1289.73	1357		1289.58	1261
1294.37	1311		1294.43	1248		1294.46	1214		1294.42	2623		1294.47	2751		1294.73	1352		1294.59	1263
1299.38	1319		1299.43	1253		1299.46	1211		1299.41	2633		1299.47	2735		1299.73	1362		1299.59	1263
1304.37	1326		1304.42	1243		1304.46	1200		1304.41	2643		1304.47	2752		1304.74	1381		1304.6	1267
1309.37	1332		1309.42	1253		1309.47	1211		1309.42	2649		1309.47	2757		1309.74	1375		1309.6	1270
1314.37	1328		1314.43	1257		1314.46	1214		1314.42	2661		1314.47	2754		1314.74	1380		1314.59	1282
1319.38	1320		1319.43	1250		1319.46	1214		1319.42	2662		1319.47	2768		1319.74	1382		1319.6	1291
1324.38	1322		1324.43	1252		1324.46	1219		1324.42	2665		1324.47	2795		1324.74	1385		1324.61	1296
1329.38	1323		1329.43	1245		1329.46	1218		1329.42	2668		1329.47	2791		1329.74	1394		1329.6	1294
1334.38	1345		1334.44	1261		1334.46	1219		1334.42	2674		1334.47	2804		1334.75	1406		1334.61	1315
1339.38	1334		1339.44	1259		1339.46	1223		1339.42	2670		1339.46	2807		1339.75	1399		1339.6	1313
1344.39	1330		1344.45	1254		1344.46	1240		1344.42	2689		1344.46	2807		1344.74	1407		1344.61	1315
1349.38	1328		1349.44	1265		1349.47	1228		1349.43	2697		1349.46	2826		1349.73	1419		1349.62	1323
1354.38	1330		1354.45	1262		1354.47	1222		1354.43	2689		1354.46	2813		1354.75	1414		1354.62	1328
1359.38	1338		1359.45	1264		1359.46	1240		1359.42	2699		1359.46	2826		1359.74	1423		1359.61	1334
1364.39	1328		1364.45	1262		1364.46	1232		1364.43	2703		1364.46	2833		1364.75	1426		1364.61	1343
1369.39	1340		1369.44	1269		1369.46	1238		1369.43	2723		1369.46	2846		1369.76	1424		1369.62	1347
1374.38	1339		1374.45	1275		1374.47	1239		1374.43	2720		1374.47	2855		1374.76	1429		1374.62	1352
1379.39	1336		1379.45	1269		1379.46	1246		1379.43	2716		1379.45	2848		1379.75	1444		1379.62	1365
1384.39	1336		1384.45	1274		1384.47	1249		1384.43	2740		1384.46	2863		1384.75	1448		1384.63	1375
1389.39	1334		1389.46	1278		1389.47	1246		1389.43	2739		1389.46	2871		1389.76	1455		1389.62	1374
1394.39	1332		1394.45	1277		1394.47	1253		1394.44	2743		1394.46	2869		1394.76	1450		1394.63	1387
1399.39	1341		1399.46	1279		1399.47	1250		1399.43	2739		1399.46	2867		1399.76	1460		1399.62	1392
1404.4	1343		1404.45	1280		1404.47	1248		1404.43	2742		1404.46	2879		1404.75	1473		1404.62	1400
1409.4	1347		1409.46	1291		1409.47	1263		1409.44	2759		1409.47	2878		1409.77	1467		1409.62	1398
1414.39	1341		1414.46	1281		1414.47	1266		1414.44	2748		1414.46	2879		1414.77	1474		1414.63	1412
1419.38	1347		1419.46	1286		1419.48	1267		1419.44	2765		1419.46	2888		1419.78	1486		1419.63	1407
1424.38	1350		1424.45	1292		1424.47	1261		1424.44	2744		1424.47	2893		1424.77	1479		1424.63	1410
1429.38	1351		1429.46	1291		1429.47	1270		1429.44	2756		1429.47	2903		1429.78	1488		1429.63	1424
1434.38	1349		1434.46	1293		1434.47	1274		1434.45	2782		1434.47	2920		1434.78	1492		1434.62	1429
1439.38	1351		1439.46	1297		1439.48	1278		1439.45	2766		1439.47	2919		1439.77	1495		1439.62	1448
1444.39	1341		1444.46	1291		1444.48	1276		1444.44	2785		1444.47	2903		1444.77	1506		1444.62	1447
1449.39	1353		1449.47	1296		1449.48	1274		1449.44	2781		1449.47	2909		1449.77	1509		1449.63	1457
1454.4	1348		1454.46	1288		1454.48	1279		1454.44	2780		1454.47	2921		1454.78	1515		1454.63	1458
1459.4	1350		1459.46	1306		1459.48	1290		1459.45	2798		1459.47	2928		1459.79	1518		1459.63	1473
1464.4	1361		1464.46	1308		1464.49	1289		1464.45	2787		1464.47	2929		1464.79	1526		1464.64	1477
1469.4	1363		1469.46	1303		1469.49	1282		1469.45	2782		1469.47	2938		1469.79	1530		1469.65	1475
1474.4	1352		1474.46	1316		1474.48	1293		1474.45	2790		1474.48	2921		1474.79	1522		1474.65	1484
1479.4	1358		1479.46	1319		1479.49	1287		1479.45	2797		1479.48	2941		1479.79	1537		1479.65	1490
1484.39	1364		1484.46	1311		1484.49	1299		1484.46	2800		1484.48	2943		1484.77	1540		1484.64	1496
1489.4	1364		1489.47	1308		1489.49	1297		1489.45	2796		1489.48	2943		1489.77	1537		1489.64	1504
1494.39	1365		1494.45	1316		1494.48	1290		1494.45	2812		1494.48	2955		1494.8	1553		1494.65	1521
1499.39	1358		1499.46	1321		1499.49	1304		1499.47	2816		1499.48	2950		1499.8	1554		1499.66	1513
1504.39	1367		1504.47	1328		1504.5	1305		1504.47	2825		1504.48	2934		1504.79	1558		1504.67	1532
1509.39	1364		1509.47	1323		1509.5	1296		1509.47	2813		1509.48	2938		1509.78	1564		1509.65	1528
1514.39	1373		1514.46	1337		1514.5	1305		1514.47	2833		1514.48	2962		1514.79	1571		1514.64	1548
1519.39	1367		1519.46	1334		1519.49	1308		1519.47	2829		1519.48	2960		1519.79	1586		1519.65	1562
1524.39	1368		1524.47	1339		1524.49	1310		1524.48	2816		1524.49	2958		1524.8	1578		1524.65	1552
1529.39	1384		1529.47	1328		1529.5	1310		1529.48	2838		1529.48	2966		1529.79	1585		1529.65	1559
1534.39	1361		1534.45	1324		1534.51	1315		1534.47	2827		1534.49	2967		1534.79	1585		1534.65	1569
1539.39	1364		1539.45	1335		1539.49	1315		1539.47	2832		1539.49	2971		1539.81	1600		1539.66	1571
1544.39	1369		1544.45	1351		1544.51	1313		1544.48	2822		1544.49	2967		1544.82	1608		1544.65	1584
1549.4	1373		1549.45	1342		1549.51	1322		1549.47	2840		1549.48	2954		1549.79	1611		1549.66	1592
1554.39	1385		1554.45	1344		1554.51	1326		1554.47	2842		1554.49	2963		1554.81	1614		1554.65	1595
1559.4	1373		1559.45	1346		1559.51	1317		1559.48	2834		1559.49	2976		1559.81	1625		1559.65	1589
1564.39	1370		1564.44	1343		1564.52	1330		1564.48	2833		1564.5	2981		1564.81	1632		1564.65	1606
1569.4	1382		1569.45	1348		1569.51	1328		1569.48	2843		1569.49	2975		1569.82	1633		1569.66	1627
1574.4	1380		1574.44	1351		1574.5	1334		1574.47	2828		1574.49	2979		1574.81	1639		1574.65	1620
1579.4	1386		1579.44	1353		1579.5	1332		1579.48	2850		1579.51	2962		1579.82	1651		1579.65	1631
1584.4	1384		1584.44	1343		1584.5	1328		1584.48	2844		1584.51	2996		1584.83	1653		1584.66	1632
1589.4	1384		1589.44	1359		1589.5	1327		1589.48	2841		1589.51	2997		1589.83	1658		1589.66	1651
1594.4	1377		1594.45	1358		1594.5	1322		1594.48	2848		1594.51	2987		1594.82	1664		1594.66	1659
1599.4	1389		1599.44	1364		1599.5	1338		1599.48	2858		1599.51	2967		1599.83	1670		1599.66	1662
1604.4	1390		1604.44	1358		1604.5	1335		1604.48	2827		1604.51	2989		1604.83	1664		1604.65	1678
1609.39	1381		1609.45	1364		1609.5	1338		1609.48	2859		1609.51	2995		1609.83	1669		1609.67	1677
1614.4	1393		1614.45	1363		1614.5	1343		1614.47	2847		1614.51	2987		1614.83	1685		1614.66	1682
1619.4	1387		1619.45	1370		1619.5	1333		1619.47	2861		1619.51	2983		1619.83	1685		1619.65	1680
1624.39	1389		1624.44	1367		1624.5	1345		1624.47	2860		1624.52	2979		1624.82	1691		1624.65	1690
1629.39	1389		1629.45	1376		1629.51	1343		1629.47	2860		1629.51	2997		1629.82	1682		1629.66	1699
1634.4	1379		1634.45	1371		1634.5	1357		1634.47	2857		1634.51	2981		1634.82	1701		1634.66	1706
1639.4	1391		1639.46	1378		1639.5	1351		1639.47	2856		1639.51	2998		1639.8	1708		1639.65	1715
1644.4	1387		1644.45	1367		1644.5	1348		1644.47	2844		1644.51	3004		1644.81	1705		1644.65	1719
1649.4	1396		1649.46	1384		1649.51	1364		1649.46	2868		1649.51	2995		1649.82	1719		1649.66	1728
1654.4	1387		1654.46	1386		1654.5	1351		1654.46	2870		1654.51	2992		1654.82	1720		1654.66	1724
1659.4	1383		1659.46	1390		1659.51	1361		1659.45	2869		1659.51	3000		1659.82	1721		1659.67	1729
1664.4	1402		1664.46	1386		1664.51	1366		1664.44	2865		1664.51	3008		1664.83	1731		1664.66	1742
1669.4	1405		1669.45	1386		1669.51	1360		1669.44	2870		1669.52	2999		1669.82	1728		1669.66	1749
1674.4	1400		1674.46	1399		1674.5	1359		1674.44	2863		1674.52	2990		1674.82	1744		1674.66	1760
1679.41	1396		1679.46	1397		1679.5	1367		1679.44	2855		1679.52	3008		1679.82	1748		1679.67	1762
1684.39	1401		1684.46	1396		1684.51	1365		1684.45	2868		1684.52	2994		1684.82	1756		1684.66	1774
1689.39	1399		1689.46	1394		1689.5	1381		1689.43	2858		1689.52	2981		1689.83	1762		1689.66	1771
1694.38	1396		1694.47	1388		1694.51	1372		1694.43	2869		1694.52	3007		1694.82	1764		1694.67	1775
1699.39	1400		1699.48	1388		1699.5	1380		1699.43	2867		1699.52	2997		1699.82	1767		1699.68	1786
1704.39	1399		1704.48	1398		1704.5	1372		1704.43	2874		1704.53	3006		1704.82	1770		1704.67	1790
1709.4	1403		1709.48	1405		1709.5	1381		1709.44	2875		1709.52	3014		1709.82	1786		1709.67	1800
1714.39	1404		1714.47	1406		1714.49	1380		1714.43	2866		1714.53	3002		1714.82	1776		1714.67	1808
1719.39	1400		1719.48	1400		1719.5	1377		1719.43	2874		1719.53	3009		1719.82	1790		1719.67	1803
1724.39	1398		1724.48	1400		1724.49	1375		1724.44	2879		1724.53	3004		1724.82	1796		1724.68	1826
1729.4	1404		1729.48	1408		1729.49	1392		1729.44	2872		1729.53	3015		1729.82	1790		1729.68	1822
1734.39	1405		1734.48	1408		1734.49	1391		1734.44	2875		1734.53	3001		1734.82	1805		1734.68	1836
1739.4	1406		1739.48	1412		1739.49	1379		1739.44	2859		1739.52	3017		1739.83	1808		1739.68	1833
1744.4	1404		1744.48	1415		1744.5	1380		1744.44	2863		1744.52	3009		1744.82	1823		1744.69	1842
1749.4	1404		1749.48	1418		1749.49	1392		1749.45	2868		1749.53	3020		1749.82	1819		1749.69	1847
1754.4	1410		1754.48	1417		1754.49	1384		1754.44	2866		1754.53	2994		1754.8	1821		1754.68	1859
1759.4	1404		1759.48	1408		1759.5	1395		1759.45	2872		1759.52	3017		1759.81	1822		1759.69	1849
1764.4	1413		1764.48	1412		1764.5	1392		1764.44	2872		1764.53	3008		1764.8	1837		1764.68	1866
1769.4	1411		1769.49	1424		1769.5	1399		1769.45	2876		1769.53	2998		1769.82	1840		1769.69	1875
1774.41	1404		1774.48	1426		1774.5	1404		1774.45	2864		1774.53	3004		1774.8	1850		1774.69	1878
1779.4	1420		1779.49	1431		1779.5	1401		1779.45	2859		1779.53	3001		1779.81	1849		1779.69	1869
1784.41	1411		1784.49	1432		1784.51	1404		1784.45	2859		1784.54	2980		1784.81	1847		1784.69	1894
1789.41	1415		1789.49	1423		1789.51	1403		1789.45	2870		1789.53	2997		1789.82	1850		1789.69	1891
1794.42	1413		1794.49	1430		1794.5	1399		1794.45	2865		1794.54	2992		1794.82	1861		1794.69	1885
