# Supplementary material for: The intrinsically disordered cytoplasmic tail of a dendrite branching receptor uses two distinct mechanisms to regulate the actin cytoskeleton
Source: eLife journal article supplement (doi:10.7554/elife.88492), 2023-07-17
Supplement: fig5-figsupp1-data2 [file Figure 5 - figure supplement 1C Source Data.xlsx]

## Sheet: Sheet1
NOTE: values under the sample name denote RFU
time (s)	G-actin #1	G-actin #2	G-actin + F/F #1	G-actin + F/F #2		F-actin #1	F-actin #2	F-actin + F/F #1	F-actin + F/F #2
0	745	688	1039	1037		7082	7184	7369	8664
4.407	758	697	1035	1040		7198	7375	7186	8534
9.424	754	690	1039	1051		7180	7375	7303	8421
14.431	763	697	1044	1047		7201	7434	7354	8279
19.428	763	689	1043	1037		7167	7465	6979	8134
24.435	761	691	1048	1046		7132	7449	6996	8068
29.439	762	691	1044	1048		7128	7436	7017	8013
34.449	759	694	1043	1044		7044	7255	6857	8028
39.445	762	692	1050	1050		7031	7217	6937	7941
44.457	766	694	1046	1042		7032	7191	6918	7802
49.461	771	693	1056	1056		7017	7288	7186	7748
54.461	762	692	1058	1058		7053	7460	7322	7702
59.469	765	694	1056	1061		7019	7679	7088	7630
64.472	766	685	1060	1063		6966	7718	6985	7577
69.473	767	693	1066	1054		6976	7733	7013	7597
74.489	770	692	1064	1068		6998	7689	7078	7583
79.493	770	696	1060	1067		6976	7733	6972	7569
84.49	763	683	1061	1069		6963	7783	7167	7587
89.493	755	685	1067	1072		6946	7653	7193	7474
94.507	765	689	1073	1070		6965	7534	7275	7457
99.511	762	688	1079	1066		7010	7449	7287	7349
104.508	765	683	1082	1073		7010	7409	7313	7301
109.514	758	691	1077	1084		6982	7392	7301	7240
114.523	760	696	1085	1085		6997	7456	7284	7297
119.514	759	688	1089	1085		6998	7494	7342	7295
124.525	769	686	1092	1076		6972	7486	7346	7332
129.525	766	685	1080	1082		6972	7541	7470	7296
134.534	764	687	1084	1077		6988	7672	7297	7349
139.54	763	686	1093	1090		6974	7754	7492	7334
144.543	752	689	1087	1092		6981	7889	7559	7432
149.543	760	684	1101	1100		6976	7970	7335	7578
154.54	759	677	1095	1083		7000	8005	7453	7441
159.555	758	690	1106	1094		7006	7989	7569	7324
164.553	758	689	1104	1092		6985	7986	7517	7204
169.553	761	683	1110	1089		6997	8063	7619	7121
174.553	761	677	1106	1100		6988	8058	7627	6857
179.561	761	679	1106	1097		7000	7992	7617	6712
184.58	752	689	1113	1103		7042	7990	7656	6449
189.582	759	685	1113	1098		6998	7927	7856	6419
194.581	757	685	1110	1109		7004	7924	7960	6436
199.594	759	679	1103	1105		7008	7902	7994	6441
204.595	759	677	1117	1099		6957	7855	8070	6467
209.598	760	675	1117	1103		6981	7802	8130	6485
214.595	751	675	1121	1109		6992	7839	8212	6570
219.595	752	678	1113	1113		6989	7855	8357	6586
224.601	762	674	1125	1114		6995	7869	8354	6620
229.609	749	672	1121	1110		7000	7899	8299	6616
234.61	745	679	1121	1110		7007	7912	8192	6492
239.613	751	677	1127	1115		7017	7946	8154	6629
244.624	750	677	1124	1118		7014	7916	8154	6766
249.62	750	669	1119	1127		7005	7940	8277	6765
254.616	760	672	1123	1128		6992	7927	8236	6759
259.622	755	672	1128	1121		6984	7945	8203	6614
264.641	745	674	1130	1116		7032	7926	8192	6621
269.647	755	677	1133	1118		6981	7936	8212	6739
274.642	750	675	1131	1117		7002	7990	8129	6632
279.641	750	673	1128	1113		7027	8013	8109	6706
284.649	749	675	1134	1127		7037	7901	7987	6695
289.657	744	673	1146	1123		7069	7856	7925	6902
294.659	754	669	1131	1121		7013	7858	7832	6941
299.661	751	674	1140	1127		7056	7847	7757	6844
304.67	747	674	1136	1126		7012	7809	7608	6900
309.669	743	666	1136	1131		7025	7788	8005	7012
314.675	751	682	1136	1127		7047	7825	7449	6945
319.681	754	674	1143	1131		7045	7823	7371	6911
324.681	747	681	1135	1129		7045	7795	7372	6811
329.693	747	666	1139	1122		7043	7742	7195	6955
334.691	751	673	1146	1134		7047	7750	7108	7054
339.695	745	666	1141	1138		7060	7690	6989	7005
344.693	741	667	1146	1138		7066	7700	6969	7093
349.69	752	668	1150	1128		7046	7676	7065	7076
354.687	759	674	1155	1127		7088	7705	7084	7062
359.696	751	666	1147	1134		7022	7701	7120	7125
364.693	749	665	1154	1144		7041	7719	7090	7269
369.715	740	668	1148	1139		7080	7700	7059	7348
374.714	747	667	1151	1142		7062	7706	7120	7576
379.717	754	670	1142	1143		7063	7657	7215	7580
384.714	751	664	1155	1139		7061	7663	7307	7568
389.721	743	661	1156	1133		7051	7675	7229	7391
394.735	738	661	1156	1148		7071	7662	7332	7282
399.733	744	674	1158	1142		7062	7668	7219	7365
404.732	744	666	1158	1140		7065	7659	7055	7351
409.737	744	664	1159	1140		7087	7666	7052	7463
414.738	749	669	1161	1151		7035	7691	7154	7593
419.746	740	668	1155	1141		7075	7667	7114	7794
424.742	744	666	1155	1146		7082	7683	7129	7682
429.757	743	657	1163	1136		7070	7677	7479	7572
434.764	748	664	1168	1150		7045	7682	7015	7508
439.778	741	667	1164	1160		7054	7645	7056	7271
444.77	744	667	1162	1143		7072	7668	7132	7271
449.773	745	664	1159	1154		7066	7670	7186	7184
454.78	747	657	1164	1163		7036	7674	7260	7142
459.792	745	664	1163	1147		7060	7649	7185	7283
464.787	747	666	1168	1146		7057	7656	7274	7374
469.788	751	659	1175	1153		7077	7661	7223	7362
474.787	737	663	1177	1154		7054	7662	7247	7197
479.806	744	663	1167	1156		7078	7682	7292	6989
484.802	744	672	1174	1154		7085	7675	7228	6911
489.801	740	661	1168	1163		7053	7700	7210	6940
494.804	747	662	1179	1157		7092	7697	7505	7096
499.814	739	668	1172	1162		7060	7615	7513	7020
504.815	741	665	1166	1157		7066	7659	7565	6875
509.818	735	657	1179	1165		7065	7676	7358	6929
514.822	735	662	1177	1155		7055	7657	7306	7095
519.826	745	663	1178	1161		7040	7655	7302	7227
524.829	745	662	1170	1155		7049	7653	7150	7207
529.829	737	657	1174	1156		7039	7643	7237	7191
534.832	743	663	1173	1163		7068	7674	7331	7088
539.833	739	663	1182	1152		7064	7674	7531	7153
544.837	739	657	1180	1157		7048	7632	7938	7133
549.845	740	653	1184	1163		7055	7631	7756	7000
554.848	740	662	1179	1162		7031	7666	7813	6996
559.843	742	661	1182	1165		7063	7649	7646	6971
564.852	741	660	1185	1167		7045	7668	7803	6961
569.83	742	661	1172	1166		7051	7606	7701	7043
574.834	741	655	1182	1167		7050	7662	7778	7039
579.832	743	661	1185	1166		7040	7693	8008	6976
584.844	742	664	1188	1166		7049	7671	7919	6881
589.841	735	660	1187	1158		7038	7658	7841	6949
594.845	734	657	1190	1154		7051	7684	7779	7033
599.845	740	660	1181	1172		7033	7685	7736	6928
604.848	738	666	1187	1171		7038	7653	7681	6905
609.868	731	656	1184	1164		7052	7675	7954	6834
614.85	743	662	1186	1165		7024	7683	7639	6822
619.86	741	660	1185	1168		7045	7688	7522	6956
624.863	737	658	1191	1174		7040	7669	7523	7004
629.864	735	662	1194	1176		7038	7706	7494	7037
634.863	740	660	1184	1174		7047	7685	7674	6980
639.859	740	663	1186	1178		7033	7643	7705	7054
644.87	736	656	1193	1176		7003	7678	7668	7084
649.876	742	657	1195	1187		7050	7688	7890	7168
654.885	743	660	1196	1172		7020	7685	7850	7266
659.882	738	661	1199	1176		7022	7666	7734	7256
664.884	734	657	1202	1184		7008	7674	7840	7019
669.898	733	662	1198	1183		7047	7657	7849	7118
674.904	740	657	1199	1176		7026	7662	7712	7313
679.901	738	657	1194	1191		7026	7657	7579	7278
684.903	731	650	1207	1177		7014	7679	7694	7433
689.911	739	658	1197	1177		7024	7658	7570	7487
694.918	730	655	1196	1177		7017	7631	7080	7473
699.923	740	657	1192	1186		7012	7669	6961	7270
704.926	738	662	1189	1172		7020	7628	6932	7502
709.933	732	655	1196	1180		7005	7677	7021	7493
714.93	737	660	1212	1185		7051	7652	7001	7428
719.933	735	657	1213	1192		7021	7674	6969	7199
724.937	739	655	1206	1193		7042	7659	6998	6968
729.925	742	659	1210	1183		7041	7650	7079	7034
734.933	740	657	1204	1180		7002	7630	7312	7085
739.924	741	651	1208	1186		7054	7634	7394	7118
744.934	745	651	1216	1185		7036	7645	7493	7021
749.94	751	661	1216	1183		7032	7648	7395	7040
754.945	737	659	1220	1191		7026	7616	7319	7043
759.939	742	658	1213	1197		7042	7613	7424	7038
764.953	734	654	1215	1200		7026	7620	7568	7110
769.959	737	660	1218	1186		7028	7607	7608	7217
774.955	742	658	1212	1194		7037	7604	7946	7317
779.96	739	648	1225	1188		7028	7611	7668	7396
784.96	742	651	1208	1191		7023	7622	7553	7243
789.968	740	653	1216	1189		7026	7600	7549	7094
794.973	738	658	1210	1194		7035	7607	7757	7108
799.973	739	655	1218	1188		7023	7629	7820	7046
804.99	744	654	1219	1195		7007	7632	7572	7111
809.993	749	651	1225	1192		7034	7592	7717	7089
814.996	739	655	1224	1197		7001	7610	7820	7212
819.993	737	661	1228	1207		7026	7608	7919	7195
824.991	737	656	1220	1198		7044	7596	7784	7285
829.99	745	662	1224	1198		7039	7603	7777	7261
835.007	742	651	1234	1204		7037	7582	7699	7226
840.009	738	658	1226	1215		7003	7617	7784	7101
845.003	741	655	1228	1210		7007	7584	7969	6984
850.011	737	654	1229	1220		6989	7580	8006	6938
855.018	735	656	1233	1221		7007	7595	8192	6835
860.026	736	646	1234	1218		6997	7605	7995	6755
865.003	742	659	1237	1211		6997	7599	7786	6655
870.003	735	655	1236	1212		7015	7602	7952	6582
875.003	738	651	1238	1221		7020	7608	8127	6748
880.011	735	650	1237	1206		7011	7614	7990	6731
885.008	743	658	1235	1208		7016	7593	7660	7009
890.013	734	652	1244	1203		6988	7592	7513	6900
895.016	745	652	1232	1225		7015	7590	7367	6826
900.015	737	650	1228	1230		7001	7611	7329	6892
905.025	740	650	1235	1234		7001	7569	7121	6946
910.026	747	650	1239	1244		6997	7592	7071	6956
915.021	741	656	1243	1251		6993	7593	6975	6947
920.028	738	661	1242	1260		7035	7563	6922	6768
925.031	736	652	1238	1264		6984	7600	6767	6663
930.036	739	651	1236	1271		6987	7572	6715	6588
935.032	737	656	1245	1273		6995	7579	6718	6526
940.039	742	654	1246	1277		6977	7579	6540	6544
945.034	734	653	1248	1280		7002	7580	6534	6587
950.037	736	656	1230	1287		6979	7560	6743	6618
955.031	734	647	1232	1290		6982	7559	6801	6664
960.018	731	654	1240	1293		6973	7588	6560	6512
965.016	734	654	1247	1289		6977	7536	6407	6389
970.019	739	654	1236	1297		6950	7608	6308	6236
975.024	741	653	1248	1308		6970	7571	6287	6213
980.022	725	652	1243	1310		6983	7567	6330	6285
985.024	732	652	1261	1315		6983	7557	6360	6304
990.028	731	655	1257	1317		6966	7560	6386	6321
995.029	742	654	1250	1322		6963	7567	6456	6338
1000.03	734	655	1251	1359		6992	7547	6315	6430
1005.03	731	648	1257	1358		6946	7565	6333	6420
1010.04	732	655	1249	1374		7008	7588	6383	6281
1015.04	735	646	1249	1378		6958	7536	6226	6272
1020.04	738	654	1253	1381		6951	7538	6380	6234
1025.04	730	648	1247	1387		6970	7527	6398	6181
1030.04	738	653	1250	1390		6973	7542	6292	6192
1035.05	730	649	1252	1383		6966	7555	6477	6133
1040.04	745	654	1242	1380		6951	7557	6702	6166
1045.05	735	650	1253	1381		6939	7551	6721	6219
1050.05	726	656	1265	1372		6967	7576	6907	6265
1055.05	727	655	1254	1383		6972	7547	6990	6152
1060.05	730	647	1253	1363		6955	7536	7042	6030
1065.06	736	650	1242	1377		6948	7542	7129	6068
1070.06	736	648	1241	1371		6973	7526	7196	6015
1075.07	733	655	1253	1366		6942	7556	7291	6159
1080.07	732	650	1263	1369		6935	7571	7426	6139
1085.07	728	647	1264	1366		6930	7554	7530	6101
1090.07	734	649	1258	1362		6967	7546	7576	6102
1095.07	743	649	1252	1354		6907	7539	7612	6069
1100.08	736	647	1255	1353		6943	7564	7616	6108
1105.06	727	654	1268	1345		6931	7543	7587	6089
1110.07	735	651	1261	1345		6929	7519	7628	6230
1115.06	735	659	1259	1351		6913	7525	7652	6303
1120.06	734	651	1257	1356		6939	7535	7524	6252
1125.07	742	656	1254	1344		6935	7527	7365	6184
1130.07	732	651	1263	1339		6902	7526	7429	6149
1135.07	724	657	1265	1332		6926	7532	7414	6076
1140.07	730	650	1261	1342		6902	7503	7298	6047
1145.08	736	658	1272	1339		6925	7537	7315	6101
1150.08	730	651	1272	1345		6939	7579	7287	6121
1155.08	733	647	1266	1342		6919	7525	7138	6138
1160.08	736	648	1267	1340		6888	7529	7157	6027
1165.09	737	650	1256	1325		6902	7530	7182	5974
1170.09	736	649	1271	1315		6893	7533	7221	5910
1175.1	734	653	1271	1320		6917	7521	7066	5938
1180.1	738	649	1267	1321		6892	7498	7376	5992
1185.1	730	658	1280	1311		6905	7502	7197	6075
1190.11	728	645	1278	1320		6901	7523	6996	6117
1195.11	730	648	1284	1320		6915	7486	6834	6125
			2022-08-04 16:11:53	2022-08-04 16:47:54
