# Supplementary material for: The intrinsically disordered cytoplasmic tail of a dendrite branching receptor uses two distinct mechanisms to regulate the actin cytoskeleton
Source: eLife journal article supplement (doi:10.7554/elife.88492), 2023-07-17
Supplement: fig5-figsupp1-data2 [file Figure 5 - figure supplement 1E Source Data.xlsx]

## Sheet: Raw Data
NOTE: values under the sample name denote RFU
time (s)	actin #1	actin #2	actin #3	actin + FFICd #1	actin + FFICd #2	actin + FFICd #3
0	0	0	0	0	0	0
119.493	57	42	42	54	58	52
239.481	178	89	89	90	95	97
359.49	314	170	159	118	126	120
479.481	444	252	247	144	151	146
599.477	623	361	339	172	179	182
719.476	797	474	466	199	214	209
839.47	943	586	601	220	241	260
959.459	1108	710	748	278	281	280
1079.46	1294	870	895	325	341	338
1199.44	1469	1009	1065	373	382	380
1319.43	1637	1165	1228	427	444	456
1439.43	1811	1326	1414	483	505	474
1559.43	1969	1467	1602	548	568	527
1679.41	2153	1579	1775	607	617	586
1799.41	2305	1712	1957	670	676	618
1919.41	2458	1849	2095	699	727	654
2039.4	2596	1964	2260	776	794	714
2159.39	2740	2055	2390	830	879	779
2279.38	2857	2165	2528	857	967	812
2399.37	2992	2271	2636	900	937	871
2519.37	3097	2346	2729	971	1004	892
2639.38	3181	2439	2814	1107	1064	940
2759.35	3304	2503	2880	1195	1106	999
2879.35	3372	2578	2971	1245	1163	1065
2999.35	3459	2624	3059	1256	1224	1088
3119.34	3519	2699	3115	1260	1246	1149
3239.32	3579	2742	3152	1349	1296	1160
3359.32	3628	2775	3199	1409	1347	1210
3479.31	3698	2815	3245	1421	1386	1236
3599.31	3742	2848	3300	1481	1427	1267
3719.3	3762	2895	3321	1550	1485	1286
3839.3	3820	2930	3345	1646	1524	1322
3959.29	3846	2966	3371	1708	1532	1343
4079.3	3870	3016	3391	1733	1588	1357
4199.29	3907	3061	3447	1754	1604	1395
4319.28	3922	3077	3437	1759	1575	1431
4439.29	3926	3109	3465	1710	1535	1468
4559.27	3926	3134	3474	1780	1524	1487
4679.27	3934	3145	3487	1944	1555	1503
4799.27	3949	3188	3528	2069	1601	1530
4919.26	3984	3225	3536	2051	1623	1552
5039.25	3946	3229	3539	2086	1692	1566
5159.26	3944	3207	3546	2116	1763	1571
5279.24	3904	3244	3570	2195	1828	1631
5399.24	3928	3245	3560	2154	1878	1649
5519.24	3904	3236	3583	2133	1878	1682
5639.23	3901	3264	3591	2071	1911	1722
5759.23	3896	3248	3577	1877	1859	1723
5879.23	3873	3255	3578	1833	1845	1763
5999.21	3892	3274	3598	1819	1880	1782
6119.21	3866	3277	3591	1841	1905	1782
6239.21	3848	3295	3592	1868	1928	1813
6359.2	3843	3301	3591	1900	1926	1869
6479.19	3826	3295	3569	1983	1955	1890
6599.2	3824	3297	3592	2066	1972	1905
6719.18	3814	3301	3565	2139	1996	1934
6839.18	3823	3306	3589	2151	2046	1935
6959.18	3802	3310	3586	2191	2073	1956
7079.18	3816	3304	3575	2215	2109	1986
7199.17	3783	3277	3562	2264	2147	2000
7319.18	3791	3282	3571	2332	2152	2030
7439.15	3763	3269	3546	2401	2194	2060
7559.16	3768	3282	3539	2426	2235	2086
7679.16	3724	3281	3566	2452	2244	2083
7799.14	3728	3275	3543	2497	2257	2107
7919.14	3724	3276	3533	2528	2297	2135
8039.15	3727	3260	3525	2682	2296	2185
8159.12	3721	3253	3512	2698	2304	2246
8279.13	3689	3225	3521	2687	2308	2310
8399.12	3685	3252	3522	2637	2295	2361
8519.11	3669	3231	3520	2543	2324	2410
8639.11	3655	3249	3506	2428	2361	2456
8759.12	3637	3238	3509	2397	2344	2493
8879.09	3625	3248	3487	2415	2352	2575
8999.1	3636	3245	3461	2467	2425	2589
9119.1	3621	3233	3472	2546	2462	2583
9239.08	3611	3222	3448	2613	2442	2611
9359.08	3585	3208	3448	2694	2456	2657
9479.09	3571	3216	3447	2658	2634	2645
9599.07	3562	3223	3439	2646	2754	2663
9719.07	3550	3201	3418	2624	2706	2683
9839.07	3523	3205	3410	2599	2596	2650
9959.06	3519	3188	3406	2616	2485	2707
10079	3481	3175	3393	2617	2470	2885
10199	3512	3180	3388	2582	2452	3102
10319	3514	3171	3385	2610	2514	3116
10439	3477	3175	3366	2618	2597	2968
10559	3491	3157	3366	2620	2672	2819
10679	3470	3168	3351	2645	2721	2675
10799	3451	3155	3357	2649	2695	2657
10919	3454	3136	3344	2672	2614	2703
11039	3422	3146	3340	2673	2549	2685
11159	3446	3113	3339	2689	2557	2648
11279	3420	3124	3328	2746	2564	2627
11399	3427	3107	3313	2862	2541	2689
11519	3393	3136	3322	2940	2534	2686
11639	3390	3111	3307	2935	2546	2645
11759	3398	3117	3292	2859	2558	2598
11879	3391	3091	3305	2813	2594	2626
11999	3389	3080	3295	2848	2548	2568
12119	3368	3064	3284	2844	2544	2531
12239	3364	3083	3269	2823	2606	2505
12359	3341	3066	3252	2811	2624	2570
12478.9	3352	3061	3271	2701	2655	2565
12598.9	3341	3057	3234	2690	2717	2618
12718.9	3328	3064	3249	2655	2773	2578
12838.9	3306	3057	3238	2617	2788	2571
12958.9	3309	3039	3231	2607	2769	2566
13078.9	3275	3040	3230	2624	2686	2516
13198.9	3271	3031	3214	2644	2686	2523
13318.9	3289	3017	3205	2662	2689	2592
13438.9	3281	3013	3209	2619	2671	2636
13558.9	3268	3016	3184	2608	2635	2656
13678.9	3297	2981	3196	2554	2660	2666
13798.9	3274	2984	3190	2594	2697	2673
13918.9	3312	2975	3175	2580	2656	2701
14038.9	3269	2963	3174	2554	2650	2675
14158.9	3272	2968	3158	2528	2618	2688
14278.9	3262	2963	3156	2516	2586	2667
14398.9	3277	2954	3125	2517	2552	2660
14518.9	3264	2950	3140	2504	2569	2658
14638.9	3257	2943	3162	2520	2628	2662
14758.9	3248	2921	3122	2512	2702	2658
14878.8	3246	2915	3129	2516	2711	2664
14998.8	3239	2894	3104	2522	2665	2682
15118.8	3222	2907	3105	2513	2663	2664
15238.8	3197	2880	3110	2516	2643	2692
15358.8	3177	2877	3094	2458	2628	2662
15478.8	3166	2880	3093	2474	2608	2670
15598.8	3150	2850	3078	2487	2583	2661
15718.8	3155	2823	3081	2465	2584	2633
15838.8	3122	2822	3052	2475	2567	2650
15958.8	3121	2822	3072	2432	2537	2623
16078.8	3119	2818	3051	2426	2564	2593
16198.8	3079	2811	3044	2425	2525	2576
16318.8	3072	2802	3050	2364	2492	2560
16438.8	3068	2775	3027	2348	2493	2570
16558.8	3039	2756	3028	2336	2481	2537
16678.8	3013	2764	3022	2379	2484	2510
16798.8	3013	2748	2997	2389	2472	2539
16918.8	3002	2733	2996	2343	2454	2555
17038.8	2943	2736	2995	2302	2437	2576
17158.8	2937	2733	2982	2277	2394	2554
17278.8	2889	2722	2973	2280	2385	2594
17398.8	2896	2698	2981	2280	2369	2651
17518.8	2859	2709	2975	2269	2342	2658
17638.7	2826	2686	2951	2241	2317	2680
17758.7	2789	2679	2943	2275	2296	2689
17878.7	2774	2680	2931	2237	2293	2606
17998.7	2743	2660	2930	2220	2280	2554
18118.7	2702	2662	2905	2201	2276	2496
18238.7	2648	2663	2891	2221	2277	2490
18358.7	2650	2638	2894	2270	2290	2463
18478.7	2611	2630	2876	2292	2280	2437
18598.7	2566	2614	2871	2293	2247	2438
18718.7	2531	2631	2875	2272	2260	2433
18838.7	2483	2626	2855	2211	2250	2416
18958.7	2448	2603	2836	2197	2229	2412
19078.7	2393	2589	2847	2197	2211	2381
19198.7	2345	2585	2817	2205	2231	2367
19318.7	2289	2553	2820	2207	2231	2354
19438.7	2249	2564	2820	2214	2219	2295
19558.7	2191	2554	2799	2210	2200	2297
19678.7	2121	2529	2783	2202	2201	2277
19798.7	2081	2526	2778	2197	2166	2281
19918.7	2026	2527	2751	2220	2141	2293
20038.7	1963	2497	2751	2210	2143	2287
20158.6	1913	2504	2747	2201	2150	2311
20278.6	1862	2491	2739	2144	2153	2264
20398.6	1804	2471	2717	2119	2168	2260
20518.6	1765	2452	2722	2087	2157	2236
20638.6	1709	2474	2698	2069	2147	2210
20758.6	1685	2454	2687	2080	2116	2217
20878.6	1641	2430	2683	2081	2115	2196
20998.6	1584	2427	2686	2100	2095	2179
21118.6	1552	2428	2663	2096	2094	2158
21238.6	1521	2397	2653	2101	2064	2147
21358.6	1494	2411	2651	2056	2047	2148
21478.6	1449	2395	2641	2035	2035	2160
21598.6	1401	2373	2626	2000	2013	2135
21718.6	1382	2370	2628	1993	1980	2135
21838.6	1331	2364	2620	1966	1987	2119
21958.6	1302	2347	2618	1940	1994	2081
22078.6	1287	2339	2599	1907	1991	2062
22198.6	1265	2345	2590	1891	1977	2062
22318.6	1239	2329	2583	1898	1960	2051
22438.6	1216	2322	2566	1909	1947	2068
22558.6	1189	2313	2554	1894	1940	2045
22678.6	1155	2281	2563	1902	1946	2046
22798.5	1129	2285	2541	1892	1925	2046
22918.5	1132	2284	2532	1877	1915	2021
23038.5	1111	2276	2517	1852	1918	2035
23158.5	1075	2270	2540	1846	1915	2022
23278.5	1069	2270	2502	1846	1919	2032
23398.5	1063	2236	2485	1831	1917	2019
23518.5	1040	2219	2492	1868	1915	2028
23638.5	1019	2227	2470	1900	1908	2032
23758.5	1013	2222	2470	1886	1902	2004
23878.5	987	2202	2453	1867	1891	1999
23998.5	992	2204	2452	1885	1856	2003
24118.5	936	2199	2434	1884	1835	2002
24238.5	949	2191	2444	1874	1809	2008
24358.5	932	2166	2413	1893	1786	2021
24478.5	934	2164	2419	1913	1762	2021
24598.5	913	2160	2422	1936	1738	2014
24718.5	913	2145	2390	1941	1749	2005
24838.5	878	2135	2408	1949	1725	2010
24958.5	885	2138	2400	1971	1741	2011
25078.5	878	2135	2380	1954	1741	2007
25198.5	856	2110	2380	1951	1734	2004
25318.4	851	2116	2374	1956	1745	1984
25438.4	848	2096	2367	1993	1725	1972
25558.4	828	2083	2366	1975	1717	1947
25678.4	818	2092	2364	1997	1709	1927
25798.4	822	2060	2338	1985	1691	1927
25918.4	820	2047	2342	1968	1681	1942
26038.4	811	2056	2333	1956	1699	1913
26158.4	783	2043	2302	1931	1688	1904
26278.4	774	2028	2316	1945	1701	1882
26398.4	768	2027	2288	1918	1716	1875
26518.4	765	2022	2294	1900	1717	1865
26638.4	757	2015	2288	1871	1738	1831
26758.4	743	1999	2282	1871	1741	1821
26878.4	739	2011	2250	1847	1761	1798
26998.4	733	1991	2254	1819	1774	1771
27118.3	742	1996	2233	1806	1772	1779
27238.3	727	1984	2233	1780	1750	1761
27358.3	720	1965	2220	1774	1780	1736
27478.3	707	1963	2228	1745	1794	1744
27598.3	698	1955	2212	1706	1792	1727
27718.3	694	1953	2203	1699	1786	1706
27838.3	695	1954	2201	1692	1760	1712
27958.3	682	1933	2180	1667	1755	1685
28078.3	658	1928	2174	1666	1737	1677
28198.3	666	1916	2166	1657	1729	1667
28318.3	655	1915	2144	1628	1725	1654
28438.3	659	1918	2151	1599	1714	1631
28558.3	652	1893	2151	1605	1697	1634
28678.3	643	1882	2126	1573	1708	1629
28798.3	629	1874	2114	1583	1693	1612
28918.2	608	1881	2111	1558	1682	1623
29038.2	613	1873	2103	1549	1674	1617
29158.2	611	1863	2105	1528	1649	1598
29278.2	601	1868	2080	1510	1635	1570
29398.2	603	1856	2078	1486	1607	1556
29518.2	600	1844	2067	1475	1594	1515
29638.2	581	1832	2052	1459	1566	1507
29758.2	576	1817	2056	1443	1543	1509
29878.2	582	1825	2040	1431	1541	1492
29998.2	575	1801	2049	1424	1527	1487
30118.2	559	1808	2031	1422	1520	1480
30238.2	555	1799	2027	1408	1518	1485
30358.2	567	1790	2013	1423	1507	1486
30478.2	549	1786	2001	1405	1513	1505
30598.2	544	1784	1987	1415	1495	1513
30718.2	547	1766	1968	1384	1492	1519
30838.2	532	1765	1975	1386	1475	1524
30958.1	520	1769	1977	1366	1456	1544
31078.1	525	1747	1965	1350	1461	1544
31198.1	519	1735	1963	1340	1439	1598
31318.1	513	1735	1947	1347	1426	1620
31438.1	507	1730	1940	1331	1404	1622
31558.1	502	1725	1945	1341	1409	1639
31678.1	498	1720	1925	1339	1388	1662
31798.1	497	1687	1906	1371	1366	1646
31918.1	487	1702	1916	1359	1359	1632
32038.1	481	1694	1906	1383	1343	1650
32158.1	476	1679	1911	1375	1316	1628
32278.1	464	1676	1881	1358	1302	1620
32398.1	472	1675	1876	1367	1307	1605
32518.1	452	1665	1884	1357	1308	1592
32638	449	1662	1866	1355	1301	1552
32758	449	1649	1867	1338	1312	1564
32878.1	449	1650	1851	1320	1309	1534
32998	435	1654	1830	1317	1305	1528
33118	437	1634	1818	1312	1323	1522
33238	442	1615	1819	1320	1330	1510
33358	418	1613	1810	1331	1317	1496
33478	416	1608	1801	1323	1331	1471
33598	402	1603	1805	1338	1329	1470
33718	399	1597	1783	1357	1327	1448
33838	412	1588	1784	1375	1314	1462
33958	392	1587	1788	1414	1307	1476
34078	390	1568	1771	1418	1309	1476
34198	395	1566	1756	1439	1304	1467
34318	385	1569	1756	1445	1298	1446
34438	374	1565	1737	1482	1278	1448
34557.9	375	1559	1734	1527	1260	1432
34677.9	364	1543	1712	1538	1265	1422
34797.9	362	1540	1729	1549	1261	1408
34917.9	351	1527	1700	1561	1249	1404
35037.9	351	1523	1710	1593	1221	1410
35157.9	353	1509	1701	1595	1227	1379
35277.9	341	1498	1688	1600	1228	1365
35397.9	336	1495	1672	1586	1214	1356
35517.9	332	1486	1670	1598	1198	1318
35637.9	325	1476	1662	1616	1185	1325
35757.9	313	1466	1648	1596	1186	1313
35877.9	309	1472	1635	1600	1188	1286
35997.9	307	1459	1633	1589	1206	1274
36117.9	310	1450	1608	1586	1199	1260
36237.9	295	1471	1615	1556	1205	1238
36357.9	300	1446	1608	1532	1229	1224
36477.9	283	1438	1608	1523	1230	1206
36597.9	281	1435	1609	1506	1245	1183
36717.9	274	1424	1596	1481	1251	1174
36837.9	269	1423	1594	1478	1265	1182
36957.9	261	1419	1566	1454	1282	1170
37077.9	265	1405	1568	1447	1305	1140
37197.8	253	1388	1562	1449	1328	1117
37317.8	260	1398	1547	1448	1361	1114
37437.8	249	1387	1547	1439	1377	1086
37557.8	244	1382	1523	1422	1396	1081
37677.8	234	1374	1532	1419	1413	1072
37797.8	234	1374	1517	1407	1429	1053
37917.8	232	1354	1521	1403	1435	1048
38037.8	227	1346	1513	1370	1449	1055
38157.8	225	1356	1513	1349	1470	1037
38277.8	219	1337	1500	1347	1453	1046
38397.8	208	1337	1488	1323	1449	1047
38517.8	205	1335	1479	1308	1440	1060
38637.8	205	1322	1468	1294	1446	1059
38757.8	195	1319	1473	1280	1424	1072
38877.8	188	1314	1457	1255	1436	1092
38997.8	176	1308	1470	1241	1428	1089
39117.8	180	1308	1439	1247	1418	1103
39237.8	172	1297	1452	1229	1410	1110
39357.7	160	1299	1445	1222	1396	1131
39477.7	161	1288	1433	1218	1378	1135
39597.7	142	1288	1423	1208	1378	1150
39717.7	144	1271	1414	1206	1380	1146
39837.7	149	1264	1416	1177	1380	1163
39957.7	129	1260	1405	1161	1366	1170
40077.7	144	1268	1407	1142	1363	1164
40197.7	141	1259	1394	1138	1361	1167
40317.7	136	1247	1389	1120	1365	1174
40437.7	127	1244	1384	1097	1349	1173
40557.7	124	1243	1390	1072	1366	1159
40677.7	112	1233	1381	1069	1367	1180
40797.7	115	1223	1375	1060	1350	1187
40917.7	107	1222	1376	1037	1367	1162
41037.7	92	1212	1356	1038	1364	1179
41157.7	102	1214	1355	1017	1367	1170
41277.7	107	1199	1345	1016	1367	1158
41397.7	78	1201	1348	1021	1361	1140
41517.7	68	1196	1338	996	1361	1122
41637.7	72	1186	1342	1002	1346	1091
41757.6	84	1191	1313	995	1346	1071
41877.6	66	1180	1332	1010	1348	1059
41997.6	64	1173	1317	1016	1359	1043
42117.6	66	1175	1318	1040	1344	1029
42237.6	53	1156	1303	1055	1330	1017
42357.6	56	1157	1291	1059	1329	1009
42477.6	46	1148	1290	1053	1341	986
42597.6	28	1158	1293	1058	1332	991
42717.6	33	1151	1273	1052	1326	985
42837.6	32	1137	1258	1050	1327	982
42957.6	35	1144	1254	1053	1333	976
43077.6	26	1136	1257	1046	1338	977
43197.6	24	1129	1260	1047	1334	989
43317.6	14	1127	1237	1037	1348	991
43437.6	19	1117	1230	1031	1330	1002
43557.6	8	1106	1230	1027	1324	998
43677.6	3	1121	1218	1031	1320	993
43797.6	9	1103	1209	1050	1324	989
43917.6	-6	1097	1190	1038	1303	965
44037.6	2	1095	1191	1045	1284	915
44157.6	-2	1080	1185	1056	1273	891
44277.5	-10	1075	1185	1033	1262	868
44397.6	-5	1076	1176	1036	1259	824
44517.5	0	1075	1167	1034	1259	811
44637.5	-10	1067	1157	1027	1245	806
44757.5	-10	1060	1148	1019	1248	784
44877.5	-22	1063	1149	1010	1237	777
44997.5	1	1060	1141	998	1228	775
45117.5	-8	1046	1146	992	1207	764
45237.5	-10	1043	1142	972	1205	771
45357.5	-15	1038	1123	952	1199	741
45477.5	-11	1043	1119	953	1177	749
45597.5	-2	1031	1121	960	1160	725
45717.5	-13	1029	1104	951	1139	720
45837.5	-16	1030	1103	942	1135	708
45957.5	-22	1015	1104	944	1102	717
46077.5	-22	1016	1083	954	1090	701
46197.5	-17	1010	1076	962	1085	691
46317.5	-25	1012	1072	976	1075	695
46437.5	-19	1018	1079	974	1062	689
46557.5	-6	990	1070	967	1055	686
46677.5	-4	993	1068	947	1048	688
46797.5	0	996	1050	924	1036	687
46917.5	-13	981	1031	916	1036	679
47037.4	-9	981	1040	886	1021	659
47157.4	0	977	1035	878	998	638
47277.4	2	985	1035	859	994	655
47397.4	1	974	1024	866	985	638
47517.4	12	957	1004	853	983	650
47637.4	23	963	993	851	972	629
47757.4	30	951	997	833	967	637
47877.4	34	950	999	823	954	626
47997.4	52	949	995	801	948	625
48117.4	58	939	977	811	925	606
48237.4	71	943	984	798	906	599
48357.4	85	937	965	789	884	595
48477.4	89	930	962	786	868	582
48597.4	100	928	962	768	835	571
48717.4	123	905	950	732	814	571
48837.4	126	921	959	704	809	561
48957.4	138	916	944	695	781	559
49077.4	155	914	939	707	774	562
49197.4	157	904	945	716	760	542
49317.4	175	907	938	744	753	542
49437.4	176	894	922	776	746	547
49557.3	191	902	921	785	739	547
49677.3	206	897	910	796	741	544
49797.3	213	877	912	783	741	532
49917.3	218	876	914	759	721	543
50037.3	235	882	900	740	714	531
50157.3	226	872	896	725	706	516
50277.3	242	864	882	704	687	514
50397.3	258	863	879	701	695	527
50517.3	266	864	880	687	685	510
50637.3	255	857	877	672	686	515
50757.3	264	857	873	680	675	519
50877.3	284	847	855	685	661	536
50997.3	268	850	862	683	668	539
51117.3	273	836	858	671	658	528
51237.2	285	828	838	664	657	538
51357.2	280	837	841	676	658	542
51477.2	297	830	833	657	652	543
51597.2	294	815	827	657	646	546
51717.2	293	820	819	651	625	536
51837.2	298	814	819	639	613	531
51957.2	313	806	812	632	578	519
52077.2	317	813	807	620	578	485
52197.2	326	791	793	598	571	481
52317.2	319	791	792	571	550	442
52437.2	351	790	795	553	540	435
52557.2	349	781	792	533	533	423
52677.2	351	782	783	528	507	417
52797.2	355	783	790	535	494	386
52917.2	360	781	774	524	496	376
53037.2	378	764	767	522	482	362
53157.2	380	774	759	504	478	359
53277.2	382	762	763	492	489	349
53397.2	380	756	755	466	488	332
53517.2	388	756	752	458	496	335
53637.2	395	749	752	450	477	328
53757.1	408	753	737	434	476	326
53877.1	405	743	729	431	466	311
53997.1	413	743	725	440	467	308
54117.1	420	734	737	458	454	309
54237.1	418	728	723	470	440	291
54357.1	416	728	720	473	433	292
54477.1	426	729	703	460	441	279
54597.1	433	721	720	447	437	284
54717.1	445	720	701	418	454	272
54837.1	440	712	703	400	452	280
54957.1	447	715	704	393	477	256
55077.1	457	711	694	377	491	267
55197.1	460	701	689	382	505	291
55317.1	449	702	679	360	494	306
55437.1	452	695	674	353	483	325
55557.1	442	702	680	354	494	324
55677.1	445	695	669	361	493	327
55797	448	688	663	372	510	339
55917.1	439	693	660	382	513	332
56037	436	687	650	390	528	332
56157	452	684	663	377	502	321
56277	433	672	649	384	479	300
56397	439	670	647	381	434	305
56517	441	670	637	374	407	290
56637	430	668	633	338	380	281
56757	426	668	629	312	374	273
56877	437	666	631	317	367	259
56997	430	674	626	332	365	228
57117	426	654	623	331	364	208
57237	431	652	626	295	383	214
57357	422	642	617	282	375	200
57477	428	645	604	281	371	194

## Sheet: Data Fitting
NOTE: values under the sample name denote RFU
time (s)	actin1	fitting coefficients	Fitted value			time (s)	actin 2	fitting coefficients	Fitted value			time (s)	actin 3	fitting coefficients	Fitted value			time (s)	FF ICD 1	fitting coefficients	Fitted value		time (s)	FF ICD 2	fitting coefficients	Fitted value			time (s)	FF ICD 3	fitting coefficients	Fitted value
0	0	1.31572e-20	0			0.446	0	1.03327e-20	0.368559			0.823	0	1.47997e-20	0.71849			1.2	0	9.68835e-21	0.135216		1.577	0	3.71402e-21	0.498398			1.954	0	2.93754e-21	0.781554
119.493	57	6.44372e-16	155.229			119.98	42	5.14298e-16	101.297			120.357	42	7.2886e-16	108.386			120.734	54	4.65888e-16	17.1042		121.111	58	1.79307e-16	39.3776			121.488	52	1.04135e-16	48.3699
239.481	178	1.14836e-11	313.303			239.968	89	9.46281e-12	206.427			240.345	89	1.32861e-11	222.392			240.722	90	8.45781e-12	40.6355		241.1	95	3.249e-12	80.4135			241.477	97	1.18087e-12	95.6727
359.49	314	8.34934e-08	472.829			359.978	170	7.45055e-08	314.699			360.355	159	1.04405e-07	341.378			360.732	118	7.1251e-08	70.0069		361.109	126	2.68464e-08	123.215			361.487	120	4.21936e-09	142.481
479.481	444	0.000105436	633.026			479.969	252	0.00015874	425.416			480.346	247	0.000242736	464.377			480.723	144	0.000251081	104.571		481.1	151	7.93295e-05	167.529			481.477	146	1.48155e-05	188.749
599.477	623	1.28764	793.248			599.965	361	0.826296	537.985			600.342	339	0.872814	590.551			600.72	172	0.112379	143.734		601.097	179	0.315917	213.139			601.474	182	0.400005	234.461
719.476	797		952.864			719.964	474		651.826			720.341	466		719.091			720.718	199		186.932		721.095	214		259.834			721.472	209		279.596
839.47	943		1111.28			839.958	586		766.395			840.335	601		849.237			840.712	220		233.636		841.089	241		307.412			841.466	260		324.136
959.459	1108		1267.97			959.947	710		881.196			960.325	748		980.294			960.702	278		283.351		961.079	281		355.691			961.456	280		368.068
1079.46	1294		1422.46			1079.95	870		995.783			1080.32	895		1111.63			1080.7	325		335.624		1081.08	341		404.504			1081.45	338		411.39
1199.44	1469		1574.27			1199.93	1009		1109.7			1200.31	1065		1242.62			1200.68	373		390.012		1201.06	382		453.682			1201.44	380		454.088
1319.43	1637		1723.02			1319.92	1165		1222.59			1320.3	1228		1372.74			1320.67	427		446.129		1321.05	444		503.087			1321.43	456		496.169
1439.43	1811		1868.34			1439.91	1326		1334.07			1440.29	1414		1501.5			1440.67	483		503.604		1441.05	505		552.579			1441.42	474		537.634
1559.43	1969		2009.92			1559.92	1467		1443.85			1560.3	1602		1628.43			1560.68	548		562.101		1561.05	568		602.039			1561.43	527		578.492
1679.41	2153		2147.41			1679.9	1579		1551.57			1680.28	1775		1753.08			1680.66	607		621.283		1681.03	617		651.333			1681.41	586		618.736
1799.41	2305		2280.62			1799.9	1712		1657.02			1800.28	1957		1875.13			1800.66	670		680.888		1801.03	676		700.375			1801.41	618		658.392
1919.41	2458		2409.28			1919.9	1849		1759.94			1920.28	2095		1994.21			1920.65	699		740.639		1921.03	727		749.062			1921.41	654		697.464
2039.4	2596		2533.2			2039.89	1964		1860.1			2040.27	2260		2110.02			2040.64	776		800.292		2041.02	794		797.302			2041.4	714		735.964
2159.39	2740		2652.23			2159.88	2055		1957.33			2160.26	2390		2222.31			2160.64	830		859.635		2161.01	879		845.021			2161.39	779		773.911
2279.38	2857		2766.23			2279.87	2165		2051.47			2280.25	2528		2330.84			2280.62	857		918.47		2281	967		892.148			2281.38	812		811.321
2399.37	2992		2875.09			2399.86	2271		2142.36			2400.24	2636		2435.42			2400.62	900		976.623		2400.99	937		938.623			2401.37	871		848.215
2519.37	3097		2978.73			2519.85	2346		2229.91			2520.23	2729		2535.88			2520.61	971		1033.93		2520.99	1004		984.388			2521.36	892		884.609
2639.38	3181		3077.1			2639.86	2439		2314			2640.24	2814		2632.09			2640.61	1107		1090.28		2640.99	1064		1029.4			2641.37	940		920.53
2759.35	3304		3170.14			2759.84	2503		2394.55			2760.22	2880		2723.9			2760.59	1195		1145.5		2760.97	1106		1073.61			2761.35	999		955.987
2879.35	3372		3257.87			2879.84	2578		2471.52			2880.22	2971		2811.28			2880.59	1245		1199.54		2880.97	1163		1116.99			2881.35	1065		991.014
2999.35	3459		3340.28			2999.84	2624		2544.85			3000.22	3059		2894.13			3000.59	1256		1252.28		3000.97	1224		1159.51			3001.35	1088		1025.63
3119.34	3519		3417.38			3119.83	2699		2614.52			3120.21	3115		2972.43			3120.58	1260		1303.65		3120.96	1246		1201.14			3121.34	1149		1059.85
3239.32	3579		3489.23			3239.81	2742		2680.51			3240.19	3152		3046.14			3240.56	1349		1353.59		3240.94	1296		1241.86			3241.32	1160		1093.7
3359.32	3628		3555.91			3359.81	2775		2742.85			3360.19	3199		3115.3			3360.57	1409		1402.07		3360.94	1347		1281.68			3361.32	1210		1127.21
3479.31	3698		3617.46			3479.8	2815		2801.54			3480.17	3245		3179.91			3480.55	1421		1449.03		3480.93	1386		1320.57			3481.3	1236		1160.39
3599.31	3742		3674			3599.79	2848		2856.62			3600.17	3300		3240.02			3600.55	1481		1494.46		3600.93	1427		1358.53			3601.3	1267		1193.28
3719.3	3762		3725.62			3719.79	2895		2908.13			3720.17	3321		3295.68			3720.55	1550		1538.35		3720.92	1485		1395.56			3721.3	1286		1225.88
3839.3	3820		3772.43			3839.79	2930		2956.13			3840.17	3345		3346.97			3840.54	1646		1580.69		3840.92	1524		1431.67			3841.3	1322		1258.23
3959.29	3846		3814.56			3959.78	2966		3000.67			3960.15	3371		3393.96			3960.53	1708		1621.48		3960.91	1532		1466.85			3961.28	1343		1290.33
4079.3	3870		3852.17			4079.78	3016		3041.83			4080.16	3391		3436.77			4080.54	1733		1660.74		4080.91	1588		1501.13			4081.29	1357		1322.21
4199.29	3907		3885.37			4199.77	3061		3079.7			4200.15	3447		3475.5			4200.53	1754		1698.5		4200.9	1604		1534.51			4201.28	1395		1353.89
4319.28	3922		3914.34			4319.77	3077		3114.37			4320.15	3437		3510.27			4320.52	1759		1734.77		4320.9	1575		1567.02			4321.28	1431		1385.39
4439.29	3926		3939.24			4439.78	3109		3145.93			4440.15	3465		3541.21			4440.53	1710		1769.6		4440.91	1535		1598.66			4441.28	1468		1416.72
4559.27	3926		3960.22			4559.76	3134		3174.48			4560.13	3474		3568.46			4560.51	1780		1803.01		4560.89	1524		1629.46			4561.26	1487		1447.88
4679.27	3934		3977.47			4679.76	3145		3200.14			4680.13	3487		3592.17			4680.51	1944		1835.07		4680.89	1555		1659.44			4681.26	1503		1478.92
4799.27	3949		3991.16			4799.75	3188		3223.02			4800.13	3528		3612.49			4800.51	2069		1865.81		4800.89	1601		1688.62			4801.26	1530		1509.82
4919.26	3984		4001.47			4919.75	3225		3243.23			4920.12	3536		3629.58			4920.5	2051		1895.29		4920.88	1623		1717.02			4921.26	1552		1540.6
5039.25	3946		4008.59			5039.74	3229		3260.9			5040.12	3539		3643.6			5040.49	2086		1923.56		5040.87	1692		1744.69			5041.25	1566		1571.28
5159.26	3944		4012.71			5159.75	3207		3276.16			5160.13	3546		3654.71			5160.5	2116		1950.69		5160.88	1763		1771.63			5161.26	1571		1601.85
5279.24	3904		4014			5279.73	3244		3289.11			5280.1	3570		3663.09			5280.48	2195		1976.73		5280.86	1828		1797.87			5281.23	1631		1632.32
5399.24	3928		4012.66			5399.73	3245		3299.91			5400.1	3560		3668.91			5400.48	2154		2001.75		5400.86	1878		1823.46			5401.24	1649		1662.71
5519.24	3904		4008.88			5519.73	3236		3308.67			5520.1	3583		3672.34			5520.48	2133		2025.8		5520.86	1878		1848.41			5521.23	1682		1693.01
5639.23	3901		4002.84			5639.72	3264		3315.53			5640.09	3591		3673.55			5640.47	2071		2048.95		5640.85	1911		1872.74			5641.22	1722		1723.22
5759.23	3896		3994.73			5759.71	3248		3320.6			5760.09	3577		3672.72			5760.47	1877		2071.27		5760.84	1859		1896.5			5761.22	1723		1753.34
5879.23	3873		3984.73			5879.71	3255		3324.03			5880.09	3578		3670.01			5880.47	1833		2092.81		5880.85	1845		1919.71			5881.22	1763		1783.37
5999.21	3892		3973.03			5999.7	3274		3325.94			6000.07	3598		3665.6			6000.45	1819		2113.64		6000.83	1880		1942.39			6001.21	1782		1813.31
6119.21	3866		3959.79			6119.7	3277		3326.45			6120.07	3591		3659.65			6120.45	1841		2133.83		6120.83	1905		1964.58			6121.21	1782		1843.14
6239.21	3848		3945.2			6239.69	3295		3325.7			6240.07	3592		3652.32			6240.45	1868		2153.42		6240.83	1928		1986.3			6241.2	1813		1872.87
6359.2	3843		3929.43			6359.69	3301		3323.79			6360.07	3591		3643.78			6360.44	1900		2172.49		6360.82	1926		2007.58			6361.2	1869		1902.47
6479.19	3826		3912.63			6479.68	3295		3320.86			6480.06	3569		3634.19			6480.44	1983		2191.08		6480.81	1955		2028.44			6481.19	1890		1931.94
6599.2	3824		3894.97			6599.69	3297		3317.01			6600.07	3592		3623.69			6600.44	2066		2209.26		6600.82	1972		2048.91			6601.2	1905		1961.28
6719.18	3814		3876.62			6719.67	3301		3312.36			6720.05	3565		3612.44			6720.42	2139		2227.06		6720.8	1996		2069			6721.18	1934		1990.44
6839.18	3823		3857.7			6839.67	3306		3307.02			6840.05	3589		3600.58			6840.43	2151		2244.54		6840.8	2046		2088.75			6841.18	1935		2019.44
6959.18	3802		3838.37			6959.67	3310		3301.1			6960.05	3586		3588.23			6960.42	2191		2261.75		6960.8	2073		2108.16			6961.18	1956		2048.24
7079.18	3816		3818.76			7079.66	3304		3294.69			7080.04	3575		3575.54			7080.42	2215		2278.72		7080.79	2109		2127.27			7081.17	1986		2076.83
7199.17	3783		3799			7199.66	3277		3287.89			7200.03	3562		3562.62			7200.41	2264		2295.49		7200.79	2147		2146.09			7201.16	2000		2105.19
7319.18	3791		3779.21			7319.67	3282		3280.79			7320.04	3571		3549.59			7320.42	2332		2312.11		7320.8	2152		2164.64			7321.17	2030		2133.29
7439.15	3763		3759.51			7439.64	3269		3273.48			7440.02	3546		3536.56			7440.4	2401		2328.59		7440.77	2194		2182.92			7441.15	2060		2161.1
7559.16	3768		3740.01			7559.65	3282		3266.03			7560.02	3539		3523.63			7560.4	2426		2344.97		7560.78	2235		2200.96			7561.15	2086		2188.61
7679.16	3724		3720.8			7679.64	3281		3258.53			7680.02	3566		3510.9			7680.4	2452		2361.27		7680.78	2244		2218.77			7681.15	2083		2215.79
7799.14	3728		3701.97			7799.63	3275		3251.05			7800.01	3543		3498.45			7800.39	2497		2377.5		7800.76	2257		2236.35			7801.14	2107		2242.6
7919.14	3724		3683.62			7919.63	3276		3243.64			7920.01	3533		3486.36			7920.38	2528		2393.69		7920.76	2297		2253.71			7921.14	2135		2269.02
8039.15	3727		3665.8			8039.64	3260		3236.36			8040.01	3525		3474.7			8040.39	2682		2409.83		8040.77	2296		2270.86			8041.14	2185		2295.03
8159.12	3721		3648.6			8159.61	3253		3229.28			8159.99	3512		3463.53			8160.37	2698		2425.94		8160.74	2304		2287.8			8161.12	2246		2320.58
8279.13	3689		3632.07			8279.61	3225		3222.42			8279.99	3521		3452.91			8280.37	2687		2442.02		8280.75	2308		2304.54			8281.12	2310		2345.64
8399.12	3685		3616.25			8399.61	3252		3215.85			8399.99	3522		3442.87			8400.37	2637		2458.06		8400.74	2295		2321.07			8401.12	2361		2370.2
8519.11	3669		3601.2			8519.6	3231		3209.58			8519.97	3520		3433.47			8520.35	2543		2474.05		8520.73	2324		2337.4			8521.11	2410		2394.2
8639.11	3655		3586.94			8639.6	3249		3203.65			8639.98	3506		3424.71			8640.35	2428		2489.99		8640.73	2361		2353.52			8641.11	2456		2417.62
8759.12	3637		3573.5			8759.6	3238		3198.08			8759.98	3509		3416.64			8760.36	2397		2505.85		8760.74	2344		2369.43			8761.11	2493		2440.42
8879.09	3625		3560.9			8879.58	3248		3192.89			8879.96	3487		3409.25			8880.34	2415		2521.62		8880.72	2352		2385.12			8881.09	2575		2462.58
8999.1	3636		3549.15			8999.58	3245		3188.08			8999.96	3461		3402.56			9000.34	2467		2537.27		9000.72	2425		2400.59			9001.09	2589		2484.05
9119.1	3621		3538.25			9119.58	3233		3183.67			9119.96	3472		3396.55			9120.34	2546		2552.78		9120.71	2462		2415.83			9121.09	2583		2504.81
9239.08	3611		3528.19			9239.57	3222		3179.66			9239.95	3448		3391.22			9240.33	2613		2568.1		9240.7	2442		2430.81			9241.08	2611		2524.81
9359.08	3585		3518.97			9359.57	3208		3176.03			9359.95	3448		3386.56			9360.33	2694		2583.22		9360.7	2456		2445.54			9361.08	2657		2544.03
9479.09	3571		3510.55			9479.58	3216		3172.77			9479.95	3447		3382.52			9480.33	2658		2598.09		9480.71	2634		2460			9481.08	2645		2562.44
9599.07	3562		3502.92			9599.56	3223		3169.88			9599.93	3439		3379.1			9600.31	2646		2612.66		9600.69	2754		2474.17			9601.07	2663		2580
9719.07	3550		3496.04			9719.56	3201		3167.32			9719.93	3418		3376.23			9720.31	2624		2626.9		9720.69	2706		2488.04			9721.07	2683		2596.69
9839.07	3523		3489.87			9839.56	3205		3165.08			9839.93	3410		3373.88			9840.31	2599		2640.75		9840.69	2596		2501.59			9841.07	2650		2612.47
9959.06	3519		3484.37			9959.55	3188		3163.12			9959.92	3406		3372			9960.3	2616		2654.17		9960.68	2485		2514.81			9961.05	2707		2627.32
10079	3481		3479.48			10079.5	3175		3161.41			10079.9	3393		3370.53			10080.3	2617		2667.1		10080.7	2470		2527.66			10081	2885		2641.2
10199	3512		3475.14			10199.5	3180		3159.9			10199.9	3388		3369.4			10200.3	2582		2679.5		10200.7	2452		2540.14			10201	3102		2654.11
10319	3514		3471.3			10319.5	3171		3158.57			10319.9	3385		3368.57			10320.3	2610		2691.31		10320.6	2514		2552.22			10321	3116		2666
10439	3477		3467.89			10439.5	3175		3157.36			10439.9	3366		3367.95			10440.3	2618		2702.47		10440.7	2597		2563.88			10441	2968		2676.88
10559	3491		3464.84			10559.5	3157		3156.22			10559.9	3366		3367.46			10560.3	2620		2712.94		10560.6	2672		2575.1			10561	2819		2686.71
10679	3470		3462.08			10679.5	3168		3155.11			10679.9	3351		3367.05			10680.3	2645		2722.64		10680.6	2721		2585.86			10681	2675		2695.48
10799	3451		3459.54			10799.5	3155		3153.97			10799.9	3357		3366.62			10800.3	2649		2731.54		10800.6	2695		2596.13			10801	2657		2703.19
10919	3454		3457.13			10919.5	3136		3152.75			10919.9	3344		3366.11			10920.3	2672		2739.57		10920.6	2614		2605.9			10921	2703		2709.82
11039	3422		3454.78			11039.5	3146		3151.4			11039.9	3340		3365.42			11040.2	2673		2746.68		11040.6	2549		2615.15			11041	2685		2715.36
11159	3446		3452.41			11159.5	3113		3149.85			11159.9	3339		3364.48			11160.3	2689		2752.83		11160.6	2557		2623.84			11161	2648		2719.82
11279	3420		3449.94			11279.5	3124		3148.05			11279.9	3328		3363.21			11280.2	2746		2757.95		11280.6	2564		2631.97			11281	2627		2723.2
11399	3427		3447.29			11399.5	3107		3145.95			11399.8	3313		3361.52			11400.2	2862		2762.01		11400.6	2541		2639.52			11401	2689		2725.5
11519	3393		3444.38			11519.5	3136		3143.49			11519.9	3322		3359.35			11520.2	2940		2764.95		11520.6	2534		2646.46			11521	2686		2726.75
11639	3390		3441.14			11639.5	3111		3140.63			11639.9	3307		3356.62			11640.2	2935		2766.76		11640.6	2546		2652.78			11641	2645		2726.94
11759	3398		3437.5			11759.5	3117		3137.29			11759.8	3292		3353.26			11760.2	2859		2767.38		11760.6	2558		2658.47			11761	2598		2726.12
11879	3391		3433.38			11879.5	3091		3133.45			11879.8	3305		3349.21			11880.2	2813		2766.79		11880.6	2594		2663.51			11881	2626		2724.29
11999	3389		3428.72			11999.5	3080		3129.05			11999.8	3295		3344.39			12000.2	2848		2764.96		12000.6	2548		2667.88			12001	2568		2721.5
12119	3368		3423.47			12119.4	3064		3124.06			12119.8	3284		3338.78			12120.2	2844		2761.88		12120.6	2544		2671.59			12121	2531		2717.78
12239	3364		3417.56			12239.5	3083		3118.43			12239.8	3269		3332.3			12240.2	2823		2757.54		12240.6	2606		2674.63			12241	2505		2713.18
12359	3341		3410.95			12359.4	3066		3112.13			12359.8	3252		3324.94			12360.2	2811		2751.94		12360.6	2624		2676.98			12361	2570		2707.76
12478.9	3352		3403.61			12479.4	3061		3105.15			12479.8	3271		3316.67			12480.2	2701		2745.08		12480.6	2655		2678.66			12480.9	2565		2701.56
12598.9	3341		3395.5			12599.4	3057		3097.45			12599.8	3234		3307.46			12600.2	2690		2736.97		12600.6	2717		2679.66			12600.9	2618		2694.65
12718.9	3328		3386.61			12719.4	3064		3089.03			12719.8	3249		3297.31			12720.2	2655		2727.65		12720.6	2773		2680			12720.9	2578		2687.12
12838.9	3306		3376.92			12839.4	3057		3079.89			12839.8	3238		3286.23			12840.2	2617		2717.15		12840.5	2788		2679.67			12840.9	2571		2679.04
12958.9	3309		3366.44			12959.4	3039		3070.03			12959.8	3231		3274.25			12960.2	2607		2705.52		12960.6	2769		2678.7			12960.9	2566		2670.5
13078.9	3275		3355.2			13079.4	3040		3059.47			13079.8	3230		3261.4			13080.2	2624		2692.82		13080.5	2686		2677.11			13080.9	2516		2661.6
13198.9	3271		3343.21			13199.4	3031		3048.23			13199.8	3214		3247.74			13200.2	2644		2679.12		13200.5	2686		2674.92			13200.9	2523		2652.45
13318.9	3289		3330.53			13319.4	3017		3036.36			13319.8	3205		3233.33			13320.2	2662		2664.51		13320.5	2689		2672.16			13320.9	2592		2643.16
13438.9	3281		3317.21			13439.4	3013		3023.91			13439.8	3209		3218.28			13440.1	2619		2649.1		13440.5	2671		2668.86			13440.9	2636		2633.87
13558.9	3268		3303.35			13559.4	3016		3010.93			13559.8	3184		3202.7			13560.1	2608		2633.01		13560.5	2635		2665.07			13560.9	2656		2624.71
13678.9	3297		3289.04			13679.4	2981		2997.51			13679.8	3196		3186.71			13680.2	2554		2616.36		13680.5	2660		2660.83			13680.9	2666		2615.83
13798.9	3274		3274.4			13799.4	2984		2983.75			13799.8	3190		3170.48			13800.1	2594		2599.31		13800.5	2697		2656.21			13800.9	2673		2607.39
13918.9	3312		3259.58			13919.4	2975		2969.75			13919.8	3175		3154.18			13920.1	2580		2582.05		13920.5	2656		2651.25			13920.9	2701		2599.56
14038.9	3269		3244.73			14039.4	2963		2955.64			14039.8	3174		3138.04			14040.1	2554		2564.75		14040.5	2650		2646.02			14040.9	2675		2592.52
14158.9	3272		3230.06			14159.4	2968		2941.58			14159.7	3158		3122.28			14160.1	2528		2547.64		14160.5	2618		2640.62			14160.9	2688		2586.48
14278.9	3262		3215.77			14279.4	2963		2927.71			14279.7	3156		3107.16			14280.1	2516		2530.95		14280.5	2586		2635.11			14280.9	2667		2581.63
14398.9	3277		3202.11			14399.4	2954		2914.24			14399.7	3125		3093			14400.1	2517		2514.94		14400.5	2552		2629.59			14400.9	2660		2578.2
14518.9	3264		3189.34			14519.3	2950		2901.37			14519.7	3140		3080.11			14520.1	2504		2499.89		14520.5	2569		2624.17			14520.9	2658		2576.42
14638.9	3257		3177.77			14639.3	2943		2889.34			14639.7	3162		3068.86			14640.1	2520		2486.1		14640.5	2628		2618.95			14640.8	2662		2576.54
14758.9	3248		3167.73			14759.3	2921		2878.38			14759.7	3122		3059.64			14760.1	2512		2473.92		14760.5	2702		2614.06			14760.9	2658		2578.83
14878.8	3246		3159.59			14879.3	2915		2868.8			14879.7	3129		3052.9			14880.1	2516		2463.7		14880.5	2711		2609.62			14880.8	2664		2583.56
14998.8	3239		3153.73			14999.3	2894		2860.88			14999.7	3104		3049.11			15000.1	2522		2455.84		15000.5	2665		2605.79			15000.8	2682		2591.02
15118.8	3222		3150.61			15119.3	2907		2854.97			15119.7	3105		3048.78			15120.1	2513		2450.74		15120.5	2663		2602.71			15120.8	2664		2601.54
15238.8	3197		3150.69			15239.3	2880		2851.43			15239.7	3110		3052.47			15240.1	2516		2448.88		15240.4	2643		2600.55			15240.8	2692		2615.42
15358.8	3177		3154.48			15359.3	2877		2850.65			15359.7	3094		3060.79			15360.1	2458		2450.71		15360.4	2628		2599.48			15360.8	2662		2633.02
15478.8	3166		3162.54			15479.3	2880		2853.06			15479.7	3093		3074.39			15480.1	2474		2456.77		15480.4	2608		2599.7			15480.8	2670		2654.69
15598.8	3150		3175.47			15599.3	2850		2859.1			15599.7	3078		3093.96			15600.1	2487		2467.6		15600.4	2583		2601.41			15600.8	2661		2680.81
15718.8	3155		3193.89			15719.3	2823		2869.28			15719.7	3081		3120.25			15720.1	2465		2483.8		15720.4	2584		2604.83			15720.8	2633		2711.78
15838.8	3122		3218.5			15839.3	2822		2884.1			15839.7	3052		3154.07			15840.1	2475		2505.97		15840.4	2567		2610.18			15840.8	2650		2748.01
15958.8	3121		3250.04			15959.3	2822		2904.15			15959.7	3072		3196.25			15960	2432		2534.79		15960.4	2537		2617.71			15960.8	2623		2789.94

## Sheet: Fitting Parameters
actin 1 trendline
y = 0.000000000000000000013157223870x6 - 0.000000000000000644371804965999x5 + 0.000000000011483593142912100000x4 - 0.000000083493382723245900000000x3 + 0.000105436376685475000000000000x2 + 1.287640411334000000000000000000x
1.31572e-20
6.44372e-16
1.14836e-11
8.34934e-08
0.000105436
1.28764
actin 2 trendline
y = 0.000000000000000000010332707898x6 - 0.000000000000000514297576888722x5 + 0.000000000009462805992101890000x4 - 0.000000074505475569468200000000x3 + 0.000158740246412492000000000000x2 + 0.826295720424241000000000000000x
1.03327e-20
5.14298e-16
9.46281e-12
7.45055e-08
0.00015874
0.826296
actin 3 trendline
y = 0.000000000000000000014799726089x6 - 0.000000000000000728860211916934x5 + 0.000000000013286065280902100000x4 - 0.000000104404660802165000000000x3 + 0.000242736304403302000000000000x2 + 0.872813534846500000000000000000x
1.47997e-20
7.2886e-16
1.32861e-11
1.04405e-07
0.000242736
0.872814
FF ICD 1
y = 0.000000000000000000009688345567x6 - 0.000000000000000465888144413628x5 + 0.000000000008457808998070200000x4 - 0.000000071251009333903000000000x3 + 0.000251081052463853000000000000x2 + 0.112378555036230000000000000000x
9.68835e-21
4.65888e-16
8.45781e-12
7.1251e-08
0.000251081
0.112379
FF ICD 2
y = 0.000000000000000000003714024752x6 - 0.000000000000000179306831180722x5 + 0.000000000003248997158608180000x4 - 0.000000026846371271004000000000x3 + 0.000079329479554246500000000000x2 + 0.315916863857638000000000000000x
3.71402e-21
1.79307e-16
3.249e-12
2.68464e-08
7.93295e-05
0.315917
y = 0.000000000000000000002937536364x6 - 0.000000000000000104134740692624x5 + 0.000000000001180872247522250000x4 - 0.000000004219364818040110000000x3 - 0.000014815456306216400000000000x2 + 0.400005465109643000000000000000x
2.93754e-21
1.04135e-16
1.18087e-12
4.21936e-09
1.48155e-05
0.400005

## Sheet: Fit vs Actual
NOTE: values under the sample name denote RFU
time (s)	actin1	actin1f		time (s)	actin 2	actin 2f		time (s)	actin 3	actin 3f		time (s)	FF ICD 1	FF ICD 1f		time (s)	FF ICD 2	FF ICD 2f		time (s)	FF ICD 3	FF ICD 3f
0	0	0		0.446	0	0.368559		0.823	0	0.71849		1.2	0	0.135216		1.577	0	0.498398		1.954	0	0.781554
119.493	57	155.229		119.98	42	101.297		120.357	42	108.386		120.734	54	17.1042		121.111	58	39.3776		121.488	52	48.3699
239.481	178	313.303		239.968	89	206.427		240.345	89	222.392		240.722	90	40.6355		241.1	95	80.4135		241.477	97	95.6727
359.49	314	472.829		359.978	170	314.699		360.355	159	341.378		360.732	118	70.0069		361.109	126	123.215		361.487	120	142.481
479.481	444	633.026		479.969	252	425.416		480.346	247	464.377		480.723	144	104.571		481.1	151	167.529		481.477	146	188.749
599.477	623	793.248		599.965	361	537.985		600.342	339	590.551		600.72	172	143.734		601.097	179	213.139		601.474	182	234.461
719.476	797	952.864		719.964	474	651.826		720.341	466	719.091		720.718	199	186.932		721.095	214	259.834		721.472	209	279.596
839.47	943	1111.28		839.958	586	766.395		840.335	601	849.237		840.712	220	233.636		841.089	241	307.412		841.466	260	324.136
959.459	1108	1267.97		959.947	710	881.196		960.325	748	980.294		960.702	278	283.351		961.079	281	355.691		961.456	280	368.068
1079.46	1294	1422.46		1079.95	870	995.783		1080.32	895	1111.63		1080.7	325	335.624		1081.08	341	404.504		1081.45	338	411.39
1199.44	1469	1574.27		1199.93	1009	1109.7		1200.31	1065	1242.62		1200.68	373	390.012		1201.06	382	453.682		1201.44	380	454.088
1319.43	1637	1723.02		1319.92	1165	1222.59		1320.3	1228	1372.74		1320.67	427	446.129		1321.05	444	503.087		1321.43	456	496.169
1439.43	1811	1868.34		1439.91	1326	1334.07		1440.29	1414	1501.5		1440.67	483	503.604		1441.05	505	552.579		1441.42	474	537.634
1559.43	1969	2009.92		1559.92	1467	1443.85		1560.3	1602	1628.43		1560.68	548	562.101		1561.05	568	602.039		1561.43	527	578.492
1679.41	2153	2147.41		1679.9	1579	1551.57		1680.28	1775	1753.08		1680.66	607	621.283		1681.03	617	651.333		1681.41	586	618.736
1799.41	2305	2280.62		1799.9	1712	1657.02		1800.28	1957	1875.13		1800.66	670	680.888		1801.03	676	700.375		1801.41	618	658.392
1919.41	2458	2409.28		1919.9	1849	1759.94		1920.28	2095	1994.21		1920.65	699	740.639		1921.03	727	749.062		1921.41	654	697.464
2039.4	2596	2533.2		2039.89	1964	1860.1		2040.27	2260	2110.02		2040.64	776	800.292		2041.02	794	797.302		2041.4	714	735.964
2159.39	2740	2652.23		2159.88	2055	1957.33		2160.26	2390	2222.31		2160.64	830	859.635		2161.01	879	845.021		2161.39	779	773.911
2279.38	2857	2766.23		2279.87	2165	2051.47		2280.25	2528	2330.84		2280.62	857	918.47		2281	967	892.148		2281.38	812	811.321
2399.37	2992	2875.09		2399.86	2271	2142.36		2400.24	2636	2435.42		2400.62	900	976.623		2400.99	937	938.623		2401.37	871	848.215
2519.37	3097	2978.73		2519.85	2346	2229.91		2520.23	2729	2535.88		2520.61	971	1033.93		2520.99	1004	984.388		2521.36	892	884.609
2639.38	3181	3077.1		2639.86	2439	2314		2640.24	2814	2632.09		2640.61	1107	1090.28		2640.99	1064	1029.4		2641.37	940	920.53
2759.35	3304	3170.14		2759.84	2503	2394.55		2760.22	2880	2723.9		2760.59	1195	1145.5		2760.97	1106	1073.61		2761.35	999	955.987
2879.35	3372	3257.87		2879.84	2578	2471.52		2880.22	2971	2811.28		2880.59	1245	1199.54		2880.97	1163	1116.99		2881.35	1065	991.014
2999.35	3459	3340.28		2999.84	2624	2544.85		3000.22	3059	2894.13		3000.59	1256	1252.28		3000.97	1224	1159.51		3001.35	1088	1025.63
3119.34	3519	3417.38		3119.83	2699	2614.52		3120.21	3115	2972.43		3120.58	1260	1303.65		3120.96	1246	1201.14		3121.34	1149	1059.85
3239.32	3579	3489.23		3239.81	2742	2680.51		3240.19	3152	3046.14		3240.56	1349	1353.59		3240.94	1296	1241.86		3241.32	1160	1093.7
3359.32	3628	3555.91		3359.81	2775	2742.85		3360.19	3199	3115.3		3360.57	1409	1402.07		3360.94	1347	1281.68		3361.32	1210	1127.21
3479.31	3698	3617.46		3479.8	2815	2801.54		3480.17	3245	3179.91		3480.55	1421	1449.03		3480.93	1386	1320.57		3481.3	1236	1160.39
3599.31	3742	3674		3599.79	2848	2856.62		3600.17	3300	3240.02		3600.55	1481	1494.46		3600.93	1427	1358.53		3601.3	1267	1193.28
3719.3	3762	3725.62		3719.79	2895	2908.13		3720.17	3321	3295.68		3720.55	1550	1538.35		3720.92	1485	1395.56		3721.3	1286	1225.88
3839.3	3820	3772.43		3839.79	2930	2956.13		3840.17	3345	3346.97		3840.54	1646	1580.69		3840.92	1524	1431.67		3841.3	1322	1258.23
3959.29	3846	3814.56		3959.78	2966	3000.67		3960.15	3371	3393.96		3960.53	1708	1621.48		3960.91	1532	1466.85		3961.28	1343	1290.33
4079.3	3870	3852.17		4079.78	3016	3041.83		4080.16	3391	3436.77		4080.54	1733	1660.74		4080.91	1588	1501.13		4081.29	1357	1322.21
4199.29	3907	3885.37		4199.77	3061	3079.7		4200.15	3447	3475.5		4200.53	1754	1698.5		4200.9	1604	1534.51		4201.28	1395	1353.89
4319.28	3922	3914.34		4319.77	3077	3114.37		4320.15	3437	3510.27		4320.52	1759	1734.77		4320.9	1575	1567.02		4321.28	1431	1385.39
4439.29	3926	3939.24		4439.78	3109	3145.93		4440.15	3465	3541.21		4440.53	1710	1769.6		4440.91	1535	1598.66		4441.28	1468	1416.72
4559.27	3926	3960.22		4559.76	3134	3174.48		4560.13	3474	3568.46		4560.51	1780	1803.01		4560.89	1524	1629.46		4561.26	1487	1447.88
4679.27	3934	3977.47		4679.76	3145	3200.14		4680.13	3487	3592.17		4680.51	1944	1835.07		4680.89	1555	1659.44		4681.26	1503	1478.92
4799.27	3949	3991.16		4799.75	3188	3223.02		4800.13	3528	3612.49		4800.51	2069	1865.81		4800.89	1601	1688.62		4801.26	1530	1509.82
4919.26	3984	4001.47		4919.75	3225	3243.23		4920.12	3536	3629.58		4920.5	2051	1895.29		4920.88	1623	1717.02		4921.26	1552	1540.6
5039.25	3946	4008.59		5039.74	3229	3260.9		5040.12	3539	3643.6		5040.49	2086	1923.56		5040.87	1692	1744.69		5041.25	1566	1571.28
5159.26	3944	4012.71		5159.75	3207	3276.16		5160.13	3546	3654.71		5160.5	2116	1950.69		5160.88	1763	1771.63		5161.26	1571	1601.85
5279.24	3904	4014		5279.73	3244	3289.11		5280.1	3570	3663.09		5280.48	2195	1976.73		5280.86	1828	1797.87		5281.23	1631	1632.32
5399.24	3928	4012.66		5399.73	3245	3299.91		5400.1	3560	3668.91		5400.48	2154	2001.75		5400.86	1878	1823.46		5401.24	1649	1662.71
5519.24	3904	4008.88		5519.73	3236	3308.67		5520.1	3583	3672.34		5520.48	2133	2025.8		5520.86	1878	1848.41		5521.23	1682	1693.01
5639.23	3901	4002.84		5639.72	3264	3315.53		5640.09	3591	3673.55		5640.47	2071	2048.95		5640.85	1911	1872.74		5641.22	1722	1723.22
5759.23	3896	3994.73		5759.71	3248	3320.6		5760.09	3577	3672.72		5760.47	1877	2071.27		5760.84	1859	1896.5		5761.22	1723	1753.34
5879.23	3873	3984.73		5879.71	3255	3324.03		5880.09	3578	3670.01		5880.47	1833	2092.81		5880.85	1845	1919.71		5881.22	1763	1783.37
5999.21	3892	3973.03		5999.7	3274	3325.94		6000.07	3598	3665.6		6000.45	1819	2113.64		6000.83	1880	1942.39		6001.21	1782	1813.31
6119.21	3866	3959.79		6119.7	3277	3326.45		6120.07	3591	3659.65		6120.45	1841	2133.83		6120.83	1905	1964.58		6121.21	1782	1843.14
6239.21	3848	3945.2		6239.69	3295	3325.7		6240.07	3592	3652.32		6240.45	1868	2153.42		6240.83	1928	1986.3		6241.2	1813	1872.87
6359.2	3843	3929.43		6359.69	3301	3323.79		6360.07	3591	3643.78		6360.44	1900	2172.49		6360.82	1926	2007.58		6361.2	1869	1902.47
6479.19	3826	3912.63		6479.68	3295	3320.86		6480.06	3569	3634.19		6480.44	1983	2191.08		6480.81	1955	2028.44		6481.19	1890	1931.94
6599.2	3824	3894.97		6599.69	3297	3317.01		6600.07	3592	3623.69		6600.44	2066	2209.26		6600.82	1972	2048.91		6601.2	1905	1961.28
6719.18	3814	3876.62		6719.67	3301	3312.36		6720.05	3565	3612.44		6720.42	2139	2227.06		6720.8	1996	2069		6721.18	1934	1990.44
6839.18	3823	3857.7		6839.67	3306	3307.02		6840.05	3589	3600.58		6840.43	2151	2244.54		6840.8	2046	2088.75		6841.18	1935	2019.44
6959.18	3802	3838.37		6959.67	3310	3301.1		6960.05	3586	3588.23		6960.42	2191	2261.75		6960.8	2073	2108.16		6961.18	1956	2048.24
7079.18	3816	3818.76		7079.66	3304	3294.69		7080.04	3575	3575.54		7080.42	2215	2278.72		7080.79	2109	2127.27		7081.17	1986	2076.83
7199.17	3783	3799		7199.66	3277	3287.89		7200.03	3562	3562.62		7200.41	2264	2295.49		7200.79	2147	2146.09		7201.16	2000	2105.19
7319.18	3791	3779.21		7319.67	3282	3280.79		7320.04	3571	3549.59		7320.42	2332	2312.11		7320.8	2152	2164.64		7321.17	2030	2133.29
7439.15	3763	3759.51		7439.64	3269	3273.48		7440.02	3546	3536.56		7440.4	2401	2328.59		7440.77	2194	2182.92		7441.15	2060	2161.1
7559.16	3768	3740.01		7559.65	3282	3266.03		7560.02	3539	3523.63		7560.4	2426	2344.97		7560.78	2235	2200.96		7561.15	2086	2188.61
7679.16	3724	3720.8		7679.64	3281	3258.53		7680.02	3566	3510.9		7680.4	2452	2361.27		7680.78	2244	2218.77		7681.15	2083	2215.79
7799.14	3728	3701.97		7799.63	3275	3251.05		7800.01	3543	3498.45		7800.39	2497	2377.5		7800.76	2257	2236.35		7801.14	2107	2242.6
7919.14	3724	3683.62		7919.63	3276	3243.64		7920.01	3533	3486.36		7920.38	2528	2393.69		7920.76	2297	2253.71		7921.14	2135	2269.02
8039.15	3727	3665.8		8039.64	3260	3236.36		8040.01	3525	3474.7		8040.39	2682	2409.83		8040.77	2296	2270.86		8041.14	2185	2295.03
8159.12	3721	3648.6		8159.61	3253	3229.28		8159.99	3512	3463.53		8160.37	2698	2425.94		8160.74	2304	2287.8		8161.12	2246	2320.58
8279.13	3689	3632.07		8279.61	3225	3222.42		8279.99	3521	3452.91		8280.37	2687	2442.02		8280.75	2308	2304.54		8281.12	2310	2345.64
8399.12	3685	3616.25		8399.61	3252	3215.85		8399.99	3522	3442.87		8400.37	2637	2458.06		8400.74	2295	2321.07		8401.12	2361	2370.2
8519.11	3669	3601.2		8519.6	3231	3209.58		8519.97	3520	3433.47		8520.35	2543	2474.05		8520.73	2324	2337.4		8521.11	2410	2394.2
8639.11	3655	3586.94		8639.6	3249	3203.65		8639.98	3506	3424.71		8640.35	2428	2489.99		8640.73	2361	2353.52		8641.11	2456	2417.62
8759.12	3637	3573.5		8759.6	3238	3198.08		8759.98	3509	3416.64		8760.36	2397	2505.85		8760.74	2344	2369.43		8761.11	2493	2440.42
8879.09	3625	3560.9		8879.58	3248	3192.89		8879.96	3487	3409.25		8880.34	2415	2521.62		8880.72	2352	2385.12		8881.09	2575	2462.58
8999.1	3636	3549.15		8999.58	3245	3188.08		8999.96	3461	3402.56		9000.34	2467	2537.27		9000.72	2425	2400.59		9001.09	2589	2484.05
9119.1	3621	3538.25		9119.58	3233	3183.67		9119.96	3472	3396.55		9120.34	2546	2552.78		9120.71	2462	2415.83		9121.09	2583	2504.81
9239.08	3611	3528.19		9239.57	3222	3179.66		9239.95	3448	3391.22		9240.33	2613	2568.1		9240.7	2442	2430.81		9241.08	2611	2524.81
9359.08	3585	3518.97		9359.57	3208	3176.03		9359.95	3448	3386.56		9360.33	2694	2583.22		9360.7	2456	2445.54		9361.08	2657	2544.03
9479.09	3571	3510.55		9479.58	3216	3172.77		9479.95	3447	3382.52		9480.33	2658	2598.09		9480.71	2634	2460		9481.08	2645	2562.44
9599.07	3562	3502.92		9599.56	3223	3169.88		9599.93	3439	3379.1		9600.31	2646	2612.66		9600.69	2754	2474.17		9601.07	2663	2580
9719.07	3550	3496.04		9719.56	3201	3167.32		9719.93	3418	3376.23		9720.31	2624	2626.9		9720.69	2706	2488.04		9721.07	2683	2596.69
9839.07	3523	3489.87		9839.56	3205	3165.08		9839.93	3410	3373.88		9840.31	2599	2640.75		9840.69	2596	2501.59		9841.07	2650	2612.47
9959.06	3519	3484.37		9959.55	3188	3163.12		9959.92	3406	3372		9960.3	2616	2654.17		9960.68	2485	2514.81		9961.05	2707	2627.32
10079	3481	3479.48		10079.5	3175	3161.41		10079.9	3393	3370.53		10080.3	2617	2667.1		10080.7	2470	2527.66		10081	2885	2641.2
10199	3512	3475.14		10199.5	3180	3159.9		10199.9	3388	3369.4		10200.3	2582	2679.5		10200.7	2452	2540.14		10201	3102	2654.11
10319	3514	3471.3		10319.5	3171	3158.57		10319.9	3385	3368.57		10320.3	2610	2691.31		10320.6	2514	2552.22		10321	3116	2666
10439	3477	3467.89		10439.5	3175	3157.36		10439.9	3366	3367.95		10440.3	2618	2702.47		10440.7	2597	2563.88		10441	2968	2676.88
10559	3491	3464.84		10559.5	3157	3156.22		10559.9	3366	3367.46		10560.3	2620	2712.94		10560.6	2672	2575.1		10561	2819	2686.71
10679	3470	3462.08		10679.5	3168	3155.11		10679.9	3351	3367.05		10680.3	2645	2722.64		10680.6	2721	2585.86		10681	2675	2695.48
10799	3451	3459.54		10799.5	3155	3153.97		10799.9	3357	3366.62		10800.3	2649	2731.54		10800.6	2695	2596.13		10801	2657	2703.19
10919	3454	3457.13		10919.5	3136	3152.75		10919.9	3344	3366.11		10920.3	2672	2739.57		10920.6	2614	2605.9		10921	2703	2709.82
11039	3422	3454.78		11039.5	3146	3151.4		11039.9	3340	3365.42		11040.2	2673	2746.68		11040.6	2549	2615.15		11041	2685	2715.36
11159	3446	3452.41		11159.5	3113	3149.85		11159.9	3339	3364.48		11160.3	2689	2752.83		11160.6	2557	2623.84		11161	2648	2719.82
11279	3420	3449.94		11279.5	3124	3148.05		11279.9	3328	3363.21		11280.2	2746	2757.95		11280.6	2564	2631.97		11281	2627	2723.2
11399	3427	3447.29		11399.5	3107	3145.95		11399.8	3313	3361.52		11400.2	2862	2762.01		11400.6	2541	2639.52		11401	2689	2725.5
11519	3393	3444.38		11519.5	3136	3143.49		11519.9	3322	3359.35		11520.2	2940	2764.95		11520.6	2534	2646.46		11521	2686	2726.75
11639	3390	3441.14		11639.5	3111	3140.63		11639.9	3307	3356.62		11640.2	2935	2766.76		11640.6	2546	2652.78		11641	2645	2726.94
11759	3398	3437.5		11759.5	3117	3137.29		11759.8	3292	3353.26		11760.2	2859	2767.38		11760.6	2558	2658.47		11761	2598	2726.12
11879	3391	3433.38		11879.5	3091	3133.45		11879.8	3305	3349.21		11880.2	2813	2766.79		11880.6	2594	2663.51		11881	2626	2724.29
11999	3389	3428.72		11999.5	3080	3129.05		11999.8	3295	3344.39		12000.2	2848	2764.96		12000.6	2548	2667.88		12001	2568	2721.5
12119	3368	3423.47		12119.4	3064	3124.06		12119.8	3284	3338.78		12120.2	2844	2761.88		12120.6	2544	2671.59		12121	2531	2717.78
12239	3364	3417.56		12239.5	3083	3118.43		12239.8	3269	3332.3		12240.2	2823	2757.54		12240.6	2606	2674.63		12241	2505	2713.18
12359	3341	3410.95		12359.4	3066	3112.13		12359.8	3252	3324.94		12360.2	2811	2751.94		12360.6	2624	2676.98		12361	2570	2707.76
12478.9	3352	3403.61		12479.4	3061	3105.15		12479.8	3271	3316.67		12480.2	2701	2745.08		12480.6	2655	2678.66		12480.9	2565	2701.56
12598.9	3341	3395.5		12599.4	3057	3097.45		12599.8	3234	3307.46		12600.2	2690	2736.97		12600.6	2717	2679.66		12600.9	2618	2694.65
12718.9	3328	3386.61		12719.4	3064	3089.03		12719.8	3249	3297.31		12720.2	2655	2727.65		12720.6	2773	2680		12720.9	2578	2687.12
12838.9	3306	3376.92		12839.4	3057	3079.89		12839.8	3238	3286.23		12840.2	2617	2717.15		12840.5	2788	2679.67		12840.9	2571	2679.04
12958.9	3309	3366.44		12959.4	3039	3070.03		12959.8	3231	3274.25		12960.2	2607	2705.52		12960.6	2769	2678.7		12960.9	2566	2670.5
13078.9	3275	3355.2		13079.4	3040	3059.47		13079.8	3230	3261.4		13080.2	2624	2692.82		13080.5	2686	2677.11		13080.9	2516	2661.6
13198.9	3271	3343.21		13199.4	3031	3048.23		13199.8	3214	3247.74		13200.2	2644	2679.12		13200.5	2686	2674.92		13200.9	2523	2652.45
13318.9	3289	3330.53		13319.4	3017	3036.36		13319.8	3205	3233.33		13320.2	2662	2664.51		13320.5	2689	2672.16		13320.9	2592	2643.16
13438.9	3281	3317.21		13439.4	3013	3023.91		13439.8	3209	3218.28		13440.1	2619	2649.1		13440.5	2671	2668.86		13440.9	2636	2633.87
13558.9	3268	3303.35		13559.4	3016	3010.93		13559.8	3184	3202.7		13560.1	2608	2633.01		13560.5	2635	2665.07		13560.9	2656	2624.71
13678.9	3297	3289.04		13679.4	2981	2997.51		13679.8	3196	3186.71		13680.2	2554	2616.36		13680.5	2660	2660.83		13680.9	2666	2615.83
13798.9	3274	3274.4		13799.4	2984	2983.75		13799.8	3190	3170.48		13800.1	2594	2599.31		13800.5	2697	2656.21		13800.9	2673	2607.39
13918.9	3312	3259.58		13919.4	2975	2969.75		13919.8	3175	3154.18		13920.1	2580	2582.05		13920.5	2656	2651.25		13920.9	2701	2599.56
14038.9	3269	3244.73		14039.4	2963	2955.64		14039.8	3174	3138.04		14040.1	2554	2564.75		14040.5	2650	2646.02		14040.9	2675	2592.52
14158.9	3272	3230.06		14159.4	2968	2941.58		14159.7	3158	3122.28		14160.1	2528	2547.64		14160.5	2618	2640.62		14160.9	2688	2586.48
14278.9	3262	3215.77		14279.4	2963	2927.71		14279.7	3156	3107.16		14280.1	2516	2530.95		14280.5	2586	2635.11		14280.9	2667	2581.63
14398.9	3277	3202.11		14399.4	2954	2914.24		14399.7	3125	3093		14400.1	2517	2514.94		14400.5	2552	2629.59		14400.9	2660	2578.2
14518.9	3264	3189.34		14519.3	2950	2901.37		14519.7	3140	3080.11		14520.1	2504	2499.89		14520.5	2569	2624.17		14520.9	2658	2576.42
14638.9	3257	3177.77		14639.3	2943	2889.34		14639.7	3162	3068.86		14640.1	2520	2486.1		14640.5	2628	2618.95		14640.8	2662	2576.54
14758.9	3248	3167.73		14759.3	2921	2878.38		14759.7	3122	3059.64		14760.1	2512	2473.92		14760.5	2702	2614.06		14760.9	2658	2578.83
14878.8	3246	3159.59		14879.3	2915	2868.8		14879.7	3129	3052.9		14880.1	2516	2463.7		14880.5	2711	2609.62		14880.8	2664	2583.56
14998.8	3239	3153.73		14999.3	2894	2860.88		14999.7	3104	3049.11		15000.1	2522	2455.84		15000.5	2665	2605.79		15000.8	2682	2591.02
15118.8	3222	3150.61		15119.3	2907	2854.97		15119.7	3105	3048.78		15120.1	2513	2450.74		15120.5	2663	2602.71		15120.8	2664	2601.54
15238.8	3197	3150.69		15239.3	2880	2851.43		15239.7	3110	3052.47		15240.1	2516	2448.88		15240.4	2643	2600.55		15240.8	2692	2615.42
15358.8	3177	3154.48		15359.3	2877	2850.65		15359.7	3094	3060.79		15360.1	2458	2450.71		15360.4	2628	2599.48		15360.8	2662	2633.02
15478.8	3166	3162.54		15479.3	2880	2853.06		15479.7	3093	3074.39		15480.1	2474	2456.77		15480.4	2608	2599.7		15480.8	2670	2654.69
15598.8	3150	3175.47		15599.3	2850	2859.1		15599.7	3078	3093.96		15600.1	2487	2467.6		15600.4	2583	2601.41		15600.8	2661	2680.81
15718.8	3155	3193.89		15719.3	2823	2869.28		15719.7	3081	3120.25		15720.1	2465	2483.8		15720.4	2584	2604.83		15720.8	2633	2711.78
15838.8	3122	3218.5		15839.3	2822	2884.1		15839.7	3052	3154.07		15840.1	2475	2505.97		15840.4	2567	2610.18		15840.8	2650	2748.01
15958.8	3121	3250.04		15959.3	2822	2904.15		15959.7	3072	3196.25		15960	2432	2534.79		15960.4	2537	2617.71		15960.8	2623	2789.94

## Sheet: Rate Parameters
Actin #1										FF ICD #1
Minimum intensity: 0										Minimum intensity: 0
Maximum intensity: 4002.5										Maximum intensity: 2762.4
Total actin concentration: 4										Total actin concentration: 4
Barbed end elongation rate Kon: 11.6										Barbed end elongation rate Kon: 11.6
Barbed end elongation off-rate Koff: 1.3										Barbed end elongation off-rate Koff: 1.3
Window: 0.06										Window: 0.06
Slope_t50_method: y-interval										Slope_t50_method: y-interval
Results:										Results:
Average maximum intensity: 4002.5										Average maximum intensity: 2762.4
Minimum intensity: 0.0										Minimum intensity: 0.0
Actin polymerization rate at t50: 0.0011292909044546004										Actin polymerization rate at t50: 0.000558408452047486
Barbed ends at t50: 5.0079419266279395e-05										Barbed ends at t50: 2.4763124259312014e-05
t50: 1553.3311699900553										t50: 3315.6997918911734
Intensity at t50: 2057.319504310345										Intensity at t50: 1419.8974137931036
Slope line at t50: [1.162568678557043, 195.39583434319601]										Slope line at t50: [0.3967527958327564, 65.68683742508837]
R^2 value of t50 slope line: 0.9998944437720114										R^2 value of t50 slope line: 0.999153852280118
Points to calculate t50 [[1439.426, 1559.434, 1679.412], [1868.0, 2010.0, 2147.0]]										Points to calculate t50 [[3000.593, 3120.584, 3240.563, 3360.565, 3480.549, 3600.548, 3720.546], [1252.0, 1304.0, 1354.0, 1402.0, 1449.0, 1494.0, 1538.0]]
Points to calculate maximum intensity: [[], []]										Points to calculate maximum intensity: [[], []]
actin #2										FF ICD #2
Minimum intensity: 0										Minimum intensity: 0
Maximum intensity: 3321										Maximum intensity: 2676.7
Total actin concentration: 4										Total actin concentration: 4
Barbed end elongation rate Kon: 11.6										Barbed end elongation rate Kon: 11.6
Barbed end elongation off-rate Koff: 1.3										Barbed end elongation off-rate Koff: 1.3
Window: 0.06										Window: 0.06
Slope_t50_method: y-interval										Slope_t50_method: y-interval
Results:										Results:
Average maximum intensity: 3321.0										Average maximum intensity: 2676.7
Minimum intensity: 0.0										Minimum intensity: 0.0
Actin polymerization rate at t50: 0.0010146161757920657										Actin polymerization rate at t50: 0.0004599852345624746
Barbed ends at t50: 4.4994065445324415e-05										Barbed ends at t50: 2.0398458295453416e-05
t50: 1804.7090255127266										t50: 3543.6146953111647
Intensity at t50: 1707.022629310345										Intensity at t50: 1375.8468750000002
Slope line at t50: [0.86666668979475, 96.4188028161761]										Slope line at t50: [0.31668320925275295, 216.14672593364392]
R^2 value of t50 slope line: 0.9999692358033297										R^2 value of t50 slope line: 0.9993074728519015
Points to calculate t50 [[1679.901, 1799.902, 1919.901], [1552.0, 1657.0, 1760.0]]										Points to calculate t50 [[3120.961, 3240.94, 3360.942, 3480.926, 3600.925, 3720.923, 3840.92, 3960.908], [1201.0, 1242.0, 1282.0, 1321.0, 1359.0, 1396.0, 1432.0, 1467.0]]
Points to calculate maximum intensity: [[], []]										Points to calculate maximum intensity: [[], []]
actin #3										FF ICD #3
Minimum intensity: 1										Minimum intensity: 1
Maximum intensity: 3664.6										Maximum intensity: 2727
Total actin concentration: 4										Total actin concentration: 4
Barbed end elongation rate Kon: 11.6										Barbed end elongation rate Kon: 11.6
Barbed end elongation off-rate Koff: 1.3										Barbed end elongation off-rate Koff: 1.3
Window: 0.06										Window: 0.06
Slope_t50_method: y-interval										Slope_t50_method: y-interval
Results:										Results:
Average maximum intensity: 3664.6										Average maximum intensity: 2727.0
Minimum intensity: 1.0										Minimum intensity: 1.0
Actin polymerization rate at t50: 0.0010789758349632312										Actin polymerization rate at t50: 0.0003752300063006941
Barbed ends at t50: 4.7848152326529096e-05										Barbed ends at t50: 1.6639911587613928e-05
t50: 1760.2499226413345										t50: 4242.655717038249
Intensity at t50: 1884.121982758621										Intensity at t50: 1402.1875000000002
Slope line at t50: [1.0167196470081377, 43.11932000600063]										Slope line at t50: [0.26309031412944633, 247.7983746613157]
R^2 value of t50 slope line: 0.9998782991963097										R^2 value of t50 slope line: 0.999955966366467
Points to calculate t50 [[1560.299, 1680.279, 1800.279, 1920.278], [1628.0, 1753.0, 1875.0, 1994.0]]										Points to calculate t50 [[3721.3, 3841.297, 3961.285, 4081.292, 4201.282, 4321.276, 4441.284, 4561.264, 4681.263, 4801.262], [1226.0, 1258.0, 1290.0, 1322.0, 1354.0, 1385.0, 1417.0, 1448.0, 1479.0, 1510.0]]
Points to calculate maximum intensity: [[], []]										Points to calculate maximum intensity: [[], []]
	Actin slopes			FF ICD Slopes
	0.00112929			0.000558408
	0.00101462			0.000459985
	0.00107898			0.00037523
avg	0.00107429			0.000464541
std dev	5.74805e-05			9.16742e-05
	t-Test: Paired Two Sample for Means
		Variable 1	Variable 2
	Mean	0.00107429	0.000464541
	Variance	3.30401e-09	8.40415e-09
	Observations	3	3
	Pearson Correlation	0.475963
	Hypothesized Mean Difference	0
	df	2
	t Stat	12.9103
	P(T<=t) one-tail	0.0029731
	t Critical one-tail	2.91999
	P(T<=t) two-tail	0.00594621
	t Critical two-tail	4.30265
	**
