# Supplementary material for: The intrinsically disordered cytoplasmic tail of a dendrite branching receptor uses two distinct mechanisms to regulate the actin cytoskeleton
Source: eLife journal article supplement (doi:10.7554/elife.88492), 2023-07-17
Supplement: fig5-figsupp1-data2 [file Figure 5 - figure supplement 1F Source Data.xlsx]

## Sheet: Sheet1
Quantification
	Concentration of HPO-30-GST	WRC Intensity	Relative to 1.75uM HPO-30GST WRC Signal (wo Rac)			Concentration of HPO-30-GST	WRC Intensity	Relative to 1.75uM HPO-30GST WRC Signal (wo Rac)			Concentration of HPO-30-GST	WRC Intensity	Relative to 1.75uM HPO-30GST WRC Signal (wo Rac)		Avg	std dev
WRC alone	1.75	31413	1		WRC alone	1.75	33768.7	1		WRC alone	1.75	35156.3	1		1	0
WRC alone	17.5	12023.3	0.382748		WRC alone	17.5	10651.8	0.315433		WRC alone	17.5	14184.9	0.403482		0.367221	0.0460322
WRC + Rac	1.75	31662.8	1.00795		WRC + Rac	1.75	31045.3	0.919351		WRC + Rac	1.75	31619.3	0.899392		0.942231	0.0577832
WRC + Rac	17.5	6433.22	0.204795		WRC + Rac	17.5	7496.53	0.221996		WRC + Rac	17.5	7959.17	0.226394		0.217728	0.0114146
