# Supplementary material for: The intrinsically disordered cytoplasmic tail of a dendrite branching receptor uses two distinct mechanisms to regulate the actin cytoskeleton
Source: eLife journal article supplement (doi:10.7554/elife.88492), 2023-07-17
Supplement: fig6-data2 [file Figure 6B Source Data.xlsx]

## Sheet: Quantification
			without actin							with actin					"Corrected" %P - %P with actin - %P wo Actin
	Sup Int	Pel Inten	Total Int	% Sup	% Pel			Sup Int	Pel Inten	Total Int	% Sup	% Pel			cP
BSA #1	108704	8574.17	117278	92.689	7.31099		BSA #1	110169	9628.26	119797	91.9629	8.03713			0.726142
BSA #2	153010	8844.55	161854	94.5355	5.46452		BSA #2	185032	10606.8	195639	94.5784	5.42161			-0.0429136
BSA #3	133771	9300.92	143072	93.4991	6.50088		BSA #3	153379	12977.7	166356	92.1989	7.80112			1.30025
														avg	0.661159
			without actin							with actin				std dev	0.673934
	Sup Int	Pel Inten	Total Int	% Sup	% Pel			Sup Int	Pel Inten	Total Int	% Sup	% Pel
F/F-H DMSO #1	134358	4229.93	138588	96.9478	3.05216		F/F-H DMSO #1	114585	41254	155839	73.5278	26.4722			23.4201
F/F-H DMSO #2	158106	9924.58	168030	94.0936	5.90643		F/F-H DMSO #2	152231	46100.4	198331	76.7558	23.2442			17.3377
F/F-H DMSO #3	100609	5578.66	106188	94.7464	5.25359		F/F-H DMSO #3	95500.1	42247.4	137747	69.3298	30.6702			25.4166
														avg	22.0581
			without actin							with actin				std dev	4.20809
	Sup Int	Pel Inten	Total Int	% Sup	% Pel			Sup Int	Pel Inten	Total Int	% Sup	% Pel
F/F-H Rap #1	133279	4207.93	137487	96.9394	3.06061		F/F-H Rap #1	124245	76082.8	200328	62.0208	37.9792			34.9185
F/F-H Rap #2	157255	9162.75	166417	94.4941	5.50589		F/F-H Rap #2	145006	79914.7	224921	64.4699	35.5301			30.0243
F/F-H Rap #3	100013	4453.47	104466	95.7369	4.26307		F/F-H Rap #3	132144	58297.3	190441	69.3883	30.6117			26.3486
														avg	30.4305
			without actin							with actin				std dev	4.29938
	Sup Int	Pel Inten	Total Int	% Sup	% Pel			Sup Int	Pel Inten	Total Int	% Sup	% Pel
F/F-Tag DMSO #1	191797	10416.6	202213	94.8487	5.15131		F/F-Tag DMSO #1	194694	17011.7	211705	91.9644	8.03557			2.88425
F/F-Tag DMSO #2	152922	13425.6	166348	91.9292	8.0708		F/F-Tag DMSO #2	150746	14205.6	164951	91.388	8.61201			0.541208
F/F-Tag DMSO #3	140991	6414.53	147405	95.6484	4.35163		F/F-Tag DMSO #3	138110	11864.7	149975	92.0889	7.91111			3.55948
														avg	2.32831
			without actin							with actin				std dev	1.58407
	Sup Int	Pel Inten	Total Int	% Sup	% Pel			Sup Int	Pel Inten	Total Int	% Sup	% Pel
F/F-Tag Rap #1	194272	5217.58	199489	97.3845	2.61547		F/F-Tag Rap #1	186834	28597.5	215432	86.7255	13.2745			10.659
F/F-Tag Rap #2	153636	6184.62	159820	96.1303	3.86973		F/F-Tag Rap #2	144668	24988.9	169657	85.2709	14.7291			10.8594
F/F-Tag Rap #3	124880	6507.91	131387	95.0468	4.95322		F/F-Tag Rap #3	124692	15765.1	140457	88.7758	11.2242			6.27094
														avg	9.26311
			without actin							with actin				std dev	2.59323
	Sup Int	Pel Inten	Total Int	% Sup	% Pel			Sup Int	Pel Inten	Total Int	% Sup	% Pel
SNAP-CapZ #1	98929	3135.73	102065	96.9277	3.0723		SNAP-CapZ #1	94575.3	15958.4	110534	85.5624	14.4376			11.3653
SNAP-CapZ #2	106904	3699.87	110604	96.6548	3.34516		SNAP-CapZ #2	106720	11510.8	118230	90.2641	9.7359			6.39073
SNAP-CapZ #3	88260.4	2667.85	90928.2	97.066	2.93402		SNAP-CapZ #3	92023.9	8037.7	100062	91.9672	8.03276			5.09874
														avg	7.61825
														std dev	3.30869

## Sheet: Statistics
								* for p< .05
		c%P						** for p<.01
BSA #1	A	0.726142						*** for p<.001
BSA #2	A	-0.0429136
BSA #3	A	1.30025			diff	lwr	upr	p
F/F-H DMSO #1	B	23.4201		B-A	21.397	12.9566	29.8373	2.29e-05	***
F/F-H DMSO #2	B	17.3377		C-A	29.7693	21.329	38.2097	7e-07	***
F/F-H DMSO #3	B	25.4166		D-A	1.66715	-6.77321	10.1075	0.982868
F/F-H Rap #1	C	34.9185		E-A	8.60195	0.161581	17.0423	0.0448885	*
F/F-H Rap #2	C	30.0243		F-A	6.95709	-1.48328	15.3975	0.13128
F/F-H Rap #3	C	26.3486		C-B	8.37235	-0.0680199	16.8127	0.0523171
F/F-Tag DMSO #1	D	2.88425		D-B	-19.7298	-28.1702	-11.2894	5.22e-05	***
F/F-Tag DMSO #2	D	0.541208		E-B	-12.795	-21.2354	-4.35466	0.0027905	**
F/F-Tag DMSO #3	D	3.55948		F-B	-14.4399	-22.8802	-5.99952	0.0010004	**
F/F-Tag Rap #1	E	10.659		D-C	-28.1022	-36.5425	-19.6618	1.3e-06	***
F/F-Tag Rap #2	E	10.8594		E-C	-21.1674	-29.6077	-12.727	2.55e-05	***
F/F-Tag Rap #3	E	6.27094		F-C	-22.8122	-31.2526	-14.3719	1.17e-05	***
SNAP-CapZ #1	F	11.3653		E-D	6.93479	-1.50557	15.3752	0.13313
SNAP-CapZ #2	F	6.39073		F-D	5.28993	-3.15043	13.7303	0.345874
SNAP-CapZ #3	F	5.09874		F-E	-1.64486	-10.0852	6.79551	0.983847
