# Supplementary material for: The intrinsically disordered cytoplasmic tail of a dendrite branching receptor uses two distinct mechanisms to regulate the actin cytoskeleton
Source: eLife journal article supplement (doi:10.7554/elife.88492), 2023-07-17
Supplement: fig6-data2 [file Figure 6C Source Data.xlsx]

## Sheet: Sheet1
NOTE: values under the condition name represent RFU
time (s)	actin + rap	250nM SNAP-CapZ + dmso	1uM F/F-tag + dmso	1uM F/F-tag + rap	1uM F/F-H + dmso	1uM F/F-H + rap
0	14753	14753	14753	14753	14753	14753
1.264	14702	14786	14483	14573	14667	14762
3.268	14420	14842	14211	14353	14412	14715
5.248	14124	14823	13988	14056	14184	14672
7.254	13817	14858	13699	13849	14016	14660
9.258	13596	14772	13496	13641	13835	14694
11.262	13256	14845	13305	13417	13671	14663
13.266	13051	14829	13021	13215	13511	14620
15.267	12782	14724	12919	13014	13345	14627
17.262	12528	14777	12631	12800	13172	14615
19.26	12281	14717	12427	12651	13059	14613
21.257	12119	14702	12310	12494	12880	14613
23.265	11889	14686	12104	12327	12741	14527
25.259	11715	14709	11962	12189	12580	14542
27.265	11533	14653	11764	12042	12473	14545
29.273	11312	14640	11583	11894	12343	14480
31.271	11170	14632	11468	11742	12250	14488
33.275	11028	14578	11311	11643	12130	14463
35.272	10847	14535	11160	11534	12020	14458
37.279	10679	14529	11025	11383	11920	14409
39.277	10563	14525	10872	11285	11800	14403
41.278	10363	14470	10759	11160	11731	14403
43.29	10235	14442	10651	11073	11615	14390
45.288	10125	14428	10502	10962	11528	14355
47.288	10013	14389	10380	10878	11416	14346
49.294	9916	14364	10288	10763	11357	14362
51.29	9795	14343	10216	10689	11274	14318
53.292	9678	14283	10110	10617	11224	14291
55.3	9597	14292	9968	10548	11120	14248
57.29	9475	14282	9887	10461	11036	14267
59.302	9376	14248	9856	10413	10950	14218
61.305	9319	14207	9708	10328	10893	14264
63.317	9209	14212	9614	10242	10797	14263
65.301	9126	14188	9526	10178	10739	14199
67.307	9042	14161	9474	10112	10701	14181
69.313	8974	14092	9384	10037	10623	14164
71.315	8896	14110	9303	9994	10562	14143
73.318	8819	14029	9226	9908	10546	14138
75.328	8740	14027	9165	9907	10441	14117
77.321	8677	14025	9118	9822	10417	14150
79.324	8612	14009	9008	9766	10364	14147
81.334	8545	13979	8967	9700	10310	14115
83.33	8485	13904	8883	9648	10249	14058
85.331	8432	13923	8855	9598	10206	14085
87.343	8375	13869	8787	9552	10141	14060
89.343	8323	13857	8720	9499	10076	14070
91.335	8255	13864	8696	9464	10067	14051
93.343	8171	13839	8598	9416	10050	14014
95.357	8163	13824	8550	9387	9988	14055
97.334	8098	13744	8534	9332	9939	14023
99.339	8063	13751	8481	9297	9902	13961
101.347	8001	13758	8438	9276	9864	13972
103.347	7943	13668	8394	9218	9817	13951
105.346	7892	13691	8329	9167	9807	13949
107.354	7870	13647	8294	9141	9760	13976
109.355	7843	13651	8268	9120	9719	13983
111.339	7782	13590	8223	9076	9699	13933
113.327	7715	13576	8144	9026	9657	13946
115.328	7680	13569	8121	9018	9612	13914
117.322	7648	13581	8084	8965	9601	13903
119.33	7606	13554	8049	8948	9554	13850
121.334	7566	13547	7996	8922	9504	13859
123.334	7536	13499	7964	8881	9462	13869
125.331	7474	13502	7938	8859	9451	13865
127.342	7466	13444	7886	8808	9416	13845
129.344	7417	13427	7863	8799	9368	13821
131.339	7386	13433	7819	8736	9362	13776
133.345	7356	13404	7812	8748	9351	13829
135.342	7293	13347	7748	8676	9317	13762
137.345	7285	13331	7738	8693	9309	13740
139.352	7265	13314	7689	8649	9266	13719
141.356	7224	13293	7655	8636	9247	13772
143.354	7188	13280	7640	8598	9203	13716
145.356	7151	13234	7592	8580	9192	13711
147.366	7105	13239	7580	8558	9171	13652
149.364	7088	13189	7543	8536	9137	13694
151.366	7071	13217	7484	8521	9095	13693
153.372	7043	13123	7490	8497	9082	13667
155.371	7014	13132	7480	8460	9051	13685
157.374	7000	13087	7445	8460	9062	13654
159.374	6972	13087	7416	8436	9043	13659
161.373	6924	13070	7376	8416	9018	13641
163.372	6896	13044	7357	8397	8983	13636
165.378	6868	13004	7349	8351	8971	13638
167.387	6878	12989	7293	8350	8958	13608
169.383	6833	12958	7268	8324	8943	13595
171.384	6817	12990	7256	8314	8920	13582
173.388	6798	12903	7243	8302	8916	13580
175.384	6749	12886	7212	8278	8869	13582
177.386	6745	12871	7205	8272	8858	13524
179.396	6709	12841	7145	8241	8849	13552
181.394	6686	12819	7145	8242	8831	13536
183.403	6679	12819	7141	8227	8834	13497
185.398	6644	12767	7119	8192	8789	13503
187.404	6625	12758	7094	8194	8788	13500
189.402	6598	12757	7048	8185	8776	13473
191.406	6564	12726	7061	8158	8751	13465
193.407	6539	12691	7013	8134	8751	13489
195.407	6547	12657	7012	8109	8719	13470
197.413	6514	12684	6983	8138	8711	13428
199.415	6493	12627	6970	8093	8691	13430
201.409	6478	12625	6932	8099	8682	13432
203.418	6455	12622	6932	8068	8681	13400
205.416	6426	12577	6924	8064	8658	13416
207.415	6426	12517	6908	8036	8649	13440
209.419	6387	12542	6881	8027	8624	13367
211.418	6382	12537	6871	8031	8618	13401
213.426	6357	12511	6840	8026	8589	13399
215.408	6345	12481	6839	7998	8579	13331
217.414	6305	12458	6801	7979	8574	13345
219.42	6307	12464	6781	7964	8561	13360
221.418	6292	12395	6755	7956	8554	13333
223.412	6274	12405	6767	7951	8547	13337
225.419	6245	12364	6760	7953	8537	13331
227.42	6246	12378	6756	7939	8526	13313
229.417	6215	12296	6705	7926	8519	13279
231.419	6212	12323	6711	7900	8491	13278
233.421	6187	12301	6680	7899	8507	13269
235.422	6177	12290	6672	7887	8480	13271
237.425	6163	12274	6678	7880	8462	13291
239.429	6134	12250	6645	7859	8459	13221
241.435	6127	12247	6630	7872	8442	13258
243.434	6105	12188	6628	7861	8429	13217
245.436	6106	12178	6587	7852	8400	13215
247.431	6073	12149	6581	7835	8394	13218
249.434	6067	12140	6584	7833	8393	13183
251.44	6047	12122	6574	7819	8388	13212
253.428	6039	12128	6553	7794	8376	13146
255.435	6027	12110	6555	7814	8364	13184
257.43	6032	12058	6519	7782	8344	13192
259.436	6011	12052	6519	7760	8353	13139
261.432	5997	12012	6522	7757	8337	13132
263.431	5967	12012	6494	7750	8343	13106
265.437	5966	12004	6495	7745	8316	13154
267.444	5959	11971	6465	7731	8306	13134
269.439	5939	11980	6443	7718	8314	13118
271.448	5918	11958	6462	7721	8335	13112
273.439	5896	11937	6433	7691	8305	13097
275.448	5899	11889	6425	7698	8284	13128
277.447	5892	11894	6403	7675	8279	13085
279.449	5884	11856	6400	7677	8264	13078
281.453	5860	11837	6397	7653	8280	13111
283.456	5852	11858	6395	7658	8264	13037
285.46	5831	11835	6382	7633	8265	13042
287.455	5828	11837	6363	7634	8248	13053
289.462	5799	11775	6361	7626	8232	13019
291.466	5798	11749	6321	7611	8236	13027
293.466	5780	11703	6323	7618	8224	12984
295.469	5804	11720	6325	7604	8213	13034
297.474	5769	11705	6327	7606	8217	13022
299.478	5775	11692	6317	7590	8219	12964
301.478	5750	11681	6298	7573	8204	12994
303.479	5752	11647	6285	7559	8178	12954
305.479	5721	11588	6275	7565	8197	12943
307.476	5729	11591	6269	7573	8179	12986
309.49	5697	11599	6241	7557	8159	12948
311.491	5702	11545	6250	7543	8155	12946
313.495	5684	11576	6241	7528	8141	12947
315.492	5674	11519	6231	7524	8126	12950
317.501	5687	11527	6213	7533	8115	12914
319.485	5658	11512	6204	7520	8122	12922
321.475	5666	11506	6187	7502	8112	12901
323.474	5649	11455	6190	7505	8121	12924
325.478	5606	11434	6168	7497	8104	12860
327.482	5599	11416	6175	7493	8086	12870
329.478	5617	11372	6158	7494	8078	12881
331.484	5620	11374	6162	7492	8072	12863
333.468	5617	11377	6139	7477	8067	12829
335.455	5573	11300	6126	7479	8063	12860
337.462	5584	11305	6136	7466	8038	12865
339.464	5588	11350	6116	7451	8027	12823
341.464	5553	11300	6106	7458	8045	12827
343.468	5561	11238	6105	7439	8052	12830
345.467	5547	11288	6114	7441	8026	12825
347.469	5552	11195	6086	7421	8013	12826
349.471	5536	11225	6078	7418	8016	12759
351.483	5504	11220	6070	7414	8014	12806
353.473	5521	11169	6058	7411	8015	12775
355.474	5519	11155	6079	7402	8000	12785
357.491	5474	11114	6059	7400	7982	12761
359.477	5495	11105	6035	7396	8002	12789
361.482	5453	11109	6044	7398	7972	12747
363.47	5477	11090	6053	7410	7973	12735
365.468	5468	11111	6027	7383	7966	12748
367.471	5451	11012	6005	7374	7972	12748
369.474	5455	11048	5995	7367	7965	12729
371.48	5429	11033	6002	7377	7944	12716
373.478	5414	11006	5992	7384	7947	12706
375.479	5419	10997	5980	7372	7939	12712
377.49	5404	11015	5991	7369	7928	12672
379.476	5418	10982	5987	7363	7928	12711
381.486	5421	10988	5970	7334	7925	12687
383.497	5374	11000	5964	7345	7930	12628
385.473	5369	10951	5970	7334	7901	12660
387.477	5355	10907	5962	7325	7903	12687
389.481	5360	10904	5940	7323	7900	12670
391.467	5367	10912	5960	7296	7894	12638
393.474	5354	10870	5930	7302	7893	12678
395.477	5337	10870	5935	7303	7893	12631
397.489	5323	10838	5934	7278	7892	12670
399.478	5313	10846	5904	7301	7884	12616
401.48	5324	10818	5893	7284	7874	12609
403.478	5301	10814	5904	7260	7882	12617
405.476	5311	10774	5888	7261	7864	12597
407.473	5301	10765	5883	7266	7867	12601
409.484	5280	10751	5885	7270	7855	12555
411.478	5297	10765	5880	7252	7854	12623
413.477	5281	10716	5876	7250	7851	12626
415.485	5265	10703	5870	7257	7851	12574
417.48	5265	10705	5853	7238	7849	12561
419.467	5238	10678	5845	7231	7841	12553
421.473	5248	10642	5840	7228	7831	12567
423.485	5239	10619	5844	7235	7839	12556
425.476	5249	10645	5824	7228	7845	12565
427.479	5225	10578	5842	7222	7834	12543
429.487	5245	10555	5808	7213	7815	12572
431.477	5218	10563	5826	7207	7816	12530
433.485	5224	10543	5810	7204	7814	12517
435.496	5197	10505	5812	7206	7805	12501
437.493	5191	10501	5791	7219	7795	12500
439.488	5181	10475	5780	7224	7800	12523
441.487	5194	10453	5776	7207	7804	12546
443.498	5194	10472	5781	7191	7799	12484
445.493	5170	10448	5793	7206	7779	12467
447.48	5172	10402	5748	7192	7773	12471
449.49	5161	10405	5765	7175	7776	12462
451.472	5174	10406	5773	7173	7778	12478
453.485	5145	10342	5742	7181	7770	12487
455.497	5146	10361	5781	7161	7770	12444
457.49	5124	10326	5744	7166	7762	12450
459.492	5120	10285	5724	7150	7762	12424
461.503	5124	10336	5731	7146	7769	12462
463.501	5122	10295	5747	7145	7756	12468
465.5	5121	10276	5721	7150	7743	12445
467.507	5099	10256	5724	7133	7749	12464
469.509	5103	10270	5710	7143	7754	12421
471.487	5093	10262	5711	7152	7757	12408
473.492	5088	10221	5692	7132	7739	12427
475.5	5088	10206	5717	7140	7728	12388
477.495	5077	10210	5682	7124	7736	12407
479.496	5066	10189	5693	7126	7710	12397
481.506	5075	10162	5680	7123	7718	12368
483.496	5077	10174	5703	7112	7743	12404
485.499	5067	10194	5697	7110	7716	12381
487.513	5049	10131	5664	7114	7714	12388
489.508	5049	10107	5655	7098	7705	12386
491.505	5040	10150	5653	7097	7699	12388
493.499	5025	10115	5657	7110	7714	12374
495.505	5027	10072	5641	7100	7697	12419
497.501	5015	10050	5654	7097	7699	12325
499.506	5010	10051	5655	7105	7687	12347
501.493	5010	10051	5644	7091	7670	12358
503.493	5011	9993	5622	7084	7684	12314
505.492	4996	9992	5633	7075	7668	12321
507.497	4984	9986	5610	7081	7672	12318
509.492	4995	9993	5617	7082	7657	12320
511.501	4967	9961	5611	7081	7656	12298
513.507	4976	9971	5612	7066	7655	12309
515.507	4959	9929	5595	7047	7668	12347
517.508	4955	9908	5615	7049	7658	12311
519.509	4959	9877	5603	7063	7647	12283
521.515	4947	9862	5585	7046	7649	12303
523.513	4926	9860	5590	7051	7635	12297
525.517	4940	9861	5599	7041	7653	12298
527.527	4933	9843	5581	7023	7644	12330
529.523	4925	9824	5574	7027	7619	12307
531.524	4937	9775	5566	7046	7628	12265
533.528	4925	9758	5563	7011	7622	12282
535.526	4929	9749	5541	7026	7628	12266
537.528	4896	9765	5562	7014	7626	12277
539.537	4916	9712	5571	7020	7616	12286
541.538	4910	9748	5567	7027	7604	12246
543.538	4896	9713	5556	7019	7598	12233
545.541	4893	9690	5557	7001	7598	12250
547.55	4881	9650	5539	7015	7608	12241
549.53	4871	9649	5536	7006	7593	12254
551.531	4896	9642	5525	7019	7605	12239
553.537	4876	9634	5533	7002	7598	12208
555.534	4863	9629	5526	7011	7596	12230
557.542	4858	9578	5509	7004	7590	12235
559.541	4868	9569	5515	6998	7586	12208
561.545	4861	9581	5504	7004	7574	12210
563.536	4857	9579	5508	6990	7588	12211
565.544	4858	9535	5499	6991	7585	12200
567.553	4873	9548	5507	6981	7582	12195
569.547	4840	9501	5504	6984	7579	12191
571.551	4837	9506	5500	6996	7567	12172
573.56	4837	9442	5478	6987	7584	12187
575.556	4820	9470	5478	6993	7550	12159
577.563	4811	9441	5470	6976	7565	12190
579.568	4813	9464	5487	6980	7572	12178
581.572	4808	9442	5485	6966	7558	12170
583.57	4817	9411	5451	6982	7562	12145
585.575	4814	9435	5469	6965	7538	12156
587.582	4794	9401	5469	6953	7549	12129
589.582	4799	9355	5476	6971	7558	12150
591.584	4797	9363	5454	6958	7543	12154
593.589	4794	9354	5452	6950	7550	12122
595.573	4784	9316	5451	6962	7542	12158
597.582	4799	9371	5464	6943	7539	12125
