# Supplementary material for: The intrinsically disordered cytoplasmic tail of a dendrite branching receptor uses two distinct mechanisms to regulate the actin cytoskeleton
Source: eLife journal article supplement (doi:10.7554/elife.88492), 2023-07-17
Supplement: fig6-data2 [file Figure 6D Source Data.xlsx]

## Sheet: Quantification
#1	actin + dmso	actin + rap	10nM SNAP-CapZ + dmso	10nM SNAP-CapZ + rap	50nM SNAP-CapZ + dmso	50nM SNAP-CapZ + rap	250nM SNAP-CapZ + dmso	250nM SNAP-CapZ + rap	250nM F/F-tag + dmso	250nM F/F-tag + rap	500nM F/F-tag + dmso	500nM F/F-tag + rap	1uM F/F-tag + dmso	1uM F/F-tag + rap	250nM F/F-H + dmso	250nM F/F-H + rap	500nM F/F-H + dmso	500nM F/F-H + rap	1uM F/F-H + dmso	1uM F/F-H + rap
raw slope	-149.682	-138.107	-20.878	-16.0393	-25.148	-16.4918	-10.2755	-12.5939	-119.459	-101.759	-100.738	-117.22	-105.029	-96.2627	-90.7377	-32.3105	-77.0266	-12.9181	-80.1165	-8.4716
scaled to actin control	1	0.922673	0.139482	0.107156	0.16801	0.110179	0.0686487	0.0841378	0.798085	0.679835	0.673012	0.783129	0.701683	0.643115	0.606204	0.215861	0.514602	0.0863036	0.535245	0.0565974
#2
raw slope	-127.381	-131.107	-29.898	-19.2037	-20.9099	-13.3371	-10.0884	-5.30691	-91.0573	-65.6822	-95.1131	-88.6092	-79.3498	-89.4995	-90.3418	-19.1431	-79.8376	-10.721	-72.8583	-9.01218
scaled to actin control	1	1.02925	0.234714	0.150759	0.164153	0.104703	0.0791988	0.0416618	0.714845	0.515638	0.746685	0.695626	0.622935	0.702615	0.709227	0.150283	0.626764	0.0841653	0.571973	0.07075
#3
raw slope	-120.751	-114.674	-26.6752	-13.4239	-17.8461	-16.0506	-5.12684	-6.06303	-94.8379	-77.2726	-81.3461	-71.8236	-70.2658	-75.0863	-61.9551	-15.7884	-54.9884	-18.2915	-82.534	-10.2229
scaled to actin control	1	0.949677	0.220911	0.111171	0.147793	0.132923	0.042458	0.0502111	0.785401	0.639934	0.673669	0.594808	0.581908	0.621828	0.513082	0.130752	0.455387	0.151481	0.683506	0.0846613
	actin + dmso	actin + rap	10nM SNAP-CapZ + dmso	10nM SNAP-CapZ + rap	50nM SNAP-CapZ + dmso	50nM SNAP-CapZ + rap	250nM SNAP-CapZ + dmso	250nM SNAP-CapZ + rap	250nM F/F-tag + dmso	250nM F/F-tag + rap	500nM F/F-tag + dmso	500nM F/F-tag + rap	1uM F/F-tag + dmso	1uM F/F-tag + rap	250nM F/F-H + dmso	250nM F/F-H + rap	500nM F/F-H + dmso	500nM F/F-H + rap	1uM F/F-H + dmso	1uM F/F-H + rap
#1	1	0.922673	0.139482	0.107156	0.16801	0.110179	0.0686487	0.0841378	0.798085	0.679835	0.673012	0.783129	0.701683	0.643115	0.606204	0.215861	0.514602	0.0863036	0.535245	0.0565974
#2	1	1.02925	0.234714	0.150759	0.164153	0.104703	0.0791988	0.0416618	0.714845	0.515638	0.746685	0.695626	0.622935	0.702615	0.709227	0.150283	0.626764	0.0841653	0.571973	0.07075
#3	1	0.949677	0.220911	0.111171	0.147793	0.132923	0.042458	0.0502111	0.785401	0.639934	0.673669	0.594808	0.581908	0.621828	0.513082	0.130752	0.455387	0.151481	0.683506	0.0846613
avg	1	0.967202	0.198369	0.123028	0.159985	0.115935	0.0634352	0.0586702	0.76611	0.611802	0.697788	0.691187	0.635509	0.655853	0.609504	0.165632	0.532251	0.107317	0.596908	0.0706695
std dev	0	0.0554098	0.0514623	0.024099	0.0107335	0.0149651	0.0189171	0.022466	0.044848	0.0856373	0.0423467	0.0942387	0.0608698	0.0418728	0.0981144	0.0445824	0.0870411	0.0382624	0.0772117	0.0140321

## Sheet: Statistics
						diff	lwr	upr	p	adj
A	actin + dmso				B-A	-0.0327982	-0.201923	0.136327	1
B	actin + rap				C-A	-0.801631	-0.970756	-0.632506	0
C	10nM SNAP-CapZ + dmso				D-A	-0.876972	-1.0461	-0.707847	0
D	10nM SNAP-CapZ + rap				E-A	-0.840015	-1.00914	-0.67089	0
E	50nM SNAP-CapZ + dmso				F-A	-0.884065	-1.05319	-0.71494	0
F	50nM SNAP-CapZ + rap				G-A	-0.936565	-1.10569	-0.76744	0
G	250nM SNAP-CapZ + dmso				H-A	-0.94133	-1.11045	-0.772205	0
H	250nM SNAP-CapZ + rap				I-A	-0.23389	-0.403014	-0.0647647	0.0008104
I	250nM F/F-tag + dmso				J-A	-0.388198	-0.557323	-0.219073	0
J	250nM F/F-tag + rap				K-A	-0.302212	-0.471336	-0.133087	6.6e-06
K	500nM F/F-tag + dmso				L-A	-0.308813	-0.477937	-0.139688	4.1e-06
L	500nM F/F-tag + rap				M-A	-0.364491	-0.533616	-0.195366	1e-07
M	1uM F/F-tag + dmso				N-A	-0.344147	-0.513272	-0.175022	3e-07
N	1uM F/F-tag + rap				O-A	-0.390496	-0.559621	-0.221371	0
O	250nM F/F-H + dmso				P-A	-0.834368	-1.00349	-0.665243	0
P	250nM F/F-H + rap				Q-A	-0.467749	-0.636874	-0.298624	0
Q	500nM F/F-H + dmso				R-A	-0.892683	-1.06181	-0.723558	0
R	500nM F/F-H + rap				S-A	-0.403092	-0.572217	-0.233967	0
S	1uM F/F-H + dmso				T-A	-0.92933	-1.09846	-0.760206	0
T	1uM F/F-H + rap				C-B	-0.768833	-0.937958	-0.599708	0
					D-B	-0.844173	-1.0133	-0.675049	0
					E-B	-0.807217	-0.976342	-0.638092	0
					F-B	-0.851267	-1.02039	-0.682142	0
					G-B	-0.903767	-1.07289	-0.734642	0
					H-B	-0.908532	-1.07766	-0.739407	0
					I-B	-0.201091	-0.370216	-0.0319665	0.0072212
					J-B	-0.355399	-0.524524	-0.186275	2e-07
					K-B	-0.269413	-0.438538	-0.100288	6.78e-05
					L-B	-0.276014	-0.445139	-0.106889	4.25e-05
					M-B	-0.331693	-0.500818	-0.162568	8e-07
					N-B	-0.311349	-0.480474	-0.142224	3.5e-06
					O-B	-0.357698	-0.526822	-0.188573	1e-07
					P-B	-0.80157	-0.970695	-0.632445	0
					Q-B	-0.434951	-0.604076	-0.265826	0
					R-B	-0.859885	-1.02901	-0.69076	0
					S-B	-0.370293	-0.539418	-0.201169	1e-07
					T-B	-0.896532	-1.06566	-0.727407	0
					D-C	-0.0753407	-0.244466	0.0937842	0.971441
					E-C	-0.0383839	-0.207509	0.130741	0.999995
					F-C	-0.0824342	-0.251559	0.0866907	0.937002
					G-C	-0.134934	-0.304059	0.034191	0.268746
					H-C	-0.139699	-0.308824	0.029426	0.219713
					I-C	0.567741	0.398616	0.736866	0
					J-C	0.413433	0.244308	0.582558	0
					K-C	0.499419	0.330295	0.668544	0
					L-C	0.492818	0.323694	0.661943	0
					M-C	0.43714	0.268015	0.606264	0
					N-C	0.457484	0.288359	0.626609	0
					O-C	0.411135	0.24201	0.58026	0
					P-C	-0.0327372	-0.201862	0.136388	1
					Q-C	0.333882	0.164757	0.503007	7e-07
					R-C	-0.0910524	-0.260177	0.0780725	0.866617
					S-C	0.398539	0.229414	0.567664	0
					T-C	-0.1277	-0.296824	0.0414254	0.355978
					E-D	0.0369568	-0.132168	0.206082	0.999997
					F-D	-0.00709345	-0.176218	0.162031	1
					G-D	-0.0595932	-0.228718	0.109532	0.997716
					H-D	-0.0643582	-0.233483	0.104767	0.994392
					I-D	0.643082	0.473957	0.812207	0
					J-D	0.488774	0.319649	0.657899	0
					K-D	0.57476	0.405635	0.743885	0
					L-D	0.568159	0.399034	0.737284	0
					M-D	0.51248	0.343355	0.681605	0
					N-D	0.532824	0.3637	0.701949	0
					O-D	0.486476	0.317351	0.655601	0
					P-D	0.0426035	-0.126521	0.211728	0.999977
					Q-D	0.409223	0.240098	0.578348	0
					R-D	-0.0157117	-0.184837	0.153413	1
					S-D	0.47388	0.304755	0.643005	0
					T-D	-0.0523588	-0.221484	0.116766	0.999561
					F-E	-0.0440503	-0.213175	0.125075	0.999961
					G-E	-0.09655	-0.265675	0.0725749	0.804976
					H-E	-0.101315	-0.27044	0.0678099	0.742605
					I-E	0.606125	0.437	0.77525	0
					J-E	0.451817	0.282692	0.620942	0
					K-E	0.537803	0.368678	0.706928	0
					L-E	0.531202	0.362077	0.700327	0
					M-E	0.475523	0.306399	0.644648	0
					N-E	0.495868	0.326743	0.664992	0
					O-E	0.449519	0.280394	0.618644	0
					P-E	0.00564671	-0.163478	0.174772	1
					Q-E	0.372266	0.203141	0.541391	0
					R-E	-0.0526686	-0.221793	0.116456	0.999525
					S-E	0.436923	0.267798	0.606048	0
					T-E	-0.0893157	-0.258441	0.0798092	0.883453
					G-F	-0.0524997	-0.221625	0.116625	0.999545
					H-F	-0.0572647	-0.22639	0.11186	0.998601
					I-F	0.650175	0.481051	0.8193	0
					J-F	0.495867	0.326743	0.664992	0
					K-F	0.581854	0.412729	0.750978	0
					L-F	0.575253	0.406128	0.744377	0
					M-F	0.519574	0.350449	0.688699	0
					N-F	0.539918	0.370793	0.709043	0
					O-F	0.493569	0.324444	0.662694	0
					P-F	0.049697	-0.119428	0.218822	0.999784
					Q-F	0.416316	0.247191	0.585441	0
					R-F	-0.00861827	-0.177743	0.160507	1
					S-F	0.480973	0.311849	0.650098	0
					T-F	-0.0452654	-0.21439	0.123859	0.999942
					H-G	-0.00476497	-0.17389	0.16436	1
					I-G	0.702675	0.53355	0.8718	0
					J-G	0.548367	0.379242	0.717492	0
					K-G	0.634353	0.465228	0.803478	0
					L-G	0.627752	0.458627	0.796877	0
					M-G	0.572073	0.402949	0.741198	0
					N-G	0.592418	0.423293	0.761543	0
					O-G	0.546069	0.376944	0.715194	0
					P-G	0.102197	-0.0669282	0.271322	0.730321
					Q-G	0.468816	0.299691	0.637941	0
					R-G	0.0438815	-0.125243	0.213006	0.999964
					S-G	0.533473	0.364348	0.702598	0
					T-G	0.00723436	-0.161891	0.176359	1
					I-H	0.70744	0.538315	0.876565	0
					J-H	0.553132	0.384007	0.722257	0
					K-H	0.639118	0.469993	0.808243	0
					L-H	0.632517	0.463392	0.801642	0
					M-H	0.576838	0.407714	0.745963	0
					N-H	0.597183	0.428058	0.766308	0
					O-H	0.550834	0.381709	0.719959	0
					P-H	0.106962	-0.0621632	0.276087	0.660987
					Q-H	0.473581	0.304456	0.642706	0
					R-H	0.0486464	-0.120478	0.217771	0.999839
					S-H	0.538238	0.369113	0.707363	0
					T-H	0.0119993	-0.157126	0.181124	1
					J-I	-0.154308	-0.323433	0.0148168	0.110316
					K-I	-0.0683219	-0.237447	0.100803	0.989233
					L-I	-0.0749229	-0.244048	0.094202	0.972896
					M-I	-0.130602	-0.299727	0.0385231	0.319202
					N-I	-0.110258	-0.279382	0.0588673	0.611082
					O-I	-0.156606	-0.325731	0.0125187	0.098119
					P-I	-0.600478	-0.769603	-0.431354	0
					Q-I	-0.233859	-0.402984	-0.0647345	0.0008121
					R-I	-0.658794	-0.827919	-0.489669	0
					S-I	-0.169202	-0.338327	-7.71748e-05	0.049784
					T-I	-0.695441	-0.864566	-0.526316	0
					K-J	0.0859862	-0.0831387	0.255111	0.911985
					L-J	0.0793851	-0.0897397	0.24851	0.95419
					M-J	0.0237063	-0.145419	0.192831	1
					N-J	0.0440505	-0.125074	0.213175	0.999961
					O-J	-0.00229809	-0.171423	0.166827	1
					P-J	-0.44617	-0.615295	-0.277046	0
					Q-J	-0.0795513	-0.248676	0.0895736	0.95335
					R-J	-0.504486	-0.673611	-0.335361	0
					S-J	-0.014894	-0.184019	0.154231	1
					T-J	-0.541133	-0.710258	-0.372008	0
					L-K	-0.00660101	-0.175726	0.162524	1
					M-K	-0.0622798	-0.231405	0.106845	0.996148
					N-K	-0.0419357	-0.211061	0.127189	0.999981
					O-K	-0.0882842	-0.257409	0.0808407	0.89282
					P-K	-0.532157	-0.701281	-0.363032	0
					Q-K	-0.165537	-0.334662	0.00358745	0.0610103
					R-K	-0.590472	-0.759597	-0.421347	0
					S-K	-0.10088	-0.270005	0.0682447	0.748586
					T-K	-0.627119	-0.796244	-0.457994	0
					M-L	-0.0556788	-0.224804	0.113446	0.999019
					N-L	-0.0353347	-0.20446	0.13379	0.999999
					O-L	-0.0816832	-0.250808	0.0874417	0.941591
					P-L	-0.525556	-0.69468	-0.356431	0
					Q-L	-0.158936	-0.328061	0.0101885	0.0869358
					R-L	-0.583871	-0.752996	-0.414746	0
					S-L	-0.0942791	-0.263404	0.0748458	0.831913
					T-L	-0.620518	-0.789643	-0.451393	0
					N-M	0.0203442	-0.148781	0.189469	1
					O-M	-0.0260044	-0.195129	0.143121	1
					P-M	-0.469877	-0.639002	-0.300752	0
					Q-M	-0.103258	-0.272383	0.0658673	0.715286
					R-M	-0.528192	-0.697317	-0.359067	0
					S-M	-0.0386003	-0.207725	0.130525	0.999995
					T-M	-0.564839	-0.733964	-0.395714	0
					O-N	-0.0463486	-0.215473	0.122776	0.999919
					P-N	-0.490221	-0.659346	-0.321096	0
					Q-N	-0.123602	-0.292727	0.0455231	0.411558
					R-N	-0.548536	-0.717661	-0.379411	0
					S-N	-0.0589445	-0.228069	0.11018	0.998
					T-N	-0.585183	-0.754308	-0.416058	0
					P-O	-0.443872	-0.612997	-0.274747	0
					Q-O	-0.0772532	-0.246378	0.0918717	0.964023
					R-O	-0.502188	-0.671312	-0.333063	0
					S-O	-0.0125959	-0.181721	0.156529	1
					T-O	-0.538835	-0.70796	-0.36971	0
					Q-P	0.366619	0.197494	0.535744	1e-07
					R-P	-0.0583153	-0.22744	0.11081	0.998247
					S-P	0.431276	0.262152	0.600401	0
					T-P	-0.0949624	-0.264087	0.0741625	0.824017
					R-Q	-0.424934	-0.594059	-0.25581	0
					S-Q	0.0646573	-0.104468	0.233782	0.994092
					T-Q	-0.461582	-0.630706	-0.292457	0
					S-R	0.489592	0.320467	0.658717	0
					T-R	-0.0366471	-0.205772	0.132478	0.999998
					T-S	-0.526239	-0.695364	-0.357114	0
