# Supplementary material for: The intrinsically disordered cytoplasmic tail of a dendrite branching receptor uses two distinct mechanisms to regulate the actin cytoskeleton
Source: eLife journal article supplement (doi:10.7554/elife.88492), 2023-07-17
Supplement: fig6-figsupp1-data2 [file elife-88492-fig6-figsupp1-data2-v1.zip]

## Sheet: Raw Data
NOTE: values under the condition denote RFU values
time (s)	actin 1	actin 2	actin 3	200nM WT 1	200nM WT 2	200nM WT 3	200nM Ala 1	200nM Ala 1 #2	200nM Ala 1 #3	200nM Ala 2	200nM Ala 2 #2	200nM Ala 2 #3	200nM Ala 3	200nM Ala 3 #2	200nM Ala 3 #3	200nM Ala 4	200nM Ala 4 #2	200nM Ala 4 #3	200nM Ala 5	200nM Ala 5 #2	200nM Ala 5 #3	200nM Ala 6	200nM Ala 6 #2	200nM Ala 6 #3	200nM Ala 7	200nM Ala 7 #2	200nM Ala 7 #3	200nM Ala 8	200nM Ala 8 #2	200nM Ala 8 #3	200nM Ala 9	200nM Ala 9 #2	200nM Ala 9 #3	200nM Ala 10	200nM Ala 10 #2	200nM Ala 10 #3
0	11491	11491	11491	11491	11491	11491	11491	11491	11491	11491	11491	11491	11491	11491	11491	11491	11491	11491	11491	11491	11491	11491	11491	11491	11491	11491	11491	11491	11491	11491	11491	11491	11491	11491	11491	11491
1.266	11381	11342	11384	11572	11481	11517	11596	11565	11550	11514	11490	11466	11561	11490	11484	11494	11492	11540	11539	11480	11541	11454	11471	11488	11499	11474	11448	11494	11551	11489	11491	11499	11498	11470	11530	11451
3.271	11203	11111	11192	11541	11490	11457	11639	11569	11581	11556	11456	11372	11622	11429	11456	11463	11440	11615	11529	11394	11435	11361	11374	11362	11461	11416	11342	11513	11573	11488	11436	11474	11484	11485	11526	11430
5.277	11014	10938	10970	11557	11437	11400	11575	11525	11484	11532	11434	11304	11628	11327	11391	11507	11438	11512	11412	11282	11350	11227	11273	11250	11381	11393	11232	11460	11544	11419	11406	11457	11454	11505	11531	11423
7.274	10789	10730	10744	11504	11346	11359	11483	11481	11433	11515	11408	11279	11613	11248	11294	11445	11480	11544	11377	11186	11240	11191	11194	11137	11294	11340	11115	11376	11457	11304	11322	11391	11437	11474	11507	11408
9.272	10632	10563	10556	11510	11285	11306	11416	11426	11359	11482	11350	11253	11516	11167	11186	11455	11398	11472	11253	11050	11104	11031	11093	11010	11202	11202	11005	11302	11369	11163	11220	11274	11344	11488	11494	11438
11.274	10431	10364	10409	11459	11237	11195	11297	11346	11234	11471	11342	11211	11448	11071	11144	11355	11326	11486	11151	10936	11022	10894	10962	10917	11096	11128	10908	11237	11325	11114	11167	11255	11330	11489	11503	11394
13.284	10289	10200	10205	11441	11166	11117	11258	11274	11130	11432	11316	11177	11409	10954	11100	11335	11285	11476	11062	10853	10920	10734	10856	10792	11049	11075	10791	11182	11202	11010	11103	11206	11232	11487	11466	11332
15.282	10132	10021	10058	11393	11091	11059	11213	11205	11003	11376	11297	11180	11354	10889	11027	11328	11334	11413	10972	10730	10823	10607	10767	10631	10937	10995	10626	11067	11119	10905	10958	11155	11170	11435	11457	11347
17.28	9952	9853	9845	11371	11063	10993	11093	11129	10905	11371	11239	11129	11315	10794	10917	11234	11262	11394	10875	10586	10676	10519	10624	10605	10902	10914	10514	10986	11050	10821	10918	11070	11123	11424	11464	11331
19.292	9810	9678	9654	11307	11006	10899	10975	11033	10784	11279	11209	11114	11210	10697	10887	11171	11202	11343	10761	10527	10571	10462	10526	10481	10818	10821	10461	10878	10942	10684	10838	10999	11073	11425	11416	11279
21.281	9653	9517	9517	11256	10962	10819	10917	10912	10718	11275	11179	11064	11143	10597	10792	11152	11168	11328	10675	10369	10476	10316	10454	10392	10716	10701	10311	10851	10904	10632	10735	10977	10993	11383	11428	11301
23.297	9500	9369	9344	11192	10896	10739	10811	10887	10583	11207	11135	11073	11052	10504	10741	11122	11124	11345	10585	10260	10343	10179	10376	10232	10588	10669	10215	10751	10757	10519	10712	10902	10934	11393	11408	11231
25.275	9327	9218	9222	11174	10790	10682	10738	10791	10456	11256	11094	10990	11013	10424	10666	11084	11141	11219	10477	10183	10280	10092	10230	10105	10508	10573	10114	10641	10710	10421	10555	10826	10918	11377	11427	11261
27.279	9210	9050	9044	11127	10769	10624	10686	10715	10382	11201	11034	10957	11000	10299	10570	11043	11096	11143	10405	10029	10165	9996	10135	10004	10414	10509	9976	10576	10631	10317	10550	10763	10841	11352	11428	11222
29.277	9087	8908	8907	11088	10744	10558	10546	10675	10286	11182	10981	10997	10872	10275	10509	11035	11057	11199	10322	9955	10089	9874	10099	9888	10351	10409	9905	10458	10544	10265	10455	10683	10811	11378	11330	11237
31.28	8957	8771	8764	11027	10651	10485	10454	10558	10193	11133	10949	10943	10842	10157	10391	10941	11011	11131	10253	9861	9983	9758	9978	9806	10245	10357	9772	10382	10488	10121	10411	10653	10792	11350	11356	11179
33.275	8797	8651	8632	11012	10613	10408	10409	10477	10121	11105	10939	10887	10743	10085	10359	10935	10984	11064	10125	9806	9906	9631	9859	9704	10198	10227	9679	10317	10384	10050	10334	10570	10697	11297	11301	11168
35.269	8667	8486	8489	10912	10586	10367	10294	10415	10013	11085	10922	10903	10675	9987	10239	10845	10974	11017	10042	9703	9754	9570	9762	9623	10110	10144	9612	10250	10290	9975	10248	10506	10644	11289	11308	11166
37.275	8542	8386	8361	10914	10524	10285	10208	10314	9906	11079	10910	10862	10613	9937	10176	10808	10883	11013	9976	9579	9677	9401	9674	9531	10048	10092	9501	10138	10210	9897	10217	10460	10580	11273	11283	11137
39.27	8433	8267	8264	10893	10468	10243	10175	10261	9845	11008	10883	10797	10553	9798	10117	10857	10869	10974	9889	9470	9594	9354	9596	9452	9977	10056	9413	10064	10136	9776	10108	10404	10527	11251	11249	11113
41.27	8321	8117	8132	10830	10455	10147	10096	10204	9753	10983	10811	10828	10501	9761	10090	10796	10838	10943	9812	9368	9518	9240	9530	9335	9881	9955	9293	9992	10100	9718	10055	10383	10452	11254	11243	11168
43.272	8202	8018	7998	10778	10376	10133	9992	10136	9659	10924	10813	10751	10385	9651	10015	10752	10774	10893	9777	9316	9416	9159	9460	9248	9829	9883	9247	9954	10022	9609	9992	10279	10432	11243	11239	11115
45.277	8075	7935	7875	10770	10359	10077	9931	10056	9578	10912	10803	10744	10331	9590	9953	10669	10776	10821	9667	9246	9317	9079	9381	9130	9735	9812	9181	9823	9972	9555	9952	10233	10390	11215	11218	11075
47.278	8008	7794	7784	10681	10329	10012	9842	9980	9488	10907	10754	10707	10277	9522	9834	10658	10702	10831	9592	9164	9259	8989	9295	9071	9669	9745	9064	9793	9891	9475	9875	10137	10343	11211	11201	11106
49.285	7873	7679	7649	10673	10243	9969	9758	9882	9424	10901	10734	10684	10243	9397	9817	10622	10712	10828	9482	9052	9188	8880	9190	8985	9617	9686	8977	9692	9813	9416	9802	10134	10305	11171	11172	11070
51.284	7788	7593	7553	10648	10217	9916	9743	9826	9336	10814	10677	10646	10181	9371	9728	10561	10684	10784	9401	8993	9114	8817	9135	8925	9484	9636	8898	9628	9778	9316	9752	10044	10189	11181	11155	11092
53.288	7701	7466	7456	10577	10224	9857	9647	9784	9258	10837	10666	10641	10095	9258	9642	10540	10610	10749	9346	8901	9006	8710	9013	8797	9455	9543	8784	9544	9683	9254	9692	10006	10208	11189	11147	11044
55.288	7632	7377	7348	10555	10159	9800	9597	9714	9171	10788	10596	10581	10053	9203	9567	10544	10601	10677	9304	8829	8940	8634	8969	8787	9404	9481	8752	9527	9650	9183	9607	9937	10157	11150	11123	10980
57.293	7531	7302	7251	10524	10138	9762	9496	9631	9122	10784	10583	10578	9901	9106	9505	10486	10617	10659	9184	8731	8867	8557	8918	8665	9344	9398	8675	9417	9547	9104	9607	9878	10169	11131	11160	11000
59.301	7400	7214	7152	10512	10101	9740	9454	9542	9054	10794	10574	10555	9861	9024	9503	10455	10521	10637	9140	8670	8809	8484	8860	8585	9271	9353	8556	9357	9489	9083	9556	9845	10090	11134	11093	10943
61.301	7345	7126	7082	10419	10033	9667	9367	9538	8960	10748	10552	10557	9806	8965	9378	10443	10539	10577	9092	8602	8736	8406	8753	8545	9227	9275	8496	9310	9421	8954	9473	9821	10068	11113	11095	10968
63.301	7248	7055	6970	10379	10005	9614	9323	9505	8925	10698	10479	10506	9750	8911	9365	10351	10474	10518	9008	8531	8636	8327	8675	8456	9180	9256	8455	9229	9396	8922	9440	9745	10001	11113	11056	10918
65.306	7184	6938	6858	10338	9947	9572	9266	9409	8845	10683	10477	10466	9666	8827	9272	10372	10448	10546	8925	8467	8564	8239	8621	8387	9089	9208	8365	9176	9312	8851	9373	9696	9951	11074	11069	10928
67.305	7102	6860	6803	10322	9943	9513	9194	9337	8777	10683	10464	10474	9657	8742	9237	10360	10401	10508	8893	8382	8521	8148	8562	8311	9035	9110	8277	9102	9276	8805	9369	9681	9908	11071	11006	11005
69.312	7025	6786	6688	10285	9847	9514	9130	9292	8707	10682	10439	10409	9530	8664	9169	10296	10377	10479	8814	8293	8423	8093	8487	8214	8995	8996	8215	9046	9190	8710	9297	9608	9856	11048	11035	10935
71.313	6915	6682	6628	10202	9864	9449	9044	9208	8640	10603	10377	10429	9471	8601	9136	10255	10383	10414	8777	8265	8372	8017	8484	8194	8918	8951	8164	8985	9127	8659	9201	9554	9865	11050	10999	10853
73.311	6871	6631	6505	10228	9792	9383	9021	9222	8588	10589	10391	10416	9447	8556	9063	10232	10391	10406	8686	8166	8312	7941	8387	8120	8879	8913	8091	8940	9078	8604	9249	9532	9772	11029	11055	10858
75.318	6791	6554	6443	10199	9778	9360	8939	9104	8547	10553	10313	10322	9386	8453	8999	10198	10320	10420	8616	8090	8227	7915	8322	8035	8808	8888	8015	8879	9016	8542	9194	9507	9755	11017	10984	10847
77.321	6736	6482	6375	10139	9778	9371	8896	9034	8465	10518	10343	10322	9308	8434	8927	10222	10247	10341	8594	8059	8211	7792	8258	7991	8728	8831	7968	8827	8986	8504	9136	9420	9724	11037	10959	10829
79.318	6656	6399	6314	10131	9712	9273	8821	9025	8416	10531	10269	10345	9244	8350	8909	10164	10265	10340	8521	7970	8148	7741	8212	7914	8719	8746	7890	8757	8878	8408	9087	9399	9721	10978	10968	10805
81.323	6619	6335	6248	10068	9661	9226	8762	8955	8377	10509	10245	10296	9213	8297	8822	10139	10211	10274	8458	7920	8088	7691	8100	7871	8665	8720	7846	8704	8836	8380	9057	9353	9643	11008	10928	10773
83.314	6558	6295	6159	10027	9651	9201	8710	8916	8322	10498	10277	10299	9158	8213	8773	10127	10226	10280	8386	7878	8035	7607	8087	7791	8578	8681	7764	8664	8800	8301	9030	9323	9639	10976	10906	10775
85.319	6453	6208	6083	10009	9606	9148	8674	8848	8238	10455	10221	10218	9094	8156	8731	10052	10206	10214	8348	7814	7960	7578	8030	7727	8541	8617	7743	8608	8734	8262	8971	9309	9593	10948	10935	10791
87.318	6432	6142	6033	10018	9596	9113	8592	8787	8194	10378	10204	10265	9033	8118	8663	10022	10148	10178	8307	7757	7909	7523	7958	7685	8549	8575	7658	8553	8684	8193	8940	9209	9520	10924	10859	10763
89.323	6345	6094	5956	9940	9556	9087	8572	8767	8151	10442	10162	10215	8980	8079	8616	10004	10089	10180	8257	7680	7836	7460	7910	7646	8439	8503	7595	8511	8640	8143	8883	9215	9533	10925	10820	10753
91.327	6293	6004	5903	9924	9529	9039	8470	8711	8067	10396	10141	10187	8937	8015	8550	9980	10082	10152	8187	7625	7793	7413	7869	7554	8387	8444	7548	8456	8593	8091	8851	9145	9481	10887	10848	10764
93.33	6252	5982	5815	9873	9498	9010	8406	8622	8017	10366	10108	10192	8871	7941	8495	9948	10062	10134	8135	7570	7744	7332	7807	7544	8360	8366	7509	8443	8581	8011	8834	9120	9457	10856	10857	10733
95.329	6197	5930	5770	9839	9476	8975	8386	8585	7977	10335	10039	10163	8844	7898	8480	9917	10020	10085	8044	7557	7685	7283	7761	7438	8291	8386	7432	8323	8486	8001	8793	9087	9438	10834	10807	10675
97.335	6139	5862	5712	9846	9426	8964	8309	8535	7926	10314	10036	10118	8799	7819	8388	9934	10025	10058	8031	7501	7655	7208	7695	7407	8244	8269	7378	8306	8443	7919	8759	9037	9379	10843	10817	10657
99.345	6082	5788	5637	9792	9401	8904	8305	8508	7910	10297	10067	10080	8745	7766	8375	9848	9973	10034	7938	7433	7599	7172	7643	7350	8211	8236	7321	8248	8396	7907	8718	8997	9366	10846	10875	10653
101.341	6016	5773	5586	9763	9385	8935	8245	8487	7874	10299	10028	10087	8698	7745	8320	9848	9955	9993	7932	7375	7529	7082	7640	7326	8160	8198	7275	8196	8316	7815	8672	8966	9302	10786	10780	10674
103.343	5979	5711	5513	9735	9340	8856	8197	8403	7817	10242	9957	10082	8638	7664	8268	9800	9956	10021	7858	7344	7494	7055	7540	7246	8117	8139	7216	8132	8326	7792	8660	8949	9304	10807	10700	10602
105.343	5937	5646	5485	9695	9336	8832	8150	8325	7788	10230	9963	10023	8616	7621	8187	9792	9889	9929	7850	7278	7427	6987	7514	7226	8075	8148	7206	8112	8264	7709	8613	8888	9282	10788	10727	10629
107.344	5888	5584	5407	9686	9258	8775	8122	8298	7735	10214	9954	10000	8543	7562	8163	9756	9882	9925	7777	7238	7432	6954	7474	7176	8009	8058	7117	8052	8202	7699	8589	8862	9249	10733	10693	10593
109.352	5838	5559	5353	9691	9247	8773	8052	8274	7677	10195	9950	9999	8500	7502	8093	9774	9860	9887	7721	7191	7364	6871	7412	7091	7960	8010	7093	7988	8160	7643	8507	8824	9228	10809	10692	10578
111.352	5817	5514	5300	9658	9240	8698	7983	8200	7648	10178	9885	9974	8433	7444	8062	9738	9829	9887	7678	7138	7320	6832	7397	7060	7983	7950	7016	7993	8117	7606	8505	8802	9197	10775	10657	10570
113.357	5756	5429	5243	9619	9186	8709	7996	8154	7603	10158	9853	9958	8373	7404	8038	9674	9812	9901	7637	7068	7284	6793	7306	7012	7889	7939	6961	7902	8056	7560	8464	8751	9140	10771	10686	10547
115.355	5736	5404	5211	9565	9163	8643	7888	8143	7579	10147	9822	9908	8383	7365	7951	9640	9759	9843	7582	7040	7205	6737	7290	7000	7850	7921	6892	7852	8044	7523	8425	8724	9119	10710	10693	10584
117.347	5683	5359	5153	9544	9133	8629	7903	8120	7495	10103	9789	9912	8275	7286	7924	9661	9773	9797	7540	6973	7195	6707	7251	6934	7795	7871	6870	7804	7995	7438	8389	8688	9120	10689	10634	10522
119.348	5656	5315	5110	9495	9116	8577	7833	8040	7477	10058	9787	9850	8245	7218	7891	9571	9722	9778	7460	6940	7166	6636	7211	6888	7777	7811	6849	7772	7944	7441	8368	8660	9086	10694	10611	10490
121.351	5615	5265	5059	9491	9152	8549	7775	8017	7476	10062	9754	9881	8246	7203	7835	9622	9718	9776	7483	6913	7093	6593	7174	6848	7747	7763	6800	7736	7932	7401	8306	8628	9023	10702	10663	10528
123.356	5580	5217	5000	9488	9080	8529	7759	7976	7419	10046	9762	9834	8170	7127	7764	9576	9685	9706	7407	6866	7069	6548	7104	6818	7698	7709	6736	7702	7856	7345	8285	8607	9005	10714	10551	10504
125.358	5535	5182	4946	9411	9006	8506	7706	7959	7378	10006	9706	9813	8108	7114	7723	9524	9658	9690	7336	6850	7016	6519	7091	6782	7635	7693	6726	7663	7802	7306	8302	8591	8978	10635	10602	10465
127.362	5517	5163	4928	9400	9040	8477	7680	7863	7353	9972	9696	9779	8107	7063	7707	9522	9635	9683	7293	6770	6972	6434	7053	6743	7598	7629	6657	7631	7787	7269	8249	8542	8970	10648	10533	10468
129.365	5487	5104	4867	9399	8970	8462	7636	7850	7313	9982	9644	9818	8067	7021	7685	9480	9629	9679	7220	6732	6937	6434	6997	6690	7575	7608	6633	7599	7721	7224	8200	8524	8989	10628	10568	10457
131.371	5446	5091	4832	9357	8947	8432	7584	7841	7261	9924	9642	9783	8021	6930	7630	9464	9572	9580	7224	6687	6898	6389	7004	6673	7534	7564	6580	7557	7686	7173	8171	8509	8949	10641	10546	10426
133.368	5407	5030	4761	9341	8925	8434	7559	7798	7264	9935	9603	9771	7981	6890	7585	9455	9601	9635	7161	6635	6850	6356	6921	6595	7508	7530	6553	7516	7625	7178	8124	8450	8906	10601	10496	10431
135.371	5397	4997	4740	9276	8906	8371	7527	7788	7222	9898	9589	9702	7929	6910	7553	9437	9562	9574	7127	6615	6815	6296	6890	6577	7471	7458	6482	7458	7613	7121	8147	8437	8887	10614	10516	10416
137.379	5359	4975	4705	9273	8902	8345	7472	7697	7181	9888	9589	9719	7905	6822	7506	9367	9582	9557	7134	6585	6797	6268	6876	6553	7433	7441	6470	7431	7578	7032	8081	8378	8848	10559	10520	10391
139.375	5317	4933	4655	9233	8918	8341	7452	7700	7144	9876	9543	9661	7893	6791	7476	9340	9514	9539	7070	6546	6756	6190	6810	6514	7383	7381	6448	7415	7528	7052	8065	8381	8808	10567	10483	10364
141.384	5270	4884	4641	9245	8843	8303	7405	7665	7121	9864	9545	9630	7837	6743	7420	9340	9482	9525	7026	6508	6726	6172	6776	6487	7363	7396	6422	7375	7506	6978	8015	8394	8830	10560	10494	10356
143.388	5246	4852	4569	9220	8825	8274	7362	7638	7092	9800	9541	9656	7766	6709	7385	9340	9450	9537	6988	6469	6693	6124	6754	6464	7332	7284	6376	7333	7484	6965	8011	8318	8760	10557	10464	10399
145.387	5219	4828	4569	9164	8806	8242	7325	7607	7085	9802	9507	9624	7760	6665	7342	9345	9447	9470	6951	6423	6660	6117	6712	6435	7259	7260	6333	7315	7422	6954	7966	8299	8784	10553	10452	10346
147.391	5187	4798	4523	9147	8745	8262	7288	7561	7081	9805	9457	9587	7700	6617	7303	9290	9387	9454	6877	6369	6653	6063	6702	6390	7243	7262	6286	7239	7370	6891	7954	8275	8740	10509	10416	10352
149.398	5160	4751	4455	9127	8789	8198	7254	7541	7022	9750	9447	9563	7677	6597	7249	9246	9394	9439	6877	6351	6604	6020	6668	6370	7210	7207	6256	7211	7405	6843	7919	8274	8699	10520	10403	10342
151.384	5133	4718	4449	9114	8707	8209	7226	7479	6981	9770	9416	9511	7639	6529	7195	9271	9389	9414	6832	6342	6570	5973	6615	6317	7195	7169	6249	7186	7323	6825	7910	8204	8680	10495	10408	10346
153.391	5102	4704	4408	9077	8698	8174	7203	7474	6962	9702	9383	9555	7603	6504	7207	9225	9344	9393	6790	6278	6520	5935	6621	6279	7138	7148	6203	7147	7289	6789	7891	8181	8664	10494	10388	10292
155.388	5060	4663	4361	9100	8691	8136	7158	7464	6934	9719	9404	9488	7575	6428	7114	9184	9315	9372	6761	6247	6482	5917	6550	6260	7094	7125	6189	7113	7233	6767	7866	8174	8633	10455	10370	10272
157.392	5057	4627	4351	9060	8662	8115	7146	7423	6903	9703	9358	9528	7537	6412	7137	9168	9351	9344	6720	6216	6472	5889	6527	6268	7106	7099	6125	7078	7212	6731	7825	8158	8617	10442	10309	10267
159.393	5009	4601	4304	9051	8627	8097	7099	7349	6899	9701	9325	9489	7523	6371	7083	9156	9315	9305	6709	6187	6413	5856	6508	6196	7026	7072	6108	7072	7210	6665	7801	8140	8606	10431	10337	10259
161.395	5003	4578	4279	9006	8623	8102	7077	7343	6837	9640	9329	9448	7478	6326	7022	9142	9307	9327	6654	6164	6389	5819	6479	6187	7035	7017	6099	7016	7130	6677	7780	8112	8606	10465	10348	10281
163.404	4955	4520	4248	8997	8585	8059	7032	7326	6818	9653	9307	9459	7440	6310	7016	9096	9276	9281	6630	6121	6388	5783	6442	6133	6991	6995	6036	6989	7125	6640	7772	8085	8543	10411	10304	10190
165.402	4952	4514	4215	8972	8613	8031	7012	7270	6793	9664	9262	9415	7407	6267	6927	9110	9259	9235	6581	6074	6344	5771	6408	6092	6998	6957	5973	6939	7130	6588	7690	8069	8566	10413	10290	10202
167.398	4915	4485	4190	8936	8559	8003	6945	7237	6779	9611	9252	9392	7360	6230	6925	9093	9217	9267	6546	6035	6299	5733	6388	6108	6972	6925	5985	6914	7066	6597	7735	8012	8511	10404	10328	10195
169.395	4888	4452	4146	8906	8521	7998	6938	7201	6751	9596	9266	9429	7326	6162	6885	9058	9191	9233	6528	6033	6285	5685	6348	6025	6920	6930	5941	6884	7041	6546	7672	8033	8509	10432	10254	10151
171.387	4848	4438	4136	8891	8528	7965	6891	7209	6733	9585	9198	9379	7330	6167	6847	9043	9196	9216	6507	5993	6235	5667	6349	6033	6874	6856	5922	6859	7008	6512	7654	8029	8506	10395	10247	10193
173.393	4855	4412	4117	8864	8488	7964	6903	7151	6719	9564	9170	9357	7283	6143	6868	9035	9147	9191	6480	5999	6216	5664	6298	6009	6834	6858	5881	6874	6973	6486	7614	7957	8465	10353	10240	10162
175.395	4816	4383	4077	8846	8465	7944	6852	7156	6695	9545	9220	9305	7227	6088	6775	8991	9134	9189	6473	5960	6198	5619	6280	5982	6838	6801	5879	6823	6906	6456	7626	7924	8442	10383	10239	10197
177.385	4783	4353	4035	8809	8435	7931	6835	7109	6652	9535	9155	9305	7199	6066	6773	8981	9152	9140	6420	5921	6155	5567	6242	5973	6832	6793	5875	6796	6915	6429	7598	7953	8427	10303	10290	10134
179.39	4773	4344	4014	8805	8438	7883	6799	7091	6630	9525	9110	9322	7157	6056	6714	8941	9122	9094	6385	5896	6142	5567	6247	5950	6755	6754	5804	6776	6857	6424	7553	7892	8409	10335	10206	10111
181.393	4732	4314	4003	8776	8428	7882	6769	7079	6632	9457	9125	9267	7166	6001	6681	8948	9097	9095	6361	5867	6135	5528	6236	5921	6736	6753	5793	6736	6845	6383	7609	7909	8363	10362	10224	10102
183.397	4714	4278	3956	8767	8397	7848	6745	7066	6594	9443	9044	9296	7140	5979	6677	8952	9061	9100	6332	5824	6085	5479	6208	5894	6741	6745	5773	6685	6817	6371	7536	7872	8348	10299	10172	10079
185.383	4696	4245	3961	8748	8377	7833	6725	7032	6590	9487	9046	9265	7089	5935	6646	8884	9045	9048	6308	5792	6077	5467	6177	5889	6721	6724	5748	6668	6769	6328	7530	7850	8391	10323	10169	10113
187.383	4667	4233	3911	8721	8349	7848	6685	7016	6573	9399	9025	9275	7087	5904	6594	8879	9080	9063	6311	5759	6049	5454	6120	5854	6653	6660	5735	6662	6768	6311	7499	7818	8346	10243	10170	10073
189.388	4639	4215	3908	8719	8344	7814	6689	6992	6547	9391	9015	9198	7031	5890	6569	8831	9035	9028	6250	5754	6018	5444	6125	5823	6646	6660	5712	6651	6734	6273	7472	7812	8289	10272	10162	10061
191.39	4631	4196	3871	8651	8291	7801	6687	6956	6498	9363	9002	9193	7010	5867	6534	8844	8977	9027	6222	5735	5989	5410	6107	5807	6635	6618	5690	6599	6671	6266	7475	7768	8289	10252	10108	10046
193.392	4600	4173	3862	8654	8320	7780	6642	6952	6487	9403	8966	9163	6961	5812	6508	8827	8982	8975	6197	5725	5977	5386	6083	5791	6612	6572	5676	6563	6678	6234	7413	7785	8294	10231	10111	10074
195.402	4590	4149	3816	8681	8282	7766	6637	6891	6482	9370	8934	9136	6965	5789	6489	8795	9019	8990	6190	5707	5963	5358	6040	5747	6548	6538	5639	6575	6655	6194	7418	7771	8264	10162	10131	10066
197.4	4559	4120	3782	8643	8268	7742	6586	6891	6445	9320	8889	9135	6908	5754	6467	8767	8974	8976	6159	5674	5930	5294	6012	5735	6546	6538	5608	6523	6640	6166	7375	7737	8231	10243	10114	10038
199.408	4537	4120	3768	8605	8226	7724	6539	6855	6429	9352	8900	9120	6889	5722	6422	8779	8937	8912	6129	5651	5886	5311	6033	5728	6552	6503	5572	6525	6594	6153	7384	7732	8241	10230	10113	9998
201.411	4517	4079	3765	8583	8225	7706	6526	6826	6413	9277	8888	9104	6867	5688	6387	8758	8927	8944	6123	5628	5889	5306	6008	5717	6525	6479	5562	6459	6581	6137	7359	7734	8188	10187	10083	10011
203.404	4502	4076	3737	8579	8207	7703	6520	6806	6407	9269	8884	9097	6870	5692	6364	8701	8928	8901	6094	5613	5847	5248	5962	5702	6483	6448	5552	6469	6513	6132	7337	7688	8199	10161	10085	9964
205.411	4488	4044	3725	8551	8200	7688	6499	6758	6391	9287	8847	9063	6826	5651	6314	8722	8885	8853	6059	5568	5835	5245	5930	5653	6454	6428	5533	6421	6510	6098	7331	7650	8174	10216	10106	9972
207.415	4469	4057	3683	8559	8206	7662	6474	6729	6364	9269	8868	9048	6821	5634	6284	8705	8940	8881	6031	5548	5811	5195	5926	5647	6420	6415	5495	6408	6481	6090	7313	7670	8163	10141	10072	9948
209.423	4449	4016	3659	8532	8153	7693	6449	6734	6363	9227	8816	9045	6762	5583	6300	8719	8884	8843	6024	5517	5774	5238	5911	5630	6407	6381	5466	6389	6472	6049	7293	7636	8142	10176	10029	9933
211.423	4426	4040	3633	8526	8130	7664	6443	6700	6340	9235	8803	9019	6760	5556	6273	8632	8861	8829	5997	5510	5772	5197	5911	5607	6431	6372	5439	6366	6429	6016	7265	7643	8119	10128	10011	9950
213.421	4409	4000	3626	8462	8118	7620	6404	6702	6317	9198	8759	9003	6719	5525	6247	8683	8855	8848	5983	5492	5751	5173	5889	5592	6395	6338	5450	6333	6427	5989	7252	7586	8110	10114	10034	9942
215.429	4399	3979	3594	8484	8086	7608	6403	6668	6300	9186	8760	8996	6714	5516	6190	8664	8823	8801	5954	5466	5720	5162	5865	5604	6358	6328	5426	6328	6400	5976	7211	7569	8089	10106	9979	9929
217.433	4365	3982	3587	8463	8082	7599	6390	6643	6303	9184	8757	8986	6690	5476	6164	8642	8841	8798	5940	5416	5713	5152	5862	5544	6346	6290	5434	6302	6378	5970	7228	7558	8091	10162	10003	9921
219.433	4353	3968	3569	8456	8079	7577	6360	6612	6267	9175	8739	8991	6683	5441	6190	8626	8785	8735	5897	5437	5699	5132	5832	5563	6299	6291	5393	6280	6342	5949	7216	7559	8064	10086	9955	9892
221.44	4332	3921	3548	8441	8083	7574	6343	6663	6252	9125	8712	8924	6673	5449	6134	8601	8776	8738	5906	5405	5677	5111	5825	5531	6294	6243	5397	6249	6315	5919	7202	7512	8017	10123	9936	9885
223.439	4298	3922	3535	8436	8018	7532	6313	6582	6239	9079	8736	8931	6630	5391	6087	8567	8759	8732	5881	5369	5625	5090	5795	5502	6291	6246	5337	6234	6311	5917	7154	7484	8038	10055	9957	9886
225.442	4270	3897	3511	8417	8030	7503	6310	6576	6238	9096	8707	8933	6615	5419	6071	8531	8762	8703	5846	5381	5618	5065	5775	5489	6258	6187	5349	6219	6303	5870	7154	7501	8036	10101	9936	9855
227.449	4277	3871	3494	8402	8009	7521	6271	6579	6203	9060	8647	8916	6591	5354	6059	8545	8732	8682	5829	5376	5612	5057	5770	5477	6256	6190	5318	6219	6233	5874	7164	7463	8014	10072	9892	9836
229.45	4247	3886	3470	8429	7999	7502	6256	6532	6187	9069	8628	8852	6583	5309	6036	8552	8736	8690	5809	5324	5604	5035	5751	5475	6198	6198	5304	6179	6226	5832	7119	7463	7985	10078	9932	9842
231.452	4246	3855	3472	8357	8005	7499	6227	6490	6159	9067	8614	8861	6542	5330	6004	8526	8697	8631	5775	5312	5569	5008	5723	5452	6194	6163	5273	6145	6233	5787	7094	7452	7974	10073	9927	9811
233.46	4232	3847	3439	8352	7977	7456	6237	6510	6159	9071	8603	8847	6531	5287	5987	8492	8691	8626	5778	5312	5561	5000	5717	5406	6186	6130	5261	6146	6165	5802	7089	7466	7942	10039	9904	9843
235.458	4224	3795	3431	8353	7942	7469	6216	6452	6135	9050	8611	8870	6501	5263	5932	8485	8699	8598	5760	5295	5522	4992	5702	5405	6156	6126	5245	6112	6144	5773	7081	7434	7937	10035	9906	9803
237.453	4184	3781	3414	8356	7946	7437	6164	6451	6145	9019	8580	8829	6488	5225	5947	8469	8670	8611	5739	5262	5536	4974	5691	5394	6139	6083	5217	6085	6134	5784	7041	7426	7938	9974	9868	9817
239.464	4178	3762	3422	8367	7929	7452	6149	6434	6106	9004	8541	8817	6445	5224	5926	8474	8627	8576	5703	5234	5500	4932	5658	5377	6126	6070	5209	6093	6122	5735	7066	7416	7927	10012	9856	9798
241.463	4173	3742	3372	8343	7912	7423	6125	6438	6096	8996	8566	8808	6458	5201	5918	8456	8638	8620	5684	5209	5487	4944	5646	5362	6120	6034	5194	6065	6106	5715	7011	7373	7872	9966	9850	9813
243.475	4159	3734	3368	8299	7883	7410	6138	6420	6065	8963	8500	8790	6422	5166	5868	8436	8643	8559	5655	5194	5489	4943	5643	5351	6106	6032	5185	6040	6095	5704	6998	7369	7884	10001	9812	9778
245.465	4142	3700	3351	8278	7858	7389	6106	6376	6085	8969	8493	8773	6410	5152	5854	8397	8641	8556	5677	5162	5455	4904	5628	5321	6137	6022	5150	6024	6068	5691	6966	7370	7878	9948	9811	9735
247.483	4116	3676	3344	8272	7847	7410	6082	6359	6041	8936	8418	8761	6398	5129	5871	8413	8596	8536	5668	5172	5427	4914	5608	5331	6051	5976	5130	6000	6032	5670	6955	7355	7874	9965	9812	9736
249.471	4102	3680	3315	8247	7828	7395	6086	6331	6039	8926	8432	8780	6352	5118	5833	8399	8608	8504	5615	5122	5408	4899	5615	5285	6044	5978	5142	5976	6013	5661	6959	7322	7848	9962	9790	9733
251.465	4094	3659	3301	8242	7833	7322	6036	6325	6017	8910	8413	8757	6348	5107	5806	8394	8582	8511	5621	5116	5409	4872	5571	5273	6033	5958	5123	5953	6004	5633	6952	7314	7818	9944	9747	9686
253.475	4094	3643	3306	8206	7851	7361	6045	6322	5992	8924	8455	8741	6312	5072	5778	8373	8572	8470	5573	5105	5396	4855	5545	5267	5977	5943	5114	5942	5977	5617	6945	7293	7835	9943	9773	9701
255.473	4065	3613	3280	8230	7828	7317	6025	6290	5984	8881	8398	8698	6281	5057	5733	8344	8546	8472	5563	5081	5352	4837	5538	5265	5998	5902	5076	5929	5984	5600	6925	7281	7831	9883	9781	9709
257.475	4069	3612	3267	8232	7833	7312	6008	6266	5955	8863	8368	8695	6294	5047	5773	8323	8536	8418	5564	5047	5331	4838	5537	5236	5965	5927	5064	5922	5934	5577	6870	7267	7794	9909	9771	9725
259.484	4043	3586	3244	8193	7811	7306	5994	6265	5969	8850	8368	8695	6294	5028	5742	8310	8540	8438	5543	5054	5351	4819	5509	5218	5995	5894	5052	5893	5903	5574	6859	7251	7792	9895	9755	9700
261.48	4044	3554	3227	8184	7788	7294	5971	6255	5930	8854	8358	8700	6263	4984	5706	8328	8497	8410	5535	5022	5321	4804	5511	5217	5950	5887	5040	5855	5887	5543	6869	7260	7779	9867	9766	9723
263.488	4033	3578	3224	8168	7776	7282	5957	6252	5929	8820	8344	8652	6258	4969	5668	8340	8501	8386	5505	4989	5301	4765	5477	5198	5914	5858	5001	5848	5897	5551	6843	7220	7770	9871	9743	9648
265.494	4022	3526	3212	8176	7781	7277	5919	6232	5943	8832	8360	8663	6241	4978	5667	8310	8522	8384	5486	5002	5285	4768	5482	5191	5933	5848	5007	5835	5868	5522	6843	7282	7736	9895	9702	9675
267.494	4021	3533	3193	8122	7762	7280	5911	6214	5929	8781	8317	8604	6216	4922	5640	8269	8470	8366	5469	4986	5291	4735	5466	5161	5934	5799	4978	5845	5839	5497	6810	7253	7763	9825	9741	9674
269.496	3998	3531	3172	8100	7755	7256	5922	6200	5922	8824	8262	8641	6215	4938	5604	8280	8472	8358	5457	4944	5264	4731	5452	5151	5885	5779	4952	5806	5833	5484	6792	7204	7759	9853	9705	9613
271.499	3993	3502	3155	8095	7722	7221	5887	6155	5879	8793	8296	8607	6194	4923	5616	8275	8456	8404	5439	4967	5213	4734	5430	5146	5890	5754	4956	5764	5800	5441	6785	7186	7738	9821	9692	9656
273.506	3970	3509	3159	8108	7745	7227	5866	6142	5868	8811	8254	8621	6160	4904	5573	8238	8444	8348	5410	4916	5242	4712	5434	5117	5877	5766	4926	5794	5813	5440	6806	7150	7702	9882	9726	9627
275.495	3974	3473	3109	8105	7725	7216	5860	6130	5880	8753	8231	8547	6193	4867	5551	8217	8441	8320	5415	4907	5213	4706	5421	5108	5863	5759	4907	5749	5770	5423	6805	7193	7704	9830	9688	9613
277.505	3927	3475	3131	8069	7684	7198	5824	6121	5877	8721	8247	8585	6138	4859	5548	8229	8404	8328	5379	4903	5191	4667	5389	5112	5853	5724	4913	5736	5741	5413	6756	7125	7645	9788	9665	9609
279.513	3919	3466	3101	8048	7698	7194	5807	6100	5854	8717	8178	8558	6144	4858	5522	8230	8374	8318	5360	4873	5197	4666	5394	5074	5829	5728	4897	5751	5742	5389	6738	7171	7679	9778	9649	9594
281.513	3910	3450	3083	8043	7693	7206	5810	6069	5814	8690	8217	8538	6123	4826	5492	8176	8384	8311	5362	4857	5161	4630	5365	5052	5799	5689	4866	5705	5716	5416	6735	7113	7639	9806	9621	9550
283.508	3883	3434	3057	8012	7646	7194	5802	6059	5822	8691	8157	8524	6082	4793	5467	8207	8359	8254	5369	4867	5152	4636	5361	5054	5786	5675	4859	5691	5712	5383	6706	7059	7662	9803	9644	9550
285.524	3870	3395	3081	8008	7656	7121	5766	6066	5821	8664	8168	8515	6073	4790	5474	8189	8339	8260	5337	4826	5123	4642	5341	5059	5793	5655	4854	5655	5702	5356	6723	7083	7620	9756	9630	9570
287.517	3870	3409	3052	7995	7621	7133	5743	6050	5788	8677	8130	8530	6051	4769	5468	8171	8337	8234	5334	4816	5109	4633	5337	5041	5753	5658	4828	5669	5671	5328	6693	7056	7586	9746	9562	9599
289.523	3860	3397	3032	7982	7634	7128	5745	6032	5796	8667	8137	8501	6046	4773	5432	8141	8345	8259	5298	4806	5108	4620	5340	5028	5755	5647	4804	5632	5651	5311	6683	7020	7612	9813	9612	9575
291.53	3839	3373	3017	7977	7625	7107	5738	6024	5784	8648	8128	8471	6016	4754	5413	8133	8323	8215	5296	4779	5080	4603	5315	5047	5761	5641	4836	5625	5665	5300	6638	7056	7575	9716	9632	9560
293.517	3826	3361	3010	7954	7595	7122	5706	5993	5783	8651	8070	8480	6003	4724	5392	8127	8298	8212	5268	4794	5092	4576	5310	5006	5713	5601	4793	5598	5624	5283	6664	7011	7594	9711	9565	9557
295.516	3812	3353	2983	7972	7622	7090	5692	5967	5739	8636	8082	8466	5977	4716	5349	8098	8296	8160	5260	4747	5074	4556	5288	4997	5729	5597	4760	5587	5617	5270	6649	6979	7563	9707	9567	9513
297.518	3808	3354	2970	7957	7558	7107	5689	5971	5743	8584	8052	8458	5960	4702	5353	8093	8286	8165	5250	4767	5028	4558	5275	4977	5667	5551	4779	5558	5624	5274	6620	7026	7559	9722	9542	9532

## Sheet: Slopes
		actin	200 WT	Ala #1	Ala #2	Ala #3	Ala #4	Ala #5	Ala #6	Ala #7	Ala #8	Ala #9	ala #10
		-81.0102	-17.4951	-42.0339	-14.7197	-33.1291	-21.8451	-46.4717	-55.9722	-42.2214	-39.4712	-36.1461	-8.50186
	slopes	-86.9565	-28.2518	-37.8461	-17.3274	-42.6471	-19.0961	-52.2978	-50.3781	-39.7525	-41.6901	-29.0231	-7.75048
		-87.1803	-34.6465	-49.0031	-14.6572	-35.1662	-17.8147	-51.0794	-54.3471	-54.9552	-47.2842	-25.0242	-9.97442
		actin	WT	Ala #1	Ala #2	Ala #3	Ala #4	Ala #5	Ala #6	Ala #7	Ala #8	Ala #9	ala #10
		0.929226	0.200677	0.482149	0.168842	0.380007	0.250574	0.533052	0.642029	0.4843	0.452754	0.414613	0.0975204
relative to actin #3		0.997433	0.324061	0.434113	0.198753	0.489182	0.219042	0.599881	0.577862	0.45598	0.478206	0.332909	0.0889018
		1	0.397412	0.562089	0.168125	0.403374	0.204343	0.585905	0.623388	0.630363	0.542373	0.28704	0.114411
	avg	0.975553	0.307383	0.492784	0.178573	0.424188	0.224653	0.572946	0.614426	0.523548	0.491111	0.344854	0.100278
	std dev	0.0401408	0.0994223	0.0646472	0.0174801	0.0574867	0.0236205	0.0352487	0.0330089	0.0935823	0.0461821	0.06462	0.0129765

## Sheet: Statistics
actin	A	0.929226
actin	A	0.997433								*=p<.05
actin	A	1								**=p<.01
WT	B	0.200677								***=p<.001
WT	B	0.324061				diff	lwr	upr	p
WT	B	0.397412			B-A	-0.66817	-0.832546	-0.503793	0	***
Ala #1	C	0.482149			C-A	-0.48277	-0.647146	-0.318393	0	***
Ala #1	C	0.434113			D-A	-0.79698	-0.961356	-0.632603	0	***
Ala #1	C	0.562089			E-A	-0.551365	-0.715742	-0.386989	0	***
Ala #2	D	0.168842			F-A	-0.7509	-0.915276	-0.586524	0	***
Ala #2	D	0.198753			G-A	-0.402607	-0.566984	-0.238231	3e-07	***
Ala #2	D	0.168125			H-A	-0.361127	-0.525504	-0.196751	2.1e-06	***
Ala #3	E	0.380007			I-A	-0.452006	-0.616382	-0.287629	0	***
Ala #3	E	0.489182			J-A	-0.484442	-0.648819	-0.320066	0	***
Ala #3	E	0.403374			K-A	-0.630699	-0.795076	-0.466323	0	***
Ala #4	F	0.250574			L-A	-0.875275	-1.03965	-0.710899	0	***
Ala #4	F	0.219042			C-B	0.1854	0.0210236	0.349777	0.0178791	*
Ala #4	F	0.204343			D-B	-0.12881	-0.293187	0.0355662	0.230423
Ala #5	G	0.533052			E-B	0.116804	-0.0475722	0.281181	0.351566
Ala #5	G	0.599881			F-B	-0.0827303	-0.247107	0.0816461	0.795309
Ala #5	G	0.585905			G-B	0.265563	0.101186	0.429939	0.0002686	***
Ala #6	H	0.642029			H-B	0.307043	0.142666	0.471419	3.11e-05	***
Ala #6	H	0.577862			I-B	0.216164	0.0517877	0.380541	0.0036539	**
Ala #6	H	0.623388			J-B	0.183727	0.0193507	0.348104	0.0194464	*
Ala #7	I	0.4843			K-B	0.0374704	-0.126906	0.201847	0.999318
Ala #7	I	0.45598			L-B	-0.207106	-0.371482	-0.0427291	0.0058698	**
Ala #7	I	0.630363			D-C	-0.31421	-0.478587	-0.149834	2.16e-05
Ala #8	J	0.452754			E-C	-0.0685958	-0.232972	0.0957806	0.925103
Ala #8	J	0.478206			F-C	-0.26813	-0.432507	-0.103754	0.0002346
Ala #8	J	0.542373			G-C	0.0801625	-0.0842139	0.244539	0.823987
Ala #9	K	0.414613			H-C	0.121642	-0.0427339	0.286019	0.298654
Ala #9	K	0.332909			I-C	0.0307641	-0.133612	0.19514	0.999894
Ala #9	K	0.28704			J-C	-0.00167288	-0.166049	0.162704	1
ala #10	L	0.0975204			K-C	-0.14793	-0.312306	0.0164467	0.105712
ala #10	L	0.0889018			L-C	-0.392506	-0.556882	-0.228129	5e-07
ala #10	L	0.114411			E-D	0.245614	0.081238	0.409991	0.0007706
					F-D	0.0460799	-0.118297	0.210456	0.995839
					G-D	0.394373	0.229996	0.558749	4e-07
					H-D	0.435853	0.271476	0.600229	1e-07
					I-D	0.344974	0.180598	0.509351	4.6e-06
					J-D	0.312537	0.148161	0.476914	2.35e-05
					K-D	0.166281	0.00190416	0.330657	0.045683
					L-D	-0.0782953	-0.242672	0.0860811	0.84354
					F-E	-0.199535	-0.363911	-0.0351581	0.0086932
					G-E	0.148758	-0.0156181	0.313135	0.101953
					H-E	0.190238	0.0258619	0.354615	0.0139978
					I-E	0.0993599	-0.0650166	0.263736	0.577385
					J-E	0.0669229	-0.0974535	0.231299	0.935618
					K-E	-0.0793339	-0.24371	0.0850426	0.832806
					L-E	-0.32391	-0.488286	-0.159533	1.32e-05
					G-F	0.348293	0.183916	0.512669	3.9e-06
					H-F	0.389773	0.225396	0.554149	5e-07
					I-F	0.298894	0.134518	0.463271	4.73e-05
					J-F	0.266458	0.102081	0.430834	0.0002562
					K-F	0.120201	-0.0441757	0.284577	0.313859
					L-F	-0.124375	-0.288752	0.0400012	0.271184
					H-G	0.04148	-0.122896	0.205856	0.998307
					I-G	-0.0493984	-0.213775	0.114978	0.99266
					J-G	-0.0818354	-0.246212	0.0825411	0.805528
					K-G	-0.228092	-0.392469	-0.0637158	0.0019485
					L-G	-0.472668	-0.637045	-0.308292	0
					I-H	-0.0908784	-0.255255	0.073498	0.693314
					J-H	-0.123315	-0.287692	0.0410611	0.281626
					K-H	-0.269572	-0.433949	-0.105196	0.0002175
					L-H	-0.514148	-0.678525	-0.349772	0
					J-I	-0.0324369	-0.196813	0.131939	0.999823
					K-I	-0.178694	-0.34307	-0.0143173	0.0249899
					L-I	-0.42327	-0.587646	-0.258893	1e-07
					K-J	-0.146257	-0.310633	0.0181196	0.113666
					L-J	-0.390833	-0.555209	-0.226456	5e-07
					L-K	-0.244576	-0.408952	-0.0801995	0.0008142
