# Supplementary material for: The intrinsically disordered cytoplasmic tail of a dendrite branching receptor uses two distinct mechanisms to regulate the actin cytoskeleton
Source: eLife journal article supplement (doi:10.7554/elife.88492), 2023-07-17
Supplement: fig6-figsupp1-data2 [file Figure 6 - figure supplement 1C source data.xlsx]

## Sheet: Quantification
a
actin conc	HPO30 intensity	fractional occupancy		actin conc	HPO30 intensity	fractional occupancy		actin conc	HPO30 intensity	fractional occupancy
0	19155.1	0		0	22846.7	0		0	19142.3	0
0.25	16631.6	-0.204207		0.25	18642.9	-0.0619239		0.25	18475.8	-0.158634
0.5	13811.3	0		0.5	17555.7	0		0.5	15946.2	0
1	10247.2	0.258057		1	15018.7	0.144515		1	10954	0.313065
2	8390.48	0.392491		2	10361.9	0.409769		2	8248.12	0.482754
3.5	5995.49	0.565899		3.5	8472.94	0.517369		3.5	4628.9	0.709718
5	4743.2	0.656571		5	6484.56	0.63063		5	4177.42	0.738031
7.5	3469.93	0.748761		7.5	6228.39	0.645222		7.5	4314.66	0.729424
10	3881.35	0.718973		10	6409.68	0.634896		10	4543.9	0.715048
15	4517.9	0.672883		15	6411.51	0.634791		15	2931.98	0.816133

## Sheet: Fit Parameters
NOTE: "m" denotes model and "d" denotes data
xm	ym1		xd1	yd1
0	0		0	0				Dynafit fitting paramters
0.05	0.0258715		0.25	0.131738
0.0529853	0.0273781		0.5	0.278977				FIT	STDERR	CV%
0.0561488	0.0289701		1	0.465042				1.68781	0.1309	7.75563
0.0595012	0.0306521		2	0.561972
0.0630537	0.0324288		3.5	0.687003
0.0668183	0.0343052		5	0.75238
0.0708078	0.0362864		7.5	0.818851
0.0750354	0.038378		10	0.797373
0.0795154	0.0405855		15	0.764141
0.0842629	0.0429149		0	0
0.0892938	0.0453723		0.25	0.184002
0.0946251	0.0479639		0.5	0.231586
0.100275	0.0506965		1	0.342633
0.106262	0.0535768		2	0.546458
0.112606	0.0566119		3.5	0.629139
0.119329	0.059809		5	0.716171
0.126454	0.0631756		7.5	0.727384
0.134004	0.0667195		10	0.719448
0.142005	0.0704485		15	0.719368
0.150483	0.0743708		0	0
0.159468	0.0784946		0.25	0.0348189
0.168989	0.0828283		0.5	0.166966
0.179078	0.0873805		1	0.427759
0.18977	0.0921598		2	0.569116
0.201101	0.0971748		3.5	0.758185
0.213107	0.102434		5	0.781771
0.225831	0.107947		7.5	0.774601
0.239314	0.113722		10	0.762625
0.253603	0.119768		15	0.846832
0.268744	0.126092
0.28479	0.132704
0.301793	0.139611
0.319812	0.14682
0.338906	0.15434
0.359141	0.162176
0.380583	0.170335
0.403306	0.178822
0.427386	0.187642
0.452903	0.196799
0.479944	0.206295
0.508599	0.216133
0.538965	0.226312
0.571144	0.236834
0.605245	0.247695
0.641381	0.258892
0.679675	0.270421
0.720255	0.282275
0.763258	0.294447
0.808829	0.306927
0.85712	0.319703
0.908295	0.332764
0.962525	0.346094
1.01999	0.359676
1.08089	0.373494
1.14543	0.387528
1.21382	0.401757
1.28629	0.416158
1.36309	0.430709
1.44447	0.445384
1.53071	0.460159
1.6221	0.475006
1.71895	0.4899
1.82158	0.504813
1.93034	0.519719
2.04559	0.534588
2.16772	0.549396
2.29715	0.564115
2.4343	0.578719
2.57964	0.593183
2.73366	0.607484
2.89688	0.621599
3.06983	0.635505
3.25312	0.649184
3.44735	0.662616
3.65317	0.675785
3.87129	0.688675
4.10242	0.701272
4.34736	0.713565
4.60692	0.725543
4.88198	0.737198
5.17346	0.748523
5.48234	0.759512
5.80967	0.770161
6.15654	0.780469
6.52412	0.790434
6.91364	0.800057
7.32642	0.809338
7.76385	0.818281
8.22739	0.826888
8.71861	0.835165
9.23916	0.843117
9.79079	0.850748
10.3754	0.858067
10.9948	0.865079
11.6513	0.871793
12.3469	0.878216
13.0841	0.884357
13.8653	0.890224
14.6931	0.895826
15.5704	0.90117
16.5	0.906267
16.5	0.906267
