# Supplementary material for: The intrinsically disordered cytoplasmic tail of a dendrite branching receptor uses two distinct mechanisms to regulate the actin cytoskeleton
Source: eLife journal article supplement (doi:10.7554/elife.88492), 2023-07-17
Supplement: fig6-figsupp1-data2 [file Figure 6 - figure supplement 1E source data.xlsx]

## Sheet: Quantification
Method: Take ((intensity pelleted with actin/(total intensity with actin)) - (intensity pelleted without actin/(total intensity without actin)))/(intensity actin)
			without actin							with actin				"Corrected" %P
	Sup Int	Pel Inten	Total Int	% Sup	% Pel			Sup Int	Pel Inten	Total Int	% Sup	% Pel		c%P
BSA 1	36410.8	531.678	36942.5	98.5608	1.4392		BSA 1	38514.8	976.506	39491.4	97.5273	2.47271		1.0335
BSA 2	34759.9	392.435	35152.3	98.8836	1.11638		BSA 2	36224.5	566.506	36791	98.4602	1.5398		0.423411
BSA 1	48340.7	1544.23	49885	96.9044	3.09559		BSA 1	52063.3	1918.38	53981.7	96.4462	3.55375		0.458163
			without actin							with actin
	Sup Int	Pel Inten	Total Int	% Sup	% Pel			Sup Int	Pel Inten	Total Int	% Sup	% Pel
WT 1	38526.4	105.369	38631.8	99.7272	0.272752		WT 1	28024.8	19686.1	47710.9	58.7388	41.2612		40.9884
WT 2	30917.8	287.364	31205.1	99.0791	0.920887		WT 2	25052.8	17093.4	42146.2	59.4426	40.5574		39.6366
WT 1	33029	750.607	33779.6	97.7779	2.22207		WT 1	20112.7	17458.6	37571.3	53.5322	46.4678		44.2457
			without actin							with actin
	Sup Int	Pel Inten	Total Int	% Sup	% Pel			Sup Int	Pel Inten	Total Int	% Sup	% Pel
#1 1	31206.2	144.536	31350.8	99.539	0.461028		#1 1	32085.4	12679.4	44764.8	71.6756	28.3244		27.8634
#1 2	31345.1	507.192	31852.3	98.4077	1.59232		#1 2	27649	6566.32	34215.3	80.8088	19.1912		17.5988
#1 1	32210.9	850.435	33061.3	97.4277	2.57229		#1 1	23499.4	12926.4	36425.8	64.5131	35.4869		32.9146
			without actin							with actin
	Sup Int	Pel Inten	Total Int	% Sup	% Pel			Sup Int	Pel Inten	Total Int	% Sup	% Pel
#2 1	35913.4	110.536	36023.9	99.6932	0.306841		#2 1	28608.7	19816.7	48425.4	59.0779	40.9221		40.6153
#2 2	29189	2186.96	31376	93.0298	6.97018		#2 2	20836.8	16720.3	37557.2	55.4803	44.5197		37.5495
#2 1	32680.9	400.192	33081.1	98.7903	1.20973		#2 1	23873.7	20694.3	44568	53.5668	46.4332		45.2234
			without actin							with actin
	Sup Int	Pel Inten	Total Int	% Sup	% Pel			Sup Int	Pel Inten	Total Int	% Sup	% Pel
#3 1	32305	416.607	32721.6	98.7268	1.27319		#3 1	28576.3	14600.6	43176.9	66.1843	33.8157		32.5425
#3 2	46412.5	321.021	46733.5	99.3131	0.686918		#3 2	40163	22088.9	62251.9	64.5169	35.4831		34.7962
#3 1	34243.4	255.778	34499.2	99.2586	0.741403		#3 1	25788	15018.4	40806.4	63.1961	36.8039		36.0625
			without actin							with actin
	Sup Int	Pel Inten	Total Int	% Sup	% Pel			Sup Int	Pel Inten	Total Int	% Sup	% Pel
#4 1	40629.8	51.536	40681.3	99.8733	0.126682		#4 1	32394.2	18355.1	50749.2	63.8319	36.1681		36.0415
#4 2	73114.3	378.486	73492.8	99.485	0.514997		#4 2	53859.8	26753.5	80613.3	66.8125	33.1875		32.6725
#4 1	36363	392.192	36755.2	98.933	1.06704		#4 1	25462.2	15308.1	40770.3	62.4528	37.5472		36.4801
			without actin							with actin
	Sup Int	Pel Inten	Total Int	% Sup	% Pel			Sup Int	Pel Inten	Total Int	% Sup	% Pel
#5 1	34263.9	365.828	34629.7	98.9436	1.0564		#5 1	29587.3	8209.7	37797	78.2795	21.7205		20.6641
#5 2	56930.9	212.95	57143.9	99.6273	0.372656		#5 2	48095.9	10858.5	58954.3	81.5815	18.4185		18.0458
#5 1	31101.4	176.95	31278.3	99.4343	0.565727		#5 1	30312.8	8588.97	38901.8	77.9214	22.0786		21.5129
			without actin							with actin
	Sup Int	Pel Inten	Total Int	% Sup	% Pel			Sup Int	Pel Inten	Total Int	% Sup	% Pel
#6 1	35092.2	546.021	35638.2	98.4679	1.53212		#6 1	32154.2	11825.6	43979.8	73.1113	26.8887		25.3566
#6 2	76310.9	1193.8	77504.7	98.4597	1.54029		#6 2	69676.7	19296.6	88973.3	78.3119	21.6881		20.1478
#6 1	36780.2	442.192	37222.4	98.812	1.18797		#6 1	28063.3	9737.24	37800.6	74.2405	25.7595		24.5715
			without actin							with actin
	Sup Int	Pel Inten	Total Int	% Sup	% Pel			Sup Int	Pel Inten	Total Int	% Sup	% Pel
#7 1	33979.5	991.678	34971.2	97.1643	2.8357		#7 1	31323.5	13318.7	44642.3	70.1657	29.8343		26.9986
#7 2	70036.4	1366.46	71402.9	98.0863	1.91373		#7 2	53838.8	19911.1	73749.9	73.0019	26.9981		25.0844
#7 1	32280.4	602.607	32883	98.1674	1.83258		#7 1	27432.1	11705.6	39137.7	70.0913	29.9087		28.0761
			without actin							with actin
	Sup Int	Pel Inten	Total Int	% Sup	% Pel			Sup Int	Pel Inten	Total Int	% Sup	% Pel
#8 1	37319.7	798.092	38117.8	97.9062	2.09375		#8 1	33808.3	10885.9	44694.2	75.6436	24.3564		22.2627
#8 2	63527.5	458.264	63985.8	99.2838	0.716197		#8 2	51489.5	19572.3	71061.8	72.4574	27.5426		26.8264
#8 1	55753	1291.99	57045	97.7351	2.26486		#8	48396.7	14814.7	63211.4	76.5632	23.4368		21.1719
			without actin							with actin
	Sup Int	Pel Inten	Total Int	% Sup	% Pel			Sup Int	Pel Inten	Total Int	% Sup	% Pel
#9 1	38381.2	364.778	38746	99.0585	0.94146		#9 1	33423.1	16900.6	50323.8	66.4163	33.5837		32.6423
#9 2	60898.6	500.971	61399.6	99.1841	0.815919		#9 2	51490.5	27904.5	79395	64.8536	35.1464		34.3305
#9 1	38882.3	699.263	39581.6	98.2334	1.76664		#9 1	26424.1	13202.4	39626.6	66.6829	33.3171		31.5505
			without actin							with actin
	Sup Int	Pel Inten	Total Int	% Sup	% Pel			Sup Int	Pel Inten	Total Int	% Sup	% Pel
#10 1	55533.2	589.142	56122.4	98.9503	1.04975		#10 1	38174.3	30484.8	68659.1	55.5997	44.4003		43.3505
#10 1	26293.1	940.335	27233.5	96.5471	3.45286		#10 1	15268.3	20669	35937.3	42.486	57.514		54.0611
#10 2	36597.3	338.192	36935.5	99.0844	0.915629		#10 2	15001.4	12826.8	27828.2	53.9072	46.0928		45.1772
			without actin							with actin
	Sup Int	Pel Inten	Total Int	% Sup	% Pel			Sup Int	Pel Inten	Total Int	% Sup	% Pel
vector 1	51863.4	2456.84	54320.2	95.4771	4.52288		vector 1	31192.4	2010.17	33202.6	93.9457	6.05427		1.53138
vector 2	114319	4138.48	118457	96.5064	3.49365		vector 2	95029.5	5105.32	100135	94.9016	5.09845		1.6048
vector 3	86850.6	1227.11	88077.7	98.6068	1.39322		vector 3	95297.2	2403.88	97701.1	97.5396	2.46045		1.06723

## Sheet: Statistics
BSA	A	1.0335
BSA	A	0.423411
BSA	A	0.458163
WT	B	40.9884
WT	B	39.6366
WT	B	44.2457
Ala #1	C	27.8634
Ala #1	C	17.5988
Ala #1	C	32.9146
Ala #2	D	40.6153						diff	lwr	upr	p
Ala #2	D	37.5495					B-A	40.9852	31.0278	50.9426	0
Ala #2	D	45.2234					C-A	25.4873	15.5299	35.4447	1e-07
Ala #3	E	32.5425					D-A	40.4911	30.5337	50.4485	0
Ala #3	E	34.7962					E-A	33.8287	23.8713	43.7861	0
Ala #3	E	36.0625					F-A	34.4263	24.4689	44.3837	0
Ala #4	F	36.0415					G-A	19.4359	9.47852	29.3933	1.03e-05
Ala #4	F	32.6725					H-A	22.7203	12.7629	32.6777	6e-07		Summary: vector and BSA not significant, rest of them significant from BSA and vector
Ala #4	F	36.4801					I-A	26.0813	16.124	36.0387	0
Ala #5	G	20.6641					J-A	22.782	12.8246	32.7394	6e-07		Signficantly different from WT:			non different from WT:
Ala #5	G	18.0458					K-A	32.2027	22.2453	42.1601	0		1, 5, 6, 7, 8,			2, 3, 4, 9, 10
Ala #5	G	21.5129					L-A	46.8913	36.9339	56.8487	0
Ala #6	H	25.3566					M-A	0.762778	-9.19462	10.7202	1
Ala #6	H	20.1478					C-B	-15.498	-25.4554	-5.54056	0.0003622
Ala #6	H	24.5715					D-B	-0.494155	-10.4516	9.46324	1
Ala #7	I	26.9986					E-B	-7.1565	-17.1139	2.8009	0.351602
Ala #7	I	25.0844					F-B	-6.55889	-16.5163	3.39851	0.477336
Ala #7	I	28.0761					G-B	-21.5493	-31.5067	-11.5919	1.6e-06
Ala #8	J	22.2627					H-B	-18.265	-28.2224	-8.30756	2.91e-05
Ala #8	J	26.8264					I-B	-14.9039	-24.8613	-4.94647	0.0006255
Ala #8	J	21.1719					J-B	-18.2032	-28.1606	-8.24584	3.08e-05
Ala #9	K	32.6423					K-B	-8.78249	-18.7399	1.17491	0.123271
Ala #9	K	34.3305					L-B	5.90604	-4.05135	15.8634	0.627873
Ala #9	K	31.5505					M-B	-40.2224	-50.1798	-30.265	0
ala #10	L	43.3505					D-C	15.0038	5.04641	24.9612	0.0005706
ala #10	L	54.0611					E-C	8.34146	-1.61594	18.2989	0.168246
ala #10	L	45.1772					F-C	8.93907	-1.01832	18.8965	0.10994
vector	M	1.53138					G-C	-6.05134	-16.0087	3.90605	0.594105
vector	M	1.6048					H-C	-2.767	-12.7244	7.1904	0.997581
vector	M	1.06723					I-C	0.594092	-9.3633	10.5515	1
							J-C	-2.70528	-12.6627	7.25211	0.998033
							K-C	6.71547	-3.24193	16.6729	0.442722
							L-C	21.404	11.4466	31.3614	1.9e-06
							M-C	-24.7245	-34.6819	-14.7671	1e-07
							E-D	-6.66235	-16.6197	3.29505	0.454354
							F-D	-6.06473	-16.0221	3.89267	0.590987
							G-D	-21.0551	-31.0125	-11.0977	2.5e-06
							H-D	-17.7708	-27.7282	-7.81341	4.55e-05
							I-D	-14.4097	-24.3671	-4.45231	0.0009852
							J-D	-17.7091	-27.6665	-7.75169	4.81e-05
							K-D	-8.28833	-18.2457	1.66906	0.174458
							L-D	6.4002	-3.5572	16.3576	0.513292
							M-D	-39.7283	-49.6857	-29.7709	0
							F-E	0.597615	-9.35978	10.555	1
							G-E	-14.3928	-24.3502	-4.43541	0.0010007
							H-E	-11.1085	-21.0659	-1.15106	0.0191234
							I-E	-7.74737	-17.7048	2.21003	0.248307
							J-E	-11.0467	-21.0041	-1.08934	0.0201642
							K-E	-1.62599	-11.5834	8.33141	0.999989
							L-E	13.0625	3.10515	23.0199	0.0033766
							M-E	-33.0659	-43.0233	-23.1085	0
							G-F	-14.9904	-24.9478	-5.03302	0.0005776
							H-F	-11.7061	-21.6635	-1.74868	0.0113703
							I-F	-8.34498	-18.3024	1.61241	0.16784
							J-F	-11.6444	-21.6018	-1.68696	0.0120038
							K-F	-2.2236	-12.181	7.73379	0.999703
							L-F	12.4649	2.50753	22.4223	0.0057915
							M-F	-33.6636	-43.6209	-23.7062	0
							H-G	3.28434	-6.67305	13.2417	0.98933
							I-G	6.64544	-3.31196	16.6028	0.458082
							J-G	3.34606	-6.61134	13.3035	0.987589
							K-G	12.7668	2.80942	22.7242	0.0044132
							L-G	27.4553	17.4979	37.4127	0
							M-G	-18.6731	-28.6305	-8.71574	2.02e-05
							I-H	3.36109	-6.5963	13.3185	0.987133
							J-H	0.0617178	-9.89568	10.0191	1
							K-H	9.48247	-0.474927	19.4399	0.0728348
							L-H	24.171	14.2136	34.1284	2e-07
							M-H	-21.9575	-31.9149	-12.0001	1.2e-06
							J-I	-3.29937	-13.2568	6.65802	0.988925
							K-I	6.12138	-3.83602	16.0788	0.577794
							L-I	20.8099	10.8525	30.7673	3.1e-06
							M-I	-25.3186	-35.276	-15.3612	1e-07
							K-J	9.42075	-0.536644	19.3781	0.0764029
							L-J	24.1093	14.1519	34.0667	2e-07
							M-J	-22.0192	-31.9766	-12.0618	1.1e-06
							L-K	14.6885	4.73114	24.6459	0.0007625
							M-K	-31.4399	-41.3973	-21.4826	0
							M-L	-46.1285	-56.0859	-36.1711	0
