# Supplementary material for: The intrinsically disordered cytoplasmic tail of a dendrite branching receptor uses two distinct mechanisms to regulate the actin cytoskeleton
Source: eLife journal article supplement (doi:10.7554/elife.88492), 2023-07-17
Supplement: fig7-data2 [file Figure 7B Source Data.xlsx]

## Sheet: empty vector #1
	# of filaments (at start)
	14										CRITERIA:	Must be present for longer than one frame
							900 seconds, 1801 frames					Must move with filament at least once
	# events (total)						0.499722	s/frame				Must move along filament for more than 3 frames
	1											Must be smaller than 4x4 pixel circle
	events per filament (average)
Filament	Event	x	y	Frame on	Time on	Frame off	Time off	Duration	Position (end/middle/etc,)		Position (side/middle)
1	no events
Filament	Event	x	y	Frame on	Time on	Frame off	Time off	Duration	Position (end/middle/etc,)		Position (side/middle)
2	no events
Filament	Event	x	y	Frame on	Time on	Frame off	Time off	Duration	Position (end/middle/etc,)		Position (side/middle)
3	no events
Filament	Event	x	y	Frame on	Time on	Frame off	Time off	Duration	Position (end/middle/etc,)		Position (side/middle)
4	no events
Filament	Event	x	y	Frame on	Time on	Frame off	Time off	Duration	Position (end/middle/etc,)
5	1	43.36	2.56	1		256			barbed end	side
Filament	Event	x	y	Frame on	Time on	Frame off	Time off	Duration	Position (end/middle/etc,)
6	no events
Filament	Event	x	y	Frame on	Time on	Frame off	Time off	Duration	Position (end/middle/etc,)
7	no events
Filament	Event	x	y	Frame on	Time on	Frame off	Time off	Duration	Position (end/middle/etc,)
8	no events
Filament	Event	x	y	Frame on	Time on	Frame off	Time off	Duration	Position (end/middle/etc,)
9	no events
Filament	Event	x	y	Frame on	Time on	Frame off	Time off	Duration	Position (end/middle/etc,)
10	no events
Filament	Event	x	y	Frame on	Time on	Frame off	Time off	Duration	Position (end/middle/etc,)
11	no events
Filament	Event	x	y	Frame on	Time on	Frame off	Time off	Duration	Position (end/middle/etc,)
12	no events
Filament	Event	x	y	Frame on	Time on	Frame off	Time off	Duration	Position (end/middle/etc,)
13	no events

## Sheet: HPO30 #2
	# of filaments (at start)
	19										CRITERIA:	Must be present for longer than one frame
							900 seconds, 1801 frames					Must move with filament at least once
	# events (total)						0.499722	s/frame				Must move along filament for more than 3 frames
	8											Must be smaller than 4x4 pixel circle
	events per filament (average)
Filament	Event	x	y	Frame on	Time on	Frame off	Time off	Duration	Position (end/middle/etc,)		Position (side/middle)
1	no events
Filament	Event	x	y	Frame on	Time on	Frame off	Time off	Duration	Position (end/middle/etc,)		Position (side/middle)
2	no events
Filament	Event	x	y	Frame on	Time on	Frame off	Time off	Duration	Position (end/middle/etc,)		Position (side/middle)
3	no events
Filament	Event	x	y	Frame on	Time on	Frame off	Time off	Duration	Position (end/middle/etc,)		Position (side/middle)
4	1	19.2	24.16	10		201			near pointed end?		middle
Filament	Event	x	y	Frame on	Time on	Frame off	Time off	Duration	Position (end/middle/etc,)
5	no events
Filament	Event	x	y	Frame on	Time on	Frame off	Time off	Duration	Position (end/middle/etc,)
6	1	40	18.72	112		138			pointed end		side
	2	33.44	16.96	1637		1685			middle/barbed end		middle
Filament	Event	x	y	Frame on	Time on	Frame off	Time off	Duration	Position (end/middle/etc,)
7	no events
Filament	Event	x	y	Frame on	Time on	Frame off	Time off	Duration	Position (end/middle/etc,)
8	no events
Filament	Event	x	y	Frame on	Time on	Frame off	Time off	Duration	Position (end/middle/etc,)
9	1	64.32	11.36	1729		1751			pointed end		middle
Filament	Event	x	y	Frame on	Time on	Frame off	Time off	Duration	Position (end/middle/etc,)
10	no events
Filament	Event	x	y	Frame on	Time on	Frame off	Time off	Duration	Position (end/middle/etc,)
11	no events
Filament	Event	x	y	Frame on	Time on	Frame off	Time off	Duration	Position (end/middle/etc,)
12	no events
Filament	Event	x	y	Frame on	Time on	Frame off	Time off	Duration	Position (end/middle/etc,)
13	no events
Filament	Event	x	y	Frame on	Time on	Frame off	Time off	Duration	Position (end/middle/etc,)
14	1	61.6	35.52	1			108		barbed end
Filament	Event	x	y	Frame on	Time on	Frame off	Time off	Duration	Position (end/middle/etc,)
15	1	58.56	40.48	194		1801			starts at barbed end, as filament grows it moves toward middle
Filament	Event	x	y	Frame on	Time on	Frame off	Time off	Duration	Position (end/middle/etc,)
16	1	45.6	49.28	1075		1801			middle on the side
Filament	Event	x	y	Frame on	Time on	Frame off	Time off	Duration	Position (end/middle/etc,)
17	1	32.32	66.88	72		130			middle
Filament	Event	x	y	Frame on	Time on	Frame off	Time off	Duration	Position (end/middle/etc,)
18	1	22.88	68.96	1		30			barbed end, side
Filament	Event	x	y	Frame on	Time on	Frame off	Time off	Duration	Position (end/middle/etc,)
19	none

## Sheet: empty vector #3
	# of filaments (at start)
	15										CRITERIA:	Must be present for longer than one frame
							900 seconds, 1801 frames					Must move with filament at least once
	# events (total)						0.499722	s/frame				Must move along filament for more than 3 frames
	0											Must be smaller than 4x4 pixel circle
	events per filament (average)
Filament	Event	x	y	Frame on	Time on	Frame off	Time off	Duration	Position (end/middle/etc,)		Position (side/middle)
1	no events
Filament	Event	x	y	Frame on	Time on	Frame off	Time off	Duration	Position (end/middle/etc,)		Position (side/middle)
2	no events
Filament	Event	x	y	Frame on	Time on	Frame off	Time off	Duration	Position (end/middle/etc,)		Position (side/middle)
3	no events
Filament	Event	x	y	Frame on	Time on	Frame off	Time off	Duration	Position (end/middle/etc,)		Position (side/middle)
4	no events
Filament	Event	x	y	Frame on	Time on	Frame off	Time off	Duration	Position (end/middle/etc,)
5	no events
Filament	Event	x	y	Frame on	Time on	Frame off	Time off	Duration	Position (end/middle/etc,)
6	no events
Filament	Event	x	y	Frame on	Time on	Frame off	Time off	Duration	Position (end/middle/etc,)
7	no events
Filament	Event	x	y	Frame on	Time on	Frame off	Time off	Duration	Position (end/middle/etc,)
8	no events
Filament	Event	x	y	Frame on	Time on	Frame off	Time off	Duration	Position (end/middle/etc,)
9	no events
Filament	Event	x	y	Frame on	Time on	Frame off	Time off	Duration	Position (end/middle/etc,)
10	no events
Filament	Event	x	y	Frame on	Time on	Frame off	Time off	Duration	Position (end/middle/etc,)
11	no events
Filament	Event	x	y	Frame on	Time on	Frame off	Time off	Duration	Position (end/middle/etc,)
12	no events
Filament	Event	x	y	Frame on	Time on	Frame off	Time off	Duration	Position (end/middle/etc,)
13	no events
Filament	Event	x	y	Frame on	Time on	Frame off	Time off	Duration	Position (end/middle/etc,)
14	no events
Filament	Event	x	y	Frame on	Time on	Frame off	Time off	Duration	Position (end/middle/etc,)
15	no events

## Sheet: HPO30 #3
	# of filaments (at start)
	24										CRITERIA:	Must be present for longer than one frame
							900 seconds, 1801 frames					Must move with filament at least once
	# events (total)						0.499722	s/frame				Must move along filament for more than 3 frames
	6											Must be smaller than 4x4 pixel circle
	events per filament (average)
Filament	Event	x	y	Frame on	Time on	Frame off	Time off	Duration	Position (end/middle/etc,)		Position (side/middle)
1	no events
Filament	Event	x	y	Frame on	Time on	Frame off	Time off	Duration	Position (end/middle/etc,)		Position (side/middle)
2	no events
Filament	Event	x	y	Frame on	Time on	Frame off	Time off	Duration	Position (end/middle/etc,)		Position (side/middle)
3	no events
Filament	Event	x	y	Frame on	Time on	Frame off	Time off	Duration	Position (end/middle/etc,)		Position (side/middle)
4	no events
Filament	Event	x	y	Frame on	Time on	Frame off	Time off	Duration	Position (end/middle/etc,)
5	no events
Filament	Event	x	y	Frame on	Time on	Frame off	Time off	Duration	Position (end/middle/etc,)
6	no events
Filament	Event	x	y	Frame on	Time on	Frame off	Time off	Duration	Position (end/middle/etc,)
7	1	37.92	26.72	1458		1464			middle
Filament	Event	x	y	Frame on	Time on	Frame off	Time off	Duration	Position (end/middle/etc,)
8	1	47.84	26.08	37		445			middle/middle
Filament	Event	x	y	Frame on	Time on	Frame off	Time off	Duration	Position (end/middle/etc,)
9	1	60	20.8	249		447
Filament	Event	x	y	Frame on	Time on	Frame off	Time off	Duration	Position (end/middle/etc,)
10	no events
Filament	Event	x	y	Frame on	Time on	Frame off	Time off	Duration	Position (end/middle/etc,)
11	discard, leavse frame after maybe 5 minutes
Filament	Event	x	y	Frame on	Time on	Frame off	Time off	Duration	Position (end/middle/etc,)
12	no events
Filament	Event	x	y	Frame on	Time on	Frame off	Time off	Duration	Position (end/middle/etc,)
13	no events
Filament	Event	x	y	Frame on	Time on	Frame off	Time off	Duration	Position (end/middle/etc,)
14	1	12.96	42.08	1779		1801
Filament	Event	x	y	Frame on	Time on	Frame off	Time off	Duration	Position (end/middle/etc,)
15	no events
Filament	Event	x	y	Frame on	Time on	Frame off	Time off	Duration	Position (end/middle/etc,)
16	no real events
Filament	Event	x	y	Frame on	Time on	Frame off	Time off	Duration	Position (end/middle/etc,)
17	no events
Filament	Event	x	y	Frame on	Time on	Frame off	Time off	Duration	Position (end/middle/etc,)
18	1	25.92	58.4	1681		1801
Filament	Event	x	y	Frame on	Time on	Frame off	Time off	Duration	Position (end/middle/etc,)
19	1	4.64	64.48	1436		1501
Filament	Event	x	y	Frame on	Time on	Frame off	Time off	Duration	Position (end/middle/etc,)
20	no events
Filament	Event	x	y	Frame on	Time on	Frame off	Time off	Duration	Position (end/middle/etc,)
21	no events
Filament	Event	x	y	Frame on	Time on	Frame off	Time off	Duration	Position (end/middle/etc,)
22	no events
Filament	Event	x	y	Frame on	Time on	Frame off	Time off	Duration	Position (end/middle/etc,)
23	no events
Filament	Event	x	y	Frame on	Time on	Frame off	Time off	Duration	Position (end/middle/etc,)
24	no events
Filament	Event	x	y	Frame on	Time on	Frame off	Time off	Duration	Position (end/middle/etc,)
25	no events

## Sheet: HPO30 #1
	# of filaments (at start)
	27										CRITERIA:	Must be present for longer than one frame
							900 seconds, 1801 frames					Must move with filament at least once
	# events (total)						0.499722	s/frame				Must move along filament for more than 3 frames
	9											Must be smaller than 4x4 pixel circle
	events per filament (average)
Filament	Event	x	y	Frame on	Time on	Frame off	Time off	Duration	Position (end/middle/etc,)		Position (side/middle)
1	no events
Filament	Event	x	y	Frame on	Time on	Frame off	Time off	Duration	Position (end/middle/etc,)		Position (side/middle)
2	no events
Filament	Event	x	y	Frame on	Time on	Frame off	Time off	Duration	Position (end/middle/etc,)		Position (side/middle)
3	no events
Filament	Event	x	y	Frame on	Time on	Frame off	Time off	Duration	Position (end/middle/etc,)		Position (side/middle)
4	no events
Filament	Event	x	y	Frame on	Time on	Frame off	Time off	Duration	Position (end/middle/etc,)
5	no events
Filament	Event	x	y	Frame on	Time on	Frame off	Time off	Duration	Position (end/middle/etc,)
6	no events
Filament	Event	x	y	Frame on	Time on	Frame off	Time off	Duration	Position (end/middle/etc,)
7	no events
Filament	Event	x	y	Frame on	Time on	Frame off	Time off	Duration	Position (end/middle/etc,)
8	1	40.16	24.32	563			580
Filament	Event	x	y	Frame on	Time on	Frame off	Time off	Duration	Position (end/middle/etc,)
9	no events
Filament	Event	x	y	Frame on	Time on	Frame off	Time off	Duration	Position (end/middle/etc,)
10	discard, moves out of frame too early
Filament	Event	x	y	Frame on	Time on	Frame off	Time off	Duration	Position (end/middle/etc,)
11	no events
Filament	Event	x	y	Frame on	Time on	Frame off	Time off	Duration	Position (end/middle/etc,)
12	1	67.04	23.36	1627		1801			middle/barbed end
Filament	Event	x	y	Frame on	Time on	Frame off	Time off	Duration	Position (end/middle/etc,)
13	1	70.08	28.32	492		963			capping?
Filament	Event	x	y	Frame on	Time on	Frame off	Time off	Duration	Position (end/middle/etc,)
14	no events
Filament	Event	x	y	Frame on	Time on	Frame off	Time off	Duration	Position (end/middle/etc,)
15	1	40.48	40.64	2			220		pointed end
	2	41.28	40	19			213		pointed end
Filament	Event	x	y	Frame on	Time on	Frame off	Time off	Duration	Position (end/middle/etc,)
16	no events
Filament	Event	x	y	Frame on	Time on	Frame off	Time off	Duration	Position (end/middle/etc,)
17	1	23.2	55.84	73			1583		close to barbed end, but filament still grows
Filament	Event	x	y	Frame on	Time on	Frame off	Time off	Duration	Position (end/middle/etc,)
18	no events
Filament	Event	x	y	Frame on	Time on	Frame off	Time off	Duration	Position (end/middle/etc,)
19	no events
Filament	Event	x	y	Frame on	Time on	Frame off	Time off	Duration	Position (end/middle/etc,)
20	1	11.68	72.8	1227		1370			pointed end
Filament	Event	x	y	Frame on	Time on	Frame off	Time off	Duration	Position (end/middle/etc,)
21	no events
Filament	Event	x	y	Frame on	Time on	Frame off	Time off	Duration	Position (end/middle/etc,)
22	1	46.4	66.4	306		412			barbed end
Filament	Event	x	y	Frame on	Time on	Frame off	Time off	Duration	Position (end/middle/etc,)
23	no events
Filament	Event	x	y	Frame on	Time on	Frame off	Time off	Duration	Position (end/middle/etc,)
24	no events
Filament	Event	x	y	Frame on	Time on	Frame off	Time off	Duration	Position (end/middle/etc,)
25	no events
Filament	Event	x	y	Frame on	Time on	Frame off	Time off	Duration	Position (end/middle/etc,)
26	1	59.84	62.24	1		103			middle
Filament	Event	x	y	Frame on	Time on	Frame off	Time off	Duration	Position (end/middle/etc,)
27	no events
Filament	Event	x	y	Frame on	Time on	Frame off	Time off	Duration	Position (end/middle/etc,)
28	1	76.64	40.16	1		1801			pointed end

## Sheet: empty vector #2
	# of filaments (at start)
	17										CRITERIA:	Must be present for longer than one frame
							900 seconds, 1801 frames					Must move with filament at least once
	# events (total)						0.499722	s/frame				Must move along filament for more than 3 frames
	2											Must be smaller than 4x4 pixel circle
	events per filament (average)
Filament	Event	x	y	Frame on	Time on	Frame off	Time off	Duration	Position (end/middle/etc,)		Position (side/middle)
1	no events
Filament	Event	x	y	Frame on	Time on	Frame off	Time off	Duration	Position (end/middle/etc,)		Position (side/middle)
2	no events
Filament	Event	x	y	Frame on	Time on	Frame off	Time off	Duration	Position (end/middle/etc,)		Position (side/middle)
3	no events
Filament	Event	x	y	Frame on	Time on	Frame off	Time off	Duration	Position (end/middle/etc,)		Position (side/middle)
4	no events
Filament	Event	x	y	Frame on	Time on	Frame off	Time off	Duration	Position (end/middle/etc,)
5	no events
Filament	Event	x	y	Frame on	Time on	Frame off	Time off	Duration	Position (end/middle/etc,)
6	no events
Filament	Event	x	y	Frame on	Time on	Frame off	Time off	Duration	Position (end/middle/etc,)
7	no events
Filament	Event	x	y	Frame on	Time on	Frame off	Time off	Duration	Position (end/middle/etc,)
8	no events
Filament	Event	x	y	Frame on	Time on	Frame off	Time off	Duration	Position (end/middle/etc,)
9	1	73.44	39.84	1017		1799			barbed end
Filament	Event	x	y	Frame on	Time on	Frame off	Time off	Duration	Position (end/middle/etc,)
10	no events
Filament	Event	x	y	Frame on	Time on	Frame off	Time off	Duration	Position (end/middle/etc,)
11	no events
Filament	Event	x	y	Frame on	Time on	Frame off	Time off	Duration	Position (end/middle/etc,)
12	no events
Filament	Event	x	y	Frame on	Time on	Frame off	Time off	Duration	Position (end/middle/etc,)
13	no events
Filament	Event	x	y	Frame on	Time on	Frame off	Time off	Duration	Position (end/middle/etc,)
14	no events
Filament	Event	x	y	Frame on	Time on	Frame off	Time off	Duration	Position (end/middle/etc,)
15	1	17.12	62.4	378		1801			barbed end
Filament	Event	x	y	Frame on	Time on	Frame off	Time off	Duration	Position (end/middle/etc,)
16	no events
Filament	Event	x	y	Frame on	Time on	Frame off	Time off	Duration	Position (end/middle/etc,)
17	no events

## Sheet: stats for side binding
	proportion with events								# of events/filament
									HPO30	vector
	HPO30	vector						filament 1	0	0			HPO30 - 0 events	vector - 0 events		HPO30 - 1 event	vector - 1 event		HPO30 - 2 events	vector - 2 events
1	0.333333	0.0714286						filament 2	0	0		1	0.666667	0.928571		0.222222	0.0714286		0.037037	0
2	0.421053	0.117647						filament 3	0	0		2	0.578947	0.882353		0.368421	0.117647		0.0526316	0
3	0.25	0						filament 4	0	0		3	0.75	1		0.25	0		0	0
				t-Test: Paired Two Sample for Means				filament 5	0	0
avg	0.334795	0.0630252						filament 6	0	0			0.665205	0.936975		0.280214	0.0630252		0.0298895	0
std dev	0.0855357	0.059272		t-Test: Paired Two Sample for Means				filament 7	0	0			0.0855357	0.059272		0.0776415	0.059272		0.027034	0
				HPO30 vs vector				filament 8	0	0
					Variable 1	Variable 2		filament 9	0	0		t-Test: Paired Two Sample for Means				t-Test: Paired Two Sample for Means				t-Test: Paired Two Sample for Means
				Mean	0.334795	0.0630252		filament 10	0	0		HPO30 vs vector 0 events				HPO30 vs vector 1 event				HPO30 vs vector 2 events
				Variance	0.00731635	0.00351317		filament 11	0	0			Variable 1	Variable 2			Variable 1	Variable 2			Variable 1	Variable 2
				Observations	3	3		filament 12	0	0		Mean	0.665205	0.936975		Mean	0.280214	0.0630252		Mean	0.0298895	0
				Pearson Correlation	0.990508			filament 13	0	0		Variance	0.00731635	0.00351317		Variance	0.00602821	0.00351317		Variance	0.000730836	0
				Hypothesized Mean Difference	0			filament 14	0	1		Observations	3	3		Observations	3	3		Observations	3	3
				df	2			filament 15	0	0		Pearson Correlation	0.990508			Pearson Correlation	0.677422			Pearson Correlation	#DIV/0!
				t Stat	16.7897			filament 16	0	0		Hypothesized Mean Difference	0			Hypothesized Mean Difference	0			Hypothesized Mean Difference	0
				P(T<=t) one-tail	0.00176434			filament 17	0	0		df	2			df	2			df	2
				t Critical one-tail	2.91999			filament 18	0	0		t Stat	-16.7897			t Stat	6.54213			t Stat	1.91501
				P(T<=t) two-tail	0.00352868			filament 19	1	0		P(T<=t) one-tail	0.00176434			P(T<=t) one-tail	0.0112883			P(T<=t) one-tail	0.097789
				t Critical two-tail	4.30265			filament 20	1	0		t Critical one-tail	2.91999			t Critical one-tail	2.91999			t Critical one-tail	2.91999
				p<.01				filament 21	1	0		P(T<=t) two-tail	0.00352868			P(T<=t) two-tail	0.0225765			P(T<=t) two-tail	0.195578
								filament 22	1	0		t Critical two-tail	4.30265			t Critical two-tail	4.30265			t Critical two-tail	4.30265
								filament 23	1	0		p<.01				p < .05				not significant
								filament 24	1	0
								filament 25	1	0
								filament 26	1	0
								filament 27	2	0
								filament 28	0	0
								filament 29	0	0
								filament 30	0	1
								filament 31	0	1
								filament 32	0	0
								filament 33	0	0
								filament 34	0	0
								filament 35	0	0
								filament 36	0	0
								filament 37	0	0
								filament 38	0	0
								filament 39	1	0
								filament 40	1	0
								filament 41	1	0
								filament 42	1	0
								filament 43	1	0
								filament 44	1	0
								filament 45	1	0
								filament 46	2	0
								filament 47	0
								filament 48	0
								filament 49	0
								filament 50	0
								filament 51	0
								filament 52	0
								filament 53	0
								filament 54	0
								filament 55	0
								filament 56	0
								filament 57	0
								filament 58	0
								filament 59	0
								filament 60	0
								filament 61	0
								filament 62	0
								filament 63	0
								filament 64	0
								filament 65	1
								filament 66	1
								filament 67	1
								filament 68	1
								filament 69	1
								filament 70	1
								avg	0.357143	0.0652174
								std dev	0.539342	0.249637
