# Supplementary material for: The intrinsically disordered cytoplasmic tail of a dendrite branching receptor uses two distinct mechanisms to regulate the actin cytoskeleton
Source: eLife journal article supplement (doi:10.7554/elife.88492), 2023-07-17
Supplement: fig7-data2 [file Figure 7C Source Data.xlsx]

## Sheet: compiled
	actin	HPO30 + Rap	HPO30 + DMSO	vector + rap	CapZ
filament 1	2.36238	1.54095	1.60191	2.53085	0.563431
filament 2	2.45187	0.35528	1.97906	2.639	0
filament 3	2.70226	1.2769	2.19517	2.65301	0.613197
filament 4	2.19975	1.45349	2.10267	2.35833	0.181752
filament 5	2.65106	1.63723	1.84073	2.56719	0.714026
filament 6	2.84251	1.32988	2.18676	2.57989	0.346194
filament 7	0.897454	1.45433	1.63134	2.51115	0.00865486
filament 8	2.55684	1.16927	0.656742	2.47174	0.030292
filament 9	2.2715	1.35805	2.16321	2.4354	0.0272628
filament 10	2.71603	1.80373	2.08333	1.96951	0.265704
filament 11	2.5491	1.65026	1.94122	2.64251	0.0601513
filament 12	2.24235	1.12849	1.72132	2.69505	0.000865486
filament 13	2.50392	1.61831	1.9408	2.79138	0.320663
filament 14	2.6872	1.23402	1.49764	2.14947	0.66729
filament 15	2.65278	1.52497	2.10309	2.26761	0.265704
filament 16	0.326543	1.31643	1.90211	2.20621	0.695851
filament 17	2.43767	1.49428	2.02152	2.15726	0.201658
filament 18	2.7242	1.08013	2.00176	2.0162	0.194302
filament 19	2.34646	1.61705	2.1506	2.35127	0.0714026
filament 20	2.83907	1.66456	1.82349	2.10475	0.807931
filament 21	2.04575	0.980067	2.12199	2.42024
filament 22	2.43478	1.30676	2.14597	2.19597
filament 23	2.31469	1.72721	2.10752	2.21911
filament 24	2.57643	1.54011	2.39153	2.37975
filament 25	2.23392	1.65152	2.29314	1.99618
filament 26	2.38869	1.64143	2.45933	2.21244
filament 27	2.47875	1.39001	2.31505	2.25871
filament 28	0.663876	1.55861	2.76216	2.3219
filament 29	2.56924	1.61957	2.07776	2.21867
filament 30	1.15438	1.10326	2.3874	2.28853
filament 31	2.93797	1.83667	2.14638	1.48845
filament 32	2.57347	1.59555	2.41096	2.00863
filament 33	2.49947	1.78471	2.20054	2.31478
filament 34	1.96457	0.670149	1.92604	2.31701
filament 35	2.54472	1.11414	2.41882	1.90673
filament 36	2.40898	1.62382	2.37706	2.4611
filament 37	2.77137	1.13826	2.24477	2.05787
filament 38	2.4648	1.57643	1.54903	1.62883
filament 39	2.44408	1.37148	1.71743	1.7257
filament 40	2.32441	1.37273	1.72711	0.279787
filament 41	2.23361	1.65417	1.54991	2.183
filament 42	2.27869	1.61842	1.50726	1.88035
filament 43	2.38884	1.66249	1.83395	1.77351
filament 44	1.8181	1.08005	1.59344	2.16596
filament 45	2.19533	1.65126	1.03547	1.27712
filament 46	1.08661	1.36607	1.65851	2.00049
filament 47	2.36247	1.6496	1.75481	2.02336
filament 48	2.48495	1.28459	1.44395	1.81217
filament 49	2.77883	1.39231	1.75525	1.9531
filament 50	1.84447	1.92017	1.75788	1.82713
filament 51	2.62998	1.79939	1.58113	1.86954
filament 52	2.27103	1.55995	1.33226	1.93689
filament 53	2.29272	1.93251	1.69501	1.45838
filament 54	2.18343	1.7441	1.62862	2.01796
filament 55	2.03543	1.57144	1.76052
filament 56	2.36545	1.61056	1.64488
filament 57	1.82236	1.76282	2.18351
filament 58	2.18045	1.76834	2.64562
filament 59	2.47687	1.89466	2.52954
filament 60	2.51557	1.66202	2.87514
filament 61	1.45151	1.71603	1.54903
filament 62	2.32632	1.62502	1.53936
filament 63	1.45108	1.55655	2.61264
filament 64	2.30761	1.8079	1.96454
filament 65	2.31697	1.53571	2.6144
filament 66	2.4437	1.55995	2.16768
filament 67	2.56789	1.51232	2.55373
filament 68	2.12686	1.63651	2.46579
filament 69	2.45561	1.81385	1.80493
filament 70	2.61552	1.45171	2.16812
filament 71	2.52408	1.73987	2.56999
filament 72	2.34886	1.83433
filament 73	2.49984	1.58621
filament 74	2.11113	1.62234
filament 75	2.46879	1.37596
filament 76	2.39437	1.85087
filament 77	2.23616	1.62234
filament 78	2.24254	1.68851
filament 79		1.24189
filament 80		1.57533
filament 81		1.45606
filament 82		1.17442
filament 83
average	2.28063	1.51072	1.98734	2.12921	0.301817
std dev	0.475168	0.272261	0.409969	0.415222	0.276201
% of actin	1	0.662411	0.8714	0.933603	0.132339

## Sheet: statistics
	group	rate
1	A	2.36238
2	A	2.45187
3	A	2.70226
4	A	2.19975		A	actin alone
5	A	2.65106		B	HPO30 + rap
6	A	2.84251		C	HPO30 + dmso							* for p<.05
7	A	0.897454		D	vecotr + rap							** for p<.05
8	A	2.55684		E	capZ							*** for p<.001
9	A	2.2715					diff	lwr	upr	p	adj
10	A	2.71603				B-A	-0.769916	-0.941043	-0.59879	0		***	actin vs HPO30 + rap
11	A	2.5491				C-A	-0.293289	-0.470761	-0.115818	8.11e-05		***	actin vs HPO30 + dmso
12	A	2.24235				D-A	-0.176354	-0.367892	0.0151832	0.0874317			actin vs empty vector
13	A	2.50392				E-A	-1.97882	-2.25	-1.70763	0		***	actin vs CapZ
14	A	2.6872				C-B	0.476627	0.30123	0.652024	0		***	HPO30 + dmso vs HPO30 + rap
15	A	2.65278				D-B	0.593562	0.403945	0.783179	0		***	empty vector vs HPO30 + rap
16	A	0.326543				E-B	-1.2089	-1.47873	-0.93907	0		***	CapZ vs HPO30 + rap
17	A	2.43767				D-C	0.116935	-0.0784275	0.312297	0.471329			empty vector vs HPO30 + DMSO
18	A	2.7242				E-C	-1.68553	-1.95942	-1.41163	0		***	capZ vs HPO30 + DMSO
19	A	2.34646				E-D	-1.80246	-2.08568	-1.51925	0		***	CapZ vs empty vector + rap
20	A	2.83907
21	A	2.04575
22	A	2.43478
23	A	2.31469
24	A	2.57643
25	A	2.23392					actin alone	HPO30 + rap	HPO30 + dmso	vector + rap	capZ
26	A	2.38869				average	2.28063	1.51072	1.98734	2.12921	0.301817
27	A	2.47875				std dev	0.475168	0.272261	0.409969	0.415222	0.276201
28	A	0.663876				% of actin	1	0.662411	0.8714	0.933603	0.132339
29	A	2.56924
30	A	1.15438
31	A	2.93797
32	A	2.57347
33	A	2.49947
34	A	1.96457
35	A	2.54472
36	A	2.40898
37	A	2.77137
38	A	2.4648
39	A	2.44408
40	A	2.32441
41	A	2.23361
42	A	2.27869
43	A	2.38884
44	A	1.8181
45	A	2.19533
46	A	1.08661
47	A	2.36247
48	A	2.48495
49	A	2.77883
50	A	1.84447
51	A	2.62998
52	A	2.27103
53	A	2.29272
54	A	2.18343
55	A	2.03543
56	A	2.36545
57	A	1.82236
58	A	2.18045
59	A	2.47687
60	A	2.51557
61	A	1.45151
62	A	2.32632
63	A	1.45108
64	A	2.30761
65	A	2.31697
66	A	2.4437
67	A	2.56789
68	A	2.12686
69	A	2.45561
70	A	2.61552
71	A	2.52408
72	A	2.34886
73	A	2.49984
74	A	2.11113
75	A	2.46879
76	A	2.39437
77	A	2.23616
78	A	2.24254
79	B	1.54095
80	B	0.35528
81	B	1.2769
82	B	1.45349
83	B	1.63723
84	B	1.32988
85	B	1.45433
86	B	1.16927
87	B	1.35805
88	B	1.80373
89	B	1.65026
90	B	1.12849
91	B	1.61831
92	B	1.23402
93	B	1.52497
94	B	1.31643
95	B	1.49428
96	B	1.08013
97	B	1.61705
98	B	1.66456
99	B	0.980067
100	B	1.30676
101	B	1.72721
102	B	1.54011
103	B	1.65152
104	B	1.64143
105	B	1.39001
106	B	1.55861
107	B	1.61957
108	B	1.10326
109	B	1.83667
110	B	1.59555
111	B	1.78471
112	B	0.670149
113	B	1.11414
114	B	1.62382
115	B	1.13826
116	B	1.57643
117	B	1.37148
118	B	1.37273
119	B	1.65417
120	B	1.61842
121	B	1.66249
122	B	1.08005
123	B	1.65126
124	B	1.36607
125	B	1.6496
126	B	1.28459
127	B	1.39231
128	B	1.92017
129	B	1.79939
130	B	1.55995
131	B	1.93251
132	B	1.7441
133	B	1.57144
134	B	1.61056
135	B	1.76282
136	B	1.76834
137	B	1.89466
138	B	1.66202
139	B	1.71603
140	B	1.62502
141	B	1.55655
142	B	1.8079
143	B	1.53571
144	B	1.55995
145	B	1.51232
146	B	1.63651
147	B	1.81385
148	B	1.45171
149	B	1.73987
150	B	1.83433
151	B	1.58621
152	B	1.62234
153	B	1.37596
154	B	1.85087
155	B	1.62234
156	B	1.68851
157	B	1.24189
158	B	1.57533
159	B	1.45606
160	B	1.17442
161	C	1.60191
162	C	1.97906
163	C	2.19517
164	C	2.10267
165	C	1.84073
166	C	2.18676
167	C	1.63134
168	C	0.656742
169	C	2.16321
170	C	2.08333
171	C	1.94122
172	C	1.72132
173	C	1.9408
174	C	1.49764
175	C	2.10309
176	C	1.90211
177	C	2.02152
178	C	2.00176
179	C	2.1506
180	C	1.82349
181	C	2.12199
182	C	2.14597
183	C	2.10752
184	C	2.39153
185	C	2.29314
186	C	2.45933
187	C	2.31505
188	C	2.76216
189	C	2.07776
190	C	2.3874
191	C	2.14638
192	C	2.41096
193	C	2.20054
194	C	1.92604
195	C	2.41882
196	C	2.37706
197	C	2.24477
198	C	1.54903
199	C	1.71743
200	C	1.72711
201	C	1.54991
202	C	1.50726
203	C	1.83395
204	C	1.59344
205	C	1.03547
206	C	1.65851
207	C	1.75481
208	C	1.44395
209	C	1.75525
210	C	1.75788
211	C	1.58113
212	C	1.33226
213	C	1.69501
214	C	1.62862
215	C	1.76052
216	C	1.64488
217	C	2.18351
218	C	2.64562
219	C	2.52954
220	C	2.87514
221	C	1.54903
222	C	1.53936
223	C	2.61264
224	C	1.96454
225	C	2.6144
226	C	2.16768
227	C	2.55373
228	C	2.46579
229	C	1.80493
230	C	2.16812
231	C	2.56999
232	D	2.53085
233	D	2.639
234	D	2.65301
235	D	2.35833
236	D	2.56719
237	D	2.57989
238	D	2.51115
239	D	2.47174
240	D	2.4354
241	D	1.96951
242	D	2.64251
243	D	2.69505
244	D	2.79138
245	D	2.14947
246	D	2.26761
247	D	2.20621
248	D	2.15726
249	D	2.0162
250	D	2.35127
251	D	2.10475
252	D	2.42024
253	D	2.19597
254	D	2.21911
255	D	2.37975
256	D	1.99618
257	D	2.21244
258	D	2.25871
259	D	2.3219
260	D	2.21867
261	D	2.28853
262	D	1.48845
263	D	2.00863
264	D	2.31478
265	D	2.31701
266	D	1.90673
267	D	2.4611
268	D	2.05787
269	D	1.62883
270	D	1.7257
271	D	0.279787
272	D	2.183
273	D	1.88035
274	D	1.77351
275	D	2.16596
276	D	1.27712
277	D	2.00049
278	D	2.02336
279	D	1.81217
280	D	1.9531
281	D	1.82713
282	D	1.86954
283	D	1.93689
284	D	1.45838
285	D	2.01796
286	E	0.563431
287	E	0
288	E	0.613197
289	E	0.181752
290	E	0.714026
291	E	0.346194
292	E	0.00865486
293	E	0.030292
294	E	0.0272628
295	E	0.265704
296	E	0.0601513
297	E	0.000865486
298	E	0.320663
299	E	0.66729
300	E	0.265704
301	E	0.695851
302	E	0.201658
303	E	0.194302
304	E	0.0714026
305	E	0.807931
