# Supplementary material for: The intrinsically disordered cytoplasmic tail of a dendrite branching receptor uses two distinct mechanisms to regulate the actin cytoskeleton
Source: eLife journal article supplement (doi:10.7554/elife.88492), 2023-07-17
Supplement: fig7-data2 [file Figure 7D Source Data.xlsx]

## Sheet: Quantification
		Intensity #1	Corrected Intensity	Relative Intensity		Intensity #2	Corrected Intensity	Relative Intensity		Intensity #3	Corrected Intensity	Relative Intensity			Average	Std Dev
CapZ without actin		3418.2				1937.16				4878.68
CapZ with actin		14610.3	11192.1	1		8563.28	6626.12	1		13679.8	8801.08	1			1	0
CapZ with F/F-H rap		8831.09	5412.89	0.483635		4257.86	2320.7	0.350235		6915.89	2037.21	0.231473			0.355114	0.126152
CapZ with F/F-H dmso		18368.2	14950	1.33576		8336.57	6399.41	0.965786		16237	11358.3	1.29056			1.19737	0.201827
CapZ with F/F-tag rap		18923	15504.8	1.38533		9248.67	7311.51	1.10344		15426.5	10547.8	1.19847			1.22908	0.14342

## Sheet: Statistics
									* for p< .05
									** for p<.01
CapZ	A	1							*** for p<.001
CapZ	A	1
CapZ	A	1
CapZ with ICD rap	B	0.483635
CapZ with ICD rap	B	0.350235
CapZ with ICD rap	B	0.231473					diff	lwr	upr	p	adj
CapZ with H dmso	C	1.33576				B-A	-0.644886	-1.00817	-0.281597	0.0020672	**	CapZ vs CapZ with H rap
CapZ with H dmso	C	0.965786				C-A	0.19737	-0.165919	0.560658	0.365353		CapZ vs CapZ with H dmso
CapZ with H dmso	C	1.29056				D-A	0.22908	-0.134209	0.592369	0.257525		CapZ vs CapZ with vector
CapZ with vec	D	1.38533				C-B	0.842255	0.478967	1.20554	0.0003412	***	CapZ with H rap vs CapZ with H dmso
CapZ with vec	D	1.10344				D-B	0.873966	0.510677	1.23725	0.000263	***	CapZ with H rap vs CapZ with vector
CapZ with vec	D	1.19847				D-C	0.0317104	-0.331578	0.394999	0.991781		CapZ with h dmso v CapZ with vector
