# Supplementary material for: The intrinsically disordered cytoplasmic tail of a dendrite branching receptor uses two distinct mechanisms to regulate the actin cytoskeleton
Source: eLife journal article supplement (doi:10.7554/elife.88492), 2023-07-17
Supplement: fig7-data2 [file Figure 7E Source Data.xlsx]

## Sheet: Sheet1
Filaments from left to right represent the kymographs from top to bottom
values under the filament name represent the length in # of actin subunits
	time (s)	Actin filament #2	FF-ICD filament #3	FF-ICD filament #5	CapZ filament #5
	10.12	1001.96	1147.37	1235.06	982.72
	115.12	1310.91	1159.21	1402.67	1038.96
	210.12	1487.4	1303.51	1532.17	1203.61
	305.12	1706.07	1433.01	1634.66	1160.69
	400.12	1851.48	1592.48	1749.73	1210.64
	495.12	1989.86	1855.92	1858.14	1236.17
	590.12	2291.04	2039.07	1868.5	1213.6
	685.12	2525.25	2117.51	1890.7	1201.39
	785.12	2803.49	2347.28	1897.73	1232.84
	880.12	3163.87	2617.01	1831.5	1209.9
