# Supplementary material for: The intrinsically disordered cytoplasmic tail of a dendrite branching receptor uses two distinct mechanisms to regulate the actin cytoskeleton
Source: eLife journal article supplement (doi:10.7554/elife.88492), 2023-07-17
Supplement: fig7-figsupp2-data1 [file Figure 7 - figure supplement 2 Source Data.xlsx]

## Sheet: Sheet1
Filaments from left to right represent the kymographs from top to bottom
values under the filament name denote length of the filament in # of actin subunits
actin
	time (s)	Filament #1	Filament #2	Filament #3	Filament #4	Filament #5
	10.12	449.92	1001.96	626.41	645.65	433.27
	115.12	476.93	1310.91	689.68	749.62	631.96
	210.12	699.3	1487.4	880.6	1033.41	831.76
	305.12	957.93	1706.07	1140.34	1217.67	1109.63
	400.12	1196.58	1851.48	1312.76	1475.93	1339.4
	495.12	1387.87	1989.86	1437.45	1655.01	1579.53
	590.12	1575.83	2291.04	1719.39	1812.63	1876.64
	685.12	1835.57	2525.25	2062.38	2239.24	1926.22
	785.12	2287.34	2803.49	2453.47	2783.14	2232.95
	880.12	2558.55	3163.87	2644.39	3087.28	2621.82
HPO30 + rap
	time (s)	Filament #1	Filament #2	Filament #3	Filament #4	Filament #5	Filament #6
	30.12	429.2	483.22	1147.37	341.88	1235.06	464.35
	115.12	451.4	700.04	1159.21	416.25	1402.67	475.82
	210.12	706.7	772.56	1303.51	448.44	1532.17	499.13
	305.12	820.29	865.8	1433.01	639.73	1634.66	498.39
	400.12	990.86	1024.9	1592.48	684.13	1749.73	518.37
	495.12	1061.16	1211.75	1855.92	800.31	1858.14	610.13
	590.12	1305.73	1394.53	2039.07	979.39	1868.5	801.05
	685.12	1473.34	1636.51	2117.51	1038.59	1890.7	983.46
	785.12	1726.42	1800.05	2347.28	1215.82	1897.73	1143.67
	880.12	1854.44	2003.18	2617.01	1485.18	1831.5	1326.82
capZ
	time	Filament #1	Filament #2	Filament #3	Filament #4	Filament #5
	15.0865	575.72	531.32	452.14	485.81	982.72
	110.088	597.18	522.07	499.87	531.32	1038.96
	205.089	666	678.95	467.68	595.33	1203.61
	300.09	523.18	641.95	445.48	594.22	1160.69
	395.092	624.56	650.46	521.7	675.25	1210.64
	490.093	832.87	671.92	493.58	780.7	1236.17
	585.094	987.53	693.01	553.52	961.63	1213.6
	680.095	1141.08	731.86	454.36	1054.5	1201.39
	775.096	1146.63	643.06	515.78	1131.83	1232.84
	870.098	1146.26	697.45	513.19	1176.6	1209.9
